# Supplementary material
Source: publisher figshare collection journal article supplement (https://acs.figshare.com/ndownloader/files/3914449)
Supplement: Supplementary file 1 [file 3914449]

## Sheet: ATCC51142
GI reference	Peptide sequence	Protein reference	Functional category
172055302	SNIAASTALLAGLLLDKDTINK	ref|NC_010547.1|:428430-429266_hypothetical_protein_cce_5217_[Cyanothece_sp._ATCC_51142	si_0962x1xNo_Function_MatchxNo_Function_MatchxNone
172055282	ALETFVEFYLDNAK	ref|NC_010547.1|:c405819-404767_phosphate_binding_protein_[Cyanothece_sp._ATCC_51142	si_0638x0.3xPhosphorus_MetabolismxUnclassified_phosphorus_metabolismxHigh_affinity_phosphate_transporter_and_control_of_PHO_regulon
172055282	AVAIDSGSDPVAPTR	ref|NC_010547.1|:c405819-404767_phosphate_binding_protein_[Cyanothece_sp._ATCC_51142	si_0638x0.3xPhosphorus_MetabolismxUnclassified_phosphorus_metabolismxHigh_affinity_phosphate_transporter_and_control_of_PHO_regulon
172055282	ELVSEVGYIPLPEEGYHLAR	ref|NC_010547.1|:c405819-404767_phosphate_binding_protein_[Cyanothece_sp._ATCC_51142	si_0638x0.3xPhosphorus_MetabolismxUnclassified_phosphorus_metabolismxHigh_affinity_phosphate_transporter_and_control_of_PHO_regulon
172055282	SIQSQQSEK	ref|NC_010547.1|:c405819-404767_phosphate_binding_protein_[Cyanothece_sp._ATCC_51142	si_0638x0.3xPhosphorus_MetabolismxUnclassified_phosphorus_metabolismxHigh_affinity_phosphate_transporter_and_control_of_PHO_regulon
172055275	ASVWDETKDK	ref|NC_010547.1|:399605-400396_phosphate_ABC_transporter_ATP-binding_protein_[Cyanothece_sp._ATCC_51142
172055275	DKLNQSGLALSGGQQQR	ref|NC_010547.1|:399605-400396_phosphate_ABC_transporter_ATP-binding_protein_[Cyanothece_sp._ATCC_51142
172055275	DVTLDIPINK	ref|NC_010547.1|:399605-400396_phosphate_ABC_transporter_ATP-binding_protein_[Cyanothece_sp._ATCC_51142
172055275	IDGTITYHGK	ref|NC_010547.1|:399605-400396_phosphate_ABC_transporter_ATP-binding_protein_[Cyanothece_sp._ATCC_51142
172055275	IGMVFQKPNPFPK	ref|NC_010547.1|:399605-400396_phosphate_ABC_transporter_ATP-binding_protein_[Cyanothece_sp._ATCC_51142
172055275	SIYENIAFGAR	ref|NC_010547.1|:399605-400396_phosphate_ABC_transporter_ATP-binding_protein_[Cyanothece_sp._ATCC_51142
172055275	VGYLVEYDDTEK	ref|NC_010547.1|:399605-400396_phosphate_ABC_transporter_ATP-binding_protein_[Cyanothece_sp._ATCC_51142
172055275	VGYLVEYDDTEKVFHNPAQEATR	ref|NC_010547.1|:399605-400396_phosphate_ABC_transporter_ATP-binding_protein_[Cyanothece_sp._ATCC_51142
172055274	DKLGESGFSLSGGQQQR	ref|NC_010547.1|:398730-399557_phosphate_ABC_transporter_ATP-binding_protein_[Cyanothece_sp._ATCC_51142
172055274	INYHGQDLYASDIDPIEVR	ref|NC_010547.1|:398730-399557_phosphate_ABC_transporter_ATP-binding_protein_[Cyanothece_sp._ATCC_51142
172055274	LGESGFSLSGGQQQR	ref|NC_010547.1|:398730-399557_phosphate_ABC_transporter_ATP-binding_protein_[Cyanothece_sp._ATCC_51142
172055274	LNDLIDSFHLDGK	ref|NC_010547.1|:398730-399557_phosphate_ABC_transporter_ATP-binding_protein_[Cyanothece_sp._ATCC_51142
172055274	TIYDNIAYGAR	ref|NC_010547.1|:398730-399557_phosphate_ABC_transporter_ATP-binding_protein_[Cyanothece_sp._ATCC_51142
172055274	VNNFQGDLDELVETSLR	ref|NC_010547.1|:398730-399557_phosphate_ABC_transporter_ATP-binding_protein_[Cyanothece_sp._ATCC_51142
172055274	VNNFQGDLDELVETSLRR	ref|NC_010547.1|:398730-399557_phosphate_ABC_transporter_ATP-binding_protein_[Cyanothece_sp._ATCC_51142
172055273	IDALAFIGGSR	ref|NC_010547.1|:396998-398623_aldehyde_dehydrogenase_[Cyanothece_sp._ATCC_51142	si_0962x1xNo_Function_MatchxNo_Function_MatchxNone
172055273	QTIGTFPSLNQEAALSTLEAAVTAYNHGR	ref|NC_010547.1|:396998-398623_aldehyde_dehydrogenase_[Cyanothece_sp._ATCC_51142	si_0962x1xNo_Function_MatchxNo_Function_MatchxNone
172055272	SVHAYIMGEHGDSEFPVWSMANIGGAK	ref|NC_010547.1|:395908-396918_L-lactate_dehydrogenase_[Cyanothece_sp._ATCC_51142	si_0080x0.3xCarbohydratesxCentral_carbohydrate_metabolismxTCA_Cycle
172055272	TVNLSLNETEKNQLLNSAK	ref|NC_010547.1|:395908-396918_L-lactate_dehydrogenase_[Cyanothece_sp._ATCC_51142	si_0080x0.3xCarbohydratesxCentral_carbohydrate_metabolismxTCA_Cycle
172055272	VMGSGTVLDTAR	ref|NC_010547.1|:395908-396918_L-lactate_dehydrogenase_[Cyanothece_sp._ATCC_51142	si_0080x0.3xCarbohydratesxCentral_carbohydrate_metabolismxTCA_Cycle
172055271	AAPGYFMAK	ref|NC_010547.1|:393306-395828_glycogen_phosphorylase_[Cyanothece_sp._ATCC_51142	si_0085x0.5xCarbohydratesxDi-_and_oligosaccharidesxMaltose_and_Maltodextrin_Utilization
172055271	AADLSEQISTAGK	ref|NC_010547.1|:393306-395828_glycogen_phosphorylase_[Cyanothece_sp._ATCC_51142	si_0085x0.5xCarbohydratesxDi-_and_oligosaccharidesxMaltose_and_Maltodextrin_Utilization
172055271	AADLSEQISTAGKEASGTGNMK	ref|NC_010547.1|:393306-395828_glycogen_phosphorylase_[Cyanothece_sp._ATCC_51142	si_0085x0.5xCarbohydratesxDi-_and_oligosaccharidesxMaltose_and_Maltodextrin_Utilization
172055271	FNVGDYYGAVDDKVNSENITK	ref|NC_010547.1|:393306-395828_glycogen_phosphorylase_[Cyanothece_sp._ATCC_51142	si_0085x0.5xCarbohydratesxDi-_and_oligosaccharidesxMaltose_and_Maltodextrin_Utilization
172055271	FTNVTNGVTPR	ref|NC_010547.1|:393306-395828_glycogen_phosphorylase_[Cyanothece_sp._ATCC_51142	si_0085x0.5xCarbohydratesxDi-_and_oligosaccharidesxMaltose_and_Maltodextrin_Utilization
172055271	GVLDLIASGFFSHGDPELFR	ref|NC_010547.1|:393306-395828_glycogen_phosphorylase_[Cyanothece_sp._ATCC_51142	si_0085x0.5xCarbohydratesxDi-_and_oligosaccharidesxMaltose_and_Maltodextrin_Utilization
172055271	SIVDNLLYDDPYLLLADYK	ref|NC_010547.1|:393306-395828_glycogen_phosphorylase_[Cyanothece_sp._ATCC_51142	si_0085x0.5xCarbohydratesxDi-_and_oligosaccharidesxMaltose_and_Maltodextrin_Utilization
172055271	VNTVNTMR	ref|NC_010547.1|:393306-395828_glycogen_phosphorylase_[Cyanothece_sp._ATCC_51142	si_0085x0.5xCarbohydratesxDi-_and_oligosaccharidesxMaltose_and_Maltodextrin_Utilization
172055271	VYPAADLSEQISTAGK	ref|NC_010547.1|:393306-395828_glycogen_phosphorylase_[Cyanothece_sp._ATCC_51142	si_0085x0.5xCarbohydratesxDi-_and_oligosaccharidesxMaltose_and_Maltodextrin_Utilization
172055271	VYPAADLSEQISTAGKEASGTGNMK	ref|NC_010547.1|:393306-395828_glycogen_phosphorylase_[Cyanothece_sp._ATCC_51142	si_0085x0.5xCarbohydratesxDi-_and_oligosaccharidesxMaltose_and_Maltodextrin_Utilization
172055269	DYVNVIVADKQK	ref|NC_010547.1|:390265-392673_putative_phosphoketolase_[Cyanothece_sp._ATCC_51142	si_0041x0.3xAmino_Acids_and_DerivativesxLysine,_threonine,_methionine,_and_cysteinexLysine_fermentation
172055269	FVNVVDLFK	ref|NC_010547.1|:390265-392673_putative_phosphoketolase_[Cyanothece_sp._ATCC_51142	si_0041x0.3xAmino_Acids_and_DerivativesxLysine,_threonine,_methionine,_and_cysteinexLysine_fermentation
172055269	IANPTILAR	ref|NC_010547.1|:390265-392673_putative_phosphoketolase_[Cyanothece_sp._ATCC_51142	si_0041x0.3xAmino_Acids_and_DerivativesxLysine,_threonine,_methionine,_and_cysteinexLysine_fermentation
172055269	LGSAAAYVQQR	ref|NC_010547.1|:390265-392673_putative_phosphoketolase_[Cyanothece_sp._ATCC_51142	si_0041x0.3xAmino_Acids_and_DerivativesxLysine,_threonine,_methionine,_and_cysteinexLysine_fermentation
172055269	LQSESEHPHGLSDR	ref|NC_010547.1|:390265-392673_putative_phosphoketolase_[Cyanothece_sp._ATCC_51142	si_0041x0.3xAmino_Acids_and_DerivativesxLysine,_threonine,_methionine,_and_cysteinexLysine_fermentation
172055269	SKDYVNVIVADKQK	ref|NC_010547.1|:390265-392673_putative_phosphoketolase_[Cyanothece_sp._ATCC_51142	si_0041x0.3xAmino_Acids_and_DerivativesxLysine,_threonine,_methionine,_and_cysteinexLysine_fermentation
172055269	VFGPDETASNR	ref|NC_010547.1|:390265-392673_putative_phosphoketolase_[Cyanothece_sp._ATCC_51142	si_0041x0.3xAmino_Acids_and_DerivativesxLysine,_threonine,_methionine,_and_cysteinexLysine_fermentation
172055268	ILVLNAGSSSQK	ref|NC_010547.1|:388876-390102_acetate_kinase_[Cyanothece_sp._ATCC_51142	si_0041x0.1xAmino_Acids_and_DerivativesxLysine,_threonine,_methionine,_and_cysteinexLysine_fermentation
172055268	SIDTTMGFTPLEGLMMGTR	ref|NC_010547.1|:388876-390102_acetate_kinase_[Cyanothece_sp._ATCC_51142	si_0041x0.1xAmino_Acids_and_DerivativesxLysine,_threonine,_methionine,_and_cysteinexLysine_fermentation
172055266	EVTPIAEVHR	ref|NC_010547.1|:c386866-385223_hypothetical_protein_cce_5181_[Cyanothece_sp._ATCC_51142
172055266	IGISSENLIFEEEITSLAEQATK	ref|NC_010547.1|:c386866-385223_hypothetical_protein_cce_5181_[Cyanothece_sp._ATCC_51142
172055266	KEVTPIAEVHRQ	ref|NC_010547.1|:c386866-385223_hypothetical_protein_cce_5181_[Cyanothece_sp._ATCC_51142
172055266	LDARPIISQNASETLDELLK	ref|NC_010547.1|:c386866-385223_hypothetical_protein_cce_5181_[Cyanothece_sp._ATCC_51142
172055264	AIDETMIAIDSTPNK	ref|NC_010547.1|:c383508-382234_phosphopyruvate_hydratase_[Cyanothece_sp._ATCC_51142	si_0065x0.2xCarbohydratesxCentral_carbohydrate_metabolismxEntner-Doudoroff_Pathway
172055264	AVDNVNNHLAPALVGMDITEQR	ref|NC_010547.1|:c383508-382234_phosphopyruvate_hydratase_[Cyanothece_sp._ATCC_51142	si_0065x0.2xCarbohydratesxCentral_carbohydrate_metabolismxEntner-Doudoroff_Pathway
172055264	GLSTGIGDEGGFAPNLK	ref|NC_010547.1|:c383508-382234_phosphopyruvate_hydratase_[Cyanothece_sp._ATCC_51142	si_0065x0.2xCarbohydratesxCentral_carbohydrate_metabolismxEntner-Doudoroff_Pathway
172055264	SGETEDTTIADLVVATGAGQIK	ref|NC_010547.1|:c383508-382234_phosphopyruvate_hydratase_[Cyanothece_sp._ATCC_51142	si_0065x0.2xCarbohydratesxCentral_carbohydrate_metabolismxEntner-Doudoroff_Pathway
172055264	TIIASEMLDSR	ref|NC_010547.1|:c383508-382234_phosphopyruvate_hydratase_[Cyanothece_sp._ATCC_51142	si_0065x0.2xCarbohydratesxCentral_carbohydrate_metabolismxEntner-Doudoroff_Pathway
172055264	VNQIGSLTETLDTIELAQK	ref|NC_010547.1|:c383508-382234_phosphopyruvate_hydratase_[Cyanothece_sp._ATCC_51142	si_0065x0.2xCarbohydratesxCentral_carbohydrate_metabolismxEntner-Doudoroff_Pathway
172055263	GSTDQHAYVQQLR	ref|NC_010547.1|:c382140-380566_glucose-6-phosphate_isomerase_[Cyanothece_sp._ATCC_51142	si_0068x0.5xCarbohydratesxCentral_carbohydrate_metabolismxGlycolysis_and_Gluconeogenesis
172055263	MVGHYWLR	ref|NC_010547.1|:c382140-380566_glucose-6-phosphate_isomerase_[Cyanothece_sp._ATCC_51142	si_0068x0.5xCarbohydratesxCentral_carbohydrate_metabolismxGlycolysis_and_Gluconeogenesis
172055263	SLEVEPEATSGDFLSGFLLGTR	ref|NC_010547.1|:c382140-380566_glucose-6-phosphate_isomerase_[Cyanothece_sp._ATCC_51142	si_0068x0.5xCarbohydratesxCentral_carbohydrate_metabolismxGlycolysis_and_Gluconeogenesis
172055263	TVGALIALYER	ref|NC_010547.1|:c382140-380566_glucose-6-phosphate_isomerase_[Cyanothece_sp._ATCC_51142	si_0068x0.5xCarbohydratesxCentral_carbohydrate_metabolismxGlycolysis_and_Gluconeogenesis
172055263	YLQQLVMESLGK	ref|NC_010547.1|:c382140-380566_glucose-6-phosphate_isomerase_[Cyanothece_sp._ATCC_51142	si_0068x0.5xCarbohydratesxCentral_carbohydrate_metabolismxGlycolysis_and_Gluconeogenesis
172055263	YLQQLVMESLGKEQ	ref|NC_010547.1|:c382140-380566_glucose-6-phosphate_isomerase_[Cyanothece_sp._ATCC_51142	si_0068x0.5xCarbohydratesxCentral_carbohydrate_metabolismxGlycolysis_and_Gluconeogenesis
172055262	ELDLPLTILQDLQGPK	ref|NC_010547.1|:c380534-379107_pyruvate_kinase_[Cyanothece_sp._ATCC_51142	si_0065x0.1xCarbohydratesxCentral_carbohydrate_metabolismxEntner-Doudoroff_Pathway
172055262	GIPVITATQMLDSMIR	ref|NC_010547.1|:c380534-379107_pyruvate_kinase_[Cyanothece_sp._ATCC_51142	si_0065x0.1xCarbohydratesxCentral_carbohydrate_metabolismxEntner-Doudoroff_Pathway
172055262	LNFSHGSYEDHGQMVK	ref|NC_010547.1|:c380534-379107_pyruvate_kinase_[Cyanothece_sp._ATCC_51142	si_0065x0.1xCarbohydratesxCentral_carbohydrate_metabolismxEntner-Doudoroff_Pathway
172055262	QLSEELDLPLTILQDLQGPK	ref|NC_010547.1|:c380534-379107_pyruvate_kinase_[Cyanothece_sp._ATCC_51142	si_0065x0.1xCarbohydratesxCentral_carbohydrate_metabolismxEntner-Doudoroff_Pathway
172055262	YDGLTLEQLLEQMESVLLER	ref|NC_010547.1|:c380534-379107_pyruvate_kinase_[Cyanothece_sp._ATCC_51142	si_0065x0.1xCarbohydratesxCentral_carbohydrate_metabolismxEntner-Doudoroff_Pathway
172055261	HGQSLWNAANK	ref|NC_010547.1|:c379100-378405_phosphoglyceromutase_[Cyanothece_sp._ATCC_51142	si_0065x0.3xCarbohydratesxCentral_carbohydrate_metabolismxEntner-Doudoroff_Pathway
172055261	YYGDLQGLNK	ref|NC_010547.1|:c379100-378405_phosphoglyceromutase_[Cyanothece_sp._ATCC_51142	si_0065x0.3xCarbohydratesxCentral_carbohydrate_metabolismxEntner-Doudoroff_Pathway
172055259	ATQSIDFSR	ref|NC_010547.1|:375892-378093_polyphosphate_kinase_[Cyanothece_sp._ATCC_51142	si_0602x0.3xNucleosides_and_NucleotidesxPurinesxPurine_conversions
172055259	QQIFPVLTPLAVDPGHPFPK	ref|NC_010547.1|:375892-378093_polyphosphate_kinase_[Cyanothece_sp._ATCC_51142	si_0602x0.3xNucleosides_and_NucleotidesxPurinesxPurine_conversions
172055259	VSTLKEQVEAK	ref|NC_010547.1|:375892-378093_polyphosphate_kinase_[Cyanothece_sp._ATCC_51142	si_0602x0.3xNucleosides_and_NucleotidesxPurinesxPurine_conversions
172055259	YVHIGTGNYNSK	ref|NC_010547.1|:375892-378093_polyphosphate_kinase_[Cyanothece_sp._ATCC_51142	si_0602x0.3xNucleosides_and_NucleotidesxPurinesxPurine_conversions
172055258	GNLLSQIEATSAPQQLHSLQQQLLEVEEK	ref|NC_010547.1|:c375742-375431_hypothetical_protein_cce_5173_[Cyanothece_sp._ATCC_51142	si_0962x1xNo_Function_MatchxNo_Function_MatchxNone
172055258	LTYFHVLNNSISTVDTILHTSK	ref|NC_010547.1|:c375742-375431_hypothetical_protein_cce_5173_[Cyanothece_sp._ATCC_51142	si_0962x1xNo_Function_MatchxNo_Function_MatchxNone
172055258	MENQKPQWTLNDDSILSLATHLHR	ref|NC_010547.1|:c375742-375431_hypothetical_protein_cce_5173_[Cyanothece_sp._ATCC_51142	si_0962x1xNo_Function_MatchxNo_Function_MatchxNone
172055258	MITEFKQSSDFSTNS	ref|NC_010547.1|:c375742-375431_hypothetical_protein_cce_5173_[Cyanothece_sp._ATCC_51142	si_0962x1xNo_Function_MatchxNo_Function_MatchxNone
172055257	SSTAMAQTDTQLVSLDHQHFLFAVQQSPIFALEVMK	ref|NC_010547.1|:c375377-374937_hypothetical_protein_cce_5172_[Cyanothece_sp._ATCC_51142
172055250	AIVELTDTDKLGIDEAVHQAR	ref|NC_010547.1|:c372503-371541_hypothetical_protein_cce_5165_[Cyanothece_sp._ATCC_51142	si_0962x1xNo_Function_MatchxNo_Function_MatchxNone
172055250	EKAIVELTDTDKLGIDEAVHQAR	ref|NC_010547.1|:c372503-371541_hypothetical_protein_cce_5165_[Cyanothece_sp._ATCC_51142	si_0962x1xNo_Function_MatchxNo_Function_MatchxNone
172055250	ELQVDYHREYQR	ref|NC_010547.1|:c372503-371541_hypothetical_protein_cce_5165_[Cyanothece_sp._ATCC_51142	si_0962x1xNo_Function_MatchxNo_Function_MatchxNone
172055250	FDIEKNLETLTALIDR	ref|NC_010547.1|:c372503-371541_hypothetical_protein_cce_5165_[Cyanothece_sp._ATCC_51142	si_0962x1xNo_Function_MatchxNo_Function_MatchxNone
172055250	FILNNSERFDIEKNLETLTALIDR	ref|NC_010547.1|:c372503-371541_hypothetical_protein_cce_5165_[Cyanothece_sp._ATCC_51142	si_0962x1xNo_Function_MatchxNo_Function_MatchxNone
172055250	FILNNSERFDIEKNLETLTALIDRR	ref|NC_010547.1|:c372503-371541_hypothetical_protein_cce_5165_[Cyanothece_sp._ATCC_51142	si_0962x1xNo_Function_MatchxNo_Function_MatchxNone
172055250	GELQLSAIFLGQR	ref|NC_010547.1|:c372503-371541_hypothetical_protein_cce_5165_[Cyanothece_sp._ATCC_51142	si_0962x1xNo_Function_MatchxNo_Function_MatchxNone
172055250	IYTEKPTIFIER	ref|NC_010547.1|:c372503-371541_hypothetical_protein_cce_5165_[Cyanothece_sp._ATCC_51142	si_0962x1xNo_Function_MatchxNo_Function_MatchxNone
172055250	LGNYWQIWREETQ	ref|NC_010547.1|:c372503-371541_hypothetical_protein_cce_5165_[Cyanothece_sp._ATCC_51142	si_0962x1xNo_Function_MatchxNo_Function_MatchxNone
172055250	LKGQESIPR	ref|NC_010547.1|:c372503-371541_hypothetical_protein_cce_5165_[Cyanothece_sp._ATCC_51142	si_0962x1xNo_Function_MatchxNo_Function_MatchxNone
172055250	NLETLTALIDR	ref|NC_010547.1|:c372503-371541_hypothetical_protein_cce_5165_[Cyanothece_sp._ATCC_51142	si_0962x1xNo_Function_MatchxNo_Function_MatchxNone
172055250	RGELQLSAIFLGQR	ref|NC_010547.1|:c372503-371541_hypothetical_protein_cce_5165_[Cyanothece_sp._ATCC_51142	si_0962x1xNo_Function_MatchxNo_Function_MatchxNone
172055250	VLIETLDNLTTHFADTVTPMTFTDIRR	ref|NC_010547.1|:c372503-371541_hypothetical_protein_cce_5165_[Cyanothece_sp._ATCC_51142	si_0962x1xNo_Function_MatchxNo_Function_MatchxNone
172055236	AFLMLQDEFALR	ref|NC_010547.1|:c360191-358920_hypothetical_protein_cce_5151_[Cyanothece_sp._ATCC_51142
172055236	DPLILNNVLSDLMLLPGESVR	ref|NC_010547.1|:c360191-358920_hypothetical_protein_cce_5151_[Cyanothece_sp._ATCC_51142
172055236	ETILDDQIPVFIAAAMVNPSGNER	ref|NC_010547.1|:c360191-358920_hypothetical_protein_cce_5151_[Cyanothece_sp._ATCC_51142
172055236	FAPSLAGLVVSNPR	ref|NC_010547.1|:c360191-358920_hypothetical_protein_cce_5151_[Cyanothece_sp._ATCC_51142
172055236	IGAQFQLDNDYYR	ref|NC_010547.1|:c360191-358920_hypothetical_protein_cce_5151_[Cyanothece_sp._ATCC_51142
172055236	ITVFSGPIYGEFPR	ref|NC_010547.1|:c360191-358920_hypothetical_protein_cce_5151_[Cyanothece_sp._ATCC_51142
172055236	LNIGRFPEEIEVDEPSDLVSANEPR	ref|NC_010547.1|:c360191-358920_hypothetical_protein_cce_5151_[Cyanothece_sp._ATCC_51142
172055236	LRDNILADYVNYSIITNQEKR	ref|NC_010547.1|:c360191-358920_hypothetical_protein_cce_5151_[Cyanothece_sp._ATCC_51142
172055236	TGYDPNFLGEGIILPLPR	ref|NC_010547.1|:c360191-358920_hypothetical_protein_cce_5151_[Cyanothece_sp._ATCC_51142
172055236	YQVTITEIENLTGLEFEDAIYEKNPLLFNEDAEAR	ref|NC_010547.1|:c360191-358920_hypothetical_protein_cce_5151_[Cyanothece_sp._ATCC_51142
172055219	LLGIDDNQLEQLIALGK	ref|NC_010547.1|:c347376-346837_hypothetical_protein_cce_5134_[Cyanothece_sp._ATCC_51142	si_0962x1xNo_Function_MatchxNo_Function_MatchxNone
172055210	DKLPFNILNTFGVLDAK	ref|NC_010547.1|:c342964-342206_hypothetical_protein_cce_5125_[Cyanothece_sp._ATCC_51142	si_0962x1xNo_Function_MatchxNo_Function_MatchxNone
172055210	IDVANVCVECLNYDVTINQAIDIINSGVRPAVIDWK	ref|NC_010547.1|:c342964-342206_hypothetical_protein_cce_5125_[Cyanothece_sp._ATCC_51142	si_0962x1xNo_Function_MatchxNo_Function_MatchxNone
172055210	LIDGPYTSYDLNTLLR	ref|NC_010547.1|:c342964-342206_hypothetical_protein_cce_5125_[Cyanothece_sp._ATCC_51142	si_0962x1xNo_Function_MatchxNo_Function_MatchxNone
172055210	NTPQAVDGEGVK	ref|NC_010547.1|:c342964-342206_hypothetical_protein_cce_5125_[Cyanothece_sp._ATCC_51142	si_0962x1xNo_Function_MatchxNo_Function_MatchxNone
172055210	WDFANLFDPK	ref|NC_010547.1|:c342964-342206_hypothetical_protein_cce_5125_[Cyanothece_sp._ATCC_51142	si_0962x1xNo_Function_MatchxNo_Function_MatchxNone
172055207	AAMTVAQDNAEKFVDFVSYLFDHQSEFNEK	ref|NC_010547.1|:c341069-340494_hypothetical_protein_cce_5122_[Cyanothece_sp._ATCC_51142
172055205	EGEAIADPSNNPR	ref|NC_010547.1|:339323-340252_hypothetical_protein_cce_5120_[Cyanothece_sp._ATCC_51142	si_0962x1xNo_Function_MatchxNo_Function_MatchxNone
172055173	QIATSGSNMQR	ref|NC_010547.1|:313279-314220_AraC_family_transcriptional_regulator_[Cyanothece_sp._ATCC_51142	si_0106x1xCarbohydratesxMonosaccharidesxD-gluconate_and_ketogluconates_metabolism
172055159	AMNLRSPAPVQSR	ref|NC_010547.1|:305783-306382_LexA-like_protein_[Cyanothece_sp._ATCC_51142	si_0405x0.5xDNA_MetabolismxDNA_repairxDNA_repair,_bacterial
172055159	SPAPVQSR	ref|NC_010547.1|:305783-306382_LexA-like_protein_[Cyanothece_sp._ATCC_51142	si_0405x0.5xDNA_MetabolismxDNA_repairxDNA_repair,_bacterial
172055159	SPAPVQSRLER	ref|NC_010547.1|:305783-306382_LexA-like_protein_[Cyanothece_sp._ATCC_51142	si_0405x0.5xDNA_MetabolismxDNA_repairxDNA_repair,_bacterial
172055158	IIEKHEGPETWESVFR	ref|NC_010547.1|:305338-305733_hypothetical_protein_cce_5073_[Cyanothece_sp._ATCC_51142	si_0962x1xNo_Function_MatchxNo_Function_MatchxNone
172055158	MKLTQLSETTLSK	ref|NC_010547.1|:305338-305733_hypothetical_protein_cce_5073_[Cyanothece_sp._ATCC_51142	si_0962x1xNo_Function_MatchxNo_Function_MatchxNone
172055154	AIAAETGQPQSVVTK	ref|NC_010547.1|:304044-304322_DNA_binding_protein_HU_[Cyanothece_sp._ATCC_51142	si_0426x1xDNA_MetabolismxUnclassified_dna_metabolismxDNA_structural_proteins,_bacterial
172055154	ILNATTETIVETVANGDKITLVGFGTFEPR	ref|NC_010547.1|:304044-304322_DNA_binding_protein_HU_[Cyanothece_sp._ATCC_51142	si_0426x1xDNA_MetabolismxUnclassified_dna_metabolismxDNA_structural_proteins,_bacterial
172055154	ITLVGFGTFEPR	ref|NC_010547.1|:304044-304322_DNA_binding_protein_HU_[Cyanothece_sp._ATCC_51142	si_0426x1xDNA_MetabolismxUnclassified_dna_metabolismxDNA_structural_proteins,_bacterial
172055154	QGKNPQTGEPLTIPATTIPAFSASK	ref|NC_010547.1|:304044-304322_DNA_binding_protein_HU_[Cyanothece_sp._ATCC_51142	si_0426x1xDNA_MetabolismxUnclassified_dna_metabolismxDNA_structural_proteins,_bacterial
172055151	QLPEAEQNEVAK	ref|NC_010547.1|:c302121-301900_hypothetical_protein_cce_5066_[Cyanothece_sp._ATCC_51142	si_0962x1xNo_Function_MatchxNo_Function_MatchxNone
172055117	ALQAITEYLGQVGHIFAPIPR	ref|NC_010547.1|:268705-269463_putative_cobyrinic_acid_a,c-diamide_synthase_[Cyanothece_sp._ATCC_51142	si_0153x0.3xCell_Division_and_Cell_CyclexUnclassified_cell_division_and_cell_cyclexBacterial_Cytoskeleton
172055117	LAGFVPILYAK	ref|NC_010547.1|:268705-269463_putative_cobyrinic_acid_a,c-diamide_synthase_[Cyanothece_sp._ATCC_51142	si_0153x0.3xCell_Division_and_Cell_CyclexUnclassified_cell_division_and_cell_cyclexBacterial_Cytoskeleton
172055097	FTYAEYLTNLQESLDALEQVAQLAVR	ref|NC_010547.1|:c247661-244347_hypothetical_protein_cce_5012_[Cyanothece_sp._ATCC_51142	si_0962x1xNo_Function_MatchxNo_Function_MatchxNone
172055097	QLLATVYSFVGDLDNAIEQGKR	ref|NC_010547.1|:c247661-244347_hypothetical_protein_cce_5012_[Cyanothece_sp._ATCC_51142	si_0962x1xNo_Function_MatchxNo_Function_MatchxNone
172055096	ITGSVNVNAR	ref|NC_010547.1|:c244331-243615_hypothetical_protein_cce_5011_[Cyanothece_sp._ATCC_51142
172055096	SVKEQEPVQFTIDDKGK	ref|NC_010547.1|:c244331-243615_hypothetical_protein_cce_5011_[Cyanothece_sp._ATCC_51142
172055054	ASQQKEVQAR	ref|NC_010547.1|:196018-197154_hypothetical_protein_cce_4969_[Cyanothece_sp._ATCC_51142
172055054	ATAKNDVEEKERIEQLIVK	ref|NC_010547.1|:196018-197154_hypothetical_protein_cce_4969_[Cyanothece_sp._ATCC_51142
172055054	AYQLIAGTVLYEVLEDNLK	ref|NC_010547.1|:196018-197154_hypothetical_protein_cce_4969_[Cyanothece_sp._ATCC_51142
172055054	AYQLIAGTVLYEVLEDNLKGDYSLPK	ref|NC_010547.1|:196018-197154_hypothetical_protein_cce_4969_[Cyanothece_sp._ATCC_51142
172055054	DSIDVANQEGKELTESIVR	ref|NC_010547.1|:196018-197154_hypothetical_protein_cce_4969_[Cyanothece_sp._ATCC_51142
172055054	HYKDSIDVANQEGK	ref|NC_010547.1|:196018-197154_hypothetical_protein_cce_4969_[Cyanothece_sp._ATCC_51142
172055054	HYKDSIDVANQEGKELTESIVR	ref|NC_010547.1|:196018-197154_hypothetical_protein_cce_4969_[Cyanothece_sp._ATCC_51142
172055054	KMPADKVYQQETNEK	ref|NC_010547.1|:196018-197154_hypothetical_protein_cce_4969_[Cyanothece_sp._ATCC_51142
172055054	LANYIVGMTASYQGTK	ref|NC_010547.1|:196018-197154_hypothetical_protein_cce_4969_[Cyanothece_sp._ATCC_51142
172055054	LHQIEDPNKR	ref|NC_010547.1|:196018-197154_hypothetical_protein_cce_4969_[Cyanothece_sp._ATCC_51142
172055054	LKTIYDAIQSSEDKDKR	ref|NC_010547.1|:196018-197154_hypothetical_protein_cce_4969_[Cyanothece_sp._ATCC_51142
172055054	NDVEEKERIEQLIVK	ref|NC_010547.1|:196018-197154_hypothetical_protein_cce_4969_[Cyanothece_sp._ATCC_51142
172055054	RAELENIVIEHSQSFTIIGK	ref|NC_010547.1|:196018-197154_hypothetical_protein_cce_4969_[Cyanothece_sp._ATCC_51142
172055054	SRAYQLIAGTVLYEVLEDNLKGDYSLPK	ref|NC_010547.1|:196018-197154_hypothetical_protein_cce_4969_[Cyanothece_sp._ATCC_51142
172055054	STDTVARVETLKPDQVDSIEDREEQIAK	ref|NC_010547.1|:196018-197154_hypothetical_protein_cce_4969_[Cyanothece_sp._ATCC_51142
172055054	TIEDYFEIKDDPQQPQ	ref|NC_010547.1|:196018-197154_hypothetical_protein_cce_4969_[Cyanothece_sp._ATCC_51142
172055054	VETLKPDQVDSIEDREEQIAK	ref|NC_010547.1|:196018-197154_hypothetical_protein_cce_4969_[Cyanothece_sp._ATCC_51142
172055054	VYQQETNEKIK	ref|NC_010547.1|:196018-197154_hypothetical_protein_cce_4969_[Cyanothece_sp._ATCC_51142
172055054	WDVYVDETFGIVK	ref|NC_010547.1|:196018-197154_hypothetical_protein_cce_4969_[Cyanothece_sp._ATCC_51142
172055018	GQTVAGLAALLVEK	ref|NC_010547.1|:163425-163712_hypothetical_protein_cce_4933_[Cyanothece_sp._ATCC_51142
172055018	LSEDTSASLR	ref|NC_010547.1|:163425-163712_hypothetical_protein_cce_4933_[Cyanothece_sp._ATCC_51142
172055018	LSEDTSASLRELAKEEGLTPAALAQK	ref|NC_010547.1|:163425-163712_hypothetical_protein_cce_4933_[Cyanothece_sp._ATCC_51142
172055012	FQEGKIYFQNRYIRTEGYLK	ref|NC_010547.1|:c153731-152286_carotenoid_oxygenase_[Cyanothece_sp._ATCC_51142	si_0962x1xNo_Function_MatchxNo_Function_MatchxNone
172055000	DLGYLPGEITEK	ref|NC_010547.1|:143617-144948_hypothetical_protein_cce_4915_[Cyanothece_sp._ATCC_51142	si_0032x0.2xAmino_Acids_and_DerivativesxGlutamine,_glutamate,_aspartate,_asparagine;_ammonia_assimilationxGlutamine,_Glutamate,_Aspartate_and_Asparagine_Biosynthesis
172055000	EQQFALDLLLEESIPLVTLIGK	ref|NC_010547.1|:143617-144948_hypothetical_protein_cce_4915_[Cyanothece_sp._ATCC_51142	si_0032x0.2xAmino_Acids_and_DerivativesxGlutamine,_glutamate,_aspartate,_asparagine;_ammonia_assimilationxGlutamine,_Glutamate,_Aspartate_and_Asparagine_Biosynthesis
172055000	FKNDALAGHVTLIK	ref|NC_010547.1|:143617-144948_hypothetical_protein_cce_4915_[Cyanothece_sp._ATCC_51142	si_0032x0.2xAmino_Acids_and_DerivativesxGlutamine,_glutamate,_aspartate,_asparagine;_ammonia_assimilationxGlutamine,_Glutamate,_Aspartate_and_Asparagine_Biosynthesis
172055000	GLLQIEPLTYIR	ref|NC_010547.1|:143617-144948_hypothetical_protein_cce_4915_[Cyanothece_sp._ATCC_51142	si_0032x0.2xAmino_Acids_and_DerivativesxGlutamine,_glutamate,_aspartate,_asparagine;_ammonia_assimilationxGlutamine,_Glutamate,_Aspartate_and_Asparagine_Biosynthesis
172055000	IVLTGDIQQIDNPYVDGASNGLTYVVER	ref|NC_010547.1|:143617-144948_hypothetical_protein_cce_4915_[Cyanothece_sp._ATCC_51142	si_0032x0.2xAmino_Acids_and_DerivativesxGlutamine,_glutamate,_aspartate,_asparagine;_ammonia_assimilationxGlutamine,_Glutamate,_Aspartate_and_Asparagine_Biosynthesis
172055000	IYDNFDLILGTQNPSNKP	ref|NC_010547.1|:143617-144948_hypothetical_protein_cce_4915_[Cyanothece_sp._ATCC_51142	si_0032x0.2xAmino_Acids_and_DerivativesxGlutamine,_glutamate,_aspartate,_asparagine;_ammonia_assimilationxGlutamine,_Glutamate,_Aspartate_and_Asparagine_Biosynthesis
172055000	IYDNFDLILGTQNPSNKPAHWR	ref|NC_010547.1|:143617-144948_hypothetical_protein_cce_4915_[Cyanothece_sp._ATCC_51142	si_0032x0.2xAmino_Acids_and_DerivativesxGlutamine,_glutamate,_aspartate,_asparagine;_ammonia_assimilationxGlutamine,_Glutamate,_Aspartate_and_Asparagine_Biosynthesis
172055000	LLISRPVIPMGR	ref|NC_010547.1|:143617-144948_hypothetical_protein_cce_4915_[Cyanothece_sp._ATCC_51142	si_0032x0.2xAmino_Acids_and_DerivativesxGlutamine,_glutamate,_aspartate,_asparagine;_ammonia_assimilationxGlutamine,_Glutamate,_Aspartate_and_Asparagine_Biosynthesis
172055000	LTEGITLENGGSLR	ref|NC_010547.1|:143617-144948_hypothetical_protein_cce_4915_[Cyanothece_sp._ATCC_51142	si_0032x0.2xAmino_Acids_and_DerivativesxGlutamine,_glutamate,_aspartate,_asparagine;_ammonia_assimilationxGlutamine,_Glutamate,_Aspartate_and_Asparagine_Biosynthesis
172055000	NREQQFALDLLLEESIPLVTLIGK	ref|NC_010547.1|:143617-144948_hypothetical_protein_cce_4915_[Cyanothece_sp._ATCC_51142	si_0032x0.2xAmino_Acids_and_DerivativesxGlutamine,_glutamate,_aspartate,_asparagine;_ammonia_assimilationxGlutamine,_Glutamate,_Aspartate_and_Asparagine_Biosynthesis
172055000	QFLIVDEAQNLTPHEVK	ref|NC_010547.1|:143617-144948_hypothetical_protein_cce_4915_[Cyanothece_sp._ATCC_51142	si_0032x0.2xAmino_Acids_and_DerivativesxGlutamine,_glutamate,_aspartate,_asparagine;_ammonia_assimilationxGlutamine,_Glutamate,_Aspartate_and_Asparagine_Biosynthesis
172055000	QIVLPTELLPNQLVTLIDAVNPHHTALGR	ref|NC_010547.1|:143617-144948_hypothetical_protein_cce_4915_[Cyanothece_sp._ATCC_51142	si_0032x0.2xAmino_Acids_and_DerivativesxGlutamine,_glutamate,_aspartate,_asparagine;_ammonia_assimilationxGlutamine,_Glutamate,_Aspartate_and_Asparagine_Biosynthesis
172055000	QLLPLFTVPSSGIAR	ref|NC_010547.1|:143617-144948_hypothetical_protein_cce_4915_[Cyanothece_sp._ATCC_51142	si_0032x0.2xAmino_Acids_and_DerivativesxGlutamine,_glutamate,_aspartate,_asparagine;_ammonia_assimilationxGlutamine,_Glutamate,_Aspartate_and_Asparagine_Biosynthesis
172055000	TIPKQFLIVDEAQNLTPHEVK	ref|NC_010547.1|:143617-144948_hypothetical_protein_cce_4915_[Cyanothece_sp._ATCC_51142	si_0032x0.2xAmino_Acids_and_DerivativesxGlutamine,_glutamate,_aspartate,_asparagine;_ammonia_assimilationxGlutamine,_Glutamate,_Aspartate_and_Asparagine_Biosynthesis
172055000	TLLAIAAGIHQVADEKR	ref|NC_010547.1|:143617-144948_hypothetical_protein_cce_4915_[Cyanothece_sp._ATCC_51142	si_0032x0.2xAmino_Acids_and_DerivativesxGlutamine,_glutamate,_aspartate,_asparagine;_ammonia_assimilationxGlutamine,_Glutamate,_Aspartate_and_Asparagine_Biosynthesis
172055000	TYVLDTNVLLHDPTALFQFEDNEVVLPITIIEELDR	ref|NC_010547.1|:143617-144948_hypothetical_protein_cce_4915_[Cyanothece_sp._ATCC_51142	si_0032x0.2xAmino_Acids_and_DerivativesxGlutamine,_glutamate,_aspartate,_asparagine;_ammonia_assimilationxGlutamine,_Glutamate,_Aspartate_and_Asparagine_Biosynthesis
172055000	TYVLDTNVLLHDPTALFQFEDNEVVLPITIIEELDRFK	ref|NC_010547.1|:143617-144948_hypothetical_protein_cce_4915_[Cyanothece_sp._ATCC_51142	si_0032x0.2xAmino_Acids_and_DerivativesxGlutamine,_glutamate,_aspartate,_asparagine;_ammonia_assimilationxGlutamine,_Glutamate,_Aspartate_and_Asparagine_Biosynthesis
172054987	LVDSTEILAEILHPSLFNYGFK	ref|NC_010547.1|:c133144-132215_putative_substrate-binding_protein_of_ABC_transporter_[Cyanothece_sp._ATCC_51142	si_0482x1xIron_acquisition_and_metabolismxUnclassified_iron_acquisition_and_metabolismxHeme,_hemin_uptake_and_utilization_systems_in_GramPositives
172054981	SLDEAFNDLEANLKDIIEDIGLE	ref|NC_010547.1|:129459-129686_hypothetical_protein_cce_4896_[Cyanothece_sp._ATCC_51142
172054974	DKGVSDLGR	ref|NC_010547.1|:125475-126431_glucose/ribitol_short_chain_dehydrogenase/reductase_family_protein_[Cyanothece_sp._ATCC_51142	si_0389x1xCofactors,_Vitamins,_Prosthetic_Groups,_PigmentsxTetrapyrrolesxChlorophyll_Biosynthesis
172054974	IIFVSSDTHDPSK	ref|NC_010547.1|:125475-126431_glucose/ribitol_short_chain_dehydrogenase/reductase_family_protein_[Cyanothece_sp._ATCC_51142	si_0389x1xCofactors,_Vitamins,_Prosthetic_Groups,_PigmentsxTetrapyrrolesxChlorophyll_Biosynthesis
172054974	INTPQQSGR	ref|NC_010547.1|:125475-126431_glucose/ribitol_short_chain_dehydrogenase/reductase_family_protein_[Cyanothece_sp._ATCC_51142	si_0389x1xCofactors,_Vitamins,_Prosthetic_Groups,_PigmentsxTetrapyrrolesxChlorophyll_Biosynthesis
172054970	LGTRTDREQTIADKLDSVNSNLTGI	ref|NC_010547.1|:122017-122322_hypothetical_protein_cce_4885_[Cyanothece_sp._ATCC_51142	si_0962x1xNo_Function_MatchxNo_Function_MatchxNone
172054970	TDREQTIADKLDSVNSNLTGI	ref|NC_010547.1|:122017-122322_hypothetical_protein_cce_4885_[Cyanothece_sp._ATCC_51142	si_0962x1xNo_Function_MatchxNo_Function_MatchxNone
172054968	IPTQAILDPEQLFETIDTISDKYDSIVVDGPAGLSEVTK	ref|NC_010547.1|:120448-121086_hypothetical_protein_cce_4883_[Cyanothece_sp._ATCC_51142	si_0153x0.3xCell_Division_and_Cell_CyclexUnclassified_cell_division_and_cell_cyclexBacterial_Cytoskeleton
172054968	SASTDYQNLFQEALK	ref|NC_010547.1|:120448-121086_hypothetical_protein_cce_4883_[Cyanothece_sp._ATCC_51142	si_0153x0.3xCell_Division_and_Cell_CyclexUnclassified_cell_division_and_cell_cyclexBacterial_Cytoskeleton
172054948	ALLTEPGIEDK	ref|NC_010547.1|:c100208-99174_putative_periplasmic_solute_binding_protein_for_ABC_transport_system_[Cyanothece_sp._ATCC_51142	si_0530x1xMembrane_TransportxUnclassified_membrane_transportxTransport_of_Zinc
172054948	ALLTEPGIEDKR	ref|NC_010547.1|:c100208-99174_putative_periplasmic_solute_binding_protein_for_ABC_transport_system_[Cyanothece_sp._ATCC_51142	si_0530x1xMembrane_TransportxUnclassified_membrane_transportxTransport_of_Zinc
172054948	IVTTFLPVHLFTK	ref|NC_010547.1|:c100208-99174_putative_periplasmic_solute_binding_protein_for_ABC_transport_system_[Cyanothece_sp._ATCC_51142	si_0530x1xMembrane_TransportxUnclassified_membrane_transportxTransport_of_Zinc
172054948	LIEIDPSNADSYR	ref|NC_010547.1|:c100208-99174_putative_periplasmic_solute_binding_protein_for_ABC_transport_system_[Cyanothece_sp._ATCC_51142	si_0530x1xMembrane_TransportxUnclassified_membrane_transportxTransport_of_Zinc
172054948	SNAQAYIEQLQQLDNEFK	ref|NC_010547.1|:c100208-99174_putative_periplasmic_solute_binding_protein_for_ABC_transport_system_[Cyanothece_sp._ATCC_51142	si_0530x1xMembrane_TransportxUnclassified_membrane_transportxTransport_of_Zinc
172054934	TTLLNHILTNQEGIK	ref|NC_010547.1|:87083-88174_hypothetical_protein_cce_4848_[Cyanothece_sp._ATCC_51142	si_0012x0.1xAmino_Acids_and_DerivativesxArginine;_urea_cycle,_polyaminesxUrea_decomposition
172054928	SLGNFTTIR	ref|NC_010547.1|:c81557-80097_cysteinyl-tRNA_synthetase_[Cyanothece_sp._ATCC_51142	si_0042x0.1xAmino_Acids_and_DerivativesxLysine,_threonine,_methionine,_and_cysteinexMethionine_Biosynthesis
172054923	DATPEAIKPLLDKEIEGFGEIFR	ref|NC_010547.1|:76169-76687_molybdenum_cofactor_biosynthesis_protein_B_[Cyanothece_sp._ATCC_51142	si_0365x1xCofactors,_Vitamins,_Prosthetic_Groups,_PigmentsxFolate_and_pterinesxMolybdenum_cofactor_biosynthesis
172054923	IAVLTVSDTRTEADDKSGK	ref|NC_010547.1|:76169-76687_molybdenum_cofactor_biosynthesis_protein_B_[Cyanothece_sp._ATCC_51142	si_0365x1xCofactors,_Vitamins,_Prosthetic_Groups,_PigmentsxFolate_and_pterinesxMolybdenum_cofactor_biosynthesis
172054923	ILVDNLTATGHLLAEK	ref|NC_010547.1|:76169-76687_molybdenum_cofactor_biosynthesis_protein_B_[Cyanothece_sp._ATCC_51142	si_0365x1xCofactors,_Vitamins,_Prosthetic_Groups,_PigmentsxFolate_and_pterinesxMolybdenum_cofactor_biosynthesis
172054923	TIVPDNIYQIR	ref|NC_010547.1|:76169-76687_molybdenum_cofactor_biosynthesis_protein_B_[Cyanothece_sp._ATCC_51142	si_0365x1xCofactors,_Vitamins,_Prosthetic_Groups,_PigmentsxFolate_and_pterinesxMolybdenum_cofactor_biosynthesis
172054921	GDETKAQLQR	ref|NC_010547.1|:73593-75527_threonyl-tRNA_synthetase_[Cyanothece_sp._ATCC_51142	si_0689x1xProtein_MetabolismxProtein_biosynthesisxtRNA_aminoacylation,_Thr
172054913	SYVTEEQGR	ref|NC_010547.1|:65003-65215_CAB/ELIP/HLIP_family_protein_[Cyanothece_sp._ATCC_51142	si_0393x1xCofactors,_Vitamins,_Prosthetic_Groups,_PigmentsxTetrapyrrolesxHeme_and_Siroheme_Biosynthesis
172054910	ADINFPDDLRR	ref|NC_010547.1|:61517-63286_S-layer_OprB_family_carbohydrate-selective_porin_[Cyanothece_sp._ATCC_51142	si_0530x1xMembrane_TransportxUnclassified_membrane_transportxTransport_of_Zinc
172054910	DGGSEEINK	ref|NC_010547.1|:61517-63286_S-layer_OprB_family_carbohydrate-selective_porin_[Cyanothece_sp._ATCC_51142	si_0530x1xMembrane_TransportxUnclassified_membrane_transportxTransport_of_Zinc
172054910	DISPTDWAYEALR	ref|NC_010547.1|:61517-63286_S-layer_OprB_family_carbohydrate-selective_porin_[Cyanothece_sp._ATCC_51142	si_0530x1xMembrane_TransportxUnclassified_membrane_transportxTransport_of_Zinc
172054910	EGDTGAIIVGMEPWISK	ref|NC_010547.1|:61517-63286_S-layer_OprB_family_carbohydrate-selective_porin_[Cyanothece_sp._ATCC_51142	si_0530x1xMembrane_TransportxUnclassified_membrane_transportxTransport_of_Zinc
172054910	FLDGDGAFGAISAFGSR	ref|NC_010547.1|:61517-63286_S-layer_OprB_family_carbohydrate-selective_porin_[Cyanothece_sp._ATCC_51142	si_0530x1xMembrane_TransportxUnclassified_membrane_transportxTransport_of_Zinc
172054910	FVLGGWGGFTSTR	ref|NC_010547.1|:61517-63286_S-layer_OprB_family_carbohydrate-selective_porin_[Cyanothece_sp._ATCC_51142	si_0530x1xMembrane_TransportxUnclassified_membrane_transportxTransport_of_Zinc
172054910	GKLDIWNWAATLAFPDAFK	ref|NC_010547.1|:61517-63286_S-layer_OprB_family_carbohydrate-selective_porin_[Cyanothece_sp._ATCC_51142	si_0530x1xMembrane_TransportxUnclassified_membrane_transportxTransport_of_Zinc
172054910	GRLELNTTFDGNDLLYTR	ref|NC_010547.1|:61517-63286_S-layer_OprB_family_carbohydrate-selective_porin_[Cyanothece_sp._ATCC_51142	si_0530x1xMembrane_TransportxUnclassified_membrane_transportxTransport_of_Zinc
172054910	LAQEFEQELIALGAR	ref|NC_010547.1|:61517-63286_S-layer_OprB_family_carbohydrate-selective_porin_[Cyanothece_sp._ATCC_51142	si_0530x1xMembrane_TransportxUnclassified_membrane_transportxTransport_of_Zinc
172054910	LDIWNWAATLAFPDAFK	ref|NC_010547.1|:61517-63286_S-layer_OprB_family_carbohydrate-selective_porin_[Cyanothece_sp._ATCC_51142	si_0530x1xMembrane_TransportxUnclassified_membrane_transportxTransport_of_Zinc
172054910	LELNTTFDGNDLLYTR	ref|NC_010547.1|:61517-63286_S-layer_OprB_family_carbohydrate-selective_porin_[Cyanothece_sp._ATCC_51142	si_0530x1xMembrane_TransportxUnclassified_membrane_transportxTransport_of_Zinc
172054910	LIQENVAVLR	ref|NC_010547.1|:61517-63286_S-layer_OprB_family_carbohydrate-selective_porin_[Cyanothece_sp._ATCC_51142	si_0530x1xMembrane_TransportxUnclassified_membrane_transportxTransport_of_Zinc
172054910	LIQENVAVLREDIEK	ref|NC_010547.1|:61517-63286_S-layer_OprB_family_carbohydrate-selective_porin_[Cyanothece_sp._ATCC_51142	si_0530x1xMembrane_TransportxUnclassified_membrane_transportxTransport_of_Zinc
172054910	LIQENVAVLREDIEKLK	ref|NC_010547.1|:61517-63286_S-layer_OprB_family_carbohydrate-selective_porin_[Cyanothece_sp._ATCC_51142	si_0530x1xMembrane_TransportxUnclassified_membrane_transportxTransport_of_Zinc
172054910	LIQENVAVLREDIEKLKR	ref|NC_010547.1|:61517-63286_S-layer_OprB_family_carbohydrate-selective_porin_[Cyanothece_sp._ATCC_51142	si_0530x1xMembrane_TransportxUnclassified_membrane_transportxTransport_of_Zinc
172054910	LRGLVERYGCIVGYPDR	ref|NC_010547.1|:61517-63286_S-layer_OprB_family_carbohydrate-selective_porin_[Cyanothece_sp._ATCC_51142	si_0530x1xMembrane_TransportxUnclassified_membrane_transportxTransport_of_Zinc
172054910	LTGEFVVGLTGITSGER	ref|NC_010547.1|:61517-63286_S-layer_OprB_family_carbohydrate-selective_porin_[Cyanothece_sp._ATCC_51142	si_0530x1xMembrane_TransportxUnclassified_membrane_transportxTransport_of_Zinc
172054910	NPIYYMGEGPGIGFQGR	ref|NC_010547.1|:61517-63286_S-layer_OprB_family_carbohydrate-selective_porin_[Cyanothece_sp._ATCC_51142	si_0530x1xMembrane_TransportxUnclassified_membrane_transportxTransport_of_Zinc
172054910	SNFQTFVEEEFEQSVNTVNNSYGVEFTWR	ref|NC_010547.1|:61517-63286_S-layer_OprB_family_carbohydrate-selective_porin_[Cyanothece_sp._ATCC_51142	si_0530x1xMembrane_TransportxUnclassified_membrane_transportxTransport_of_Zinc
172054910	TLNAIDAGDEFDVIQR	ref|NC_010547.1|:61517-63286_S-layer_OprB_family_carbohydrate-selective_porin_[Cyanothece_sp._ATCC_51142	si_0530x1xMembrane_TransportxUnclassified_membrane_transportxTransport_of_Zinc
172054910	VAFTYVHGYNNLDSGTGTLR	ref|NC_010547.1|:61517-63286_S-layer_OprB_family_carbohydrate-selective_porin_[Cyanothece_sp._ATCC_51142	si_0530x1xMembrane_TransportxUnclassified_membrane_transportxTransport_of_Zinc
172054899	SANEKHPNGLANSSDQVGR	ref|NC_010547.1|:c51517-50006_hypothetical_protein_cce_4812_[Cyanothece_sp._ATCC_51142	si_0106x0.5xCarbohydratesxMonosaccharidesxD-gluconate_and_ketogluconates_metabolism
172054897	TFGLHWTGQT	ref|NC_010547.1|:c49498-48815_hypothetical_protein_cce_4810_[Cyanothece_sp._ATCC_51142
172054896	FGDEIMLTAWGAR	ref|NC_010547.1|:c48617-47265_hypothetical_protein_cce_4809_[Cyanothece_sp._ATCC_51142	si_0962x1xNo_Function_MatchxNo_Function_MatchxNone
172054896	ILEQYPVTPTR	ref|NC_010547.1|:c48617-47265_hypothetical_protein_cce_4809_[Cyanothece_sp._ATCC_51142	si_0962x1xNo_Function_MatchxNo_Function_MatchxNone
172054896	LAIEFELPIYR	ref|NC_010547.1|:c48617-47265_hypothetical_protein_cce_4809_[Cyanothece_sp._ATCC_51142	si_0962x1xNo_Function_MatchxNo_Function_MatchxNone
172054896	LGTNSNSYK	ref|NC_010547.1|:c48617-47265_hypothetical_protein_cce_4809_[Cyanothece_sp._ATCC_51142	si_0962x1xNo_Function_MatchxNo_Function_MatchxNone
172054896	LNPNLVPTADPTR	ref|NC_010547.1|:c48617-47265_hypothetical_protein_cce_4809_[Cyanothece_sp._ATCC_51142	si_0962x1xNo_Function_MatchxNo_Function_MatchxNone
172054896	LTGLYQVLNENR	ref|NC_010547.1|:c48617-47265_hypothetical_protein_cce_4809_[Cyanothece_sp._ATCC_51142	si_0962x1xNo_Function_MatchxNo_Function_MatchxNone
172054896	VGVDDISNEK	ref|NC_010547.1|:c48617-47265_hypothetical_protein_cce_4809_[Cyanothece_sp._ATCC_51142	si_0962x1xNo_Function_MatchxNo_Function_MatchxNone
172054896	YMLMEMDGSR	ref|NC_010547.1|:c48617-47265_hypothetical_protein_cce_4809_[Cyanothece_sp._ATCC_51142	si_0962x1xNo_Function_MatchxNo_Function_MatchxNone
172054890	VSGASGFAVGGLAFGPNGN	ref|NC_010547.1|:c38226-37195_hypothetical_protein_cce_4803_[Cyanothece_sp._ATCC_51142	si_0962x1xNo_Function_MatchxNo_Function_MatchxNone
172054879	AIIAGKDALLEEKDVHLAFLEDELKAVR	ref|NC_010547.1|:16782-18557_hypothetical_protein_cce_4792_[Cyanothece_sp._ATCC_51142	si_0962x1xNo_Function_MatchxNo_Function_MatchxNone
172054879	DSGYTVSSQVLQAR	ref|NC_010547.1|:16782-18557_hypothetical_protein_cce_4792_[Cyanothece_sp._ATCC_51142	si_0962x1xNo_Function_MatchxNo_Function_MatchxNone
172054867	LAVLMADREIDYKELAQLTGFHEK	ref|NC_010547.1|:c10286-10011_hypothetical_protein_cce_4780_[Cyanothece_sp._ATCC_51142	si_0962x1xNo_Function_MatchxNo_Function_MatchxNone
172054859	DNETLTEQEYNELLQLTSLFEDHQAK	ref|NC_010547.1|:2850-3251_hypothetical_protein_cce_4772_[Cyanothece_sp._ATCC_51142
172039676	LGTRTDREQTIADKIDSVNSNLTGI	ref|NC_010546.1|:4930564-4930872_hypothetical_protein_cce_4763_[Cyanothece_sp._ATCC_51142	si_0962x1xNo_Function_MatchxNo_Function_MatchxNone
172039673	AQQIFSSDIFR	ref|NC_010546.1|:4927539-4928486_NAD(P)H-dependent_glycerol-3-phosphate_dehydrogenase_[Cyanothece_sp._ATCC_51142	si_0140x0.5xCarbohydratesxSugar_alcoholsxGlycerol_and_Glycerol-3-phosphate_Uptake_and_Utilization
172039673	DLKAEFDDLDFA	ref|NC_010546.1|:4927539-4928486_NAD(P)H-dependent_glycerol-3-phosphate_dehydrogenase_[Cyanothece_sp._ATCC_51142	si_0140x0.5xCarbohydratesxSugar_alcoholsxGlycerol_and_Glycerol-3-phosphate_Uptake_and_Utilization
172039673	EIEKGLPAATVVASDNVMAAGK	ref|NC_010546.1|:4927539-4928486_NAD(P)H-dependent_glycerol-3-phosphate_dehydrogenase_[Cyanothece_sp._ATCC_51142	si_0140x0.5xCarbohydratesxSugar_alcoholsxGlycerol_and_Glycerol-3-phosphate_Uptake_and_Utilization
172039673	ESFPHHPVVVLSGPNLSK	ref|NC_010546.1|:4927539-4928486_NAD(P)H-dependent_glycerol-3-phosphate_dehydrogenase_[Cyanothece_sp._ATCC_51142	si_0140x0.5xCarbohydratesxSugar_alcoholsxGlycerol_and_Glycerol-3-phosphate_Uptake_and_Utilization
172039673	ESFPHHPVVVLSGPNLSKEIEK	ref|NC_010546.1|:4927539-4928486_NAD(P)H-dependent_glycerol-3-phosphate_dehydrogenase_[Cyanothece_sp._ATCC_51142	si_0140x0.5xCarbohydratesxSugar_alcoholsxGlycerol_and_Glycerol-3-phosphate_Uptake_and_Utilization
172039673	ESFPHHPVVVLSGPNLSKEIEKGLPAATVVASDNVMAAGK	ref|NC_010546.1|:4927539-4928486_NAD(P)H-dependent_glycerol-3-phosphate_dehydrogenase_[Cyanothece_sp._ATCC_51142	si_0140x0.5xCarbohydratesxSugar_alcoholsxGlycerol_and_Glycerol-3-phosphate_Uptake_and_Utilization
172039673	ETIFITATK	ref|NC_010546.1|:4927539-4928486_NAD(P)H-dependent_glycerol-3-phosphate_dehydrogenase_[Cyanothece_sp._ATCC_51142	si_0140x0.5xCarbohydratesxSugar_alcoholsxGlycerol_and_Glycerol-3-phosphate_Uptake_and_Utilization
172039673	GLPAATVVASDNVMAAGK	ref|NC_010546.1|:4927539-4928486_NAD(P)H-dependent_glycerol-3-phosphate_dehydrogenase_[Cyanothece_sp._ATCC_51142	si_0140x0.5xCarbohydratesxSugar_alcoholsxGlycerol_and_Glycerol-3-phosphate_Uptake_and_Utilization
172039673	LAKYNTQNNVR	ref|NC_010546.1|:4927539-4928486_NAD(P)H-dependent_glycerol-3-phosphate_dehydrogenase_[Cyanothece_sp._ATCC_51142	si_0140x0.5xCarbohydratesxSugar_alcoholsxGlycerol_and_Glycerol-3-phosphate_Uptake_and_Utilization
172039673	LINGKTTPQEAVKELMAR	ref|NC_010546.1|:4927539-4928486_NAD(P)H-dependent_glycerol-3-phosphate_dehydrogenase_[Cyanothece_sp._ATCC_51142	si_0140x0.5xCarbohydratesxSugar_alcoholsxGlycerol_and_Glycerol-3-phosphate_Uptake_and_Utilization
172039673	LTALNIPKETIFITATK	ref|NC_010546.1|:4927539-4928486_NAD(P)H-dependent_glycerol-3-phosphate_dehydrogenase_[Cyanothece_sp._ATCC_51142	si_0140x0.5xCarbohydratesxSugar_alcoholsxGlycerol_and_Glycerol-3-phosphate_Uptake_and_Utilization
172039673	LTALNIPKETIFITATKGLEPK	ref|NC_010546.1|:4927539-4928486_NAD(P)H-dependent_glycerol-3-phosphate_dehydrogenase_[Cyanothece_sp._ATCC_51142	si_0140x0.5xCarbohydratesxSugar_alcoholsxGlycerol_and_Glycerol-3-phosphate_Uptake_and_Utilization
172039673	NYRVGYGLSEGK	ref|NC_010546.1|:4927539-4928486_NAD(P)H-dependent_glycerol-3-phosphate_dehydrogenase_[Cyanothece_sp._ATCC_51142	si_0140x0.5xCarbohydratesxSugar_alcoholsxGlycerol_and_Glycerol-3-phosphate_Uptake_and_Utilization
172039673	NYRVGYGLSEGKSLEQILEELQSTAEGVNTANVLVELAKK	ref|NC_010546.1|:4927539-4928486_NAD(P)H-dependent_glycerol-3-phosphate_dehydrogenase_[Cyanothece_sp._ATCC_51142	si_0140x0.5xCarbohydratesxSugar_alcoholsxGlycerol_and_Glycerol-3-phosphate_Uptake_and_Utilization
172039673	RSSESLESVVQEADVVLSAVSMK	ref|NC_010546.1|:4927539-4928486_NAD(P)H-dependent_glycerol-3-phosphate_dehydrogenase_[Cyanothece_sp._ATCC_51142	si_0140x0.5xCarbohydratesxSugar_alcoholsxGlycerol_and_Glycerol-3-phosphate_Uptake_and_Utilization
172039673	RSSESLESVVQEADVVLSAVSMKGVRPTIEK	ref|NC_010546.1|:4927539-4928486_NAD(P)H-dependent_glycerol-3-phosphate_dehydrogenase_[Cyanothece_sp._ATCC_51142	si_0140x0.5xCarbohydratesxSugar_alcoholsxGlycerol_and_Glycerol-3-phosphate_Uptake_and_Utilization
172039673	SLEQILEELQSTAEGVNTANVLVELAK	ref|NC_010546.1|:4927539-4928486_NAD(P)H-dependent_glycerol-3-phosphate_dehydrogenase_[Cyanothece_sp._ATCC_51142	si_0140x0.5xCarbohydratesxSugar_alcoholsxGlycerol_and_Glycerol-3-phosphate_Uptake_and_Utilization
172039673	SLEQILEELQSTAEGVNTANVLVELAKK	ref|NC_010546.1|:4927539-4928486_NAD(P)H-dependent_glycerol-3-phosphate_dehydrogenase_[Cyanothece_sp._ATCC_51142	si_0140x0.5xCarbohydratesxSugar_alcoholsxGlycerol_and_Glycerol-3-phosphate_Uptake_and_Utilization
172039673	SNQTINLTIIGAGLWGQALAK	ref|NC_010546.1|:4927539-4928486_NAD(P)H-dependent_glycerol-3-phosphate_dehydrogenase_[Cyanothece_sp._ATCC_51142	si_0140x0.5xCarbohydratesxSugar_alcoholsxGlycerol_and_Glycerol-3-phosphate_Uptake_and_Utilization
172039673	SSESLESVVQEADVVLSAVSMK	ref|NC_010546.1|:4927539-4928486_NAD(P)H-dependent_glycerol-3-phosphate_dehydrogenase_[Cyanothece_sp._ATCC_51142	si_0140x0.5xCarbohydratesxSugar_alcoholsxGlycerol_and_Glycerol-3-phosphate_Uptake_and_Utilization
172039673	TTLTPSQIWK	ref|NC_010546.1|:4927539-4928486_NAD(P)H-dependent_glycerol-3-phosphate_dehydrogenase_[Cyanothece_sp._ATCC_51142	si_0140x0.5xCarbohydratesxSugar_alcoholsxGlycerol_and_Glycerol-3-phosphate_Uptake_and_Utilization
172039673	TTPQEAVKELMAR	ref|NC_010546.1|:4927539-4928486_NAD(P)H-dependent_glycerol-3-phosphate_dehydrogenase_[Cyanothece_sp._ATCC_51142	si_0140x0.5xCarbohydratesxSugar_alcoholsxGlycerol_and_Glycerol-3-phosphate_Uptake_and_Utilization
172039673	VGYGLSEGK	ref|NC_010546.1|:4927539-4928486_NAD(P)H-dependent_glycerol-3-phosphate_dehydrogenase_[Cyanothece_sp._ATCC_51142	si_0140x0.5xCarbohydratesxSugar_alcoholsxGlycerol_and_Glycerol-3-phosphate_Uptake_and_Utilization
172039673	VGYGLSEGKSLEQILEELQSTAEGVNTANVLVELAK	ref|NC_010546.1|:4927539-4928486_NAD(P)H-dependent_glycerol-3-phosphate_dehydrogenase_[Cyanothece_sp._ATCC_51142	si_0140x0.5xCarbohydratesxSugar_alcoholsxGlycerol_and_Glycerol-3-phosphate_Uptake_and_Utilization
172039673	VGYGLSEGKSLEQILEELQSTAEGVNTANVLVELAKK	ref|NC_010546.1|:4927539-4928486_NAD(P)H-dependent_glycerol-3-phosphate_dehydrogenase_[Cyanothece_sp._ATCC_51142	si_0140x0.5xCarbohydratesxSugar_alcoholsxGlycerol_and_Glycerol-3-phosphate_Uptake_and_Utilization
172039673	VYFNNDPIGTELGGTLK	ref|NC_010546.1|:4927539-4928486_NAD(P)H-dependent_glycerol-3-phosphate_dehydrogenase_[Cyanothece_sp._ATCC_51142	si_0140x0.5xCarbohydratesxSugar_alcoholsxGlycerol_and_Glycerol-3-phosphate_Uptake_and_Utilization
172039671	AGLMADVLGFTGETNVQGESVK	ref|NC_010546.1|:c4925100-4924042_fructose-1,6-bisphosphatase_[Cyanothece_sp._ATCC_51142	si_0060x0.3xCarbohydratesxCO2_fixationxCalvin-Benson_cycle
172039671	AGLMADVLGFTGETNVQGESVKK	ref|NC_010546.1|:c4925100-4924042_fructose-1,6-bisphosphatase_[Cyanothece_sp._ATCC_51142	si_0060x0.3xCarbohydratesxCO2_fixationxCalvin-Benson_cycle
172039671	ASNGLKPILDVVPDKLHAR	ref|NC_010546.1|:c4925100-4924042_fructose-1,6-bisphosphatase_[Cyanothece_sp._ATCC_51142	si_0060x0.3xCarbohydratesxCO2_fixationxCalvin-Benson_cycle
172039671	EDVSLVESFIQDHQHR	ref|NC_010546.1|:c4925100-4924042_fructose-1,6-bisphosphatase_[Cyanothece_sp._ATCC_51142	si_0060x0.3xCarbohydratesxCO2_fixationxCalvin-Benson_cycle
172039671	HVLQQLQSFSPEAQDLSAIMNR	ref|NC_010546.1|:c4925100-4924042_fructose-1,6-bisphosphatase_[Cyanothece_sp._ATCC_51142	si_0060x0.3xCarbohydratesxCO2_fixationxCalvin-Benson_cycle
172039671	ILDVVPDKLHAR	ref|NC_010546.1|:c4925100-4924042_fructose-1,6-bisphosphatase_[Cyanothece_sp._ATCC_51142	si_0060x0.3xCarbohydratesxCO2_fixationxCalvin-Benson_cycle
172039671	ILMQGGVFLYPGTVK	ref|NC_010546.1|:c4925100-4924042_fructose-1,6-bisphosphatase_[Cyanothece_sp._ATCC_51142	si_0060x0.3xCarbohydratesxCO2_fixationxCalvin-Benson_cycle
172039671	ILMQGGVFLYPGTVKKPEGK	ref|NC_010546.1|:c4925100-4924042_fructose-1,6-bisphosphatase_[Cyanothece_sp._ATCC_51142	si_0060x0.3xCarbohydratesxCO2_fixationxCalvin-Benson_cycle
172039671	KMDVYANDVFISVFK	ref|NC_010546.1|:c4925100-4924042_fructose-1,6-bisphosphatase_[Cyanothece_sp._ATCC_51142	si_0060x0.3xCarbohydratesxCO2_fixationxCalvin-Benson_cycle
172039671	LAFLVEQAGGK	ref|NC_010546.1|:c4925100-4924042_fructose-1,6-bisphosphatase_[Cyanothece_sp._ATCC_51142	si_0060x0.3xCarbohydratesxCO2_fixationxCalvin-Benson_cycle
172039671	LLYESAPLAFLVEQAGGK	ref|NC_010546.1|:c4925100-4924042_fructose-1,6-bisphosphatase_[Cyanothece_sp._ATCC_51142	si_0060x0.3xCarbohydratesxCO2_fixationxCalvin-Benson_cycle
172039671	LLYESAPLAFLVEQAGGKASNGLKPILDVVPDKLHAR	ref|NC_010546.1|:c4925100-4924042_fructose-1,6-bisphosphatase_[Cyanothece_sp._ATCC_51142	si_0060x0.3xCarbohydratesxCO2_fixationxCalvin-Benson_cycle
172039671	LRLLYESAPLAFLVEQAGGK	ref|NC_010546.1|:c4925100-4924042_fructose-1,6-bisphosphatase_[Cyanothece_sp._ATCC_51142	si_0060x0.3xCarbohydratesxCO2_fixationxCalvin-Benson_cycle
172039671	MDVYANDVFISVFK	ref|NC_010546.1|:c4925100-4924042_fructose-1,6-bisphosphatase_[Cyanothece_sp._ATCC_51142	si_0060x0.3xCarbohydratesxCO2_fixationxCalvin-Benson_cycle
172039671	NDVFISVFK	ref|NC_010546.1|:c4925100-4924042_fructose-1,6-bisphosphatase_[Cyanothece_sp._ATCC_51142	si_0060x0.3xCarbohydratesxCO2_fixationxCalvin-Benson_cycle
172039671	SPLVIGSKEDVSLVESFIQDHQHR	ref|NC_010546.1|:c4925100-4924042_fructose-1,6-bisphosphatase_[Cyanothece_sp._ATCC_51142	si_0060x0.3xCarbohydratesxCO2_fixationxCalvin-Benson_cycle
172039671	SPLVIGSKEDVSLVESFIQDHQHRNHG	ref|NC_010546.1|:c4925100-4924042_fructose-1,6-bisphosphatase_[Cyanothece_sp._ATCC_51142	si_0060x0.3xCarbohydratesxCO2_fixationxCalvin-Benson_cycle
172039671	YSGALVGDIHR	ref|NC_010546.1|:c4925100-4924042_fructose-1,6-bisphosphatase_[Cyanothece_sp._ATCC_51142	si_0060x0.3xCarbohydratesxCO2_fixationxCalvin-Benson_cycle
172039669	LIAQQDWILLTGGR	ref|NC_010546.1|:4922366-4922977_hypothetical_protein_cce_4755_[Cyanothece_sp._ATCC_51142	si_0962x1xNo_Function_MatchxNo_Function_MatchxNone
172039669	NVGVMDAANKGAK	ref|NC_010546.1|:4922366-4922977_hypothetical_protein_cce_4755_[Cyanothece_sp._ATCC_51142	si_0962x1xNo_Function_MatchxNo_Function_MatchxNone
172039669	NVSDAVDIAILTDLGNAR	ref|NC_010546.1|:4922366-4922977_hypothetical_protein_cce_4755_[Cyanothece_sp._ATCC_51142	si_0962x1xNo_Function_MatchxNo_Function_MatchxNone
172039664	DTLVASQAANHSK	ref|NC_010546.1|:c4917870-4915573_two-component_hybrid_sensor_and_regulator_[Cyanothece_sp._ATCC_51142	si_0155x0.1xCell_Division_and_Cell_CyclexUnclassified_cell_division_and_cell_cyclexCyanobacterial_Circadian_Clock
172039664	LPNQPQNQYK	ref|NC_010546.1|:c4917870-4915573_two-component_hybrid_sensor_and_regulator_[Cyanothece_sp._ATCC_51142	si_0155x0.1xCell_Division_and_Cell_CyclexUnclassified_cell_division_and_cell_cyclexCyanobacterial_Circadian_Clock
172039663	ALNYGAYSVVVGTAITGIDLK	ref|NC_010546.1|:c4915533-4914865_N-acetylmannosamine-6-phosphate_2-epimerase_[Cyanothece_sp._ATCC_51142	si_0032x0.3xAmino_Acids_and_DerivativesxGlutamine,_glutamate,_aspartate,_asparagine;_ammonia_assimilationxGlutamine,_Glutamate,_Aspartate_and_Asparagine_Biosynthesis
172039663	ELPHIPIIGLWK	ref|NC_010546.1|:c4915533-4914865_N-acetylmannosamine-6-phosphate_2-epimerase_[Cyanothece_sp._ATCC_51142	si_0032x0.3xAmino_Acids_and_DerivativesxGlutamine,_glutamate,_aspartate,_asparagine;_ammonia_assimilationxGlutamine,_Glutamate,_Aspartate_and_Asparagine_Biosynthesis
172039663	ETENFNPPGFSLLEEMSQK	ref|NC_010546.1|:c4915533-4914865_N-acetylmannosamine-6-phosphate_2-epimerase_[Cyanothece_sp._ATCC_51142	si_0032x0.3xAmino_Acids_and_DerivativesxGlutamine,_glutamate,_aspartate,_asparagine;_ammonia_assimilationxGlutamine,_Glutamate,_Aspartate_and_Asparagine_Biosynthesis
172039663	ETENFNPPGFSLLEEMSQKLTVPIIAEGGISTPEDAKR	ref|NC_010546.1|:c4915533-4914865_N-acetylmannosamine-6-phosphate_2-epimerase_[Cyanothece_sp._ATCC_51142	si_0032x0.3xAmino_Acids_and_DerivativesxGlutamine,_glutamate,_aspartate,_asparagine;_ammonia_assimilationxGlutamine,_Glutamate,_Aspartate_and_Asparagine_Biosynthesis
172039663	INTPDHVK	ref|NC_010546.1|:c4915533-4914865_N-acetylmannosamine-6-phosphate_2-epimerase_[Cyanothece_sp._ATCC_51142	si_0032x0.3xAmino_Acids_and_DerivativesxGlutamine,_glutamate,_aspartate,_asparagine;_ammonia_assimilationxGlutamine,_Glutamate,_Aspartate_and_Asparagine_Biosynthesis
172039663	KELPHIPIIGLWK	ref|NC_010546.1|:c4915533-4914865_N-acetylmannosamine-6-phosphate_2-epimerase_[Cyanothece_sp._ATCC_51142	si_0032x0.3xAmino_Acids_and_DerivativesxGlutamine,_glutamate,_aspartate,_asparagine;_ammonia_assimilationxGlutamine,_Glutamate,_Aspartate_and_Asparagine_Biosynthesis
172039663	LTVPIIAEGGISTPEDAKR	ref|NC_010546.1|:c4915533-4914865_N-acetylmannosamine-6-phosphate_2-epimerase_[Cyanothece_sp._ATCC_51142	si_0032x0.3xAmino_Acids_and_DerivativesxGlutamine,_glutamate,_aspartate,_asparagine;_ammonia_assimilationxGlutamine,_Glutamate,_Aspartate_and_Asparagine_Biosynthesis
172039663	RPQGEQLADLIHNIQQK	ref|NC_010546.1|:c4915533-4914865_N-acetylmannosamine-6-phosphate_2-epimerase_[Cyanothece_sp._ATCC_51142	si_0032x0.3xAmino_Acids_and_DerivativesxGlutamine,_glutamate,_aspartate,_asparagine;_ammonia_assimilationxGlutamine,_Glutamate,_Aspartate_and_Asparagine_Biosynthesis
172039663	VKAFQAMFK	ref|NC_010546.1|:c4915533-4914865_N-acetylmannosamine-6-phosphate_2-epimerase_[Cyanothece_sp._ATCC_51142	si_0032x0.3xAmino_Acids_and_DerivativesxGlutamine,_glutamate,_aspartate,_asparagine;_ammonia_assimilationxGlutamine,_Glutamate,_Aspartate_and_Asparagine_Biosynthesis
172039660	EIIVVDSHSQDGTQELVK	ref|NC_010546.1|:c4913181-4911970_hypothetical_protein_cce_4747_[Cyanothece_sp._ATCC_51142	si_0456x1xFatty_Acids,_Lipids,_and_IsoprenoidsxIsoprenoidsxMyxoxanthophyll_biosynthesis_in_Cyanobacteria
172039660	VAEEEGYDIVSLSPQFILK	ref|NC_010546.1|:c4913181-4911970_hypothetical_protein_cce_4747_[Cyanothece_sp._ATCC_51142	si_0456x1xFatty_Acids,_Lipids,_and_IsoprenoidsxIsoprenoidsxMyxoxanthophyll_biosynthesis_in_Cyanobacteria
172039660	VSVVVPTLNEAER	ref|NC_010546.1|:c4913181-4911970_hypothetical_protein_cce_4747_[Cyanothece_sp._ATCC_51142	si_0456x1xFatty_Acids,_Lipids,_and_IsoprenoidsxIsoprenoidsxMyxoxanthophyll_biosynthesis_in_Cyanobacteria
172039657	DLSQNPEEYK	ref|NC_010546.1|:4908953-4909777_hypothetical_protein_cce_4744_[Cyanothece_sp._ATCC_51142	si_0962x1xNo_Function_MatchxNo_Function_MatchxNone
172039657	DLSQNPEEYKK	ref|NC_010546.1|:4908953-4909777_hypothetical_protein_cce_4744_[Cyanothece_sp._ATCC_51142	si_0962x1xNo_Function_MatchxNo_Function_MatchxNone
172039657	DLSQNPEEYKKR	ref|NC_010546.1|:4908953-4909777_hypothetical_protein_cce_4744_[Cyanothece_sp._ATCC_51142	si_0962x1xNo_Function_MatchxNo_Function_MatchxNone
172039657	DLSQNPEEYKKRTEELKNQLETQLLER	ref|NC_010546.1|:4908953-4909777_hypothetical_protein_cce_4744_[Cyanothece_sp._ATCC_51142	si_0962x1xNo_Function_MatchxNo_Function_MatchxNone
172039657	IQQGAGQGAEQIQQFLTQVDTLSR	ref|NC_010546.1|:4908953-4909777_hypothetical_protein_cce_4744_[Cyanothece_sp._ATCC_51142	si_0962x1xNo_Function_MatchxNo_Function_MatchxNone
172039657	IQQGAGQGAEQIQQFLTQVDTLSRNPNQLNQQIQR	ref|NC_010546.1|:4908953-4909777_hypothetical_protein_cce_4744_[Cyanothece_sp._ATCC_51142	si_0962x1xNo_Function_MatchxNo_Function_MatchxNone
172039657	LNQAIEAGQVQGR	ref|NC_010546.1|:4908953-4909777_hypothetical_protein_cce_4744_[Cyanothece_sp._ATCC_51142	si_0962x1xNo_Function_MatchxNo_Function_MatchxNone
172039657	NPNQLNQQIQR	ref|NC_010546.1|:4908953-4909777_hypothetical_protein_cce_4744_[Cyanothece_sp._ATCC_51142	si_0962x1xNo_Function_MatchxNo_Function_MatchxNone
172039657	NQLETQLLER	ref|NC_010546.1|:4908953-4909777_hypothetical_protein_cce_4744_[Cyanothece_sp._ATCC_51142	si_0962x1xNo_Function_MatchxNo_Function_MatchxNone
172039657	QAESQATTQALK	ref|NC_010546.1|:4908953-4909777_hypothetical_protein_cce_4744_[Cyanothece_sp._ATCC_51142	si_0962x1xNo_Function_MatchxNo_Function_MatchxNone
172039657	QLNAQQLETLR	ref|NC_010546.1|:4908953-4909777_hypothetical_protein_cce_4744_[Cyanothece_sp._ATCC_51142	si_0962x1xNo_Function_MatchxNo_Function_MatchxNone
172039657	QLNAQQLETLRQQR	ref|NC_010546.1|:4908953-4909777_hypothetical_protein_cce_4744_[Cyanothece_sp._ATCC_51142	si_0962x1xNo_Function_MatchxNo_Function_MatchxNone
172039657	TEELKNQLETQLLER	ref|NC_010546.1|:4908953-4909777_hypothetical_protein_cce_4744_[Cyanothece_sp._ATCC_51142	si_0962x1xNo_Function_MatchxNo_Function_MatchxNone
172039656	EAWLDQVDFPSSNIHPMPTGSNDPSVDAQTHDQELR	ref|NC_010546.1|:c4908725-4907970_6-phosphogluconolactonase_[Cyanothece_sp._ATCC_51142	si_0065x0.3xCarbohydratesxCentral_carbohydrate_metabolismxEntner-Doudoroff_Pathway
172039656	FTLALAGGGTPK	ref|NC_010546.1|:c4908725-4907970_6-phosphogluconolactonase_[Cyanothece_sp._ATCC_51142	si_0065x0.3xCarbohydratesxCentral_carbohydrate_metabolismxEntner-Doudoroff_Pathway
172039656	FTLALAGGGTPKPLYEALAQQSLPLEK	ref|NC_010546.1|:c4908725-4907970_6-phosphogluconolactonase_[Cyanothece_sp._ATCC_51142	si_0065x0.3xCarbohydratesxCentral_carbohydrate_metabolismxEntner-Doudoroff_Pathway
172039656	IHIFWGDER	ref|NC_010546.1|:c4908725-4907970_6-phosphogluconolactonase_[Cyanothece_sp._ATCC_51142	si_0065x0.3xCarbohydratesxCentral_carbohydrate_metabolismxEntner-Doudoroff_Pathway
172039656	LITVGNKDGQPR	ref|NC_010546.1|:c4908725-4907970_6-phosphogluconolactonase_[Cyanothece_sp._ATCC_51142	si_0065x0.3xCarbohydratesxCentral_carbohydrate_metabolismxEntner-Doudoroff_Pathway
172039656	LTFTYPLLNHAR	ref|NC_010546.1|:c4908725-4907970_6-phosphogluconolactonase_[Cyanothece_sp._ATCC_51142	si_0065x0.3xCarbohydratesxCentral_carbohydrate_metabolismxEntner-Doudoroff_Pathway
172039656	PALAQIFSPDGDETLYPAK	ref|NC_010546.1|:c4908725-4907970_6-phosphogluconolactonase_[Cyanothece_sp._ATCC_51142	si_0065x0.3xCarbohydratesxCentral_carbohydrate_metabolismxEntner-Doudoroff_Pathway
172039656	PLYEALAQQSLPLEK	ref|NC_010546.1|:c4908725-4907970_6-phosphogluconolactonase_[Cyanothece_sp._ATCC_51142	si_0065x0.3xCarbohydratesxCentral_carbohydrate_metabolismxEntner-Doudoroff_Pathway
172039656	RPALAQIFSPDGDETLYPAK	ref|NC_010546.1|:c4908725-4907970_6-phosphogluconolactonase_[Cyanothece_sp._ATCC_51142	si_0065x0.3xCarbohydratesxCentral_carbohydrate_metabolismxEntner-Doudoroff_Pathway
172039656	TEALTVSDR	ref|NC_010546.1|:c4908725-4907970_6-phosphogluconolactonase_[Cyanothece_sp._ATCC_51142	si_0065x0.3xCarbohydratesxCentral_carbohydrate_metabolismxEntner-Doudoroff_Pathway
172039656	TEALTVSDRLITVGNK	ref|NC_010546.1|:c4908725-4907970_6-phosphogluconolactonase_[Cyanothece_sp._ATCC_51142	si_0065x0.3xCarbohydratesxCentral_carbohydrate_metabolismxEntner-Doudoroff_Pathway
172039656	TEALTVSDRLITVGNKDGQPR	ref|NC_010546.1|:c4908725-4907970_6-phosphogluconolactonase_[Cyanothece_sp._ATCC_51142	si_0065x0.3xCarbohydratesxCentral_carbohydrate_metabolismxEntner-Doudoroff_Pathway
172039656	TQIQVLSDKPTLIAHTLNLIVDK	ref|NC_010546.1|:c4908725-4907970_6-phosphogluconolactonase_[Cyanothece_sp._ATCC_51142	si_0065x0.3xCarbohydratesxCentral_carbohydrate_metabolismxEntner-Doudoroff_Pathway
172039656	TQIQVLSDKPTLIAHTLNLIVDKIHTTLQQQEK	ref|NC_010546.1|:c4908725-4907970_6-phosphogluconolactonase_[Cyanothece_sp._ATCC_51142	si_0065x0.3xCarbohydratesxCentral_carbohydrate_metabolismxEntner-Doudoroff_Pathway
172039656	YVSAAHPDSNQR	ref|NC_010546.1|:c4908725-4907970_6-phosphogluconolactonase_[Cyanothece_sp._ATCC_51142	si_0065x0.3xCarbohydratesxCentral_carbohydrate_metabolismxEntner-Doudoroff_Pathway
172039654	EYLIKEGILLR	ref|NC_010546.1|:c4907083-4905644_hypothetical_protein_cce_4741_[Cyanothece_sp._ATCC_51142	si_0311x0.5xClustering-based_subsystemsxUnclassified_clustering-based_subsystemsxCBSS-316273.3.peg.448
172039654	FDDGGNLATR	ref|NC_010546.1|:c4907083-4905644_hypothetical_protein_cce_4741_[Cyanothece_sp._ATCC_51142	si_0311x0.5xClustering-based_subsystemsxUnclassified_clustering-based_subsystemsxCBSS-316273.3.peg.448
172039654	GLGSKESQIR	ref|NC_010546.1|:c4907083-4905644_hypothetical_protein_cce_4741_[Cyanothece_sp._ATCC_51142	si_0311x0.5xClustering-based_subsystemsxUnclassified_clustering-based_subsystemsxCBSS-316273.3.peg.448
172039654	QVTETSTLR	ref|NC_010546.1|:c4907083-4905644_hypothetical_protein_cce_4741_[Cyanothece_sp._ATCC_51142	si_0311x0.5xClustering-based_subsystemsxUnclassified_clustering-based_subsystemsxCBSS-316273.3.peg.448
172039654	VNDKIVSTSAIAR	ref|NC_010546.1|:c4907083-4905644_hypothetical_protein_cce_4741_[Cyanothece_sp._ATCC_51142	si_0311x0.5xClustering-based_subsystemsxUnclassified_clustering-based_subsystemsxCBSS-316273.3.peg.448
172039653	QANVAIVEPNYGYYFHPDPEVEGDPTGQVLYQALSELNQEYGVK	ref|NC_010546.1|:c4905428-4905036_hypothetical_protein_cce_4740_[Cyanothece_sp._ATCC_51142	si_0962x1xNo_Function_MatchxNo_Function_MatchxNone
172039652	AYGEYIVITPQNIAPKPTNLTHSQAAAVPLAASTALQGLR	ref|NC_010546.1|:c4904099-4903161_putative_zinc-binding_oxidoreductase_[Cyanothece_sp._ATCC_51142	si_0100x0.3xCarbohydratesxMonosaccharidesxD-Galacturonate_and_D-Glucuronate_Utilization
172039652	YGSPDVLEYAEVTKPSPTAK	ref|NC_010546.1|:c4904099-4903161_putative_zinc-binding_oxidoreductase_[Cyanothece_sp._ATCC_51142	si_0100x0.3xCarbohydratesxMonosaccharidesxD-Galacturonate_and_D-Glucuronate_Utilization
172039651	AILTGDALFIR	ref|NC_010546.1|:c4903142-4902432_hypothetical_protein_cce_4738_[Cyanothece_sp._ATCC_51142	si_0071x0.3xCarbohydratesxCentral_carbohydrate_metabolismxMethylglyoxal_Metabolism
172039651	DRSEFITFMTNLNLPNPK	ref|NC_010546.1|:c4903142-4902432_hypothetical_protein_cce_4738_[Cyanothece_sp._ATCC_51142	si_0071x0.3xCarbohydratesxCentral_carbohydrate_metabolismxMethylglyoxal_Metabolism
172039651	GHTVSTIAEEK	ref|NC_010546.1|:c4903142-4902432_hypothetical_protein_cce_4738_[Cyanothece_sp._ATCC_51142	si_0071x0.3xCarbohydratesxCentral_carbohydrate_metabolismxMethylglyoxal_Metabolism
172039651	KAILTGDALFIR	ref|NC_010546.1|:c4903142-4902432_hypothetical_protein_cce_4738_[Cyanothece_sp._ATCC_51142	si_0071x0.3xCarbohydratesxCentral_carbohydrate_metabolismxMethylglyoxal_Metabolism
172039651	LFTLPDETLVYPGHDYR	ref|NC_010546.1|:c4903142-4902432_hypothetical_protein_cce_4738_[Cyanothece_sp._ATCC_51142	si_0071x0.3xCarbohydratesxCentral_carbohydrate_metabolismxMethylglyoxal_Metabolism
172039651	LFTLPDETLVYPGHDYRGHTVSTIAEEK	ref|NC_010546.1|:c4903142-4902432_hypothetical_protein_cce_4738_[Cyanothece_sp._ATCC_51142	si_0071x0.3xCarbohydratesxCentral_carbohydrate_metabolismxMethylglyoxal_Metabolism
172039651	LFTLPDETLVYPGHDYRGHTVSTIAEEKQYNPR	ref|NC_010546.1|:c4903142-4902432_hypothetical_protein_cce_4738_[Cyanothece_sp._ATCC_51142	si_0071x0.3xCarbohydratesxCentral_carbohydrate_metabolismxMethylglyoxal_Metabolism
172039651	QALLVDPVLEQVERDR	ref|NC_010546.1|:c4903142-4902432_hypothetical_protein_cce_4738_[Cyanothece_sp._ATCC_51142	si_0071x0.3xCarbohydratesxCentral_carbohydrate_metabolismxMethylglyoxal_Metabolism
172039651	QALLVDPVLEQVERDRQLLNELGLTLK	ref|NC_010546.1|:c4903142-4902432_hypothetical_protein_cce_4738_[Cyanothece_sp._ATCC_51142	si_0071x0.3xCarbohydratesxCentral_carbohydrate_metabolismxMethylglyoxal_Metabolism
172039651	QLFDAESSTYTYLIADR	ref|NC_010546.1|:c4903142-4902432_hypothetical_protein_cce_4738_[Cyanothece_sp._ATCC_51142	si_0071x0.3xCarbohydratesxCentral_carbohydrate_metabolismxMethylglyoxal_Metabolism
172039651	QLLNELGLTLK	ref|NC_010546.1|:c4903142-4902432_hypothetical_protein_cce_4738_[Cyanothece_sp._ATCC_51142	si_0071x0.3xCarbohydratesxCentral_carbohydrate_metabolismxMethylglyoxal_Metabolism
172039651	SEFITFMTNLNLPNPK	ref|NC_010546.1|:c4903142-4902432_hypothetical_protein_cce_4738_[Cyanothece_sp._ATCC_51142	si_0071x0.3xCarbohydratesxCentral_carbohydrate_metabolismxMethylglyoxal_Metabolism
172039651	TDFQSGDPGTLYDSVTQR	ref|NC_010546.1|:c4903142-4902432_hypothetical_protein_cce_4738_[Cyanothece_sp._ATCC_51142	si_0071x0.3xCarbohydratesxCentral_carbohydrate_metabolismxMethylglyoxal_Metabolism
172039651	TLKQALLVDPVLEQVER	ref|NC_010546.1|:c4903142-4902432_hypothetical_protein_cce_4738_[Cyanothece_sp._ATCC_51142	si_0071x0.3xCarbohydratesxCentral_carbohydrate_metabolismxMethylglyoxal_Metabolism
172039651	TLKQALLVDPVLEQVERDR	ref|NC_010546.1|:c4903142-4902432_hypothetical_protein_cce_4738_[Cyanothece_sp._ATCC_51142	si_0071x0.3xCarbohydratesxCentral_carbohydrate_metabolismxMethylglyoxal_Metabolism
172039651	TLKQALLVDPVLEQVERDRQLLNELGLTLK	ref|NC_010546.1|:c4903142-4902432_hypothetical_protein_cce_4738_[Cyanothece_sp._ATCC_51142	si_0071x0.3xCarbohydratesxCentral_carbohydrate_metabolismxMethylglyoxal_Metabolism
172039648	ATGINFEQLVDQLVQFALEK	ref|NC_010546.1|:c4900873-4899818_D-alanyl-alanine_synthetase_A_[Cyanothece_sp._ATCC_51142	si_0205x0.5xCell_Wall_and_CapsulexUnclassified_cell_wall_and_capsulexPeptidoglycan_Biosynthesis
172039648	FSMYPQLWK	ref|NC_010546.1|:c4900873-4899818_D-alanyl-alanine_synthetase_A_[Cyanothece_sp._ATCC_51142	si_0205x0.5xCell_Wall_and_CapsulexUnclassified_cell_wall_and_capsulexPeptidoglycan_Biosynthesis
172039648	IVSQIQEMAIQAFK	ref|NC_010546.1|:c4900873-4899818_D-alanyl-alanine_synthetase_A_[Cyanothece_sp._ATCC_51142	si_0205x0.5xCell_Wall_and_CapsulexUnclassified_cell_wall_and_capsulexPeptidoglycan_Biosynthesis
172039648	LCDEIEADLGYPCFVKPANLGSSVGIAK	ref|NC_010546.1|:c4900873-4899818_D-alanyl-alanine_synthetase_A_[Cyanothece_sp._ATCC_51142	si_0205x0.5xCell_Wall_and_CapsulexUnclassified_cell_wall_and_capsulexPeptidoglycan_Biosynthesis
172039648	MAFAQAGLPQVK	ref|NC_010546.1|:c4900873-4899818_D-alanyl-alanine_synthetase_A_[Cyanothece_sp._ATCC_51142	si_0205x0.5xCell_Wall_and_CapsulexUnclassified_cell_wall_and_capsulexPeptidoglycan_Biosynthesis
172039648	SHSELETALDSAASYDRR	ref|NC_010546.1|:c4900873-4899818_D-alanyl-alanine_synthetase_A_[Cyanothece_sp._ATCC_51142	si_0205x0.5xCell_Wall_and_CapsulexUnclassified_cell_wall_and_capsulexPeptidoglycan_Biosynthesis
172039648	SQIHIPANLPEK	ref|NC_010546.1|:c4900873-4899818_D-alanyl-alanine_synthetase_A_[Cyanothece_sp._ATCC_51142	si_0205x0.5xCell_Wall_and_CapsulexUnclassified_cell_wall_and_capsulexPeptidoglycan_Biosynthesis
172039648	SQIHIPANLPEKIVSQIQEMAIQAFK	ref|NC_010546.1|:c4900873-4899818_D-alanyl-alanine_synthetase_A_[Cyanothece_sp._ATCC_51142	si_0205x0.5xCell_Wall_and_CapsulexUnclassified_cell_wall_and_capsulexPeptidoglycan_Biosynthesis
172039648	TVDAAGLAR	ref|NC_010546.1|:c4900873-4899818_D-alanyl-alanine_synthetase_A_[Cyanothece_sp._ATCC_51142	si_0205x0.5xCell_Wall_and_CapsulexUnclassified_cell_wall_and_capsulexPeptidoglycan_Biosynthesis
172039645	EALIDQGIGVISLR	ref|NC_010546.1|:4896812-4899028_hypothetical_protein_cce_4732_[Cyanothece_sp._ATCC_51142	si_0962x1xNo_Function_MatchxNo_Function_MatchxNone
172039645	FTPVKLPIPLTIENLNDEEQTSAYK	ref|NC_010546.1|:4896812-4899028_hypothetical_protein_cce_4732_[Cyanothece_sp._ATCC_51142	si_0962x1xNo_Function_MatchxNo_Function_MatchxNone
172039645	FVSDNNVTDPK	ref|NC_010546.1|:4896812-4899028_hypothetical_protein_cce_4732_[Cyanothece_sp._ATCC_51142	si_0962x1xNo_Function_MatchxNo_Function_MatchxNone
172039645	FVSDNNVTDPKDR	ref|NC_010546.1|:4896812-4899028_hypothetical_protein_cce_4732_[Cyanothece_sp._ATCC_51142	si_0962x1xNo_Function_MatchxNo_Function_MatchxNone
172039645	FVSDNNVTDPKDRK	ref|NC_010546.1|:4896812-4899028_hypothetical_protein_cce_4732_[Cyanothece_sp._ATCC_51142	si_0962x1xNo_Function_MatchxNo_Function_MatchxNone
172039645	GNVFGLAGNK	ref|NC_010546.1|:4896812-4899028_hypothetical_protein_cce_4732_[Cyanothece_sp._ATCC_51142	si_0962x1xNo_Function_MatchxNo_Function_MatchxNone
172039645	GQGNDTVTNIIK	ref|NC_010546.1|:4896812-4899028_hypothetical_protein_cce_4732_[Cyanothece_sp._ATCC_51142	si_0962x1xNo_Function_MatchxNo_Function_MatchxNone
172039645	ITGLSGLEEGPYLK	ref|NC_010546.1|:4896812-4899028_hypothetical_protein_cce_4732_[Cyanothece_sp._ATCC_51142	si_0962x1xNo_Function_MatchxNo_Function_MatchxNone
172039645	SLVGIFGNNTLWYLPLHGDNK	ref|NC_010546.1|:4896812-4899028_hypothetical_protein_cce_4732_[Cyanothece_sp._ATCC_51142	si_0962x1xNo_Function_MatchxNo_Function_MatchxNone
172039645	TLGDLYIGTPEEK	ref|NC_010546.1|:4896812-4899028_hypothetical_protein_cce_4732_[Cyanothece_sp._ATCC_51142	si_0962x1xNo_Function_MatchxNo_Function_MatchxNone
172039645	VTEDQNIITFK	ref|NC_010546.1|:4896812-4899028_hypothetical_protein_cce_4732_[Cyanothece_sp._ATCC_51142	si_0962x1xNo_Function_MatchxNo_Function_MatchxNone
172039643	SVSVEDAR	ref|NC_010546.1|:4894239-4894556_hypothetical_protein_cce_4730_[Cyanothece_sp._ATCC_51142	si_0962x1xNo_Function_MatchxNo_Function_MatchxNone
172039640	ALAIPVELVPIEDLDKVLSQTK	ref|NC_010546.1|:c4891580-4890579_hypothetical_protein_cce_4727_[Cyanothece_sp._ATCC_51142	si_0962x1xNo_Function_MatchxNo_Function_MatchxNone
172039640	SATVVTSR	ref|NC_010546.1|:c4891580-4890579_hypothetical_protein_cce_4727_[Cyanothece_sp._ATCC_51142	si_0962x1xNo_Function_MatchxNo_Function_MatchxNone
172039639	GLEEIAAKELEKLGAK	ref|NC_010546.1|:c4890448-4889321_hypothetical_protein_cce_4726_[Cyanothece_sp._ATCC_51142	si_0962x1xNo_Function_MatchxNo_Function_MatchxNone
172039639	LGNSQELGSLYK	ref|NC_010546.1|:c4890448-4889321_hypothetical_protein_cce_4726_[Cyanothece_sp._ATCC_51142	si_0962x1xNo_Function_MatchxNo_Function_MatchxNone
172039639	NAEDLYNNAR	ref|NC_010546.1|:c4890448-4889321_hypothetical_protein_cce_4726_[Cyanothece_sp._ATCC_51142	si_0962x1xNo_Function_MatchxNo_Function_MatchxNone
172039639	TNQYFATVAR	ref|NC_010546.1|:c4890448-4889321_hypothetical_protein_cce_4726_[Cyanothece_sp._ATCC_51142	si_0962x1xNo_Function_MatchxNo_Function_MatchxNone
172039638	IFDQDLAVLGSWLR	ref|NC_010546.1|:4888459-4889340_sulfotransferase_[Cyanothece_sp._ATCC_51142	si_0962x1xNo_Function_MatchxNo_Function_MatchxNone
172039638	VISEEINESLDRYPELIEYSLYTK	ref|NC_010546.1|:4888459-4889340_sulfotransferase_[Cyanothece_sp._ATCC_51142	si_0962x1xNo_Function_MatchxNo_Function_MatchxNone
172039637	VLLVDNNSGDDSVPILEQAIEDYHWK	ref|NC_010546.1|:4887501-4888475_glycosyl_transferase_family_protein_[Cyanothece_sp._ATCC_51142	si_0183x1xCell_Wall_and_CapsulexCapsular_and_extracellular_polysacchridesxdTDP-rhamnose_synthesis
172039637	YHSPLSQFIDGAATGLITK	ref|NC_010546.1|:4887501-4888475_glycosyl_transferase_family_protein_[Cyanothece_sp._ATCC_51142	si_0183x1xCell_Wall_and_CapsulexCapsular_and_extracellular_polysacchridesxdTDP-rhamnose_synthesis
172039636	SQKDFTPVGK	ref|NC_010546.1|:c4887449-4886091_DNA_polymerase_III_subunit_alpha_[Cyanothece_sp._ATCC_51142	si_0319x0.3xClustering-based_subsystemsxUnclassified_clustering-based_subsystemsxCBSS-350688.3.peg.1509
172039635	LPSLLEEGEQQLVTLQALINTK	ref|NC_010546.1|:c4886059-4884962_hypothetical_protein_cce_4722_[Cyanothece_sp._ATCC_51142	si_0962x1xNo_Function_MatchxNo_Function_MatchxNone
172039635	NLPIDLEFLASQILTK	ref|NC_010546.1|:c4886059-4884962_hypothetical_protein_cce_4722_[Cyanothece_sp._ATCC_51142	si_0962x1xNo_Function_MatchxNo_Function_MatchxNone
172039635	SIINFFSPQIR	ref|NC_010546.1|:c4886059-4884962_hypothetical_protein_cce_4722_[Cyanothece_sp._ATCC_51142	si_0962x1xNo_Function_MatchxNo_Function_MatchxNone
172039633	TVDNHISNILTK	ref|NC_010546.1|:4884052-4884324_LuxR_family_transcriptional_regulator_[Cyanothece_sp._ATCC_51142	si_0962x1xNo_Function_MatchxNo_Function_MatchxNone
172039631	AGIGVDEILESIVHLVPPPSDTVDKPLR	ref|NC_010546.1|:c4883587-4881776_GTP-binding_protein_LepA_[Cyanothece_sp._ATCC_51142	si_0667x0.2xProtein_MetabolismxProtein_biosynthesisxTranslation_elongation_factor_G_family
172039631	ALTEKLKELIPR	ref|NC_010546.1|:c4883587-4881776_GTP-binding_protein_LepA_[Cyanothece_sp._ATCC_51142	si_0667x0.2xProtein_MetabolismxProtein_biosynthesisxTranslation_elongation_factor_G_family
172039631	SKDGEDYVLNLIDTPGHVDFSYEVSR	ref|NC_010546.1|:c4883587-4881776_GTP-binding_protein_LepA_[Cyanothece_sp._ATCC_51142	si_0667x0.2xProtein_MetabolismxProtein_biosynthesisxTranslation_elongation_factor_G_family
172039631	VPIQAAIGSK	ref|NC_010546.1|:c4883587-4881776_GTP-binding_protein_LepA_[Cyanothece_sp._ATCC_51142	si_0667x0.2xProtein_MetabolismxProtein_biosynthesisxTranslation_elongation_factor_G_family
172039630	APDFNNLQILPHLLK	ref|NC_010546.1|:4880369-4881553_NAD(P)H-quinone_oxidoreductase_subunit_H_[Cyanothece_sp._ATCC_51142	si_0812x1xRespirationxElectron_donating_reactionsxRespiratory_Complex_I
172039630	DEAINWGLSGPMLR	ref|NC_010546.1|:4880369-4881553_NAD(P)H-quinone_oxidoreductase_subunit_H_[Cyanothece_sp._ATCC_51142	si_0812x1xRespirationxElectron_donating_reactionsxRespiratory_Complex_I
172039630	EMIYDLWEAASGMR	ref|NC_010546.1|:4880369-4881553_NAD(P)H-quinone_oxidoreductase_subunit_H_[Cyanothece_sp._ATCC_51142	si_0812x1xRespirationxElectron_donating_reactionsxRespiratory_Complex_I
172039630	EREMIYDLWEAASGMR	ref|NC_010546.1|:4880369-4881553_NAD(P)H-quinone_oxidoreductase_subunit_H_[Cyanothece_sp._ATCC_51142	si_0812x1xRespirationxElectron_donating_reactionsxRespiratory_Complex_I
172039630	GELGIFIVGNNDVFPWR	ref|NC_010546.1|:4880369-4881553_NAD(P)H-quinone_oxidoreductase_subunit_H_[Cyanothece_sp._ATCC_51142	si_0812x1xRespirationxElectron_donating_reactionsxRespiratory_Complex_I
172039630	GIPGGPYENLEAK	ref|NC_010546.1|:4880369-4881553_NAD(P)H-quinone_oxidoreductase_subunit_H_[Cyanothece_sp._ATCC_51142	si_0812x1xRespirationxElectron_donating_reactionsxRespiratory_Complex_I
172039630	GIPGGPYENLEAKR	ref|NC_010546.1|:4880369-4881553_NAD(P)H-quinone_oxidoreductase_subunit_H_[Cyanothece_sp._ATCC_51142	si_0812x1xRespirationxElectron_donating_reactionsxRespiratory_Complex_I
172039630	GSGVQWDLR	ref|NC_010546.1|:4880369-4881553_NAD(P)H-quinone_oxidoreductase_subunit_H_[Cyanothece_sp._ATCC_51142	si_0812x1xRespirationxElectron_donating_reactionsxRespiratory_Complex_I
172039630	IPEGEHYVR	ref|NC_010546.1|:4880369-4881553_NAD(P)H-quinone_oxidoreductase_subunit_H_[Cyanothece_sp._ATCC_51142	si_0812x1xRespirationxElectron_donating_reactionsxRespiratory_Complex_I
172039630	IRAPDFNNLQILPHLLK	ref|NC_010546.1|:4880369-4881553_NAD(P)H-quinone_oxidoreductase_subunit_H_[Cyanothece_sp._ATCC_51142	si_0812x1xRespirationxElectron_donating_reactionsxRespiratory_Complex_I
172039630	KSEWNDFEYQYIAK	ref|NC_010546.1|:4880369-4881553_NAD(P)H-quinone_oxidoreductase_subunit_H_[Cyanothece_sp._ATCC_51142	si_0812x1xRespirationxElectron_donating_reactionsxRespiratory_Complex_I
172039630	KSEWNDFEYQYIAKK	ref|NC_010546.1|:4880369-4881553_NAD(P)H-quinone_oxidoreductase_subunit_H_[Cyanothece_sp._ATCC_51142	si_0812x1xRespirationxElectron_donating_reactionsxRespiratory_Complex_I
172039630	LITNNPIFR	ref|NC_010546.1|:4880369-4881553_NAD(P)H-quinone_oxidoreductase_subunit_H_[Cyanothece_sp._ATCC_51142	si_0812x1xRespirationxElectron_donating_reactionsxRespiratory_Complex_I
172039630	MESGKGELGIFIVGNNDVFPWR	ref|NC_010546.1|:4880369-4881553_NAD(P)H-quinone_oxidoreductase_subunit_H_[Cyanothece_sp._ATCC_51142	si_0812x1xRespirationxElectron_donating_reactionsxRespiratory_Complex_I
172039630	QALKGIPGGPYENLEAKR	ref|NC_010546.1|:4880369-4881553_NAD(P)H-quinone_oxidoreductase_subunit_H_[Cyanothece_sp._ATCC_51142	si_0812x1xRespirationxElectron_donating_reactionsxRespiratory_Complex_I
172039630	RVEGVGTITRDEAINWGLSGPMLR	ref|NC_010546.1|:4880369-4881553_NAD(P)H-quinone_oxidoreductase_subunit_H_[Cyanothece_sp._ATCC_51142	si_0812x1xRespirationxElectron_donating_reactionsxRespiratory_Complex_I
172039630	SEWNDFEYQYIAK	ref|NC_010546.1|:4880369-4881553_NAD(P)H-quinone_oxidoreductase_subunit_H_[Cyanothece_sp._ATCC_51142	si_0812x1xRespirationxElectron_donating_reactionsxRespiratory_Complex_I
172039630	TNIMYVPYVSR	ref|NC_010546.1|:4880369-4881553_NAD(P)H-quinone_oxidoreductase_subunit_H_[Cyanothece_sp._ATCC_51142	si_0812x1xRespirationxElectron_donating_reactionsxRespiratory_Complex_I
172039630	VADIMAILGSIDIIMGSVDR	ref|NC_010546.1|:4880369-4881553_NAD(P)H-quinone_oxidoreductase_subunit_H_[Cyanothece_sp._ATCC_51142	si_0812x1xRespirationxElectron_donating_reactionsxRespiratory_Complex_I
172039630	VAPTFKIPEGEHYVR	ref|NC_010546.1|:4880369-4881553_NAD(P)H-quinone_oxidoreductase_subunit_H_[Cyanothece_sp._ATCC_51142	si_0812x1xRespirationxElectron_donating_reactionsxRespiratory_Complex_I
172039630	VDEYEKLITNNPIFR	ref|NC_010546.1|:4880369-4881553_NAD(P)H-quinone_oxidoreductase_subunit_H_[Cyanothece_sp._ATCC_51142	si_0812x1xRespirationxElectron_donating_reactionsxRespiratory_Complex_I
172039630	VEGVGTITR	ref|NC_010546.1|:4880369-4881553_NAD(P)H-quinone_oxidoreductase_subunit_H_[Cyanothece_sp._ATCC_51142	si_0812x1xRespirationxElectron_donating_reactionsxRespiratory_Complex_I
172039630	VEGVGTITRDEAINWGLSGPMLR	ref|NC_010546.1|:4880369-4881553_NAD(P)H-quinone_oxidoreductase_subunit_H_[Cyanothece_sp._ATCC_51142	si_0812x1xRespirationxElectron_donating_reactionsxRespiratory_Complex_I
172039630	VGGVAVDLPYGWIDK	ref|NC_010546.1|:4880369-4881553_NAD(P)H-quinone_oxidoreductase_subunit_H_[Cyanothece_sp._ATCC_51142	si_0812x1xRespirationxElectron_donating_reactionsxRespiratory_Complex_I
172039630	VGGVAVDLPYGWIDKCEDFCDAFDPK	ref|NC_010546.1|:4880369-4881553_NAD(P)H-quinone_oxidoreductase_subunit_H_[Cyanothece_sp._ATCC_51142	si_0812x1xRespirationxElectron_donating_reactionsxRespiratory_Complex_I
172039630	VGGVAVDLPYGWIDKCEDFCDAFDPKVDEYEK	ref|NC_010546.1|:4880369-4881553_NAD(P)H-quinone_oxidoreductase_subunit_H_[Cyanothece_sp._ATCC_51142	si_0812x1xRespirationxElectron_donating_reactionsxRespiratory_Complex_I
172039630	VGGVAVDLPYGWIDKCEDFCDAFDPKVDEYEKLITNNPIFR	ref|NC_010546.1|:4880369-4881553_NAD(P)H-quinone_oxidoreductase_subunit_H_[Cyanothece_sp._ATCC_51142	si_0812x1xRespirationxElectron_donating_reactionsxRespiratory_Complex_I
172039630	VGGVAVDLPYGWIDKCEDFCDAFDPKVDEYEKLITNNPIFRR	ref|NC_010546.1|:4880369-4881553_NAD(P)H-quinone_oxidoreductase_subunit_H_[Cyanothece_sp._ATCC_51142	si_0812x1xRespirationxElectron_donating_reactionsxRespiratory_Complex_I
172039630	WDYAAGMFNEAITVNAPEQLADIEVPK	ref|NC_010546.1|:4880369-4881553_NAD(P)H-quinone_oxidoreductase_subunit_H_[Cyanothece_sp._ATCC_51142	si_0812x1xRespirationxElectron_donating_reactionsxRespiratory_Complex_I
172039630	WDYAAGMFNEAITVNAPEQLADIEVPKR	ref|NC_010546.1|:4880369-4881553_NAD(P)H-quinone_oxidoreductase_subunit_H_[Cyanothece_sp._ATCC_51142	si_0812x1xRespirationxElectron_donating_reactionsxRespiratory_Complex_I
172039629	ATLVAGTAGSSK	ref|NC_010546.1|:4878729-4880243_circadian_clock_protein_KaiC_[Cyanothece_sp._ATCC_51142	si_0155x0.5xCell_Division_and_Cell_CyclexUnclassified_cell_division_and_cell_cyclexCyanobacterial_Circadian_Clock
172039629	DSIILVSGATGTGK	ref|NC_010546.1|:4878729-4880243_circadian_clock_protein_KaiC_[Cyanothece_sp._ATCC_51142	si_0155x0.5xCell_Division_and_Cell_CyclexUnclassified_cell_division_and_cell_cyclexCyanobacterial_Circadian_Clock
172039629	FGVEEFVADNVVILR	ref|NC_010546.1|:4878729-4880243_circadian_clock_protein_KaiC_[Cyanothece_sp._ATCC_51142	si_0155x0.5xCell_Division_and_Cell_CyclexUnclassified_cell_division_and_cell_cyclexCyanobacterial_Circadian_Clock
172039629	GFGWNIAQWELERK	ref|NC_010546.1|:4878729-4880243_circadian_clock_protein_KaiC_[Cyanothece_sp._ATCC_51142	si_0155x0.5xCell_Division_and_Cell_CyclexUnclassified_cell_division_and_cell_cyclexCyanobacterial_Circadian_Clock
172039629	GTDHQKGEYPFTIVPR	ref|NC_010546.1|:4878729-4880243_circadian_clock_protein_KaiC_[Cyanothece_sp._ATCC_51142	si_0155x0.5xCell_Division_and_Cell_CyclexUnclassified_cell_division_and_cell_cyclexCyanobacterial_Circadian_Clock
172039629	ITSGSHELDR	ref|NC_010546.1|:4878729-4880243_circadian_clock_protein_KaiC_[Cyanothece_sp._ATCC_51142	si_0155x0.5xCell_Division_and_Cell_CyclexUnclassified_cell_division_and_cell_cyclexCyanobacterial_Circadian_Clock
172039629	MTPENELDYIEKLETAIPGFDFLSEGGLPK	ref|NC_010546.1|:4878729-4880243_circadian_clock_protein_KaiC_[Cyanothece_sp._ATCC_51142	si_0155x0.5xCell_Division_and_Cell_CyclexUnclassified_cell_division_and_cell_cyclexCyanobacterial_Circadian_Clock
172039629	NVTGILSGSPMYTAQNEVERLSNLFEE	ref|NC_010546.1|:4878729-4880243_circadian_clock_protein_KaiC_[Cyanothece_sp._ATCC_51142	si_0155x0.5xCell_Division_and_Cell_CyclexUnclassified_cell_division_and_cell_cyclexCyanobacterial_Circadian_Clock
172039629	RGVVIIPLSAIELEQK	ref|NC_010546.1|:4878729-4880243_circadian_clock_protein_KaiC_[Cyanothece_sp._ATCC_51142	si_0155x0.5xCell_Division_and_Cell_CyclexUnclassified_cell_division_and_cell_cyclexCyanobacterial_Circadian_Clock
172039629	RGVVIIPLSAIELEQKSSNIR	ref|NC_010546.1|:4878729-4880243_circadian_clock_protein_KaiC_[Cyanothece_sp._ATCC_51142	si_0155x0.5xCell_Division_and_Cell_CyclexUnclassified_cell_division_and_cell_cyclexCyanobacterial_Circadian_Clock
172039629	VAVDSLSALER	ref|NC_010546.1|:4878729-4880243_circadian_clock_protein_KaiC_[Cyanothece_sp._ATCC_51142	si_0155x0.5xCell_Division_and_Cell_CyclexUnclassified_cell_division_and_cell_cyclexCyanobacterial_Circadian_Clock
172039629	VSMDSLGAIFSHLSDSAQVR	ref|NC_010546.1|:4878729-4880243_circadian_clock_protein_KaiC_[Cyanothece_sp._ATCC_51142	si_0155x0.5xCell_Division_and_Cell_CyclexUnclassified_cell_division_and_cell_cyclexCyanobacterial_Circadian_Clock
172039618	DRLGNIEQIRDLLFGNTIR	ref|NC_010546.1|:4869767-4870417_hypothetical_protein_cce_4705_[Cyanothece_sp._ATCC_51142
172039618	EFSLFETETR	ref|NC_010546.1|:4869767-4870417_hypothetical_protein_cce_4705_[Cyanothece_sp._ATCC_51142
172039618	EFSLFETETRDRLDQLQDSLTTEIR	ref|NC_010546.1|:4869767-4870417_hypothetical_protein_cce_4705_[Cyanothece_sp._ATCC_51142
172039618	ELDSTAKNNSR	ref|NC_010546.1|:4869767-4870417_hypothetical_protein_cce_4705_[Cyanothece_sp._ATCC_51142
172039618	EQVFEAIQNELVDLQDK	ref|NC_010546.1|:4869767-4870417_hypothetical_protein_cce_4705_[Cyanothece_sp._ATCC_51142
172039618	EQVFEAIQNELVDLQDKK	ref|NC_010546.1|:4869767-4870417_hypothetical_protein_cce_4705_[Cyanothece_sp._ATCC_51142
172039618	IKGDELVTDFPENTEQHSHTELFLPEQQASLESEHNDE	ref|NC_010546.1|:4869767-4870417_hypothetical_protein_cce_4705_[Cyanothece_sp._ATCC_51142
172039618	LGNIEQIRDLLFGNTIR	ref|NC_010546.1|:4869767-4870417_hypothetical_protein_cce_4705_[Cyanothece_sp._ATCC_51142
172039618	LGNIEQIRDLLFGNTIREYDKR	ref|NC_010546.1|:4869767-4870417_hypothetical_protein_cce_4705_[Cyanothece_sp._ATCC_51142
172039618	SIESLNQTITGQTNFLR	ref|NC_010546.1|:4869767-4870417_hypothetical_protein_cce_4705_[Cyanothece_sp._ATCC_51142
172039618	SIESLNQTITGQTNFLRNDLVQTR	ref|NC_010546.1|:4869767-4870417_hypothetical_protein_cce_4705_[Cyanothece_sp._ATCC_51142
172039618	SMQSLREQVFEAIQNELVDLQDKK	ref|NC_010546.1|:4869767-4870417_hypothetical_protein_cce_4705_[Cyanothece_sp._ATCC_51142
172039618	YLSMTTHEQINQLEKELDSTAK	ref|NC_010546.1|:4869767-4870417_hypothetical_protein_cce_4705_[Cyanothece_sp._ATCC_51142
172039617	DLIEMGALLAK	ref|NC_010546.1|:4867582-4869681_Na+/H+_antiporter_[Cyanothece_sp._ATCC_51142	si_0578x0.5xMiscellaneousxUnclassified_miscellaneousxZZ_gjo_need_homes
172039617	ESGIIVPVSIATAGVHMDDPQLDGNLKR	ref|NC_010546.1|:4867582-4869681_Na+/H+_antiporter_[Cyanothece_sp._ATCC_51142	si_0578x0.5xMiscellaneousxUnclassified_miscellaneousxZZ_gjo_need_homes
172039617	IDDDIAYGISR	ref|NC_010546.1|:4867582-4869681_Na+/H+_antiporter_[Cyanothece_sp._ATCC_51142	si_0578x0.5xMiscellaneousxUnclassified_miscellaneousxZZ_gjo_need_homes
172039617	LFADANQGSITLLHISDR	ref|NC_010546.1|:4867582-4869681_Na+/H+_antiporter_[Cyanothece_sp._ATCC_51142	si_0578x0.5xMiscellaneousxUnclassified_miscellaneousxZZ_gjo_need_homes
172039617	NDSFNIVIPIYNPHTQR	ref|NC_010546.1|:4867582-4869681_Na+/H+_antiporter_[Cyanothece_sp._ATCC_51142	si_0578x0.5xMiscellaneousxUnclassified_miscellaneousxZZ_gjo_need_homes
172039617	QTPSQQVTEFK	ref|NC_010546.1|:4867582-4869681_Na+/H+_antiporter_[Cyanothece_sp._ATCC_51142	si_0578x0.5xMiscellaneousxUnclassified_miscellaneousxZZ_gjo_need_homes
172039617	TIENEAPGTIR	ref|NC_010546.1|:4867582-4869681_Na+/H+_antiporter_[Cyanothece_sp._ATCC_51142	si_0578x0.5xMiscellaneousxUnclassified_miscellaneousxZZ_gjo_need_homes
172039614	NLKTEATITEASKK	ref|NC_010546.1|:c4865999-4865313_glutathione_S-transferase_[Cyanothece_sp._ATCC_51142	si_0860x1xStress_ResponsexOxidative_stressxGlutathione:_Non-redox_reactions
172039609	VPNTSDISQALEK	ref|NC_010546.1|:c4862708-4861146_hypothetical_protein_cce_4696_[Cyanothece_sp._ATCC_51142	si_0490x1xMembrane_TransportxABC_transportersxABC_transporter_dipeptide_(TC_3.A.1.5.2)
172039609	YESLGDYR	ref|NC_010546.1|:c4862708-4861146_hypothetical_protein_cce_4696_[Cyanothece_sp._ATCC_51142	si_0490x1xMembrane_TransportxABC_transportersxABC_transporter_dipeptide_(TC_3.A.1.5.2)
172039608	ATLASTDAEVQR	ref|NC_010546.1|:4859596-4860957_hypothetical_protein_cce_4695_[Cyanothece_sp._ATCC_51142	si_0962x1xNo_Function_MatchxNo_Function_MatchxNone
172039607	LNYTALTQR	ref|NC_010546.1|:4858855-4859484_hypothetical_protein_cce_4694_[Cyanothece_sp._ATCC_51142	si_0962x1xNo_Function_MatchxNo_Function_MatchxNone
172039607	LVDTEAYDNFGTR	ref|NC_010546.1|:4858855-4859484_hypothetical_protein_cce_4694_[Cyanothece_sp._ATCC_51142	si_0962x1xNo_Function_MatchxNo_Function_MatchxNone
172039607	YSLDYSLDAPVGHLPNPRPEYQITGGR	ref|NC_010546.1|:4858855-4859484_hypothetical_protein_cce_4694_[Cyanothece_sp._ATCC_51142	si_0962x1xNo_Function_MatchxNo_Function_MatchxNone
172039606	IAIVGDILHSR	ref|NC_010546.1|:c4858658-4857669_aspartate_carbamoyltransferase_catalytic_subunit_[Cyanothece_sp._ATCC_51142	si_0315x0.3xClustering-based_subsystemsxUnclassified_clustering-based_subsystemsxCBSS-320372.3.peg.6046
172039606	SSFELAAKR	ref|NC_010546.1|:c4858658-4857669_aspartate_carbamoyltransferase_catalytic_subunit_[Cyanothece_sp._ATCC_51142	si_0315x0.3xClustering-based_subsystemsxUnclassified_clustering-based_subsystemsxCBSS-320372.3.peg.6046
172039605	AFSLASIPAQGVGLAR	ref|NC_010546.1|:4854944-4857430_phosphoenolpyruvate_synthase_[Cyanothece_sp._ATCC_51142	si_0064x0.1xCarbohydratesxCentral_carbohydrate_metabolismxDihydroxyacetone_kinases
172039605	AHPLALMKFDELEDEGVKEQITELTK	ref|NC_010546.1|:4854944-4857430_phosphoenolpyruvate_synthase_[Cyanothece_sp._ATCC_51142	si_0064x0.1xCarbohydratesxCentral_carbohydrate_metabolismxDihydroxyacetone_kinases
172039605	ASAIVTNQGGR	ref|NC_010546.1|:4854944-4857430_phosphoenolpyruvate_synthase_[Cyanothece_sp._ATCC_51142	si_0064x0.1xCarbohydratesxCentral_carbohydrate_metabolismxDihydroxyacetone_kinases
172039605	FLVELGIDSMSLNPDSVLK	ref|NC_010546.1|:4854944-4857430_phosphoenolpyruvate_synthase_[Cyanothece_sp._ATCC_51142	si_0064x0.1xCarbohydratesxCentral_carbohydrate_metabolismxDihydroxyacetone_kinases
172039605	GVATIAASFYPKPVIVR	ref|NC_010546.1|:4854944-4857430_phosphoenolpyruvate_synthase_[Cyanothece_sp._ATCC_51142	si_0064x0.1xCarbohydratesxCentral_carbohydrate_metabolismxDihydroxyacetone_kinases
172039605	HFIESAGLESR	ref|NC_010546.1|:4854944-4857430_phosphoenolpyruvate_synthase_[Cyanothece_sp._ATCC_51142	si_0064x0.1xCarbohydratesxCentral_carbohydrate_metabolismxDihydroxyacetone_kinases
172039605	KASAIVTNQGGR	ref|NC_010546.1|:4854944-4857430_phosphoenolpyruvate_synthase_[Cyanothece_sp._ATCC_51142	si_0064x0.1xCarbohydratesxCentral_carbohydrate_metabolismxDihydroxyacetone_kinases
172039605	LEFIIANHIK	ref|NC_010546.1|:4854944-4857430_phosphoenolpyruvate_synthase_[Cyanothece_sp._ATCC_51142	si_0064x0.1xCarbohydratesxCentral_carbohydrate_metabolismxDihydroxyacetone_kinases
172039605	LRDLFDDLDVNDVANLQER	ref|NC_010546.1|:4854944-4857430_phosphoenolpyruvate_synthase_[Cyanothece_sp._ATCC_51142	si_0064x0.1xCarbohydratesxCentral_carbohydrate_metabolismxDihydroxyacetone_kinases
172039605	MIYDTGGSKLTK	ref|NC_010546.1|:4854944-4857430_phosphoenolpyruvate_synthase_[Cyanothece_sp._ATCC_51142	si_0064x0.1xCarbohydratesxCentral_carbohydrate_metabolismxDihydroxyacetone_kinases
172039605	NAALITAAYGLGENVVQGSVNPDEYYVFKPTLK	ref|NC_010546.1|:4854944-4857430_phosphoenolpyruvate_synthase_[Cyanothece_sp._ATCC_51142	si_0064x0.1xCarbohydratesxCentral_carbohydrate_metabolismxDihydroxyacetone_kinases
172039605	NSSLGEMIQQLNPK	ref|NC_010546.1|:4854944-4857430_phosphoenolpyruvate_synthase_[Cyanothece_sp._ATCC_51142	si_0064x0.1xCarbohydratesxCentral_carbohydrate_metabolismxDihydroxyacetone_kinases
172039605	SLILNTPFPEELQEAIKK	ref|NC_010546.1|:4854944-4857430_phosphoenolpyruvate_synthase_[Cyanothece_sp._ATCC_51142	si_0064x0.1xCarbohydratesxCentral_carbohydrate_metabolismxDihydroxyacetone_kinases
172039605	SVGAAIGQGK	ref|NC_010546.1|:4854944-4857430_phosphoenolpyruvate_synthase_[Cyanothece_sp._ATCC_51142	si_0064x0.1xCarbohydratesxCentral_carbohydrate_metabolismxDihydroxyacetone_kinases
172039605	TLLMVAEVEKG	ref|NC_010546.1|:4854944-4857430_phosphoenolpyruvate_synthase_[Cyanothece_sp._ATCC_51142	si_0064x0.1xCarbohydratesxCentral_carbohydrate_metabolismxDihydroxyacetone_kinases
172039605	TQILMNVGNPEK	ref|NC_010546.1|:4854944-4857430_phosphoenolpyruvate_synthase_[Cyanothece_sp._ATCC_51142	si_0064x0.1xCarbohydratesxCentral_carbohydrate_metabolismxDihydroxyacetone_kinases
172039605	VILEASKIDQFKPGEVLITNR	ref|NC_010546.1|:4854944-4857430_phosphoenolpyruvate_synthase_[Cyanothece_sp._ATCC_51142	si_0064x0.1xCarbohydratesxCentral_carbohydrate_metabolismxDihydroxyacetone_kinases
172039605	YDDKPQFFVDKLAR	ref|NC_010546.1|:4854944-4857430_phosphoenolpyruvate_synthase_[Cyanothece_sp._ATCC_51142	si_0064x0.1xCarbohydratesxCentral_carbohydrate_metabolismxDihydroxyacetone_kinases
172039601	DITNNNTINSENLQVEQTEAK	ref|NC_010546.1|:c4853105-4852824_hypothetical_protein_cce_4688_[Cyanothece_sp._ATCC_51142	si_0962x1xNo_Function_MatchxNo_Function_MatchxNone
172039601	MNNNTETPQAVIDAVFKDITNNNTINSENLQVEQTEAK	ref|NC_010546.1|:c4853105-4852824_hypothetical_protein_cce_4688_[Cyanothece_sp._ATCC_51142	si_0962x1xNo_Function_MatchxNo_Function_MatchxNone
172039601	TDQTGQNLR	ref|NC_010546.1|:c4853105-4852824_hypothetical_protein_cce_4688_[Cyanothece_sp._ATCC_51142	si_0962x1xNo_Function_MatchxNo_Function_MatchxNone
172039601	TDQTGQNLRK	ref|NC_010546.1|:c4853105-4852824_hypothetical_protein_cce_4688_[Cyanothece_sp._ATCC_51142	si_0962x1xNo_Function_MatchxNo_Function_MatchxNone
172039601	TDQTGQNLRKES	ref|NC_010546.1|:c4853105-4852824_hypothetical_protein_cce_4688_[Cyanothece_sp._ATCC_51142	si_0962x1xNo_Function_MatchxNo_Function_MatchxNone
172039601	TWSDGCLGLAQPDEFCTQALVEGWR	ref|NC_010546.1|:c4853105-4852824_hypothetical_protein_cce_4688_[Cyanothece_sp._ATCC_51142	si_0962x1xNo_Function_MatchxNo_Function_MatchxNone
172039601	VTVTAGETTWVYR	ref|NC_010546.1|:c4853105-4852824_hypothetical_protein_cce_4688_[Cyanothece_sp._ATCC_51142	si_0962x1xNo_Function_MatchxNo_Function_MatchxNone
172039600	ALETLEEMLKDR	ref|NC_010546.1|:c4852448-4851276_transaldolase_AB_family_[Cyanothece_sp._ATCC_51142	si_0073x0.3xCarbohydratesxCentral_carbohydrate_metabolismxPentose_phosphate_pathway
172039600	ALETLEEMLKDRLTR	ref|NC_010546.1|:c4852448-4851276_transaldolase_AB_family_[Cyanothece_sp._ATCC_51142	si_0073x0.3xCarbohydratesxCentral_carbohydrate_metabolismxPentose_phosphate_pathway
172039600	ATFDKMHQEDKMAYEKLDEGITGFTK	ref|NC_010546.1|:c4852448-4851276_transaldolase_AB_family_[Cyanothece_sp._ATCC_51142	si_0073x0.3xCarbohydratesxCentral_carbohydrate_metabolismxPentose_phosphate_pathway
172039600	DATTNPSLITAAAQMPQYQSIVDDTLKIAR	ref|NC_010546.1|:c4852448-4851276_transaldolase_AB_family_[Cyanothece_sp._ATCC_51142	si_0073x0.3xCarbohydratesxCentral_carbohydrate_metabolismxPentose_phosphate_pathway
172039600	ELGKDADESDVVTLAFDR	ref|NC_010546.1|:c4852448-4851276_transaldolase_AB_family_[Cyanothece_sp._ATCC_51142	si_0073x0.3xCarbohydratesxCentral_carbohydrate_metabolismxPentose_phosphate_pathway
172039600	ETGKEYAPTEDPGVISVTSIYNYYKK	ref|NC_010546.1|:c4852448-4851276_transaldolase_AB_family_[Cyanothece_sp._ATCC_51142	si_0073x0.3xCarbohydratesxCentral_carbohydrate_metabolismxPentose_phosphate_pathway
172039600	IARKELGKDADESDVVTLAFDR	ref|NC_010546.1|:c4852448-4851276_transaldolase_AB_family_[Cyanothece_sp._ATCC_51142	si_0073x0.3xCarbohydratesxCentral_carbohydrate_metabolismxPentose_phosphate_pathway
172039600	IASTWEGIK	ref|NC_010546.1|:c4852448-4851276_transaldolase_AB_family_[Cyanothece_sp._ATCC_51142	si_0073x0.3xCarbohydratesxCentral_carbohydrate_metabolismxPentose_phosphate_pathway
172039600	KELGKDADESDVVTLAFDR	ref|NC_010546.1|:c4852448-4851276_transaldolase_AB_family_[Cyanothece_sp._ATCC_51142	si_0073x0.3xCarbohydratesxCentral_carbohydrate_metabolismxPentose_phosphate_pathway
172039600	KELGKDADESDVVTLAFDRLAVAFGLK	ref|NC_010546.1|:c4852448-4851276_transaldolase_AB_family_[Cyanothece_sp._ATCC_51142	si_0073x0.3xCarbohydratesxCentral_carbohydrate_metabolismxPentose_phosphate_pathway
172039600	KLDPEAAAK	ref|NC_010546.1|:c4852448-4851276_transaldolase_AB_family_[Cyanothece_sp._ATCC_51142	si_0073x0.3xCarbohydratesxCentral_carbohydrate_metabolismxPentose_phosphate_pathway
172039600	KLDPEAAAKMDIEKIPMDK	ref|NC_010546.1|:c4852448-4851276_transaldolase_AB_family_[Cyanothece_sp._ATCC_51142	si_0073x0.3xCarbohydratesxCentral_carbohydrate_metabolismxPentose_phosphate_pathway
172039600	LLEQLNSTEEALPR	ref|NC_010546.1|:c4852448-4851276_transaldolase_AB_family_[Cyanothece_sp._ATCC_51142	si_0073x0.3xCarbohydratesxCentral_carbohydrate_metabolismxPentose_phosphate_pathway
172039600	LSYDTEGTLEK	ref|NC_010546.1|:c4852448-4851276_transaldolase_AB_family_[Cyanothece_sp._ATCC_51142	si_0073x0.3xCarbohydratesxCentral_carbohydrate_metabolismxPentose_phosphate_pathway
172039600	LSYDTEGTLEKAR	ref|NC_010546.1|:c4852448-4851276_transaldolase_AB_family_[Cyanothece_sp._ATCC_51142	si_0073x0.3xCarbohydratesxCentral_carbohydrate_metabolismxPentose_phosphate_pathway
172039600	MDIEKIPMDKATFDKMHQEDKMAYEKLDEGITGFTK	ref|NC_010546.1|:c4852448-4851276_transaldolase_AB_family_[Cyanothece_sp._ATCC_51142	si_0073x0.3xCarbohydratesxCentral_carbohydrate_metabolismxPentose_phosphate_pathway
172039600	MHQEDKMAYEKLDEGITGFTK	ref|NC_010546.1|:c4852448-4851276_transaldolase_AB_family_[Cyanothece_sp._ATCC_51142	si_0073x0.3xCarbohydratesxCentral_carbohydrate_metabolismxPentose_phosphate_pathway
172039600	TEVMGASFR	ref|NC_010546.1|:c4852448-4851276_transaldolase_AB_family_[Cyanothece_sp._ATCC_51142	si_0073x0.3xCarbohydratesxCentral_carbohydrate_metabolismxPentose_phosphate_pathway
172039600	VSTEVDAR	ref|NC_010546.1|:c4852448-4851276_transaldolase_AB_family_[Cyanothece_sp._ATCC_51142	si_0073x0.3xCarbohydratesxCentral_carbohydrate_metabolismxPentose_phosphate_pathway
172039599	AAGLDYVK	ref|NC_010546.1|:c4851245-4850163_thiamine-phosphate_pyrophosphorylase_[Cyanothece_sp._ATCC_51142	si_0362x0.3xCofactors,_Vitamins,_Prosthetic_Groups,_PigmentsxFolate_and_pterinesx5-FCL-like_protein
172039599	AIAEKADYIGVGPVYATPTKPDKK	ref|NC_010546.1|:c4851245-4850163_thiamine-phosphate_pyrophosphorylase_[Cyanothece_sp._ATCC_51142	si_0362x0.3xCofactors,_Vitamins,_Prosthetic_Groups,_PigmentsxFolate_and_pterinesx5-FCL-like_protein
172039599	AIMEADDPQKTTQK	ref|NC_010546.1|:c4851245-4850163_thiamine-phosphate_pyrophosphorylase_[Cyanothece_sp._ATCC_51142	si_0362x0.3xCofactors,_Vitamins,_Prosthetic_Groups,_PigmentsxFolate_and_pterinesx5-FCL-like_protein
172039599	EKKIDDIVR	ref|NC_010546.1|:c4851245-4850163_thiamine-phosphate_pyrophosphorylase_[Cyanothece_sp._ATCC_51142	si_0362x0.3xCofactors,_Vitamins,_Prosthetic_Groups,_PigmentsxFolate_and_pterinesx5-FCL-like_protein
172039599	ILDANLDRAR	ref|NC_010546.1|:c4851245-4850163_thiamine-phosphate_pyrophosphorylase_[Cyanothece_sp._ATCC_51142	si_0362x0.3xCofactors,_Vitamins,_Prosthetic_Groups,_PigmentsxFolate_and_pterinesx5-FCL-like_protein
172039599	ILGPNKIIGR	ref|NC_010546.1|:c4851245-4850163_thiamine-phosphate_pyrophosphorylase_[Cyanothece_sp._ATCC_51142	si_0362x0.3xCofactors,_Vitamins,_Prosthetic_Groups,_PigmentsxFolate_and_pterinesx5-FCL-like_protein
172039599	IVESALQGGLTLLQYR	ref|NC_010546.1|:c4851245-4850163_thiamine-phosphate_pyrophosphorylase_[Cyanothece_sp._ATCC_51142	si_0362x0.3xCofactors,_Vitamins,_Prosthetic_Groups,_PigmentsxFolate_and_pterinesx5-FCL-like_protein
172039599	YQVYTLESELLQNYR	ref|NC_010546.1|:c4851245-4850163_thiamine-phosphate_pyrophosphorylase_[Cyanothece_sp._ATCC_51142	si_0362x0.3xCofactors,_Vitamins,_Prosthetic_Groups,_PigmentsxFolate_and_pterinesx5-FCL-like_protein
172039597	ANQTLGLDSNLYQYFQQVSIR	ref|NC_010546.1|:c4849913-4849251_O-methyltransferase_family_protein_[Cyanothece_sp._ATCC_51142	si_0962x1xNo_Function_MatchxNo_Function_MatchxNone
172039597	VANSDIQDNR	ref|NC_010546.1|:c4849913-4849251_O-methyltransferase_family_protein_[Cyanothece_sp._ATCC_51142	si_0962x1xNo_Function_MatchxNo_Function_MatchxNone
172039597	VANSDIQDNRTK	ref|NC_010546.1|:c4849913-4849251_O-methyltransferase_family_protein_[Cyanothece_sp._ATCC_51142	si_0962x1xNo_Function_MatchxNo_Function_MatchxNone
172039596	AKQLLTDILTEDSR	ref|NC_010546.1|:4848285-4849160_putative_MscS_mechanosensitive_ion_channel_[Cyanothece_sp._ATCC_51142	si_0314x0.5xClustering-based_subsystemsxUnclassified_clustering-based_subsystemsxCBSS-316407.3.peg.2816
172039596	EIQIFNTILTSPDNR	ref|NC_010546.1|:4848285-4849160_putative_MscS_mechanosensitive_ion_channel_[Cyanothece_sp._ATCC_51142	si_0314x0.5xClustering-based_subsystemsxUnclassified_clustering-based_subsystemsxCBSS-316407.3.peg.2816
172039596	EIQIFNTILTSPDNRR	ref|NC_010546.1|:4848285-4849160_putative_MscS_mechanosensitive_ion_channel_[Cyanothece_sp._ATCC_51142	si_0314x0.5xClustering-based_subsystemsxUnclassified_clustering-based_subsystemsxCBSS-316407.3.peg.2816
172039596	FDEAGINIPFPQTDVHIHQS	ref|NC_010546.1|:4848285-4849160_putative_MscS_mechanosensitive_ion_channel_[Cyanothece_sp._ATCC_51142	si_0314x0.5xClustering-based_subsystemsxUnclassified_clustering-based_subsystemsxCBSS-316407.3.peg.2816
172039596	FFESSITNYSAEATR	ref|NC_010546.1|:4848285-4849160_putative_MscS_mechanosensitive_ion_channel_[Cyanothece_sp._ATCC_51142	si_0314x0.5xClustering-based_subsystemsxUnclassified_clustering-based_subsystemsxCBSS-316407.3.peg.2816
172039596	ILTDPSPTVGLLELGDSSVNFAVRPWVK	ref|NC_010546.1|:4848285-4849160_putative_MscS_mechanosensitive_ion_channel_[Cyanothece_sp._ATCC_51142	si_0314x0.5xClustering-based_subsystemsxUnclassified_clustering-based_subsystemsxCBSS-316407.3.peg.2816
172039596	QADYWDVYFSLQETVK	ref|NC_010546.1|:4848285-4849160_putative_MscS_mechanosensitive_ion_channel_[Cyanothece_sp._ATCC_51142	si_0314x0.5xClustering-based_subsystemsxUnclassified_clustering-based_subsystemsxCBSS-316407.3.peg.2816
172039596	QLLTDILTEDSR	ref|NC_010546.1|:4848285-4849160_putative_MscS_mechanosensitive_ion_channel_[Cyanothece_sp._ATCC_51142	si_0314x0.5xClustering-based_subsystemsxUnclassified_clustering-based_subsystemsxCBSS-316407.3.peg.2816
172039596	QRFDEAGINIPFPQTDVHIHQS	ref|NC_010546.1|:4848285-4849160_putative_MscS_mechanosensitive_ion_channel_[Cyanothece_sp._ATCC_51142	si_0314x0.5xClustering-based_subsystemsxUnclassified_clustering-based_subsystemsxCBSS-316407.3.peg.2816
172039596	VGDYIEGGGTAGIVK	ref|NC_010546.1|:4848285-4849160_putative_MscS_mechanosensitive_ion_channel_[Cyanothece_sp._ATCC_51142	si_0314x0.5xClustering-based_subsystemsxUnclassified_clustering-based_subsystemsxCBSS-316407.3.peg.2816
172039595	ADFGIIFDTDVDR	ref|NC_010546.1|:4846686-4848215_putative_phosphoglucomutases_[Cyanothece_sp._ATCC_51142	si_0178x0.5xCell_Wall_and_CapsulexCapsular_and_extracellular_polysacchridesxSialic_Acid_Metabolism
172039595	DGGLNKGDIADILNLAEENEFQIAQQK	ref|NC_010546.1|:4846686-4848215_putative_phosphoglucomutases_[Cyanothece_sp._ATCC_51142	si_0178x0.5xCell_Wall_and_CapsulexCapsular_and_extracellular_polysacchridesxSialic_Acid_Metabolism
172039595	EGVNHLDNFDQPLKGLK	ref|NC_010546.1|:4846686-4848215_putative_phosphoglucomutases_[Cyanothece_sp._ATCC_51142	si_0178x0.5xCell_Wall_and_CapsulexCapsular_and_extracellular_polysacchridesxSialic_Acid_Metabolism
172039595	GIIQNYDFISVYAQGLVK	ref|NC_010546.1|:4846686-4848215_putative_phosphoglucomutases_[Cyanothece_sp._ATCC_51142	si_0178x0.5xCell_Wall_and_CapsulexCapsular_and_extracellular_polysacchridesxSialic_Acid_Metabolism
172039595	GVALEGIPDEKVNLTPEVAK	ref|NC_010546.1|:4846686-4848215_putative_phosphoglucomutases_[Cyanothece_sp._ATCC_51142	si_0178x0.5xCell_Wall_and_CapsulexCapsular_and_extracellular_polysacchridesxSialic_Acid_Metabolism
172039595	GYKNVINESIR	ref|NC_010546.1|:4846686-4848215_putative_phosphoglucomutases_[Cyanothece_sp._ATCC_51142	si_0178x0.5xCell_Wall_and_CapsulexCapsular_and_extracellular_polysacchridesxSialic_Acid_Metabolism
172039595	IIVDAGNGAGGFYAEK	ref|NC_010546.1|:4846686-4848215_putative_phosphoglucomutases_[Cyanothece_sp._ATCC_51142	si_0178x0.5xCell_Wall_and_CapsulexCapsular_and_extracellular_polysacchridesxSialic_Acid_Metabolism
172039595	IKTENFKDYGNDIIR	ref|NC_010546.1|:4846686-4848215_putative_phosphoglucomutases_[Cyanothece_sp._ATCC_51142	si_0178x0.5xCell_Wall_and_CapsulexCapsular_and_extracellular_polysacchridesxSialic_Acid_Metabolism
172039595	ILGQAFVSWLGKK	ref|NC_010546.1|:4846686-4848215_putative_phosphoglucomutases_[Cyanothece_sp._ATCC_51142	si_0178x0.5xCell_Wall_and_CapsulexCapsular_and_extracellular_polysacchridesxSialic_Acid_Metabolism
172039595	LLDFLKGFDALDLTAFNV	ref|NC_010546.1|:4846686-4848215_putative_phosphoglucomutases_[Cyanothece_sp._ATCC_51142	si_0178x0.5xCell_Wall_and_CapsulexCapsular_and_extracellular_polysacchridesxSialic_Acid_Metabolism
172039595	LSGPNLLAAVTEGISLLGSK	ref|NC_010546.1|:4846686-4848215_putative_phosphoglucomutases_[Cyanothece_sp._ATCC_51142	si_0178x0.5xCell_Wall_and_CapsulexCapsular_and_extracellular_polysacchridesxSialic_Acid_Metabolism
172039595	LSLHDPVIPINIESNISGGVQNIATK	ref|NC_010546.1|:4846686-4848215_putative_phosphoglucomutases_[Cyanothece_sp._ATCC_51142	si_0178x0.5xCell_Wall_and_CapsulexCapsular_and_extracellular_polysacchridesxSialic_Acid_Metabolism
172039595	SAAVDSFGKELNR	ref|NC_010546.1|:4846686-4848215_putative_phosphoglucomutases_[Cyanothece_sp._ATCC_51142	si_0178x0.5xCell_Wall_and_CapsulexCapsular_and_extracellular_polysacchridesxSialic_Acid_Metabolism
172039595	VLTDLIANLKEPEESQEFR	ref|NC_010546.1|:4846686-4848215_putative_phosphoglucomutases_[Cyanothece_sp._ATCC_51142	si_0178x0.5xCell_Wall_and_CapsulexCapsular_and_extracellular_polysacchridesxSialic_Acid_Metabolism
172039595	VLTDLIANLKEPEESQEFRLK	ref|NC_010546.1|:4846686-4848215_putative_phosphoglucomutases_[Cyanothece_sp._ATCC_51142	si_0178x0.5xCell_Wall_and_CapsulexCapsular_and_extracellular_polysacchridesxSialic_Acid_Metabolism
172039592	FNDLVTDK	ref|NC_010546.1|:c4845654-4845103_6,7-dimethyl-8-ribityllumazine_synthase_[Cyanothece_sp._ATCC_51142	si_0386x1xCofactors,_Vitamins,_Prosthetic_Groups,_PigmentsxRiboflavin,_FMN,_FADxRiboflavin,_FMN_and_FAD_metabolism
172039592	GIAAVGFQTGTPVVFGILTTDTMQQALER	ref|NC_010546.1|:c4845654-4845103_6,7-dimethyl-8-ribityllumazine_synthase_[Cyanothece_sp._ATCC_51142	si_0386x1xCofactors,_Vitamins,_Prosthetic_Groups,_PigmentsxRiboflavin,_FMN,_FADxRiboflavin,_FMN_and_FAD_metabolism
172039592	GQVTPNNSQASLPVSQMK	ref|NC_010546.1|:c4845654-4845103_6,7-dimethyl-8-ribityllumazine_synthase_[Cyanothece_sp._ATCC_51142	si_0386x1xCofactors,_Vitamins,_Prosthetic_Groups,_PigmentsxRiboflavin,_FMN,_FADxRiboflavin,_FMN_and_FAD_metabolism
172039592	GQVTPNNSQASLPVSQMKNPMISE	ref|NC_010546.1|:c4845654-4845103_6,7-dimethyl-8-ribityllumazine_synthase_[Cyanothece_sp._ATCC_51142	si_0386x1xCofactors,_Vitamins,_Prosthetic_Groups,_PigmentsxRiboflavin,_FMN,_FADxRiboflavin,_FMN_and_FAD_metabolism
172039592	HGIDVNPHGTQVDYVWVPGSFEVPLVAR	ref|NC_010546.1|:c4845654-4845103_6,7-dimethyl-8-ribityllumazine_synthase_[Cyanothece_sp._ATCC_51142	si_0386x1xCofactors,_Vitamins,_Prosthetic_Groups,_PigmentsxRiboflavin,_FMN,_FADxRiboflavin,_FMN_and_FAD_metabolism
172039592	SNLGWNYALNALEMASLMGQLR	ref|NC_010546.1|:c4845654-4845103_6,7-dimethyl-8-ribityllumazine_synthase_[Cyanothece_sp._ATCC_51142	si_0386x1xCofactors,_Vitamins,_Prosthetic_Groups,_PigmentsxRiboflavin,_FMN,_FADxRiboflavin,_FMN_and_FAD_metabolism
172039592	TIFEGTFTQDPSTLR	ref|NC_010546.1|:c4845654-4845103_6,7-dimethyl-8-ribityllumazine_synthase_[Cyanothece_sp._ATCC_51142	si_0386x1xCofactors,_Vitamins,_Prosthetic_Groups,_PigmentsxRiboflavin,_FMN,_FADxRiboflavin,_FMN_and_FAD_metabolism
172039588	LGAFYNEEGIPTGIRLLIEEPTMTLNYEAAN	ref|NC_010546.1|:4838576-4843792_hypothetical_protein_cce_4675_[Cyanothece_sp._ATCC_51142	si_0204x0.3xCell_Wall_and_CapsulexUnclassified_cell_wall_and_capsulexMurein_Hydrolases
172039586	AFIEGAKNHPALTTAK	ref|NC_010546.1|:c4837392-4835773_beta-glucosidase_[Cyanothece_sp._ATCC_51142	si_0044x0.2xAmino_Acids_and_DerivativesxLysine,_threonine,_methionine,_and_cysteinexMethionine_Salvage
172039586	FADSEEIAIK	ref|NC_010546.1|:c4837392-4835773_beta-glucosidase_[Cyanothece_sp._ATCC_51142	si_0044x0.2xAmino_Acids_and_DerivativesxLysine,_threonine,_methionine,_and_cysteinexMethionine_Salvage
172039586	NHPALTTAK	ref|NC_010546.1|:c4837392-4835773_beta-glucosidase_[Cyanothece_sp._ATCC_51142	si_0044x0.2xAmino_Acids_and_DerivativesxLysine,_threonine,_methionine,_and_cysteinexMethionine_Salvage
172039586	NLIVVDDILNADFLER	ref|NC_010546.1|:c4837392-4835773_beta-glucosidase_[Cyanothece_sp._ATCC_51142	si_0044x0.2xAmino_Acids_and_DerivativesxLysine,_threonine,_methionine,_and_cysteinexMethionine_Salvage
172039586	TPLFIAADIEEGVGQR	ref|NC_010546.1|:c4837392-4835773_beta-glucosidase_[Cyanothece_sp._ATCC_51142	si_0044x0.2xAmino_Acids_and_DerivativesxLysine,_threonine,_methionine,_and_cysteinexMethionine_Salvage
172039584	TGPGTNYR	ref|NC_010546.1|:c4834628-4834284_hypothetical_protein_cce_4671_[Cyanothece_sp._ATCC_51142	si_0494x1xMembrane_TransportxABC_transportersxABC_transporter_tungstate_(TC_3.A.1.6.2)
172039579	ISLEPTAGAIAAPR	ref|NC_010546.1|:c4831577-4830711_prephenate_dehydratase_[Cyanothece_sp._ATCC_51142	si_0017x0.5xAmino_Acids_and_DerivativesxAromatic_amino_acids_and_derivativesxChorismate_Synthesis
172039579	IYGSYPVLLLQER	ref|NC_010546.1|:c4831577-4830711_prephenate_dehydratase_[Cyanothece_sp._ATCC_51142	si_0017x0.5xAmino_Acids_and_DerivativesxAromatic_amino_acids_and_derivativesxChorismate_Synthesis
172039575	FSIDSHFTR	ref|NC_010546.1|:4825163-4826359_hypothetical_protein_cce_4662_[Cyanothece_sp._ATCC_51142	si_0962x1xNo_Function_MatchxNo_Function_MatchxNone
172039575	QAVQQSIPAYDK	ref|NC_010546.1|:4825163-4826359_hypothetical_protein_cce_4662_[Cyanothece_sp._ATCC_51142	si_0962x1xNo_Function_MatchxNo_Function_MatchxNone
172039575	VNKPTLSPNLSILEQIEK	ref|NC_010546.1|:4825163-4826359_hypothetical_protein_cce_4662_[Cyanothece_sp._ATCC_51142	si_0962x1xNo_Function_MatchxNo_Function_MatchxNone
172039571	ATSDLVMIAIGGFSPLK	ref|NC_010546.1|:c4821454-4820141_sulfate_adenylyltransferase_[Cyanothece_sp._ATCC_51142	si_0037x0.5xAmino_Acids_and_DerivativesxLysine,_threonine,_methionine,_and_cysteinexCysteine_Biosynthesis
172039571	DEHPLFPK	ref|NC_010546.1|:c4821454-4820141_sulfate_adenylyltransferase_[Cyanothece_sp._ATCC_51142	si_0037x0.5xAmino_Acids_and_DerivativesxLysine,_threonine,_methionine,_and_cysteinexCysteine_Biosynthesis
172039571	DHAGVGDYYGTYDAQHIFDEFDPDALGIVPMK	ref|NC_010546.1|:c4821454-4820141_sulfate_adenylyltransferase_[Cyanothece_sp._ATCC_51142	si_0037x0.5xAmino_Acids_and_DerivativesxLysine,_threonine,_methionine,_and_cysteinexCysteine_Biosynthesis
172039571	EAIFHAIVR	ref|NC_010546.1|:c4821454-4820141_sulfate_adenylyltransferase_[Cyanothece_sp._ATCC_51142	si_0037x0.5xAmino_Acids_and_DerivativesxLysine,_threonine,_methionine,_and_cysteinexCysteine_Biosynthesis
172039571	ERGWSTVVGFQTR	ref|NC_010546.1|:c4821454-4820141_sulfate_adenylyltransferase_[Cyanothece_sp._ATCC_51142	si_0037x0.5xAmino_Acids_and_DerivativesxLysine,_threonine,_methionine,_and_cysteinexCysteine_Biosynthesis
172039571	GWSTVVGFQTR	ref|NC_010546.1|:c4821454-4820141_sulfate_adenylyltransferase_[Cyanothece_sp._ATCC_51142	si_0037x0.5xAmino_Acids_and_DerivativesxLysine,_threonine,_methionine,_and_cysteinexCysteine_Biosynthesis
172039571	IASPAEKAEFLAQADKLPK	ref|NC_010546.1|:c4821454-4820141_sulfate_adenylyltransferase_[Cyanothece_sp._ATCC_51142	si_0037x0.5xAmino_Acids_and_DerivativesxLysine,_threonine,_methionine,_and_cysteinexCysteine_Biosynthesis
172039571	LDDPNGNFIGVLELTQK	ref|NC_010546.1|:c4821454-4820141_sulfate_adenylyltransferase_[Cyanothece_sp._ATCC_51142	si_0037x0.5xAmino_Acids_and_DerivativesxLysine,_threonine,_methionine,_and_cysteinexCysteine_Biosynthesis
172039571	RGEMPPPQFSRPEVAAELIK	ref|NC_010546.1|:c4821454-4820141_sulfate_adenylyltransferase_[Cyanothece_sp._ATCC_51142	si_0037x0.5xAmino_Acids_and_DerivativesxLysine,_threonine,_methionine,_and_cysteinexCysteine_Biosynthesis
172039571	SDDIPADVR	ref|NC_010546.1|:c4821454-4820141_sulfate_adenylyltransferase_[Cyanothece_sp._ATCC_51142	si_0037x0.5xAmino_Acids_and_DerivativesxLysine,_threonine,_methionine,_and_cysteinexCysteine_Biosynthesis
172039571	TDESKHPGVK	ref|NC_010546.1|:c4821454-4820141_sulfate_adenylyltransferase_[Cyanothece_sp._ATCC_51142	si_0037x0.5xAmino_Acids_and_DerivativesxLysine,_threonine,_methionine,_and_cysteinexCysteine_Biosynthesis
172039571	THEAVNVYK	ref|NC_010546.1|:c4821454-4820141_sulfate_adenylyltransferase_[Cyanothece_sp._ATCC_51142	si_0037x0.5xAmino_Acids_and_DerivativesxLysine,_threonine,_methionine,_and_cysteinexCysteine_Biosynthesis
172039571	THTDGIAPHGGQLINR	ref|NC_010546.1|:c4821454-4820141_sulfate_adenylyltransferase_[Cyanothece_sp._ATCC_51142	si_0037x0.5xAmino_Acids_and_DerivativesxLysine,_threonine,_methionine,_and_cysteinexCysteine_Biosynthesis
172039571	VILAINPSAMR	ref|NC_010546.1|:c4821454-4820141_sulfate_adenylyltransferase_[Cyanothece_sp._ATCC_51142	si_0037x0.5xAmino_Acids_and_DerivativesxLysine,_threonine,_methionine,_and_cysteinexCysteine_Biosynthesis
172039571	VIYDQGAVNLAGPVWLLQR	ref|NC_010546.1|:c4821454-4820141_sulfate_adenylyltransferase_[Cyanothece_sp._ATCC_51142	si_0037x0.5xAmino_Acids_and_DerivativesxLysine,_threonine,_methionine,_and_cysteinexCysteine_Biosynthesis
172039571	VIYDQGAVNLAGPVWLLQRDEHPLFPK	ref|NC_010546.1|:c4821454-4820141_sulfate_adenylyltransferase_[Cyanothece_sp._ATCC_51142	si_0037x0.5xAmino_Acids_and_DerivativesxLysine,_threonine,_methionine,_and_cysteinexCysteine_Biosynthesis
172039571	YQIDPAESR	ref|NC_010546.1|:c4821454-4820141_sulfate_adenylyltransferase_[Cyanothece_sp._ATCC_51142	si_0037x0.5xAmino_Acids_and_DerivativesxLysine,_threonine,_methionine,_and_cysteinexCysteine_Biosynthesis
172039570	AIAYVPPYEEEIEASENDQR	ref|NC_010546.1|:c4819822-4817609_putative_peptidase_C14,_caspase_catalytic_[Cyanothece_sp._ATCC_51142	si_0962x1xNo_Function_MatchxNo_Function_MatchxNone
172039570	ALLQDLETASNQTNTLLDPNPDSYILDVK	ref|NC_010546.1|:c4819822-4817609_putative_peptidase_C14,_caspase_catalytic_[Cyanothece_sp._ATCC_51142	si_0962x1xNo_Function_MatchxNo_Function_MatchxNone
172039570	ATMTLTGFPANIVR	ref|NC_010546.1|:c4819822-4817609_putative_peptidase_C14,_caspase_catalytic_[Cyanothece_sp._ATCC_51142	si_0962x1xNo_Function_MatchxNo_Function_MatchxNone
172039570	FGFNPQDILTVTDKEATRQGIETAFVEHLIK	ref|NC_010546.1|:c4819822-4817609_putative_peptidase_C14,_caspase_catalytic_[Cyanothece_sp._ATCC_51142	si_0962x1xNo_Function_MatchxNo_Function_MatchxNone
172039570	GISEFKTDKDQILTLENPLEVAK	ref|NC_010546.1|:c4819822-4817609_putative_peptidase_C14,_caspase_catalytic_[Cyanothece_sp._ATCC_51142	si_0962x1xNo_Function_MatchxNo_Function_MatchxNone
172039570	GWEHIVAIAAIAPFQK	ref|NC_010546.1|:c4819822-4817609_putative_peptidase_C14,_caspase_catalytic_[Cyanothece_sp._ATCC_51142	si_0962x1xNo_Function_MatchxNo_Function_MatchxNone
172039570	IKTVQQNTDENTNETSALNVPGLPKVPR	ref|NC_010546.1|:c4819822-4817609_putative_peptidase_C14,_caspase_catalytic_[Cyanothece_sp._ATCC_51142	si_0962x1xNo_Function_MatchxNo_Function_MatchxNone
172039570	KLALLVGINDYGQGFNLK	ref|NC_010546.1|:c4819822-4817609_putative_peptidase_C14,_caspase_catalytic_[Cyanothece_sp._ATCC_51142	si_0962x1xNo_Function_MatchxNo_Function_MatchxNone
172039570	LENLGEQPLYYLVLGINSSGK	ref|NC_010546.1|:c4819822-4817609_putative_peptidase_C14,_caspase_catalytic_[Cyanothece_sp._ATCC_51142	si_0962x1xNo_Function_MatchxNo_Function_MatchxNone
172039570	LIEPGMKDFIPATSTGLTWTTSSTK	ref|NC_010546.1|:c4819822-4817609_putative_peptidase_C14,_caspase_catalytic_[Cyanothece_sp._ATCC_51142	si_0962x1xNo_Function_MatchxNo_Function_MatchxNone
172039570	LNSSSSSLPLQLR	ref|NC_010546.1|:c4819822-4817609_putative_peptidase_C14,_caspase_catalytic_[Cyanothece_sp._ATCC_51142	si_0962x1xNo_Function_MatchxNo_Function_MatchxNone
172039570	LWGLTLNEGSSQVPWR	ref|NC_010546.1|:c4819822-4817609_putative_peptidase_C14,_caspase_catalytic_[Cyanothece_sp._ATCC_51142	si_0962x1xNo_Function_MatchxNo_Function_MatchxNone
172039570	QGIETAFVEHLIK	ref|NC_010546.1|:c4819822-4817609_putative_peptidase_C14,_caspase_catalytic_[Cyanothece_sp._ATCC_51142	si_0962x1xNo_Function_MatchxNo_Function_MatchxNone
172039570	QLSSEQTPSEPLAVGQLLQESLR	ref|NC_010546.1|:c4819822-4817609_putative_peptidase_C14,_caspase_catalytic_[Cyanothece_sp._ATCC_51142	si_0962x1xNo_Function_MatchxNo_Function_MatchxNone
172039570	SGEAIKSAIER	ref|NC_010546.1|:c4819822-4817609_putative_peptidase_C14,_caspase_catalytic_[Cyanothece_sp._ATCC_51142	si_0962x1xNo_Function_MatchxNo_Function_MatchxNone
172039570	SLSTDKVTMVLDTSYHSSGHTVQGNLR	ref|NC_010546.1|:c4819822-4817609_putative_peptidase_C14,_caspase_catalytic_[Cyanothece_sp._ATCC_51142	si_0962x1xNo_Function_MatchxNo_Function_MatchxNone
172039570	SSFSSPSSQTQETGTYSLFLPGGVQLPNTLGK	ref|NC_010546.1|:c4819822-4817609_putative_peptidase_C14,_caspase_catalytic_[Cyanothece_sp._ATCC_51142	si_0962x1xNo_Function_MatchxNo_Function_MatchxNone
172039570	TDKDQILTLENPLEVAK	ref|NC_010546.1|:c4819822-4817609_putative_peptidase_C14,_caspase_catalytic_[Cyanothece_sp._ATCC_51142	si_0962x1xNo_Function_MatchxNo_Function_MatchxNone
172039570	TLETLKGISEFKTDKDQILTLENPLEVAK	ref|NC_010546.1|:c4819822-4817609_putative_peptidase_C14,_caspase_catalytic_[Cyanothece_sp._ATCC_51142	si_0962x1xNo_Function_MatchxNo_Function_MatchxNone
172039570	TTEQILPIMGGK	ref|NC_010546.1|:c4819822-4817609_putative_peptidase_C14,_caspase_catalytic_[Cyanothece_sp._ATCC_51142	si_0962x1xNo_Function_MatchxNo_Function_MatchxNone
172039570	VRQLSSEQTPSEPLAVGQLLQESLR	ref|NC_010546.1|:c4819822-4817609_putative_peptidase_C14,_caspase_catalytic_[Cyanothece_sp._ATCC_51142	si_0962x1xNo_Function_MatchxNo_Function_MatchxNone
172039570	VTLEGLDPKPYAIEQR	ref|NC_010546.1|:c4819822-4817609_putative_peptidase_C14,_caspase_catalytic_[Cyanothece_sp._ATCC_51142	si_0962x1xNo_Function_MatchxNo_Function_MatchxNone
172039570	YRLENLGEQPLYYLVLGINSSGK	ref|NC_010546.1|:c4819822-4817609_putative_peptidase_C14,_caspase_catalytic_[Cyanothece_sp._ATCC_51142	si_0962x1xNo_Function_MatchxNo_Function_MatchxNone
172039570	YYGTNSIFYPLNSSSSSLPLQLR	ref|NC_010546.1|:c4819822-4817609_putative_peptidase_C14,_caspase_catalytic_[Cyanothece_sp._ATCC_51142	si_0962x1xNo_Function_MatchxNo_Function_MatchxNone
172039569	AIETPHSPAQPARPQK	ref|NC_010546.1|:c4817428-4815806_hypothetical_protein_cce_4656_[Cyanothece_sp._ATCC_51142	si_0962x1xNo_Function_MatchxNo_Function_MatchxNone
172039569	FLDEEEAKIVYYGIQAFLR	ref|NC_010546.1|:c4817428-4815806_hypothetical_protein_cce_4656_[Cyanothece_sp._ATCC_51142	si_0962x1xNo_Function_MatchxNo_Function_MatchxNone
172039569	FTDMSEKGEPK	ref|NC_010546.1|:c4817428-4815806_hypothetical_protein_cce_4656_[Cyanothece_sp._ATCC_51142	si_0962x1xNo_Function_MatchxNo_Function_MatchxNone
172039569	GEGMPVVVVQTSRPK	ref|NC_010546.1|:c4817428-4815806_hypothetical_protein_cce_4656_[Cyanothece_sp._ATCC_51142	si_0962x1xNo_Function_MatchxNo_Function_MatchxNone
172039569	MNNLPQTTQR	ref|NC_010546.1|:c4817428-4815806_hypothetical_protein_cce_4656_[Cyanothece_sp._ATCC_51142	si_0962x1xNo_Function_MatchxNo_Function_MatchxNone
172039569	NKLSLSEEVIDKIQK	ref|NC_010546.1|:c4817428-4815806_hypothetical_protein_cce_4656_[Cyanothece_sp._ATCC_51142	si_0962x1xNo_Function_MatchxNo_Function_MatchxNone
172039569	SFEAVEDTRPPALPGYYEPLLTQAAHDVAK	ref|NC_010546.1|:c4817428-4815806_hypothetical_protein_cce_4656_[Cyanothece_sp._ATCC_51142	si_0962x1xNo_Function_MatchxNo_Function_MatchxNone
172039569	SLESLKQFR	ref|NC_010546.1|:c4817428-4815806_hypothetical_protein_cce_4656_[Cyanothece_sp._ATCC_51142	si_0962x1xNo_Function_MatchxNo_Function_MatchxNone
172039569	SRELQFFLR	ref|NC_010546.1|:c4817428-4815806_hypothetical_protein_cce_4656_[Cyanothece_sp._ATCC_51142	si_0962x1xNo_Function_MatchxNo_Function_MatchxNone
172039569	TYYPSHQATPK	ref|NC_010546.1|:c4817428-4815806_hypothetical_protein_cce_4656_[Cyanothece_sp._ATCC_51142	si_0962x1xNo_Function_MatchxNo_Function_MatchxNone
172039568	ASTLGTIENAIK	ref|NC_010546.1|:c4815790-4815185_hypothetical_protein_cce_4655_[Cyanothece_sp._ATCC_51142	si_0962x1xNo_Function_MatchxNo_Function_MatchxNone
172039568	LGAINLTLTGPAK	ref|NC_010546.1|:c4815790-4815185_hypothetical_protein_cce_4655_[Cyanothece_sp._ATCC_51142	si_0962x1xNo_Function_MatchxNo_Function_MatchxNone
172039568	QEEKPPSDQLVLALVAAEK	ref|NC_010546.1|:c4815790-4815185_hypothetical_protein_cce_4655_[Cyanothece_sp._ATCC_51142	si_0962x1xNo_Function_MatchxNo_Function_MatchxNone
172039568	WAMIELTYHPAK	ref|NC_010546.1|:c4815790-4815185_hypothetical_protein_cce_4655_[Cyanothece_sp._ATCC_51142	si_0962x1xNo_Function_MatchxNo_Function_MatchxNone
172039560	AAIRDENPVLFFEHVLLYNLK	ref|NC_010546.1|:c4805260-4804277_pyruvate_dehydrogenase_E1_component_beta_subunit_[Cyanothece_sp._ATCC_51142	si_0026x0.1xAmino_Acids_and_DerivativesxBranched-chain_amino_acidsxIsoleucine_degradation
172039560	AAIRDENPVLFFEHVLLYNLKENLPDNEYIVPLDK	ref|NC_010546.1|:c4805260-4804277_pyruvate_dehydrogenase_E1_component_beta_subunit_[Cyanothece_sp._ATCC_51142	si_0026x0.1xAmino_Acids_and_DerivativesxBranched-chain_amino_acidsxIsoleucine_degradation
172039560	AAIRDENPVLFFEHVLLYNLKENLPDNEYIVPLDKAEIVR	ref|NC_010546.1|:c4805260-4804277_pyruvate_dehydrogenase_E1_component_beta_subunit_[Cyanothece_sp._ATCC_51142	si_0026x0.1xAmino_Acids_and_DerivativesxBranched-chain_amino_acidsxIsoleucine_degradation
172039560	AETLLFNALR	ref|NC_010546.1|:c4805260-4804277_pyruvate_dehydrogenase_E1_component_beta_subunit_[Cyanothece_sp._ATCC_51142	si_0026x0.1xAmino_Acids_and_DerivativesxBranched-chain_amino_acidsxIsoleucine_degradation
172039560	DENPVLFFEHVLLYNLK	ref|NC_010546.1|:c4805260-4804277_pyruvate_dehydrogenase_E1_component_beta_subunit_[Cyanothece_sp._ATCC_51142	si_0026x0.1xAmino_Acids_and_DerivativesxBranched-chain_amino_acidsxIsoleucine_degradation
172039560	DLYKKYGELR	ref|NC_010546.1|:c4805260-4804277_pyruvate_dehydrogenase_E1_component_beta_subunit_[Cyanothece_sp._ATCC_51142	si_0026x0.1xAmino_Acids_and_DerivativesxBranched-chain_amino_acidsxIsoleucine_degradation
172039560	DVTILTYSR	ref|NC_010546.1|:c4805260-4804277_pyruvate_dehydrogenase_E1_component_beta_subunit_[Cyanothece_sp._ATCC_51142	si_0026x0.1xAmino_Acids_and_DerivativesxBranched-chain_amino_acidsxIsoleucine_degradation
172039560	EGKDVTILTYSR	ref|NC_010546.1|:c4805260-4804277_pyruvate_dehydrogenase_E1_component_beta_subunit_[Cyanothece_sp._ATCC_51142	si_0026x0.1xAmino_Acids_and_DerivativesxBranched-chain_amino_acidsxIsoleucine_degradation
172039560	ENLPDNEYIVPLDK	ref|NC_010546.1|:c4805260-4804277_pyruvate_dehydrogenase_E1_component_beta_subunit_[Cyanothece_sp._ATCC_51142	si_0026x0.1xAmino_Acids_and_DerivativesxBranched-chain_amino_acidsxIsoleucine_degradation
172039560	ENLPDNEYIVPLDKAEIVR	ref|NC_010546.1|:c4805260-4804277_pyruvate_dehydrogenase_E1_component_beta_subunit_[Cyanothece_sp._ATCC_51142	si_0026x0.1xAmino_Acids_and_DerivativesxBranched-chain_amino_acidsxIsoleucine_degradation
172039560	LEAYFHAVPGLK	ref|NC_010546.1|:c4805260-4804277_pyruvate_dehydrogenase_E1_component_beta_subunit_[Cyanothece_sp._ATCC_51142	si_0026x0.1xAmino_Acids_and_DerivativesxBranched-chain_amino_acidsxIsoleucine_degradation
172039560	LSSQDIPTPYNGMLER	ref|NC_010546.1|:c4805260-4804277_pyruvate_dehydrogenase_E1_component_beta_subunit_[Cyanothece_sp._ATCC_51142	si_0026x0.1xAmino_Acids_and_DerivativesxBranched-chain_amino_acidsxIsoleucine_degradation
172039560	QAIDEEMGRDDTVFVLGEDVGHYGGSYK	ref|NC_010546.1|:c4805260-4804277_pyruvate_dehydrogenase_E1_component_beta_subunit_[Cyanothece_sp._ATCC_51142	si_0026x0.1xAmino_Acids_and_DerivativesxBranched-chain_amino_acidsxIsoleucine_degradation
172039560	QAIDEEMGRDDTVFVLGEDVGHYGGSYKVTK	ref|NC_010546.1|:c4805260-4804277_pyruvate_dehydrogenase_E1_component_beta_subunit_[Cyanothece_sp._ATCC_51142	si_0026x0.1xAmino_Acids_and_DerivativesxBranched-chain_amino_acidsxIsoleucine_degradation
172039560	QIESQGYDPEIIDLISLKPFDLQTIGDSIR	ref|NC_010546.1|:c4805260-4804277_pyruvate_dehydrogenase_E1_component_beta_subunit_[Cyanothece_sp._ATCC_51142	si_0026x0.1xAmino_Acids_and_DerivativesxBranched-chain_amino_acidsxIsoleucine_degradation
172039560	QIESQGYDPEIIDLISLKPFDLQTIGDSIRK	ref|NC_010546.1|:c4805260-4804277_pyruvate_dehydrogenase_E1_component_beta_subunit_[Cyanothece_sp._ATCC_51142	si_0026x0.1xAmino_Acids_and_DerivativesxBranched-chain_amino_acidsxIsoleucine_degradation
172039560	YTSGGNFKIPMVIR	ref|NC_010546.1|:c4805260-4804277_pyruvate_dehydrogenase_E1_component_beta_subunit_[Cyanothece_sp._ATCC_51142	si_0026x0.1xAmino_Acids_and_DerivativesxBranched-chain_amino_acidsxIsoleucine_degradation
172039560	YTSGGNFKIPMVIRGPGGVGR	ref|NC_010546.1|:c4805260-4804277_pyruvate_dehydrogenase_E1_component_beta_subunit_[Cyanothece_sp._ATCC_51142	si_0026x0.1xAmino_Acids_and_DerivativesxBranched-chain_amino_acidsxIsoleucine_degradation
172039559	GGAQLTIQLKPTEDVQTISQEDLEAAK	ref|NC_010546.1|:c4804149-4802737_preprotein_translocase_subunit_SecD_[Cyanothece_sp._ATCC_51142	si_0811x1xRespirationxElectron_donating_reactionsxNiFe_hydrogenase_maturation
172039559	GGSLPFPVEVVENR	ref|NC_010546.1|:c4804149-4802737_preprotein_translocase_subunit_SecD_[Cyanothece_sp._ATCC_51142	si_0811x1xRespirationxElectron_donating_reactionsxNiFe_hydrogenase_maturation
172039559	IAELTESIEESNQALLALFESVGLSGK	ref|NC_010546.1|:c4804149-4802737_preprotein_translocase_subunit_SecD_[Cyanothece_sp._ATCC_51142	si_0811x1xRespirationxElectron_donating_reactionsxNiFe_hydrogenase_maturation
172039559	IVVQLPGVTDPEQAER	ref|NC_010546.1|:c4804149-4802737_preprotein_translocase_subunit_SecD_[Cyanothece_sp._ATCC_51142	si_0811x1xRespirationxElectron_donating_reactionsxNiFe_hydrogenase_maturation
172039559	QGEPTPEEEQR	ref|NC_010546.1|:c4804149-4802737_preprotein_translocase_subunit_SecD_[Cyanothece_sp._ATCC_51142	si_0811x1xRespirationxElectron_donating_reactionsxNiFe_hydrogenase_maturation
172039559	QGTEGQLPVEFNIR	ref|NC_010546.1|:c4804149-4802737_preprotein_translocase_subunit_SecD_[Cyanothece_sp._ATCC_51142	si_0811x1xRespirationxElectron_donating_reactionsxNiFe_hydrogenase_maturation
172039559	TLYSGVESGFYR	ref|NC_010546.1|:c4804149-4802737_preprotein_translocase_subunit_SecD_[Cyanothece_sp._ATCC_51142	si_0811x1xRespirationxElectron_donating_reactionsxNiFe_hydrogenase_maturation
172039559	VDGLGVAEPVVQTLGQDK	ref|NC_010546.1|:c4804149-4802737_preprotein_translocase_subunit_SecD_[Cyanothece_sp._ATCC_51142	si_0811x1xRespirationxElectron_donating_reactionsxNiFe_hydrogenase_maturation
172039559	VDGLGVAEPVVQTLGQDKIVVQLPGVTDPEQAER	ref|NC_010546.1|:c4804149-4802737_preprotein_translocase_subunit_SecD_[Cyanothece_sp._ATCC_51142	si_0811x1xRespirationxElectron_donating_reactionsxNiFe_hydrogenase_maturation
172039559	VLGGTAQLEFR	ref|NC_010546.1|:c4804149-4802737_preprotein_translocase_subunit_SecD_[Cyanothece_sp._ATCC_51142	si_0811x1xRespirationxElectron_donating_reactionsxNiFe_hydrogenase_maturation
172039559	YGPTQGTEWEVIIDFDNEGGQK	ref|NC_010546.1|:c4804149-4802737_preprotein_translocase_subunit_SecD_[Cyanothece_sp._ATCC_51142	si_0811x1xRespirationxElectron_donating_reactionsxNiFe_hydrogenase_maturation
172039558	APLRPGLDFIGGTR	ref|NC_010546.1|:c4802705-4801779_preprotein_translocase_subunit_SecF_[Cyanothece_sp._ATCC_51142	si_0654x1xPotassium_metabolismxUnclassified_potassium_metabolismxPotassium_homeostasis
172039558	DILNQQELGNSTIQVLEGNILSIR	ref|NC_010546.1|:c4802705-4801779_preprotein_translocase_subunit_SecF_[Cyanothece_sp._ATCC_51142	si_0654x1xPotassium_metabolismxUnclassified_potassium_metabolismxPotassium_homeostasis
172039558	ENTDRYSEELSINEIVENSVNQTLGR	ref|NC_010546.1|:c4802705-4801779_preprotein_translocase_subunit_SecF_[Cyanothece_sp._ATCC_51142	si_0654x1xPotassium_metabolismxUnclassified_potassium_metabolismxPotassium_homeostasis
172039558	LQLQLACAVEGTCEQSINVGEVR	ref|NC_010546.1|:c4802705-4801779_preprotein_translocase_subunit_SecF_[Cyanothece_sp._ATCC_51142	si_0654x1xPotassium_metabolismxUnclassified_potassium_metabolismxPotassium_homeostasis
172039558	TQLQQELNDK	ref|NC_010546.1|:c4802705-4801779_preprotein_translocase_subunit_SecF_[Cyanothece_sp._ATCC_51142	si_0654x1xPotassium_metabolismxUnclassified_potassium_metabolismxPotassium_homeostasis
172039558	YSEELSINEIVENSVNQTLGR	ref|NC_010546.1|:c4802705-4801779_preprotein_translocase_subunit_SecF_[Cyanothece_sp._ATCC_51142	si_0654x1xPotassium_metabolismxUnclassified_potassium_metabolismxPotassium_homeostasis
172039552	AAITNNPDKEK	ref|NC_010546.1|:c4792456-4791407_recombinase_A_[Cyanothece_sp._ATCC_51142	si_0277x0.1xClustering-based_subsystemsxTwo_related_proteasesxCBSS-257314.1.peg.676
172039552	AEIEGEMGDTQVGLQAR	ref|NC_010546.1|:c4792456-4791407_recombinase_A_[Cyanothece_sp._ATCC_51142	si_0277x0.1xClustering-based_subsystemsxTwo_related_proteasesxCBSS-257314.1.peg.676
172039552	ALGLVLNQIER	ref|NC_010546.1|:c4792456-4791407_recombinase_A_[Cyanothece_sp._ATCC_51142	si_0277x0.1xClustering-based_subsystemsxTwo_related_proteasesxCBSS-257314.1.peg.676
172039552	IAEFDIIFGQGISR	ref|NC_010546.1|:c4792456-4791407_recombinase_A_[Cyanothece_sp._ATCC_51142	si_0277x0.1xClustering-based_subsystemsxTwo_related_proteasesxCBSS-257314.1.peg.676
172039552	IAETIEQQVR	ref|NC_010546.1|:c4792456-4791407_recombinase_A_[Cyanothece_sp._ATCC_51142	si_0277x0.1xClustering-based_subsystemsxTwo_related_proteasesxCBSS-257314.1.peg.676
172039552	SAAVDVVVIDSVAALVPR	ref|NC_010546.1|:c4792456-4791407_recombinase_A_[Cyanothece_sp._ATCC_51142	si_0277x0.1xClustering-based_subsystemsxTwo_related_proteasesxCBSS-257314.1.peg.676
172039552	TTLALHAIAEVQK	ref|NC_010546.1|:c4792456-4791407_recombinase_A_[Cyanothece_sp._ATCC_51142	si_0277x0.1xClustering-based_subsystemsxTwo_related_proteasesxCBSS-257314.1.peg.676
172039552	VVEIYGPESSGK	ref|NC_010546.1|:c4792456-4791407_recombinase_A_[Cyanothece_sp._ATCC_51142	si_0277x0.1xClustering-based_subsystemsxTwo_related_proteasesxCBSS-257314.1.peg.676
172039551	GIPVATVAIGNAQNAGLLAVQILASHDATLLK	ref|NC_010546.1|:4790755-4791285_phosphoribosylaminoimidazole_carboxylase_[Cyanothece_sp._ATCC_51142	si_0600x1xNucleosides_and_NucleotidesxPurinesxDe_Novo_Purine_Biosynthesis
172039551	GIPVATVAIGNAQNAGLLAVQILASHDATLLKK	ref|NC_010546.1|:4790755-4791285_phosphoribosylaminoimidazole_carboxylase_[Cyanothece_sp._ATCC_51142	si_0600x1xNucleosides_and_NucleotidesxPurinesxDe_Novo_Purine_Biosynthesis
172039551	GLKVIIAGAGGAAHLPGMVASLTPLPVIGVPVSTR	ref|NC_010546.1|:4790755-4791285_phosphoribosylaminoimidazole_carboxylase_[Cyanothece_sp._ATCC_51142	si_0600x1xNucleosides_and_NucleotidesxPurinesxDe_Novo_Purine_Biosynthesis
172039551	HLQGVDSLYSIVQMPR	ref|NC_010546.1|:4790755-4791285_phosphoribosylaminoimidazole_carboxylase_[Cyanothece_sp._ATCC_51142	si_0600x1xNucleosides_and_NucleotidesxPurinesxDe_Novo_Purine_Biosynthesis
172039551	KVQDYRQELEQMVLDKQENLGK	ref|NC_010546.1|:4790755-4791285_phosphoribosylaminoimidazole_carboxylase_[Cyanothece_sp._ATCC_51142	si_0600x1xNucleosides_and_NucleotidesxPurinesxDe_Novo_Purine_Biosynthesis
172039551	LGYEAYLKEMKD	ref|NC_010546.1|:4790755-4791285_phosphoribosylaminoimidazole_carboxylase_[Cyanothece_sp._ATCC_51142	si_0600x1xNucleosides_and_NucleotidesxPurinesxDe_Novo_Purine_Biosynthesis
172039551	TPEKMVNYAK	ref|NC_010546.1|:4790755-4791285_phosphoribosylaminoimidazole_carboxylase_[Cyanothece_sp._ATCC_51142	si_0600x1xNucleosides_and_NucleotidesxPurinesxDe_Novo_Purine_Biosynthesis
172039551	TSSSAVIGIIMGSDSDLPTMEK	ref|NC_010546.1|:4790755-4791285_phosphoribosylaminoimidazole_carboxylase_[Cyanothece_sp._ATCC_51142	si_0600x1xNucleosides_and_NucleotidesxPurinesxDe_Novo_Purine_Biosynthesis
172039551	VQDYRQELEQMVLDKQENLGK	ref|NC_010546.1|:4790755-4791285_phosphoribosylaminoimidazole_carboxylase_[Cyanothece_sp._ATCC_51142	si_0600x1xNucleosides_and_NucleotidesxPurinesxDe_Novo_Purine_Biosynthesis
172039551	VQDYRQELEQMVLDKQENLGKLGYEAYLKEMKD	ref|NC_010546.1|:4790755-4791285_phosphoribosylaminoimidazole_carboxylase_[Cyanothece_sp._ATCC_51142	si_0600x1xNucleosides_and_NucleotidesxPurinesxDe_Novo_Purine_Biosynthesis
172039550	GIVASLGHSQANAK	ref|NC_010546.1|:c4790583-4789423_N-acetyl-glucosamine-6-phosphate_deacetylase_[Cyanothece_sp._ATCC_51142	si_0055x0.3xCarbohydratesxAminosugarsxChitin_and_N-acetylglucosamine_utilization
172039550	IITLAPELDITNEVIPYLSSR	ref|NC_010546.1|:c4790583-4789423_N-acetyl-glucosamine-6-phosphate_deacetylase_[Cyanothece_sp._ATCC_51142	si_0055x0.3xCarbohydratesxAminosugarsxChitin_and_N-acetylglucosamine_utilization
172039550	IQTEENVPTAK	ref|NC_010546.1|:c4790583-4789423_N-acetyl-glucosamine-6-phosphate_deacetylase_[Cyanothece_sp._ATCC_51142	si_0055x0.3xCarbohydratesxAminosugarsxChitin_and_N-acetylglucosamine_utilization
172039550	LANGTLAGTTLPLLVGVK	ref|NC_010546.1|:c4790583-4789423_N-acetyl-glucosamine-6-phosphate_deacetylase_[Cyanothece_sp._ATCC_51142	si_0055x0.3xCarbohydratesxAminosugarsxChitin_and_N-acetylglucosamine_utilization
172039550	MLKDITIINAK	ref|NC_010546.1|:c4790583-4789423_N-acetyl-glucosamine-6-phosphate_deacetylase_[Cyanothece_sp._ATCC_51142	si_0055x0.3xCarbohydratesxAminosugarsxChitin_and_N-acetylglucosamine_utilization
172039550	VLGVHLEGPFLNHEK	ref|NC_010546.1|:c4790583-4789423_N-acetyl-glucosamine-6-phosphate_deacetylase_[Cyanothece_sp._ATCC_51142	si_0055x0.3xCarbohydratesxAminosugarsxChitin_and_N-acetylglucosamine_utilization
172039549	FGNNEGMTPEIQTNLLER	ref|NC_010546.1|:c4789332-4788229_rfrA_pentapeptide_repeat-containing_protein_[Cyanothece_sp._ATCC_51142	si_0962x1xNo_Function_MatchxNo_Function_MatchxNone
172039549	FSGADLSGAYLGNANLQQADFYR	ref|NC_010546.1|:c4789332-4788229_rfrA_pentapeptide_repeat-containing_protein_[Cyanothece_sp._ATCC_51142	si_0962x1xNo_Function_MatchxNo_Function_MatchxNone
172039549	GANLQEVNLTQTNLSGALVQGSK	ref|NC_010546.1|:c4789332-4788229_rfrA_pentapeptide_repeat-containing_protein_[Cyanothece_sp._ATCC_51142	si_0962x1xNo_Function_MatchxNo_Function_MatchxNone
172039549	GANLTDADLSEAILSYTR	ref|NC_010546.1|:c4789332-4788229_rfrA_pentapeptide_repeat-containing_protein_[Cyanothece_sp._ATCC_51142	si_0962x1xNo_Function_MatchxNo_Function_MatchxNone
172039549	IDLAGGNFLGTELSGIELSGANLTHSNFR	ref|NC_010546.1|:c4789332-4788229_rfrA_pentapeptide_repeat-containing_protein_[Cyanothece_sp._ATCC_51142	si_0962x1xNo_Function_MatchxNo_Function_MatchxNone
172039549	KIDSPTTNVEPQHLADLHQLINNIYDIK	ref|NC_010546.1|:c4789332-4788229_rfrA_pentapeptide_repeat-containing_protein_[Cyanothece_sp._ATCC_51142	si_0962x1xNo_Function_MatchxNo_Function_MatchxNone
172039549	QRLSPEISMIQLTSK	ref|NC_010546.1|:c4789332-4788229_rfrA_pentapeptide_repeat-containing_protein_[Cyanothece_sp._ATCC_51142	si_0962x1xNo_Function_MatchxNo_Function_MatchxNone
172039549	SESAPSLHLHTAYNPYPK	ref|NC_010546.1|:c4789332-4788229_rfrA_pentapeptide_repeat-containing_protein_[Cyanothece_sp._ATCC_51142	si_0962x1xNo_Function_MatchxNo_Function_MatchxNone
172039549	SSLALANLIGADLR	ref|NC_010546.1|:c4789332-4788229_rfrA_pentapeptide_repeat-containing_protein_[Cyanothece_sp._ATCC_51142	si_0962x1xNo_Function_MatchxNo_Function_MatchxNone
172039549	TNNLLELIK	ref|NC_010546.1|:c4789332-4788229_rfrA_pentapeptide_repeat-containing_protein_[Cyanothece_sp._ATCC_51142	si_0962x1xNo_Function_MatchxNo_Function_MatchxNone
172039548	QPKEENSTDNIEVPDIMFPSESELEEASQDDTELSK	ref|NC_010546.1|:4787846-4788211_hypothetical_protein_cce_4635_[Cyanothece_sp._ATCC_51142	si_0962x1xNo_Function_MatchxNo_Function_MatchxNone
172039547	ELGLNPFTNWTR	ref|NC_010546.1|:4786311-4787810_zeta-carotene_desaturase-like_protein_[Cyanothece_sp._ATCC_51142	si_0454x1xFatty_Acids,_Lipids,_and_IsoprenoidsxIsoprenoidsxCarotenoids
172039547	GTVGEMIFKPWVEKIETLGGK	ref|NC_010546.1|:4786311-4787810_zeta-carotene_desaturase-like_protein_[Cyanothece_sp._ATCC_51142	si_0454x1xFatty_Acids,_Lipids,_and_IsoprenoidsxIsoprenoidsxCarotenoids
172039547	LSALPLLYSLLDFDNSPEAWER	ref|NC_010546.1|:4786311-4787810_zeta-carotene_desaturase-like_protein_[Cyanothece_sp._ATCC_51142	si_0454x1xFatty_Acids,_Lipids,_and_IsoprenoidsxIsoprenoidsxCarotenoids
172039547	SSQYSPAGLEVESPIFQDKPLLPTPLGTFLYTK	ref|NC_010546.1|:4786311-4787810_zeta-carotene_desaturase-like_protein_[Cyanothece_sp._ATCC_51142	si_0454x1xFatty_Acids,_Lipids,_and_IsoprenoidsxIsoprenoidsxCarotenoids
172039547	VLNQYPEFYNLSNLGGIDVLATR	ref|NC_010546.1|:4786311-4787810_zeta-carotene_desaturase-like_protein_[Cyanothece_sp._ATCC_51142	si_0454x1xFatty_Acids,_Lipids,_and_IsoprenoidsxIsoprenoidsxCarotenoids
172039547	VTDIIINNKGTAK	ref|NC_010546.1|:4786311-4787810_zeta-carotene_desaturase-like_protein_[Cyanothece_sp._ATCC_51142	si_0454x1xFatty_Acids,_Lipids,_and_IsoprenoidsxIsoprenoidsxCarotenoids
172039542	ALEIIDFYADRK	ref|NC_010546.1|:4783153-4785090_hypothetical_protein_cce_4629_[Cyanothece_sp._ATCC_51142	si_0962x1xNo_Function_MatchxNo_Function_MatchxNone
172039542	DYGGGNVAMGSSSAR	ref|NC_010546.1|:4783153-4785090_hypothetical_protein_cce_4629_[Cyanothece_sp._ATCC_51142	si_0962x1xNo_Function_MatchxNo_Function_MatchxNone
172039541	GVAQAQTQFNQQGLNAR	ref|NC_010546.1|:4781692-4783146_hypothetical_protein_cce_4628_[Cyanothece_sp._ATCC_51142	si_0962x1xNo_Function_MatchxNo_Function_MatchxNone
172039541	LSNPKPLLGGDALYNPATLK	ref|NC_010546.1|:4781692-4783146_hypothetical_protein_cce_4628_[Cyanothece_sp._ATCC_51142	si_0962x1xNo_Function_MatchxNo_Function_MatchxNone
172039541	LSQGGVTGLVLAVPWFAK	ref|NC_010546.1|:4781692-4783146_hypothetical_protein_cce_4628_[Cyanothece_sp._ATCC_51142	si_0962x1xNo_Function_MatchxNo_Function_MatchxNone
172039541	NYEEADQHFSEAVK	ref|NC_010546.1|:4781692-4783146_hypothetical_protein_cce_4628_[Cyanothece_sp._ATCC_51142	si_0962x1xNo_Function_MatchxNo_Function_MatchxNone
172039540	AFETYKAK	ref|NC_010546.1|:4779457-4781469_transketolase_[Cyanothece_sp._ATCC_51142	si_0048x0.3xAmino_Acids_and_DerivativesxProline_and_4-hydroxyprolinexA_Hypothetical_Protein_Related_to_Proline_Metabolism
172039540	AFETYKAKYPAEAAEFER	ref|NC_010546.1|:4779457-4781469_transketolase_[Cyanothece_sp._ATCC_51142	si_0048x0.3xAmino_Acids_and_DerivativesxProline_and_4-hydroxyprolinexA_Hypothetical_Protein_Related_to_Proline_Metabolism
172039540	AKQNAPTLMAF	ref|NC_010546.1|:4779457-4781469_transketolase_[Cyanothece_sp._ATCC_51142	si_0048x0.3xAmino_Acids_and_DerivativesxProline_and_4-hydroxyprolinexA_Hypothetical_Protein_Related_to_Proline_Metabolism
172039540	AKQNAPTLMAFTR	ref|NC_010546.1|:4779457-4781469_transketolase_[Cyanothece_sp._ATCC_51142	si_0048x0.3xAmino_Acids_and_DerivativesxProline_and_4-hydroxyprolinexA_Hypothetical_Protein_Related_to_Proline_Metabolism
172039540	AKSGHPGLPMGAAPMAYVLWDK	ref|NC_010546.1|:4779457-4781469_transketolase_[Cyanothece_sp._ATCC_51142	si_0048x0.3xAmino_Acids_and_DerivativesxProline_and_4-hydroxyprolinexA_Hypothetical_Protein_Related_to_Proline_Metabolism
172039540	AKYPAEAAEFER	ref|NC_010546.1|:4779457-4781469_transketolase_[Cyanothece_sp._ATCC_51142	si_0048x0.3xAmino_Acids_and_DerivativesxProline_and_4-hydroxyprolinexA_Hypothetical_Protein_Related_to_Proline_Metabolism
172039540	EGWEKELPTFTPDDAANATR	ref|NC_010546.1|:4779457-4781469_transketolase_[Cyanothece_sp._ATCC_51142	si_0048x0.3xAmino_Acids_and_DerivativesxProline_and_4-hydroxyprolinexA_Hypothetical_Protein_Related_to_Proline_Metabolism
172039540	EGWEKELPTFTPDDAANATRK	ref|NC_010546.1|:4779457-4781469_transketolase_[Cyanothece_sp._ATCC_51142	si_0048x0.3xAmino_Acids_and_DerivativesxProline_and_4-hydroxyprolinexA_Hypothetical_Protein_Related_to_Proline_Metabolism
172039540	ELPTFTPDDAANATR	ref|NC_010546.1|:4779457-4781469_transketolase_[Cyanothece_sp._ATCC_51142	si_0048x0.3xAmino_Acids_and_DerivativesxProline_and_4-hydroxyprolinexA_Hypothetical_Protein_Related_to_Proline_Metabolism
172039540	ELPTFTPDDAANATRK	ref|NC_010546.1|:4779457-4781469_transketolase_[Cyanothece_sp._ATCC_51142	si_0048x0.3xAmino_Acids_and_DerivativesxProline_and_4-hydroxyprolinexA_Hypothetical_Protein_Related_to_Proline_Metabolism
172039540	FEAYGWHVLHVENGNTDLDGIAK	ref|NC_010546.1|:4779457-4781469_transketolase_[Cyanothece_sp._ATCC_51142	si_0048x0.3xAmino_Acids_and_DerivativesxProline_and_4-hydroxyprolinexA_Hypothetical_Protein_Related_to_Proline_Metabolism
172039540	FGFSVDNVLAK	ref|NC_010546.1|:4779457-4781469_transketolase_[Cyanothece_sp._ATCC_51142	si_0048x0.3xAmino_Acids_and_DerivativesxProline_and_4-hydroxyprolinexA_Hypothetical_Protein_Related_to_Proline_Metabolism
172039540	FLAVDAVEK	ref|NC_010546.1|:4779457-4781469_transketolase_[Cyanothece_sp._ATCC_51142	si_0048x0.3xAmino_Acids_and_DerivativesxProline_and_4-hydroxyprolinexA_Hypothetical_Protein_Related_to_Proline_Metabolism
172039540	FLAVDAVEKAK	ref|NC_010546.1|:4779457-4781469_transketolase_[Cyanothece_sp._ATCC_51142	si_0048x0.3xAmino_Acids_and_DerivativesxProline_and_4-hydroxyprolinexA_Hypothetical_Protein_Related_to_Proline_Metabolism
172039540	GANYEEEWNKAFETYK	ref|NC_010546.1|:4779457-4781469_transketolase_[Cyanothece_sp._ATCC_51142	si_0048x0.3xAmino_Acids_and_DerivativesxProline_and_4-hydroxyprolinexA_Hypothetical_Protein_Related_to_Proline_Metabolism
172039540	GANYEEEWNKAFETYKAK	ref|NC_010546.1|:4779457-4781469_transketolase_[Cyanothece_sp._ATCC_51142	si_0048x0.3xAmino_Acids_and_DerivativesxProline_and_4-hydroxyprolinexA_Hypothetical_Protein_Related_to_Proline_Metabolism
172039540	GANYEEEWNKAFETYKAKYPAEAAEFER	ref|NC_010546.1|:4779457-4781469_transketolase_[Cyanothece_sp._ATCC_51142	si_0048x0.3xAmino_Acids_and_DerivativesxProline_and_4-hydroxyprolinexA_Hypothetical_Protein_Related_to_Proline_Metabolism
172039540	GAYTIVDCDGTPDIILIGTGSEVSLCVTAAEKLTAEGK	ref|NC_010546.1|:4779457-4781469_transketolase_[Cyanothece_sp._ATCC_51142	si_0048x0.3xAmino_Acids_and_DerivativesxProline_and_4-hydroxyprolinexA_Hypothetical_Protein_Related_to_Proline_Metabolism
172039540	HNLGWDHEPFVVPQDVLSHMNK	ref|NC_010546.1|:4779457-4781469_transketolase_[Cyanothece_sp._ATCC_51142	si_0048x0.3xAmino_Acids_and_DerivativesxProline_and_4-hydroxyprolinexA_Hypothetical_Protein_Related_to_Proline_Metabolism
172039540	HSAAILNKLAPVIPELIGGSADLTHSNLTELK	ref|NC_010546.1|:4779457-4781469_transketolase_[Cyanothece_sp._ATCC_51142	si_0048x0.3xAmino_Acids_and_DerivativesxProline_and_4-hydroxyprolinexA_Hypothetical_Protein_Related_to_Proline_Metabolism
172039540	IAIEKAKQNAPTLMAFTR	ref|NC_010546.1|:4779457-4781469_transketolase_[Cyanothece_sp._ATCC_51142	si_0048x0.3xAmino_Acids_and_DerivativesxProline_and_4-hydroxyprolinexA_Hypothetical_Protein_Related_to_Proline_Metabolism
172039540	LAPVIPELIGGSADLTHSNLTELK	ref|NC_010546.1|:4779457-4781469_transketolase_[Cyanothece_sp._ATCC_51142	si_0048x0.3xAmino_Acids_and_DerivativesxProline_and_4-hydroxyprolinexA_Hypothetical_Protein_Related_to_Proline_Metabolism
172039540	LAPVIPELIGGSADLTHSNLTELKVSGDFQK	ref|NC_010546.1|:4779457-4781469_transketolase_[Cyanothece_sp._ATCC_51142	si_0048x0.3xAmino_Acids_and_DerivativesxProline_and_4-hydroxyprolinexA_Hypothetical_Protein_Related_to_Proline_Metabolism
172039540	LIALYDDNHISIDGSTDVAFTEDVSK	ref|NC_010546.1|:4779457-4781469_transketolase_[Cyanothece_sp._ATCC_51142	si_0048x0.3xAmino_Acids_and_DerivativesxProline_and_4-hydroxyprolinexA_Hypothetical_Protein_Related_to_Proline_Metabolism
172039540	LIALYDDNHISIDGSTDVAFTEDVSKR	ref|NC_010546.1|:4779457-4781469_transketolase_[Cyanothece_sp._ATCC_51142	si_0048x0.3xAmino_Acids_and_DerivativesxProline_and_4-hydroxyprolinexA_Hypothetical_Protein_Related_to_Proline_Metabolism
172039540	LSALSQAGVIWVMTHDSIGQGEDGPTHQPVEVLASLR	ref|NC_010546.1|:4779457-4781469_transketolase_[Cyanothece_sp._ATCC_51142	si_0048x0.3xAmino_Acids_and_DerivativesxProline_and_4-hydroxyprolinexA_Hypothetical_Protein_Related_to_Proline_Metabolism
172039540	MAYVLWDKFMR	ref|NC_010546.1|:4779457-4781469_transketolase_[Cyanothece_sp._ATCC_51142	si_0048x0.3xAmino_Acids_and_DerivativesxProline_and_4-hydroxyprolinexA_Hypothetical_Protein_Related_to_Proline_Metabolism
172039540	MGAAPMAYVLWDK	ref|NC_010546.1|:4779457-4781469_transketolase_[Cyanothece_sp._ATCC_51142	si_0048x0.3xAmino_Acids_and_DerivativesxProline_and_4-hydroxyprolinexA_Hypothetical_Protein_Related_to_Proline_Metabolism
172039540	MGAAPMAYVLWDKFMR	ref|NC_010546.1|:4779457-4781469_transketolase_[Cyanothece_sp._ATCC_51142	si_0048x0.3xAmino_Acids_and_DerivativesxProline_and_4-hydroxyprolinexA_Hypothetical_Protein_Related_to_Proline_Metabolism
172039540	QDVLSHMNK	ref|NC_010546.1|:4779457-4781469_transketolase_[Cyanothece_sp._ATCC_51142	si_0048x0.3xAmino_Acids_and_DerivativesxProline_and_4-hydroxyprolinexA_Hypothetical_Protein_Related_to_Proline_Metabolism
172039540	QNAPTLMAFTR	ref|NC_010546.1|:4779457-4781469_transketolase_[Cyanothece_sp._ATCC_51142	si_0048x0.3xAmino_Acids_and_DerivativesxProline_and_4-hydroxyprolinexA_Hypothetical_Protein_Related_to_Proline_Metabolism
172039540	QNTAGVHGAALGPDEVALTR	ref|NC_010546.1|:4779457-4781469_transketolase_[Cyanothece_sp._ATCC_51142	si_0048x0.3xAmino_Acids_and_DerivativesxProline_and_4-hydroxyprolinexA_Hypothetical_Protein_Related_to_Proline_Metabolism
172039540	QNVPNLPGTSIEGVTK	ref|NC_010546.1|:4779457-4781469_transketolase_[Cyanothece_sp._ATCC_51142	si_0048x0.3xAmino_Acids_and_DerivativesxProline_and_4-hydroxyprolinexA_Hypothetical_Protein_Related_to_Proline_Metabolism
172039540	RFEAYGWHVLHVENGNTDLDGIAK	ref|NC_010546.1|:4779457-4781469_transketolase_[Cyanothece_sp._ATCC_51142	si_0048x0.3xAmino_Acids_and_DerivativesxProline_and_4-hydroxyprolinexA_Hypothetical_Protein_Related_to_Proline_Metabolism
172039540	SGHPGLPMGAAPMAYVLWDK	ref|NC_010546.1|:4779457-4781469_transketolase_[Cyanothece_sp._ATCC_51142	si_0048x0.3xAmino_Acids_and_DerivativesxProline_and_4-hydroxyprolinexA_Hypothetical_Protein_Related_to_Proline_Metabolism
172039540	SGHPGLPMGAAPMAYVLWDKFMR	ref|NC_010546.1|:4779457-4781469_transketolase_[Cyanothece_sp._ATCC_51142	si_0048x0.3xAmino_Acids_and_DerivativesxProline_and_4-hydroxyprolinexA_Hypothetical_Protein_Related_to_Proline_Metabolism
172039540	VRVVSMPSWELFEAQDEAYKESVLPK	ref|NC_010546.1|:4779457-4781469_transketolase_[Cyanothece_sp._ATCC_51142	si_0048x0.3xAmino_Acids_and_DerivativesxProline_and_4-hydroxyprolinexA_Hypothetical_Protein_Related_to_Proline_Metabolism
172039540	VSGDFQKGQYGNR	ref|NC_010546.1|:4779457-4781469_transketolase_[Cyanothece_sp._ATCC_51142	si_0048x0.3xAmino_Acids_and_DerivativesxProline_and_4-hydroxyprolinexA_Hypothetical_Protein_Related_to_Proline_Metabolism
172039540	VSVEAGVSFGWAK	ref|NC_010546.1|:4779457-4781469_transketolase_[Cyanothece_sp._ATCC_51142	si_0048x0.3xAmino_Acids_and_DerivativesxProline_and_4-hydroxyprolinexA_Hypothetical_Protein_Related_to_Proline_Metabolism
172039540	VTDKPSMIKVTTTIGYGSPNKQNTAGVHGAALGPDEVALTR	ref|NC_010546.1|:4779457-4781469_transketolase_[Cyanothece_sp._ATCC_51142	si_0048x0.3xAmino_Acids_and_DerivativesxProline_and_4-hydroxyprolinexA_Hypothetical_Protein_Related_to_Proline_Metabolism
172039540	VTTTIGYGSPNK	ref|NC_010546.1|:4779457-4781469_transketolase_[Cyanothece_sp._ATCC_51142	si_0048x0.3xAmino_Acids_and_DerivativesxProline_and_4-hydroxyprolinexA_Hypothetical_Protein_Related_to_Proline_Metabolism
172039540	VTTTIGYGSPNKQNTAGVHGAALGPDEVALTR	ref|NC_010546.1|:4779457-4781469_transketolase_[Cyanothece_sp._ATCC_51142	si_0048x0.3xAmino_Acids_and_DerivativesxProline_and_4-hydroxyprolinexA_Hypothetical_Protein_Related_to_Proline_Metabolism
172039540	VVSMPSWELFEAQDEAYKESVLPK	ref|NC_010546.1|:4779457-4781469_transketolase_[Cyanothece_sp._ATCC_51142	si_0048x0.3xAmino_Acids_and_DerivativesxProline_and_4-hydroxyprolinexA_Hypothetical_Protein_Related_to_Proline_Metabolism
172039540	YGATFLIFTDYMR	ref|NC_010546.1|:4779457-4781469_transketolase_[Cyanothece_sp._ATCC_51142	si_0048x0.3xAmino_Acids_and_DerivativesxProline_and_4-hydroxyprolinexA_Hypothetical_Protein_Related_to_Proline_Metabolism
172039540	YLSGQLREGWEK	ref|NC_010546.1|:4779457-4781469_transketolase_[Cyanothece_sp._ATCC_51142	si_0048x0.3xAmino_Acids_and_DerivativesxProline_and_4-hydroxyprolinexA_Hypothetical_Protein_Related_to_Proline_Metabolism
172039540	YLSGQLREGWEKELPTFTPDDAANATR	ref|NC_010546.1|:4779457-4781469_transketolase_[Cyanothece_sp._ATCC_51142	si_0048x0.3xAmino_Acids_and_DerivativesxProline_and_4-hydroxyprolinexA_Hypothetical_Protein_Related_to_Proline_Metabolism
172039540	YLSGQLREGWEKELPTFTPDDAANATRK	ref|NC_010546.1|:4779457-4781469_transketolase_[Cyanothece_sp._ATCC_51142	si_0048x0.3xAmino_Acids_and_DerivativesxProline_and_4-hydroxyprolinexA_Hypothetical_Protein_Related_to_Proline_Metabolism
172039540	YPAEAAEFER	ref|NC_010546.1|:4779457-4781469_transketolase_[Cyanothece_sp._ATCC_51142	si_0048x0.3xAmino_Acids_and_DerivativesxProline_and_4-hydroxyprolinexA_Hypothetical_Protein_Related_to_Proline_Metabolism
172039540	YVGTEGDTVSIDTFGASAPGATCMEKFGFSVDNVLA	ref|NC_010546.1|:4779457-4781469_transketolase_[Cyanothece_sp._ATCC_51142	si_0048x0.3xAmino_Acids_and_DerivativesxProline_and_4-hydroxyprolinexA_Hypothetical_Protein_Related_to_Proline_Metabolism
172039539	AFADTHFGGK	ref|NC_010546.1|:c4778909-4777557_glutathione_reductase_[Cyanothece_sp._ATCC_51142	si_0003x0.1xAmino_Acids_and_DerivativesxAlanine,_serine,_and_glycinexGlycine_cleavage_system
172039539	AQFQESQGYGWSPVK	ref|NC_010546.1|:c4778909-4777557_glutathione_reductase_[Cyanothece_sp._ATCC_51142	si_0003x0.1xAmino_Acids_and_DerivativesxAlanine,_serine,_and_glycinexGlycine_cleavage_system
172039539	DKILNGFDEDIR	ref|NC_010546.1|:c4778909-4777557_glutathione_reductase_[Cyanothece_sp._ATCC_51142	si_0003x0.1xAmino_Acids_and_DerivativesxAlanine,_serine,_and_glycinexGlycine_cleavage_system
172039539	DKILNGFDEDIRTTIQESMEHHGIQILK	ref|NC_010546.1|:c4778909-4777557_glutathione_reductase_[Cyanothece_sp._ATCC_51142	si_0003x0.1xAmino_Acids_and_DerivativesxAlanine,_serine,_and_glycinexGlycine_cleavage_system
172039539	EAIAVDKYSCTSQENIYAVGDCTDQINLTPVAINEGR	ref|NC_010546.1|:c4778909-4777557_glutathione_reductase_[Cyanothece_sp._ATCC_51142	si_0003x0.1xAmino_Acids_and_DerivativesxAlanine,_serine,_and_glycinexGlycine_cleavage_system
172039539	EQYGEDAIKVYR	ref|NC_010546.1|:c4778909-4777557_glutathione_reductase_[Cyanothece_sp._ATCC_51142	si_0003x0.1xAmino_Acids_and_DerivativesxAlanine,_serine,_and_glycinexGlycine_cleavage_system
172039539	FRPMYYVLPGKDEK	ref|NC_010546.1|:c4778909-4777557_glutathione_reductase_[Cyanothece_sp._ATCC_51142	si_0003x0.1xAmino_Acids_and_DerivativesxAlanine,_serine,_and_glycinexGlycine_cleavage_system
172039539	GLGSDVIQIIR	ref|NC_010546.1|:c4778909-4777557_glutathione_reductase_[Cyanothece_sp._ATCC_51142	si_0003x0.1xAmino_Acids_and_DerivativesxAlanine,_serine,_and_glycinexGlycine_cleavage_system
172039539	GLGSDVIQIIRR	ref|NC_010546.1|:c4778909-4777557_glutathione_reductase_[Cyanothece_sp._ATCC_51142	si_0003x0.1xAmino_Acids_and_DerivativesxAlanine,_serine,_and_glycinexGlycine_cleavage_system
172039539	IAVQGDQNNEMVLADTIGLAATGR	ref|NC_010546.1|:c4778909-4777557_glutathione_reductase_[Cyanothece_sp._ATCC_51142	si_0003x0.1xAmino_Acids_and_DerivativesxAlanine,_serine,_and_glycinexGlycine_cleavage_system
172039539	IAVQGDQNNEMVLADTIGLAATGRKPSLDNLGLENAGVEVK	ref|NC_010546.1|:c4778909-4777557_glutathione_reductase_[Cyanothece_sp._ATCC_51142	si_0003x0.1xAmino_Acids_and_DerivativesxAlanine,_serine,_and_glycinexGlycine_cleavage_system
172039539	IAVQGDQNNEMVLADTIGLAATGRKPSLDNLGLENAGVEVKK	ref|NC_010546.1|:c4778909-4777557_glutathione_reductase_[Cyanothece_sp._ATCC_51142	si_0003x0.1xAmino_Acids_and_DerivativesxAlanine,_serine,_and_glycinexGlycine_cleavage_system
172039539	ILIAVGGHPVRPNIPGIENTIISDDMFTLTEQPK	ref|NC_010546.1|:c4778909-4777557_glutathione_reductase_[Cyanothece_sp._ATCC_51142	si_0003x0.1xAmino_Acids_and_DerivativesxAlanine,_serine,_and_glycinexGlycine_cleavage_system
172039539	ILIAVGGHPVRPNIPGIENTIISDDMFTLTEQPKR	ref|NC_010546.1|:c4778909-4777557_glutathione_reductase_[Cyanothece_sp._ATCC_51142	si_0003x0.1xAmino_Acids_and_DerivativesxAlanine,_serine,_and_glycinexGlycine_cleavage_system
172039539	ILNGFDEDIRTTIQESMEHHGIQILK	ref|NC_010546.1|:c4778909-4777557_glutathione_reductase_[Cyanothece_sp._ATCC_51142	si_0003x0.1xAmino_Acids_and_DerivativesxAlanine,_serine,_and_glycinexGlycine_cleavage_system
172039539	KLMVYTSHFPAQFQESQGYGWSPVK	ref|NC_010546.1|:c4778909-4777557_glutathione_reductase_[Cyanothece_sp._ATCC_51142	si_0003x0.1xAmino_Acids_and_DerivativesxAlanine,_serine,_and_glycinexGlycine_cleavage_system
172039539	KPSLDNLGLENAGVEVK	ref|NC_010546.1|:c4778909-4777557_glutathione_reductase_[Cyanothece_sp._ATCC_51142	si_0003x0.1xAmino_Acids_and_DerivativesxAlanine,_serine,_and_glycinexGlycine_cleavage_system
172039539	KPSLDNLGLENAGVEVKK	ref|NC_010546.1|:c4778909-4777557_glutathione_reductase_[Cyanothece_sp._ATCC_51142	si_0003x0.1xAmino_Acids_and_DerivativesxAlanine,_serine,_and_glycinexGlycine_cleavage_system
172039539	KSDFDATVGIHP	ref|NC_010546.1|:c4778909-4777557_glutathione_reductase_[Cyanothece_sp._ATCC_51142	si_0003x0.1xAmino_Acids_and_DerivativesxAlanine,_serine,_and_glycinexGlycine_cleavage_system
172039539	KSDFDATVGIHPTSAEEFVTMR	ref|NC_010546.1|:c4778909-4777557_glutathione_reductase_[Cyanothece_sp._ATCC_51142	si_0003x0.1xAmino_Acids_and_DerivativesxAlanine,_serine,_and_glycinexGlycine_cleavage_system
172039539	LLDPHTIEVGNTK	ref|NC_010546.1|:c4778909-4777557_glutathione_reductase_[Cyanothece_sp._ATCC_51142	si_0003x0.1xAmino_Acids_and_DerivativesxAlanine,_serine,_and_glycinexGlycine_cleavage_system
172039539	LLDPHTIEVGNTKVTADK	ref|NC_010546.1|:c4778909-4777557_glutathione_reductase_[Cyanothece_sp._ATCC_51142	si_0003x0.1xAmino_Acids_and_DerivativesxAlanine,_serine,_and_glycinexGlycine_cleavage_system
172039539	LVVHQETEK	ref|NC_010546.1|:c4778909-4777557_glutathione_reductase_[Cyanothece_sp._ATCC_51142	si_0003x0.1xAmino_Acids_and_DerivativesxAlanine,_serine,_and_glycinexGlycine_cleavage_system
172039539	LVVHQETEKVLGAHMVGNYAAEIIQGVAIAVK	ref|NC_010546.1|:c4778909-4777557_glutathione_reductase_[Cyanothece_sp._ATCC_51142	si_0003x0.1xAmino_Acids_and_DerivativesxAlanine,_serine,_and_glycinexGlycine_cleavage_system
172039539	MGAKKSDFDATVGIHPTSAEEFVTMR	ref|NC_010546.1|:c4778909-4777557_glutathione_reductase_[Cyanothece_sp._ATCC_51142	si_0003x0.1xAmino_Acids_and_DerivativesxAlanine,_serine,_and_glycinexGlycine_cleavage_system
172039539	MITAVNQETER	ref|NC_010546.1|:c4778909-4777557_glutathione_reductase_[Cyanothece_sp._ATCC_51142	si_0003x0.1xAmino_Acids_and_DerivativesxAlanine,_serine,_and_glycinexGlycine_cleavage_system
172039539	MITAVNQETERLNGIYQR	ref|NC_010546.1|:c4778909-4777557_glutathione_reductase_[Cyanothece_sp._ATCC_51142	si_0003x0.1xAmino_Acids_and_DerivativesxAlanine,_serine,_and_glycinexGlycine_cleavage_system
172039539	MLDKSNVQVYR	ref|NC_010546.1|:c4778909-4777557_glutathione_reductase_[Cyanothece_sp._ATCC_51142	si_0003x0.1xAmino_Acids_and_DerivativesxAlanine,_serine,_and_glycinexGlycine_cleavage_system
172039539	MLDKSNVQVYRDYGK	ref|NC_010546.1|:c4778909-4777557_glutathione_reductase_[Cyanothece_sp._ATCC_51142	si_0003x0.1xAmino_Acids_and_DerivativesxAlanine,_serine,_and_glycinexGlycine_cleavage_system
172039539	MLDKSNVQVYRDYGKLLDPHTIEVGNTK	ref|NC_010546.1|:c4778909-4777557_glutathione_reductase_[Cyanothece_sp._ATCC_51142	si_0003x0.1xAmino_Acids_and_DerivativesxAlanine,_serine,_and_glycinexGlycine_cleavage_system
172039539	SDFDATVGIHPTSAEEFVTMR	ref|NC_010546.1|:c4778909-4777557_glutathione_reductase_[Cyanothece_sp._ATCC_51142	si_0003x0.1xAmino_Acids_and_DerivativesxAlanine,_serine,_and_glycinexGlycine_cleavage_system
172039539	SNVQVYRDYGK	ref|NC_010546.1|:c4778909-4777557_glutathione_reductase_[Cyanothece_sp._ATCC_51142	si_0003x0.1xAmino_Acids_and_DerivativesxAlanine,_serine,_and_glycinexGlycine_cleavage_system
172039539	SYDFDLFVIGGGSGGIATAR	ref|NC_010546.1|:c4778909-4777557_glutathione_reductase_[Cyanothece_sp._ATCC_51142	si_0003x0.1xAmino_Acids_and_DerivativesxAlanine,_serine,_and_glycinexGlycine_cleavage_system
172039539	TMSYENVPSAVFSTPEAATVGLTEAEAKEQYGEDAIK	ref|NC_010546.1|:c4778909-4777557_glutathione_reductase_[Cyanothece_sp._ATCC_51142	si_0003x0.1xAmino_Acids_and_DerivativesxAlanine,_serine,_and_glycinexGlycine_cleavage_system
172039539	TMSYENVPSAVFSTPEAATVGLTEAEAKEQYGEDAIKVYR	ref|NC_010546.1|:c4778909-4777557_glutathione_reductase_[Cyanothece_sp._ATCC_51142	si_0003x0.1xAmino_Acids_and_DerivativesxAlanine,_serine,_and_glycinexGlycine_cleavage_system
172039539	TTIQESMEHHGIQILK	ref|NC_010546.1|:c4778909-4777557_glutathione_reductase_[Cyanothece_sp._ATCC_51142	si_0003x0.1xAmino_Acids_and_DerivativesxAlanine,_serine,_and_glycinexGlycine_cleavage_system
172039539	VGLAEYDR	ref|NC_010546.1|:c4778909-4777557_glutathione_reductase_[Cyanothece_sp._ATCC_51142	si_0003x0.1xAmino_Acids_and_DerivativesxAlanine,_serine,_and_glycinexGlycine_cleavage_system
172039539	VLGAHMVGNYAAEIIQGVAIAVK	ref|NC_010546.1|:c4778909-4777557_glutathione_reductase_[Cyanothece_sp._ATCC_51142	si_0003x0.1xAmino_Acids_and_DerivativesxAlanine,_serine,_and_glycinexGlycine_cleavage_system
172039539	VTADKILIAVGGHPVRPNIPGIENTIISDDMFTLTEQPK	ref|NC_010546.1|:c4778909-4777557_glutathione_reductase_[Cyanothece_sp._ATCC_51142	si_0003x0.1xAmino_Acids_and_DerivativesxAlanine,_serine,_and_glycinexGlycine_cleavage_system
172039539	VTADKILIAVGGHPVRPNIPGIENTIISDDMFTLTEQPKR	ref|NC_010546.1|:c4778909-4777557_glutathione_reductase_[Cyanothece_sp._ATCC_51142	si_0003x0.1xAmino_Acids_and_DerivativesxAlanine,_serine,_and_glycinexGlycine_cleavage_system
172039537	ELKEETGLELLK	ref|NC_010546.1|:4772728-4773183_NUDIX_hydrolase_[Cyanothece_sp._ATCC_51142	si_0373x0.3xCofactors,_Vitamins,_Prosthetic_Groups,_PigmentsxNAD_and_NADPxNAD_and_NADP_cofactor_biosynthesis_global
172039537	HPITGATIIPVLPDGSIVLIQR	ref|NC_010546.1|:4772728-4773183_NUDIX_hydrolase_[Cyanothece_sp._ATCC_51142	si_0373x0.3xCofactors,_Vitamins,_Prosthetic_Groups,_PigmentsxNAD_and_NADPxNAD_and_NADP_cofactor_biosynthesis_global
172039537	KDTGQWGLPGGIVDWGEDIITTAK	ref|NC_010546.1|:4772728-4773183_NUDIX_hydrolase_[Cyanothece_sp._ATCC_51142	si_0373x0.3xCofactors,_Vitamins,_Prosthetic_Groups,_PigmentsxNAD_and_NADPxNAD_and_NADP_cofactor_biosynthesis_global
172039537	LVGVYSSIDRDPR	ref|NC_010546.1|:4772728-4773183_NUDIX_hydrolase_[Cyanothece_sp._ATCC_51142	si_0373x0.3xCofactors,_Vitamins,_Prosthetic_Groups,_PigmentsxNAD_and_NADPxNAD_and_NADP_cofactor_biosynthesis_global
172039532	EALGEQYGQEER	ref|NC_010546.1|:4767010-4767222_hypothetical_protein_cce_4619_[Cyanothece_sp._ATCC_51142	si_0962x1xNo_Function_MatchxNo_Function_MatchxNone
172039530	ALGISEDLDPSPSAPR	ref|NC_010546.1|:c4766516-4766097_hypothetical_protein_cce_4617_[Cyanothece_sp._ATCC_51142	si_0962x1xNo_Function_MatchxNo_Function_MatchxNone
172039530	IVDFEADKSK	ref|NC_010546.1|:c4766516-4766097_hypothetical_protein_cce_4617_[Cyanothece_sp._ATCC_51142	si_0962x1xNo_Function_MatchxNo_Function_MatchxNone
172039530	IVDFEADKSKLR	ref|NC_010546.1|:c4766516-4766097_hypothetical_protein_cce_4617_[Cyanothece_sp._ATCC_51142	si_0962x1xNo_Function_MatchxNo_Function_MatchxNone
172039530	SQANTNLSVDEALR	ref|NC_010546.1|:c4766516-4766097_hypothetical_protein_cce_4617_[Cyanothece_sp._ATCC_51142	si_0962x1xNo_Function_MatchxNo_Function_MatchxNone
172039529	QILQEGDIINIDVTPILDGYHGDTSR	ref|NC_010546.1|:c4766001-4765240_methionine_aminopeptidase_[Cyanothece_sp._ATCC_51142	si_0304x0.5xClustering-based_subsystemsxUnclassified_clustering-based_subsystemsxCBSS-312309.3.peg.1965
172039529	TFFVGNPSPLAK	ref|NC_010546.1|:c4766001-4765240_methionine_aminopeptidase_[Cyanothece_sp._ATCC_51142	si_0304x0.5xClustering-based_subsystemsxUnclassified_clustering-based_subsystemsxCBSS-312309.3.peg.1965
172039528	GAQMLGLLILPEVISR	ref|NC_010546.1|:c4764959-4763688_dolichyl-phosphate-mannose_synthase_[Cyanothece_sp._ATCC_51142	si_0189x1xCell_Wall_and_CapsulexGram-Negative_cell_wall_componentsxLipid_A-Ara4N_pathway_(_Polymyxin_resistance_)
172039528	ILAVIDADLQHPPEVLTQLLEEIEK	ref|NC_010546.1|:c4764959-4763688_dolichyl-phosphate-mannose_synthase_[Cyanothece_sp._ATCC_51142	si_0189x1xCell_Wall_and_CapsulexGram-Negative_cell_wall_componentsxLipid_A-Ara4N_pathway_(_Polymyxin_resistance_)
172039528	LALELTPQYPQLR	ref|NC_010546.1|:c4764959-4763688_dolichyl-phosphate-mannose_synthase_[Cyanothece_sp._ATCC_51142	si_0189x1xCell_Wall_and_CapsulexGram-Negative_cell_wall_componentsxLipid_A-Ara4N_pathway_(_Polymyxin_resistance_)
172039528	LSDPMSGYFMVR	ref|NC_010546.1|:c4764959-4763688_dolichyl-phosphate-mannose_synthase_[Cyanothece_sp._ATCC_51142	si_0189x1xCell_Wall_and_CapsulexGram-Negative_cell_wall_componentsxLipid_A-Ara4N_pathway_(_Polymyxin_resistance_)
172039528	TQSLVPVPSGVFQILETPITSDLPLDSPLK	ref|NC_010546.1|:c4764959-4763688_dolichyl-phosphate-mannose_synthase_[Cyanothece_sp._ATCC_51142	si_0189x1xCell_Wall_and_CapsulexGram-Negative_cell_wall_componentsxLipid_A-Ara4N_pathway_(_Polymyxin_resistance_)
172039528	WIGEAGYVFR	ref|NC_010546.1|:c4764959-4763688_dolichyl-phosphate-mannose_synthase_[Cyanothece_sp._ATCC_51142	si_0189x1xCell_Wall_and_CapsulexGram-Negative_cell_wall_componentsxLipid_A-Ara4N_pathway_(_Polymyxin_resistance_)
172039526	EGYSDIFLYQPSENLK	ref|NC_010546.1|:c4762620-4761073_hypothetical_protein_cce_4613_[Cyanothece_sp._ATCC_51142
172039526	EIGIEELQQYQNPQK	ref|NC_010546.1|:c4762620-4761073_hypothetical_protein_cce_4613_[Cyanothece_sp._ATCC_51142
172039526	FQLVVEPDIPSIK	ref|NC_010546.1|:c4762620-4761073_hypothetical_protein_cce_4613_[Cyanothece_sp._ATCC_51142
172039526	TQLSEDYQLEAVR	ref|NC_010546.1|:c4762620-4761073_hypothetical_protein_cce_4613_[Cyanothece_sp._ATCC_51142
172039526	TQLSEDYQLEAVRKPLLWK	ref|NC_010546.1|:c4762620-4761073_hypothetical_protein_cce_4613_[Cyanothece_sp._ATCC_51142
172039526	TVVDTVKR	ref|NC_010546.1|:c4762620-4761073_hypothetical_protein_cce_4613_[Cyanothece_sp._ATCC_51142
172039526	VKFQLVVEPDIPSIK	ref|NC_010546.1|:c4762620-4761073_hypothetical_protein_cce_4613_[Cyanothece_sp._ATCC_51142
172039525	FAQIQDFQK	ref|NC_010546.1|:4760811-4761062_hypothetical_protein_cce_4612_[Cyanothece_sp._ATCC_51142	si_0962x1xNo_Function_MatchxNo_Function_MatchxNone
172039525	IRVEPVFFGSVERA	ref|NC_010546.1|:4760811-4761062_hypothetical_protein_cce_4612_[Cyanothece_sp._ATCC_51142	si_0962x1xNo_Function_MatchxNo_Function_MatchxNone
172039525	NIQGEYMVVRPSSIMAIR	ref|NC_010546.1|:4760811-4761062_hypothetical_protein_cce_4612_[Cyanothece_sp._ATCC_51142	si_0962x1xNo_Function_MatchxNo_Function_MatchxNone
172039525	VEPVFFGSVERA	ref|NC_010546.1|:4760811-4761062_hypothetical_protein_cce_4612_[Cyanothece_sp._ATCC_51142	si_0962x1xNo_Function_MatchxNo_Function_MatchxNone
172039525	WYSGEIVPNFDSEQFINVPIK	ref|NC_010546.1|:4760811-4761062_hypothetical_protein_cce_4612_[Cyanothece_sp._ATCC_51142	si_0962x1xNo_Function_MatchxNo_Function_MatchxNone
172039525	WYSGEIVPNFDSEQFINVPIKNIQGEYMV	ref|NC_010546.1|:4760811-4761062_hypothetical_protein_cce_4612_[Cyanothece_sp._ATCC_51142	si_0962x1xNo_Function_MatchxNo_Function_MatchxNone
172039524	KSLLLVVDGTPVTQIKQEETSR	ref|NC_010546.1|:4759980-4760765_hypothetical_protein_cce_4611_[Cyanothece_sp._ATCC_51142	si_0962x1xNo_Function_MatchxNo_Function_MatchxNone
172039524	QDITATLEPIIFFSQQTEYPHSSK	ref|NC_010546.1|:4759980-4760765_hypothetical_protein_cce_4611_[Cyanothece_sp._ATCC_51142	si_0962x1xNo_Function_MatchxNo_Function_MatchxNone
172039524	TSEELSQTLPQVIEALLQR	ref|NC_010546.1|:4759980-4760765_hypothetical_protein_cce_4611_[Cyanothece_sp._ATCC_51142	si_0962x1xNo_Function_MatchxNo_Function_MatchxNone
172039521	KIQATDLLAR	ref|NC_010546.1|:4757895-4758458_peptide_deformylase_[Cyanothece_sp._ATCC_51142	si_0280x0.3xClustering-based_subsystemsxUnclassified_clustering-based_subsystemsxBacterial_RNA-metabolizing_Zn-dependent_hydrolases
172039519	ALANPIGIEAAEVLEQWDR	ref|NC_010546.1|:4754566-4756647_putative_7-beta-(4-carbaxybutanamido)cephalosporanic_acid_acylase_[Cyanothece_sp._ATCC_51142	si_0962x1xNo_Function_MatchxNo_Function_MatchxNone
172039519	LQEENYLFNGQLIPLKQEIETIK	ref|NC_010546.1|:4754566-4756647_putative_7-beta-(4-carbaxybutanamido)cephalosporanic_acid_acylase_[Cyanothece_sp._ATCC_51142	si_0962x1xNo_Function_MatchxNo_Function_MatchxNone
172039519	QVLPVTGTDILGHFQR	ref|NC_010546.1|:4754566-4756647_putative_7-beta-(4-carbaxybutanamido)cephalosporanic_acid_acylase_[Cyanothece_sp._ATCC_51142	si_0962x1xNo_Function_MatchxNo_Function_MatchxNone
172039519	TYLDSFAQGINDYVQQHPDEIQEDLKQVLPVTGTDILGHFQR	ref|NC_010546.1|:4754566-4756647_putative_7-beta-(4-carbaxybutanamido)cephalosporanic_acid_acylase_[Cyanothece_sp._ATCC_51142	si_0962x1xNo_Function_MatchxNo_Function_MatchxNone
172039519	VGEQDVAAR	ref|NC_010546.1|:4754566-4756647_putative_7-beta-(4-carbaxybutanamido)cephalosporanic_acid_acylase_[Cyanothece_sp._ATCC_51142	si_0962x1xNo_Function_MatchxNo_Function_MatchxNone
172039514	DAGISSQDHSIDPAK	ref|NC_010546.1|:c4749808-4748420_hypothetical_protein_cce_4601_[Cyanothece_sp._ATCC_51142	si_0962x1xNo_Function_MatchxNo_Function_MatchxNone
172039514	ELPNLPDQTFQER	ref|NC_010546.1|:c4749808-4748420_hypothetical_protein_cce_4601_[Cyanothece_sp._ATCC_51142	si_0962x1xNo_Function_MatchxNo_Function_MatchxNone
172039514	FADTVLLLWDFVAK	ref|NC_010546.1|:c4749808-4748420_hypothetical_protein_cce_4601_[Cyanothece_sp._ATCC_51142	si_0962x1xNo_Function_MatchxNo_Function_MatchxNone
172039514	LLNIGLEVAETYFDLKPK	ref|NC_010546.1|:c4749808-4748420_hypothetical_protein_cce_4601_[Cyanothece_sp._ATCC_51142	si_0962x1xNo_Function_MatchxNo_Function_MatchxNone
172039514	LYQLGEHFLGVMENFYR	ref|NC_010546.1|:c4749808-4748420_hypothetical_protein_cce_4601_[Cyanothece_sp._ATCC_51142	si_0962x1xNo_Function_MatchxNo_Function_MatchxNone
172039514	NVAQLANLYQQFQDGK	ref|NC_010546.1|:c4749808-4748420_hypothetical_protein_cce_4601_[Cyanothece_sp._ATCC_51142	si_0962x1xNo_Function_MatchxNo_Function_MatchxNone
172039514	TLLPLWLQWQTNIQDIEGK	ref|NC_010546.1|:c4749808-4748420_hypothetical_protein_cce_4601_[Cyanothece_sp._ATCC_51142	si_0962x1xNo_Function_MatchxNo_Function_MatchxNone
172039514	VFITVGEPLSVSDRFDAYK	ref|NC_010546.1|:c4749808-4748420_hypothetical_protein_cce_4601_[Cyanothece_sp._ATCC_51142	si_0962x1xNo_Function_MatchxNo_Function_MatchxNone
172039512	DANSYAQSNR	ref|NC_010546.1|:4746391-4747317_putative_cytochrome_oxidase_assembly_[Cyanothece_sp._ATCC_51142	si_0276x0.5xClustering-based_subsystemsxTricarboxylate_transporterxCBSS-49338.1.peg.459
172039509	SAIQALGEITGEEITESVLDKIFSR	ref|NC_010546.1|:c4745501-4744119_tRNA_modification_GTPase_TrmE_[Cyanothece_sp._ATCC_51142	si_0012x0.1xAmino_Acids_and_DerivativesxArginine;_urea_cycle,_polyaminesxUrea_decomposition
172039509	SILEQFESILNTAEQGELLR	ref|NC_010546.1|:c4745501-4744119_tRNA_modification_GTPase_TrmE_[Cyanothece_sp._ATCC_51142	si_0012x0.1xAmino_Acids_and_DerivativesxArginine;_urea_cycle,_polyaminesxUrea_decomposition
172039509	SQQASQMALAGLQGK	ref|NC_010546.1|:c4745501-4744119_tRNA_modification_GTPase_TrmE_[Cyanothece_sp._ATCC_51142	si_0012x0.1xAmino_Acids_and_DerivativesxArginine;_urea_cycle,_polyaminesxUrea_decomposition
172039509	TSAANHQGIEALEAAILK	ref|NC_010546.1|:c4745501-4744119_tRNA_modification_GTPase_TrmE_[Cyanothece_sp._ATCC_51142	si_0012x0.1xAmino_Acids_and_DerivativesxArginine;_urea_cycle,_polyaminesxUrea_decomposition
172039508	EGFEWIEANDAPR	ref|NC_010546.1|:4741916-4743871_1,4-alpha-glucan_branching_enzyme_[Cyanothece_sp._ATCC_51142	si_0089x0.3xCarbohydratesxDi-_and_oligosaccharidesxTrehalose_Biosynthesis
172039508	LLGEFDYYLFGQGDHHR	ref|NC_010546.1|:4741916-4743871_1,4-alpha-glucan_branching_enzyme_[Cyanothece_sp._ATCC_51142	si_0089x0.3xCarbohydratesxDi-_and_oligosaccharidesxTrehalose_Biosynthesis
172039508	MPGDEWQK	ref|NC_010546.1|:4741916-4743871_1,4-alpha-glucan_branching_enzyme_[Cyanothece_sp._ATCC_51142	si_0089x0.3xCarbohydratesxDi-_and_oligosaccharidesxTrehalose_Biosynthesis
172039508	MYVREPALYMEDFSR	ref|NC_010546.1|:4741916-4743871_1,4-alpha-glucan_branching_enzyme_[Cyanothece_sp._ATCC_51142	si_0089x0.3xCarbohydratesxDi-_and_oligosaccharidesxTrehalose_Biosynthesis
172039508	MYVREPALYMEDFSREGFEWIEANDAPR	ref|NC_010546.1|:4741916-4743871_1,4-alpha-glucan_branching_enzyme_[Cyanothece_sp._ATCC_51142	si_0089x0.3xCarbohydratesxDi-_and_oligosaccharidesxTrehalose_Biosynthesis
172039508	TEVGIWELFIPGMK	ref|NC_010546.1|:4741916-4743871_1,4-alpha-glucan_branching_enzyme_[Cyanothece_sp._ATCC_51142	si_0089x0.3xCarbohydratesxDi-_and_oligosaccharidesxTrehalose_Biosynthesis
172039508	TNPEKQPMSVYEVHLGSWLHDSIDNPPKEGPSLPVEQKPGAR	ref|NC_010546.1|:4741916-4743871_1,4-alpha-glucan_branching_enzyme_[Cyanothece_sp._ATCC_51142	si_0089x0.3xCarbohydratesxDi-_and_oligosaccharidesxTrehalose_Biosynthesis
172039508	WNMGWMNDTLK	ref|NC_010546.1|:4741916-4743871_1,4-alpha-glucan_branching_enzyme_[Cyanothece_sp._ATCC_51142	si_0089x0.3xCarbohydratesxDi-_and_oligosaccharidesxTrehalose_Biosynthesis
172039508	YLNYRELAEK	ref|NC_010546.1|:4741916-4743871_1,4-alpha-glucan_branching_enzyme_[Cyanothece_sp._ATCC_51142	si_0089x0.3xCarbohydratesxDi-_and_oligosaccharidesxTrehalose_Biosynthesis
172039503	AVIITDSSHVVLSAIQPETVAHR	ref|NC_010546.1|:4738519-4738791_hypothetical_protein_cce_4590_[Cyanothece_sp._ATCC_51142	si_0316x1xClustering-based_subsystemsxUnclassified_clustering-based_subsystemsxCBSS-323097.3.peg.2594
172039503	AVIITDSSHVVLSAIQPETVAHRFVVNKETATINSN	ref|NC_010546.1|:4738519-4738791_hypothetical_protein_cce_4590_[Cyanothece_sp._ATCC_51142	si_0316x1xClustering-based_subsystemsxUnclassified_clustering-based_subsystemsxCBSS-323097.3.peg.2594
172039503	ERGQLIDATYGR	ref|NC_010546.1|:4738519-4738791_hypothetical_protein_cce_4590_[Cyanothece_sp._ATCC_51142	si_0316x1xClustering-based_subsystemsxUnclassified_clustering-based_subsystemsxCBSS-323097.3.peg.2594
172039503	ERGQLIDATYGRR	ref|NC_010546.1|:4738519-4738791_hypothetical_protein_cce_4590_[Cyanothece_sp._ATCC_51142	si_0316x1xClustering-based_subsystemsxUnclassified_clustering-based_subsystemsxCBSS-323097.3.peg.2594
172039503	FVVNKETATINSN	ref|NC_010546.1|:4738519-4738791_hypothetical_protein_cce_4590_[Cyanothece_sp._ATCC_51142	si_0316x1xClustering-based_subsystemsxUnclassified_clustering-based_subsystemsxCBSS-323097.3.peg.2594
172039503	GQLIDATYGR	ref|NC_010546.1|:4738519-4738791_hypothetical_protein_cce_4590_[Cyanothece_sp._ATCC_51142	si_0316x1xClustering-based_subsystemsxUnclassified_clustering-based_subsystemsxCBSS-323097.3.peg.2594
172039503	GQLIDATYGRR	ref|NC_010546.1|:4738519-4738791_hypothetical_protein_cce_4590_[Cyanothece_sp._ATCC_51142	si_0316x1xClustering-based_subsystemsxUnclassified_clustering-based_subsystemsxCBSS-323097.3.peg.2594
172039503	MENIQLINIGFGNIVSANR	ref|NC_010546.1|:4738519-4738791_hypothetical_protein_cce_4590_[Cyanothece_sp._ATCC_51142	si_0316x1xClustering-based_subsystemsxUnclassified_clustering-based_subsystemsxCBSS-323097.3.peg.2594
172039503	TRAVIITDSSHVVLSAIQPETVAHR	ref|NC_010546.1|:4738519-4738791_hypothetical_protein_cce_4590_[Cyanothece_sp._ATCC_51142	si_0316x1xClustering-based_subsystemsxUnclassified_clustering-based_subsystemsxCBSS-323097.3.peg.2594
172039503	VIAIVSPESAPIK	ref|NC_010546.1|:4738519-4738791_hypothetical_protein_cce_4590_[Cyanothece_sp._ATCC_51142	si_0316x1xClustering-based_subsystemsxUnclassified_clustering-based_subsystemsxCBSS-323097.3.peg.2594
172039503	VIAIVSPESAPIKR	ref|NC_010546.1|:4738519-4738791_hypothetical_protein_cce_4590_[Cyanothece_sp._ATCC_51142	si_0316x1xClustering-based_subsystemsxUnclassified_clustering-based_subsystemsxCBSS-323097.3.peg.2594
172039502	EQTLAQFSPDALSQK	ref|NC_010546.1|:4737224-4738348_glycosyl_transferase,_group_1_[Cyanothece_sp._ATCC_51142	si_0169x0.3xCell_Wall_and_CapsulexCapsular_and_extracellular_polysacchridesxExopolysaccharide_Biosynthesis
172039502	NADAIWTISHYSR	ref|NC_010546.1|:4737224-4738348_glycosyl_transferase,_group_1_[Cyanothece_sp._ATCC_51142	si_0169x0.3xCell_Wall_and_CapsulexCapsular_and_extracellular_polysacchridesxExopolysaccharide_Biosynthesis
172039502	VVFAGFVPTEDLVNHYR	ref|NC_010546.1|:4737224-4738348_glycosyl_transferase,_group_1_[Cyanothece_sp._ATCC_51142	si_0169x0.3xCell_Wall_and_CapsulexCapsular_and_extracellular_polysacchridesxExopolysaccharide_Biosynthesis
172039499	LDSIQAAILQVK	ref|NC_010546.1|:c4736329-4735184_DegT/DnrJ/EryC1/StrS_aminotransferase_family_protein_[Cyanothece_sp._ATCC_51142	si_0032x0.2xAmino_Acids_and_DerivativesxGlutamine,_glutamate,_aspartate,_asparagine;_ammonia_assimilationxGlutamine,_Glutamate,_Aspartate_and_Asparagine_Biosynthesis
172039499	VYQNLGYQR	ref|NC_010546.1|:c4736329-4735184_DegT/DnrJ/EryC1/StrS_aminotransferase_family_protein_[Cyanothece_sp._ATCC_51142	si_0032x0.2xAmino_Acids_and_DerivativesxGlutamine,_glutamate,_aspartate,_asparagine;_ammonia_assimilationxGlutamine,_Glutamate,_Aspartate_and_Asparagine_Biosynthesis
172039495	EHAPQAIIR	ref|NC_010546.1|:c4730167-4729544_isopropylmalate_isomerase_small_subunit_[Cyanothece_sp._ATCC_51142	si_0023x0.5xAmino_Acids_and_DerivativesxBranched-chain_amino_acidsxBranched-Chain_Amino_Acid_Biosynthesis
172039495	GIPLVGDDIDTDR	ref|NC_010546.1|:c4730167-4729544_isopropylmalate_isomerase_small_subunit_[Cyanothece_sp._ATCC_51142	si_0023x0.5xAmino_Acids_and_DerivativesxBranched-chain_amino_acidsxBranched-Chain_Amino_Acid_Biosynthesis
172039495	GIPLVGDDIDTDRIIPAR	ref|NC_010546.1|:c4730167-4729544_isopropylmalate_isomerase_small_subunit_[Cyanothece_sp._ATCC_51142	si_0023x0.5xAmino_Acids_and_DerivativesxBranched-chain_amino_acidsxBranched-Chain_Amino_Acid_Biosynthesis
172039495	LQNNPQAQITLDLAAK	ref|NC_010546.1|:c4730167-4729544_isopropylmalate_isomerase_small_subunit_[Cyanothece_sp._ATCC_51142	si_0023x0.5xAmino_Acids_and_DerivativesxBranched-chain_amino_acidsxBranched-Chain_Amino_Acid_Biosynthesis
172039493	WQVGPVEIR	ref|NC_010546.1|:c4728375-4728004_hypothetical_protein_cce_4580_[Cyanothece_sp._ATCC_51142	si_0962x1xNo_Function_MatchxNo_Function_MatchxNone
172039491	LGGEEFVVILPHTNLK	ref|NC_010546.1|:c4724299-4723292_two-component_response_regulator_[Cyanothece_sp._ATCC_51142	si_0224x0.1xClustering-based_subsystemsxChemotaxis,_response_regulatorsxCBSS-323850.3.peg.3142
172039491	MKNLDPFKPEDFLILVVDDIRK	ref|NC_010546.1|:c4724299-4723292_two-component_response_regulator_[Cyanothece_sp._ATCC_51142	si_0224x0.1xClustering-based_subsystemsxChemotaxis,_response_regulatorsxCBSS-323850.3.peg.3142
172039491	NLDPFKPEDFLILVVDDIRK	ref|NC_010546.1|:c4724299-4723292_two-component_response_regulator_[Cyanothece_sp._ATCC_51142	si_0224x0.1xClustering-based_subsystemsxChemotaxis,_response_regulatorsxCBSS-323850.3.peg.3142
172039491	SIFSLGKQEFER	ref|NC_010546.1|:c4724299-4723292_two-component_response_regulator_[Cyanothece_sp._ATCC_51142	si_0224x0.1xClustering-based_subsystemsxChemotaxis,_response_regulatorsxCBSS-323850.3.peg.3142
172039491	VAIMHNEQLK	ref|NC_010546.1|:c4724299-4723292_two-component_response_regulator_[Cyanothece_sp._ATCC_51142	si_0224x0.1xClustering-based_subsystemsxChemotaxis,_response_regulatorsxCBSS-323850.3.peg.3142
172039490	AVDHLSQGK	ref|NC_010546.1|:c4723268-4722486_glutamine-binding_protein_of_glutamine_ABC_transporter_[Cyanothece_sp._ATCC_51142	si_0962x1xNo_Function_MatchxNo_Function_MatchxNone
172039489	AEEYYELASLFLDKK	ref|NC_010546.1|:c4722358-4721819_photosystem_I_assembly_protein_[Cyanothece_sp._ATCC_51142	si_0643x1xPhotosynthesisxElectron_transport_and_photophosphorylationxPhotosystem_I
172039489	AIETYEETLK	ref|NC_010546.1|:c4722358-4721819_photosystem_I_assembly_protein_[Cyanothece_sp._ATCC_51142	si_0643x1xPhotosynthesisxElectron_transport_and_photophosphorylationxPhotosystem_I
172039489	AIETYEETLKIDENNK	ref|NC_010546.1|:c4722358-4721819_photosystem_I_assembly_protein_[Cyanothece_sp._ATCC_51142	si_0643x1xPhotosynthesisxElectron_transport_and_photophosphorylationxPhotosystem_I
172039489	AIETYEETLKIDENNKVAKR	ref|NC_010546.1|:c4722358-4721819_photosystem_I_assembly_protein_[Cyanothece_sp._ATCC_51142	si_0643x1xPhotosynthesisxElectron_transport_and_photophosphorylationxPhotosystem_I
172039489	GKAEEYYELASLFLDK	ref|NC_010546.1|:c4722358-4721819_photosystem_I_assembly_protein_[Cyanothece_sp._ATCC_51142	si_0643x1xPhotosynthesisxElectron_transport_and_photophosphorylationxPhotosystem_I
172039489	GKAEEYYELASLFLDKK	ref|NC_010546.1|:c4722358-4721819_photosystem_I_assembly_protein_[Cyanothece_sp._ATCC_51142	si_0643x1xPhotosynthesisxElectron_transport_and_photophosphorylationxPhotosystem_I
172039489	LYPEYAIALNNLANAYEK	ref|NC_010546.1|:c4722358-4721819_photosystem_I_assembly_protein_[Cyanothece_sp._ATCC_51142	si_0643x1xPhotosynthesisxElectron_transport_and_photophosphorylationxPhotosystem_I
172039489	LYVQAVNLLQK	ref|NC_010546.1|:c4722358-4721819_photosystem_I_assembly_protein_[Cyanothece_sp._ATCC_51142	si_0643x1xPhotosynthesisxElectron_transport_and_photophosphorylationxPhotosystem_I
172039489	TGENIEAENK	ref|NC_010546.1|:c4722358-4721819_photosystem_I_assembly_protein_[Cyanothece_sp._ATCC_51142	si_0643x1xPhotosynthesisxElectron_transport_and_photophosphorylationxPhotosystem_I
172039487	EPVYNYSGDFPFLWDEIKVPVK	ref|NC_010546.1|:4719467-4720375_hypothetical_protein_cce_4574_[Cyanothece_sp._ATCC_51142	si_0962x1xNo_Function_MatchxNo_Function_MatchxNone
172039487	IANSFVFKEPVYNYSGDFPFLWDEIKVPVK	ref|NC_010546.1|:4719467-4720375_hypothetical_protein_cce_4574_[Cyanothece_sp._ATCC_51142	si_0962x1xNo_Function_MatchxNo_Function_MatchxNone
172039487	ILEEIDKTEGK	ref|NC_010546.1|:4719467-4720375_hypothetical_protein_cce_4574_[Cyanothece_sp._ATCC_51142	si_0962x1xNo_Function_MatchxNo_Function_MatchxNone
172039487	QLLDNVVHEVVGDYVHFAQEK	ref|NC_010546.1|:4719467-4720375_hypothetical_protein_cce_4574_[Cyanothece_sp._ATCC_51142	si_0962x1xNo_Function_MatchxNo_Function_MatchxNone
172039484	AGNSLGLDVEINNLDNPRVELEEHYFNAK	ref|NC_010546.1|:4717799-4718953_sulfolipid_biosynthesis_protein_[Cyanothece_sp._ATCC_51142	si_0303x1xClustering-based_subsystemsxUnclassified_clustering-based_subsystemsxCBSS-296591.1.peg.2330
172039484	ATDLNQGVVYGVLTEETGMDEMLINRLDYDGVFGTALNR	ref|NC_010546.1|:4717799-4718953_sulfolipid_biosynthesis_protein_[Cyanothece_sp._ATCC_51142	si_0303x1xClustering-based_subsystemsxUnclassified_clustering-based_subsystemsxCBSS-296591.1.peg.2330
172039484	DTLPYPKQPGSFYHLSK	ref|NC_010546.1|:4717799-4718953_sulfolipid_biosynthesis_protein_[Cyanothece_sp._ATCC_51142	si_0303x1xClustering-based_subsystemsxUnclassified_clustering-based_subsystemsxCBSS-296591.1.peg.2330
172039484	HYLSDSLLDSLLNFAEK	ref|NC_010546.1|:4717799-4718953_sulfolipid_biosynthesis_protein_[Cyanothece_sp._ATCC_51142	si_0303x1xClustering-based_subsystemsxUnclassified_clustering-based_subsystemsxCBSS-296591.1.peg.2330
172039484	IQRWQELTGK	ref|NC_010546.1|:4717799-4718953_sulfolipid_biosynthesis_protein_[Cyanothece_sp._ATCC_51142	si_0303x1xClustering-based_subsystemsxUnclassified_clustering-based_subsystemsxCBSS-296591.1.peg.2330
172039484	KAGNSLGLDVEINNLDNPRVELEEHYFNAK	ref|NC_010546.1|:4717799-4718953_sulfolipid_biosynthesis_protein_[Cyanothece_sp._ATCC_51142	si_0303x1xClustering-based_subsystemsxUnclassified_clustering-based_subsystemsxCBSS-296591.1.peg.2330
172039484	LGTMGEYGTPNIDIEEGYITIEHNGR	ref|NC_010546.1|:4717799-4718953_sulfolipid_biosynthesis_protein_[Cyanothece_sp._ATCC_51142	si_0303x1xClustering-based_subsystemsxUnclassified_clustering-based_subsystemsxCBSS-296591.1.peg.2330
172039484	LGTMGEYGTPNIDIEEGYITIEHNGRKDTLPYPK	ref|NC_010546.1|:4717799-4718953_sulfolipid_biosynthesis_protein_[Cyanothece_sp._ATCC_51142	si_0303x1xClustering-based_subsystemsxUnclassified_clustering-based_subsystemsxCBSS-296591.1.peg.2330
172039484	LGVDTLTPIAPIQK	ref|NC_010546.1|:4717799-4718953_sulfolipid_biosynthesis_protein_[Cyanothece_sp._ATCC_51142	si_0303x1xClustering-based_subsystemsxUnclassified_clustering-based_subsystemsxCBSS-296591.1.peg.2330
172039484	LGVDTLTPIAPIQKR	ref|NC_010546.1|:4717799-4718953_sulfolipid_biosynthesis_protein_[Cyanothece_sp._ATCC_51142	si_0303x1xClustering-based_subsystemsxUnclassified_clustering-based_subsystemsxCBSS-296591.1.peg.2330
172039484	LLDLGLQPHYLSDSLLDSLLNFAEK	ref|NC_010546.1|:4717799-4718953_sulfolipid_biosynthesis_protein_[Cyanothece_sp._ATCC_51142	si_0303x1xClustering-based_subsystemsxUnclassified_clustering-based_subsystemsxCBSS-296591.1.peg.2330
172039484	LLDLGLQPHYLSDSLLDSLLNFAEKYK	ref|NC_010546.1|:4717799-4718953_sulfolipid_biosynthesis_protein_[Cyanothece_sp._ATCC_51142	si_0303x1xClustering-based_subsystemsxUnclassified_clustering-based_subsystemsxCBSS-296591.1.peg.2330
172039484	SAPYSMIDREHAVFTQVNNVVGTLNILYAMKEDFPDAHLVK	ref|NC_010546.1|:4717799-4718953_sulfolipid_biosynthesis_protein_[Cyanothece_sp._ATCC_51142	si_0303x1xClustering-based_subsystemsxUnclassified_clustering-based_subsystemsxCBSS-296591.1.peg.2330
172039484	TIDLFVGDITDYSFLSQALQQFEPGAIVHFGEQR	ref|NC_010546.1|:4717799-4718953_sulfolipid_biosynthesis_protein_[Cyanothece_sp._ATCC_51142	si_0303x1xClustering-based_subsystemsxUnclassified_clustering-based_subsystemsxCBSS-296591.1.peg.2330
172039484	VFNQFTELFSISDLAMMVK	ref|NC_010546.1|:4717799-4718953_sulfolipid_biosynthesis_protein_[Cyanothece_sp._ATCC_51142	si_0303x1xClustering-based_subsystemsxUnclassified_clustering-based_subsystemsxCBSS-296591.1.peg.2330
172039484	YWDSKLGVDTLTPIAPIQKR	ref|NC_010546.1|:4717799-4718953_sulfolipid_biosynthesis_protein_[Cyanothece_sp._ATCC_51142	si_0303x1xClustering-based_subsystemsxUnclassified_clustering-based_subsystemsxCBSS-296591.1.peg.2330
172039472	AVLARPIYSK	ref|NC_010546.1|:4703581-4704588_hypothetical_protein_cce_4559_[Cyanothece_sp._ATCC_51142
172039472	AVVIDPDIFAVADIYELLTK	ref|NC_010546.1|:4703581-4704588_hypothetical_protein_cce_4559_[Cyanothece_sp._ATCC_51142
172039472	EALLEGIISEDFIK	ref|NC_010546.1|:4703581-4704588_hypothetical_protein_cce_4559_[Cyanothece_sp._ATCC_51142
172039472	EIDEVFNK	ref|NC_010546.1|:4703581-4704588_hypothetical_protein_cce_4559_[Cyanothece_sp._ATCC_51142
172039472	ENIGELEEEWNHYDILNEHTK	ref|NC_010546.1|:4703581-4704588_hypothetical_protein_cce_4559_[Cyanothece_sp._ATCC_51142
172039472	LNNNVQGFAR	ref|NC_010546.1|:4703581-4704588_hypothetical_protein_cce_4559_[Cyanothece_sp._ATCC_51142
172039472	QHPDPNQENLFFSYLK	ref|NC_010546.1|:4703581-4704588_hypothetical_protein_cce_4559_[Cyanothece_sp._ATCC_51142
172039472	TGLLYDTSR	ref|NC_010546.1|:4703581-4704588_hypothetical_protein_cce_4559_[Cyanothece_sp._ATCC_51142
172039472	VNYSTENVLQR	ref|NC_010546.1|:4703581-4704588_hypothetical_protein_cce_4559_[Cyanothece_sp._ATCC_51142
172039471	DILIALLTTGEPIIVVTK	ref|NC_010546.1|:4702321-4703523_glycosyl_transferase,_group_1_[Cyanothece_sp._ATCC_51142	si_0202x1xCell_Wall_and_CapsulexGram-Positive_cell_wall_componentsxTeichoic_and_lipoteichoic_acids_biosynthesis
172039471	DPQTLVEAFKK	ref|NC_010546.1|:4702321-4703523_glycosyl_transferase,_group_1_[Cyanothece_sp._ATCC_51142	si_0202x1xCell_Wall_and_CapsulexGram-Positive_cell_wall_componentsxTeichoic_and_lipoteichoic_acids_biosynthesis
172039471	GFSNQIQYLGSK	ref|NC_010546.1|:4702321-4703523_glycosyl_transferase,_group_1_[Cyanothece_sp._ATCC_51142	si_0202x1xCell_Wall_and_CapsulexGram-Positive_cell_wall_componentsxTeichoic_and_lipoteichoic_acids_biosynthesis
172039471	IENQLVPLPQWVFPIEK	ref|NC_010546.1|:4702321-4703523_glycosyl_transferase,_group_1_[Cyanothece_sp._ATCC_51142	si_0202x1xCell_Wall_and_CapsulexGram-Positive_cell_wall_componentsxTeichoic_and_lipoteichoic_acids_biosynthesis
172039471	LYLIGPISLNPSWAK	ref|NC_010546.1|:4702321-4703523_glycosyl_transferase,_group_1_[Cyanothece_sp._ATCC_51142	si_0202x1xCell_Wall_and_CapsulexGram-Positive_cell_wall_componentsxTeichoic_and_lipoteichoic_acids_biosynthesis
172039471	MANNLEETQK	ref|NC_010546.1|:4702321-4703523_glycosyl_transferase,_group_1_[Cyanothece_sp._ATCC_51142	si_0202x1xCell_Wall_and_CapsulexGram-Positive_cell_wall_componentsxTeichoic_and_lipoteichoic_acids_biosynthesis
172039471	NQTLLLDVFPK	ref|NC_010546.1|:4702321-4703523_glycosyl_transferase,_group_1_[Cyanothece_sp._ATCC_51142	si_0202x1xCell_Wall_and_CapsulexGram-Positive_cell_wall_componentsxTeichoic_and_lipoteichoic_acids_biosynthesis
172039471	TLTHNSGLPQAGKDILIALLTTGEPIIVVTK	ref|NC_010546.1|:4702321-4703523_glycosyl_transferase,_group_1_[Cyanothece_sp._ATCC_51142	si_0202x1xCell_Wall_and_CapsulexGram-Positive_cell_wall_componentsxTeichoic_and_lipoteichoic_acids_biosynthesis
172039471	TPIIASEVDGIPELIENESTGFLFSPK	ref|NC_010546.1|:4702321-4703523_glycosyl_transferase,_group_1_[Cyanothece_sp._ATCC_51142	si_0202x1xCell_Wall_and_CapsulexGram-Positive_cell_wall_componentsxTeichoic_and_lipoteichoic_acids_biosynthesis
172039471	TPIIASEVDGIPELIENESTGFLFSPKDPQTLVEAFKK	ref|NC_010546.1|:4702321-4703523_glycosyl_transferase,_group_1_[Cyanothece_sp._ATCC_51142	si_0202x1xCell_Wall_and_CapsulexGram-Positive_cell_wall_componentsxTeichoic_and_lipoteichoic_acids_biosynthesis
172039471	YWQEFSQSK	ref|NC_010546.1|:4702321-4703523_glycosyl_transferase,_group_1_[Cyanothece_sp._ATCC_51142	si_0202x1xCell_Wall_and_CapsulexGram-Positive_cell_wall_componentsxTeichoic_and_lipoteichoic_acids_biosynthesis
172039470	DLSTLAIVIDQVLSK	ref|NC_010546.1|:4701191-4702276_glycosyl_transferase,_group_1_[Cyanothece_sp._ATCC_51142	si_0962x1xNo_Function_MatchxNo_Function_MatchxNone
172039470	DTFAELLPIGDVDGFVNAILK	ref|NC_010546.1|:4701191-4702276_glycosyl_transferase,_group_1_[Cyanothece_sp._ATCC_51142	si_0962x1xNo_Function_MatchxNo_Function_MatchxNone
172039470	EVSYFEQYLPGR	ref|NC_010546.1|:4701191-4702276_glycosyl_transferase,_group_1_[Cyanothece_sp._ATCC_51142	si_0962x1xNo_Function_MatchxNo_Function_MatchxNone
172039470	FAEEELDWIK	ref|NC_010546.1|:4701191-4702276_glycosyl_transferase,_group_1_[Cyanothece_sp._ATCC_51142	si_0962x1xNo_Function_MatchxNo_Function_MatchxNone
172039470	GSPMYALDSTTAEIK	ref|NC_010546.1|:4701191-4702276_glycosyl_transferase,_group_1_[Cyanothece_sp._ATCC_51142	si_0962x1xNo_Function_MatchxNo_Function_MatchxNone
172039470	IANLDALIVLGSR	ref|NC_010546.1|:4701191-4702276_glycosyl_transferase,_group_1_[Cyanothece_sp._ATCC_51142	si_0962x1xNo_Function_MatchxNo_Function_MatchxNone
172039470	KFAEEELDWIK	ref|NC_010546.1|:4701191-4702276_glycosyl_transferase,_group_1_[Cyanothece_sp._ATCC_51142	si_0962x1xNo_Function_MatchxNo_Function_MatchxNone
172039470	LTQDSEEQQTR	ref|NC_010546.1|:4701191-4702276_glycosyl_transferase,_group_1_[Cyanothece_sp._ATCC_51142	si_0962x1xNo_Function_MatchxNo_Function_MatchxNone
172039470	NPEIQFDIIMPR	ref|NC_010546.1|:4701191-4702276_glycosyl_transferase,_group_1_[Cyanothece_sp._ATCC_51142	si_0962x1xNo_Function_MatchxNo_Function_MatchxNone
172039470	NPGDRTNPTLIR	ref|NC_010546.1|:4701191-4702276_glycosyl_transferase,_group_1_[Cyanothece_sp._ATCC_51142	si_0962x1xNo_Function_MatchxNo_Function_MatchxNone
172039469	LSIDDISAK	ref|NC_010546.1|:4700298-4701122_hypothetical_protein_cce_4556_[Cyanothece_sp._ATCC_51142
172039469	QSHETLSQYSPAELENIK	ref|NC_010546.1|:4700298-4701122_hypothetical_protein_cce_4556_[Cyanothece_sp._ATCC_51142
172039469	YFSVVGLTEQFDETLILLK	ref|NC_010546.1|:4700298-4701122_hypothetical_protein_cce_4556_[Cyanothece_sp._ATCC_51142
172039468	AGNDDRLIATSLLR	ref|NC_010546.1|:4699019-4700260_putative_polysaccharide_pyruvyl_transferase_[Cyanothece_sp._ATCC_51142
172039468	ALSNFEIIFNTLK	ref|NC_010546.1|:4699019-4700260_putative_polysaccharide_pyruvyl_transferase_[Cyanothece_sp._ATCC_51142
172039468	ALSNFEIIFNTLKH	ref|NC_010546.1|:4699019-4700260_putative_polysaccharide_pyruvyl_transferase_[Cyanothece_sp._ATCC_51142
172039468	ASAIIASGGDIFSPEYPITPH	ref|NC_010546.1|:4699019-4700260_putative_polysaccharide_pyruvyl_transferase_[Cyanothece_sp._ATCC_51142
172039468	ASAIIASGGDIFSPEYPITPHLKPLK	ref|NC_010546.1|:4699019-4700260_putative_polysaccharide_pyruvyl_transferase_[Cyanothece_sp._ATCC_51142
172039468	GVEAIVIPTIEGLR	ref|NC_010546.1|:4699019-4700260_putative_polysaccharide_pyruvyl_transferase_[Cyanothece_sp._ATCC_51142
172039468	IQDKLPYIQK	ref|NC_010546.1|:4699019-4700260_putative_polysaccharide_pyruvyl_transferase_[Cyanothece_sp._ATCC_51142
172039468	IQDKLPYIQKK	ref|NC_010546.1|:4699019-4700260_putative_polysaccharide_pyruvyl_transferase_[Cyanothece_sp._ATCC_51142
172039468	KASAIIASGGDIFSPEYPITPH	ref|NC_010546.1|:4699019-4700260_putative_polysaccharide_pyruvyl_transferase_[Cyanothece_sp._ATCC_51142
172039468	LLSQVFPLYK	ref|NC_010546.1|:4699019-4700260_putative_polysaccharide_pyruvyl_transferase_[Cyanothece_sp._ATCC_51142
172039468	LQPYEVNLHLESK	ref|NC_010546.1|:4699019-4700260_putative_polysaccharide_pyruvyl_transferase_[Cyanothece_sp._ATCC_51142
172039468	LTADPAFLLKPSPDTTINNLLESYGIPK	ref|NC_010546.1|:4699019-4700260_putative_polysaccharide_pyruvyl_transferase_[Cyanothece_sp._ATCC_51142
172039468	SIIFLAQSISPYR	ref|NC_010546.1|:4699019-4700260_putative_polysaccharide_pyruvyl_transferase_[Cyanothece_sp._ATCC_51142
172039468	SIIFLAQSISPYRTDEEAESWLEVAR	ref|NC_010546.1|:4699019-4700260_putative_polysaccharide_pyruvyl_transferase_[Cyanothece_sp._ATCC_51142
172039468	SPDYDEIR	ref|NC_010546.1|:4699019-4700260_putative_polysaccharide_pyruvyl_transferase_[Cyanothece_sp._ATCC_51142
172039468	SPDYDEIRLQPYEVNLHLESK	ref|NC_010546.1|:4699019-4700260_putative_polysaccharide_pyruvyl_transferase_[Cyanothece_sp._ATCC_51142
172039468	TDEEAESWLEVAR	ref|NC_010546.1|:4699019-4700260_putative_polysaccharide_pyruvyl_transferase_[Cyanothece_sp._ATCC_51142
172039468	TYNPSIDINLLTR	ref|NC_010546.1|:4699019-4700260_putative_polysaccharide_pyruvyl_transferase_[Cyanothece_sp._ATCC_51142
172039468	VHVAGADHSASEFK	ref|NC_010546.1|:4699019-4700260_putative_polysaccharide_pyruvyl_transferase_[Cyanothece_sp._ATCC_51142
172039468	VVITGITGMR	ref|NC_010546.1|:4699019-4700260_putative_polysaccharide_pyruvyl_transferase_[Cyanothece_sp._ATCC_51142
172039468	VVTTILEDLDADVMIIPHVQEVR	ref|NC_010546.1|:4699019-4700260_putative_polysaccharide_pyruvyl_transferase_[Cyanothece_sp._ATCC_51142
172039468	YVTEILGLSTDLVK	ref|NC_010546.1|:4699019-4700260_putative_polysaccharide_pyruvyl_transferase_[Cyanothece_sp._ATCC_51142
172039467	EAVGINDSQAVIMMIAVGHLPDELK	ref|NC_010546.1|:4697827-4698975_hypothetical_protein_cce_4554_[Cyanothece_sp._ATCC_51142	si_0962x1xNo_Function_MatchxNo_Function_MatchxNone
172039467	HFSNEEVDLSLIK	ref|NC_010546.1|:4697827-4698975_hypothetical_protein_cce_4554_[Cyanothece_sp._ATCC_51142	si_0962x1xNo_Function_MatchxNo_Function_MatchxNone
172039467	IIEDQKISEGGTK	ref|NC_010546.1|:4697827-4698975_hypothetical_protein_cce_4554_[Cyanothece_sp._ATCC_51142	si_0962x1xNo_Function_MatchxNo_Function_MatchxNone
172039467	LLENYTYDFER	ref|NC_010546.1|:4697827-4698975_hypothetical_protein_cce_4554_[Cyanothece_sp._ATCC_51142	si_0962x1xNo_Function_MatchxNo_Function_MatchxNone
172039467	VLSFQNGNR	ref|NC_010546.1|:4697827-4698975_hypothetical_protein_cce_4554_[Cyanothece_sp._ATCC_51142	si_0962x1xNo_Function_MatchxNo_Function_MatchxNone
172039466	FTGKPANIEDEK	ref|NC_010546.1|:4696939-4697784_hypothetical_protein_cce_4553_[Cyanothece_sp._ATCC_51142
172039466	FVIIQVMSGR	ref|NC_010546.1|:4696939-4697784_hypothetical_protein_cce_4553_[Cyanothece_sp._ATCC_51142
172039466	GGAGPYFFLK	ref|NC_010546.1|:4696939-4697784_hypothetical_protein_cce_4553_[Cyanothece_sp._ATCC_51142
172039466	LLDYINEAK	ref|NC_010546.1|:4696939-4697784_hypothetical_protein_cce_4553_[Cyanothece_sp._ATCC_51142
172039466	LNIPILNWGR	ref|NC_010546.1|:4696939-4697784_hypothetical_protein_cce_4553_[Cyanothece_sp._ATCC_51142
172039466	NTSSLFGK	ref|NC_010546.1|:4696939-4697784_hypothetical_protein_cce_4553_[Cyanothece_sp._ATCC_51142
172039466	SQGNSLYQSEGIGSYTR	ref|NC_010546.1|:4696939-4697784_hypothetical_protein_cce_4553_[Cyanothece_sp._ATCC_51142
172039466	YDETYVKK	ref|NC_010546.1|:4696939-4697784_hypothetical_protein_cce_4553_[Cyanothece_sp._ATCC_51142
172039465	AQLPENQYYELR	ref|NC_010546.1|:4695915-4696862_hypothetical_protein_cce_4552_[Cyanothece_sp._ATCC_51142	si_0962x1xNo_Function_MatchxNo_Function_MatchxNone
172039465	AQLQEIEQEAGNMLDR	ref|NC_010546.1|:4695915-4696862_hypothetical_protein_cce_4552_[Cyanothece_sp._ATCC_51142	si_0962x1xNo_Function_MatchxNo_Function_MatchxNone
172039465	AQLQEIEQEAGNMLDRLGYD	ref|NC_010546.1|:4695915-4696862_hypothetical_protein_cce_4552_[Cyanothece_sp._ATCC_51142	si_0962x1xNo_Function_MatchxNo_Function_MatchxNone
172039465	DGRDVALSLSK	ref|NC_010546.1|:4695915-4696862_hypothetical_protein_cce_4552_[Cyanothece_sp._ATCC_51142	si_0962x1xNo_Function_MatchxNo_Function_MatchxNone
172039465	FWVEPDRVNEFETTSDIHR	ref|NC_010546.1|:4695915-4696862_hypothetical_protein_cce_4552_[Cyanothece_sp._ATCC_51142	si_0962x1xNo_Function_MatchxNo_Function_MatchxNone
172039465	GDQVNSGIIER	ref|NC_010546.1|:4695915-4696862_hypothetical_protein_cce_4552_[Cyanothece_sp._ATCC_51142	si_0962x1xNo_Function_MatchxNo_Function_MatchxNone
172039465	IKEPAQPIYLSNLPYWIYK	ref|NC_010546.1|:4695915-4696862_hypothetical_protein_cce_4552_[Cyanothece_sp._ATCC_51142	si_0962x1xNo_Function_MatchxNo_Function_MatchxNone
172039465	LFGLISPNLKEPIFIVGSGR	ref|NC_010546.1|:4695915-4696862_hypothetical_protein_cce_4552_[Cyanothece_sp._ATCC_51142	si_0962x1xNo_Function_MatchxNo_Function_MatchxNone
172039465	LLDFLEITSTLSR	ref|NC_010546.1|:4695915-4696862_hypothetical_protein_cce_4552_[Cyanothece_sp._ATCC_51142	si_0962x1xNo_Function_MatchxNo_Function_MatchxNone
172039465	NSFIIPFLYETFPDAK	ref|NC_010546.1|:4695915-4696862_hypothetical_protein_cce_4552_[Cyanothece_sp._ATCC_51142	si_0962x1xNo_Function_MatchxNo_Function_MatchxNone
172039465	VNEFETTSDIHR	ref|NC_010546.1|:4695915-4696862_hypothetical_protein_cce_4552_[Cyanothece_sp._ATCC_51142	si_0962x1xNo_Function_MatchxNo_Function_MatchxNone
172039465	YLETILEAK	ref|NC_010546.1|:4695915-4696862_hypothetical_protein_cce_4552_[Cyanothece_sp._ATCC_51142	si_0962x1xNo_Function_MatchxNo_Function_MatchxNone
172039464	FAIADYDLDGDTDVFALSK	ref|NC_010546.1|:4693851-4695794_hypothetical_protein_cce_4551_[Cyanothece_sp._ATCC_51142	si_0962x1xNo_Function_MatchxNo_Function_MatchxNone
172039464	FEDKIENSNILK	ref|NC_010546.1|:4693851-4695794_hypothetical_protein_cce_4551_[Cyanothece_sp._ATCC_51142	si_0962x1xNo_Function_MatchxNo_Function_MatchxNone
172039464	KFAIADYDLDGDTDVFALSK	ref|NC_010546.1|:4693851-4695794_hypothetical_protein_cce_4551_[Cyanothece_sp._ATCC_51142	si_0962x1xNo_Function_MatchxNo_Function_MatchxNone
172039464	LGLPMLGHTANWVDYDNDGLPDLHIIPDGLYHQDSDHTFTK	ref|NC_010546.1|:4693851-4695794_hypothetical_protein_cce_4551_[Cyanothece_sp._ATCC_51142	si_0962x1xNo_Function_MatchxNo_Function_MatchxNone
172039464	MQELLDLEVFRDELLVR	ref|NC_010546.1|:4693851-4695794_hypothetical_protein_cce_4551_[Cyanothece_sp._ATCC_51142	si_0962x1xNo_Function_MatchxNo_Function_MatchxNone
172039463	DTLSSPLLKPLK	ref|NC_010546.1|:4692892-4693785_hypothetical_protein_cce_4550_[Cyanothece_sp._ATCC_51142
172039463	ELAVFDYKF	ref|NC_010546.1|:4692892-4693785_hypothetical_protein_cce_4550_[Cyanothece_sp._ATCC_51142
172039463	FEHLEEDFNK	ref|NC_010546.1|:4692892-4693785_hypothetical_protein_cce_4550_[Cyanothece_sp._ATCC_51142
172039463	FEHLEEDFNKILK	ref|NC_010546.1|:4692892-4693785_hypothetical_protein_cce_4550_[Cyanothece_sp._ATCC_51142
172039463	FGGEFIPKEHLYK	ref|NC_010546.1|:4692892-4693785_hypothetical_protein_cce_4550_[Cyanothece_sp._ATCC_51142
172039463	LLNIGFETWLEQR	ref|NC_010546.1|:4692892-4693785_hypothetical_protein_cce_4550_[Cyanothece_sp._ATCC_51142
172039463	NPFDSFATQYAR	ref|NC_010546.1|:4692892-4693785_hypothetical_protein_cce_4550_[Cyanothece_sp._ATCC_51142
172039463	SEDILFNSK	ref|NC_010546.1|:4692892-4693785_hypothetical_protein_cce_4550_[Cyanothece_sp._ATCC_51142
172039463	SFIYSENYVPSIYSPLLR	ref|NC_010546.1|:4692892-4693785_hypothetical_protein_cce_4550_[Cyanothece_sp._ATCC_51142
172039462	GAVLGFTKEEIDK	ref|NC_010546.1|:4691711-4692904_ATP-binding_protein_of_ABC_transporter_[Cyanothece_sp._ATCC_51142
172039462	QSLWYGVQDIMSEVTAR	ref|NC_010546.1|:4691711-4692904_ATP-binding_protein_of_ABC_transporter_[Cyanothece_sp._ATCC_51142
172039458	AIGSSLDAK	ref|NC_010546.1|:c4689129-4686250_isoleucyl-tRNA_synthetase_[Cyanothece_sp._ATCC_51142	si_0223x0.1xClustering-based_subsystemsxCell_DivisionxCell_Division_Cluster
172039458	DANEVIINELKEK	ref|NC_010546.1|:c4689129-4686250_isoleucyl-tRNA_synthetase_[Cyanothece_sp._ATCC_51142	si_0223x0.1xClustering-based_subsystemsxCell_DivisionxCell_Division_Cluster
172039458	DFALKTQEEQAK	ref|NC_010546.1|:c4689129-4686250_isoleucyl-tRNA_synthetase_[Cyanothece_sp._ATCC_51142	si_0223x0.1xClustering-based_subsystemsxCell_DivisionxCell_Division_Cluster
172039458	EKAIGSSLDAK	ref|NC_010546.1|:c4689129-4686250_isoleucyl-tRNA_synthetase_[Cyanothece_sp._ATCC_51142	si_0223x0.1xClustering-based_subsystemsxCell_DivisionxCell_Division_Cluster
172039458	FWADNQIYEK	ref|NC_010546.1|:c4689129-4686250_isoleucyl-tRNA_synthetase_[Cyanothece_sp._ATCC_51142	si_0223x0.1xClustering-based_subsystemsxCell_DivisionxCell_Division_Cluster
172039458	GIRNEVNNALELAR	ref|NC_010546.1|:c4689129-4686250_isoleucyl-tRNA_synthetase_[Cyanothece_sp._ATCC_51142	si_0223x0.1xClustering-based_subsystemsxCell_DivisionxCell_Division_Cluster
172039458	GNFTEEARQFAGLNVLKDANEVIINELKEK	ref|NC_010546.1|:c4689129-4686250_isoleucyl-tRNA_synthetase_[Cyanothece_sp._ATCC_51142	si_0223x0.1xClustering-based_subsystemsxCell_DivisionxCell_Division_Cluster
172039458	LSQENPEEVFVLHDGPPYANGSLHMGHALNK	ref|NC_010546.1|:c4689129-4686250_isoleucyl-tRNA_synthetase_[Cyanothece_sp._ATCC_51142	si_0223x0.1xClustering-based_subsystemsxCell_DivisionxCell_Division_Cluster
172039458	LYISHPESIR	ref|NC_010546.1|:c4689129-4686250_isoleucyl-tRNA_synthetase_[Cyanothece_sp._ATCC_51142	si_0223x0.1xClustering-based_subsystemsxCell_DivisionxCell_Division_Cluster
172039458	NQKQEPPYGADVLR	ref|NC_010546.1|:c4689129-4686250_isoleucyl-tRNA_synthetase_[Cyanothece_sp._ATCC_51142	si_0223x0.1xClustering-based_subsystemsxCell_DivisionxCell_Division_Cluster
172039458	QFAGLNVLKDANEVIINELK	ref|NC_010546.1|:c4689129-4686250_isoleucyl-tRNA_synthetase_[Cyanothece_sp._ATCC_51142	si_0223x0.1xClustering-based_subsystemsxCell_DivisionxCell_Division_Cluster
172039458	QFAGLNVLKDANEVIINELKEK	ref|NC_010546.1|:c4689129-4686250_isoleucyl-tRNA_synthetase_[Cyanothece_sp._ATCC_51142	si_0223x0.1xClustering-based_subsystemsxCell_DivisionxCell_Division_Cluster
172039458	QQLEKFNPADSLTGNHVDELR	ref|NC_010546.1|:c4689129-4686250_isoleucyl-tRNA_synthetase_[Cyanothece_sp._ATCC_51142	si_0223x0.1xClustering-based_subsystemsxCell_DivisionxCell_Division_Cluster
172039458	QRPELKYPADIYLEGSDQHR	ref|NC_010546.1|:c4689129-4686250_isoleucyl-tRNA_synthetase_[Cyanothece_sp._ATCC_51142	si_0223x0.1xClustering-based_subsystemsxCell_DivisionxCell_Division_Cluster
172039458	SIFAAFPIIK	ref|NC_010546.1|:c4689129-4686250_isoleucyl-tRNA_synthetase_[Cyanothece_sp._ATCC_51142	si_0223x0.1xClustering-based_subsystemsxCell_DivisionxCell_Division_Cluster
172039458	SLGNIVDPNVIINGGK	ref|NC_010546.1|:c4689129-4686250_isoleucyl-tRNA_synthetase_[Cyanothece_sp._ATCC_51142	si_0223x0.1xClustering-based_subsystemsxCell_DivisionxCell_Division_Cluster
172039458	SLGNIVDPNVIINGGKNQKQEPPYGADVLR	ref|NC_010546.1|:c4689129-4686250_isoleucyl-tRNA_synthetase_[Cyanothece_sp._ATCC_51142	si_0223x0.1xClustering-based_subsystemsxCell_DivisionxCell_Division_Cluster
172039458	SWGLPIPVFYDEETNEPLLTEETIK	ref|NC_010546.1|:c4689129-4686250_isoleucyl-tRNA_synthetase_[Cyanothece_sp._ATCC_51142	si_0223x0.1xClustering-based_subsystemsxCell_DivisionxCell_Division_Cluster
172039458	SYKDTVNLPK	ref|NC_010546.1|:c4689129-4686250_isoleucyl-tRNA_synthetase_[Cyanothece_sp._ATCC_51142	si_0223x0.1xClustering-based_subsystemsxCell_DivisionxCell_Division_Cluster
172039458	TDPKSYKDTVNLPK	ref|NC_010546.1|:c4689129-4686250_isoleucyl-tRNA_synthetase_[Cyanothece_sp._ATCC_51142	si_0223x0.1xClustering-based_subsystemsxCell_DivisionxCell_Division_Cluster
172039458	TSKQWENSELSASWAK	ref|NC_010546.1|:c4689129-4686250_isoleucyl-tRNA_synthetase_[Cyanothece_sp._ATCC_51142	si_0223x0.1xClustering-based_subsystemsxCell_DivisionxCell_Division_Cluster
172039458	TVLTHGFVLDEK	ref|NC_010546.1|:c4689129-4686250_isoleucyl-tRNA_synthetase_[Cyanothece_sp._ATCC_51142	si_0223x0.1xClustering-based_subsystemsxCell_DivisionxCell_Division_Cluster
172039458	TVQWIPAQGENR	ref|NC_010546.1|:c4689129-4686250_isoleucyl-tRNA_synthetase_[Cyanothece_sp._ATCC_51142	si_0223x0.1xClustering-based_subsystemsxCell_DivisionxCell_Division_Cluster
172039458	VLLYVPEQNLR	ref|NC_010546.1|:c4689129-4686250_isoleucyl-tRNA_synthetase_[Cyanothece_sp._ATCC_51142	si_0223x0.1xClustering-based_subsystemsxCell_DivisionxCell_Division_Cluster
172039454	ASDSKDITLLTNQKK	ref|NC_010546.1|:c4683395-4680855_DNA_gyrase_subunit_A_[Cyanothece_sp._ATCC_51142	si_0419x0.3xDNA_MetabolismxDNA_replicationxDNA_topoisomerases,_Type_II,_ATP-dependent
172039454	INELENLLNNRPEFLK	ref|NC_010546.1|:c4683395-4680855_DNA_gyrase_subunit_A_[Cyanothece_sp._ATCC_51142	si_0419x0.3xDNA_MetabolismxDNA_replicationxDNA_topoisomerases,_Type_II,_ATP-dependent
172039454	SYLEYAMSVIVGR	ref|NC_010546.1|:c4683395-4680855_DNA_gyrase_subunit_A_[Cyanothece_sp._ATCC_51142	si_0419x0.3xDNA_MetabolismxDNA_replicationxDNA_topoisomerases,_Type_II,_ATP-dependent
172039454	TALQQNFGAIMLALVDNQPR	ref|NC_010546.1|:c4683395-4680855_DNA_gyrase_subunit_A_[Cyanothece_sp._ATCC_51142	si_0419x0.3xDNA_MetabolismxDNA_replicationxDNA_topoisomerases,_Type_II,_ATP-dependent
172039454	VPDNHVPIYSEPIQER	ref|NC_010546.1|:c4683395-4680855_DNA_gyrase_subunit_A_[Cyanothece_sp._ATCC_51142	si_0419x0.3xDNA_MetabolismxDNA_replicationxDNA_topoisomerases,_Type_II,_ATP-dependent
172039454	VVGDVLGKYHPHGDQAVYDALVR	ref|NC_010546.1|:c4683395-4680855_DNA_gyrase_subunit_A_[Cyanothece_sp._ATCC_51142	si_0419x0.3xDNA_MetabolismxDNA_replicationxDNA_topoisomerases,_Type_II,_ATP-dependent
172039451	ELWYDEVLSLLLSTGQK	ref|NC_010546.1|:c4677983-4676331_hypothetical_protein_cce_4538_[Cyanothece_sp._ATCC_51142	si_0962x1xNo_Function_MatchxNo_Function_MatchxNone
172039451	SNNLSPVLAK	ref|NC_010546.1|:c4677983-4676331_hypothetical_protein_cce_4538_[Cyanothece_sp._ATCC_51142	si_0962x1xNo_Function_MatchxNo_Function_MatchxNone
172039451	TVLDNDYNLQSSQK	ref|NC_010546.1|:c4677983-4676331_hypothetical_protein_cce_4538_[Cyanothece_sp._ATCC_51142	si_0962x1xNo_Function_MatchxNo_Function_MatchxNone
172039447	IVEKPDNYNQIQR	ref|NC_010546.1|:4673981-4675381_light-independent_protochlorophyllide_reductase_subunit_N_[Cyanothece_sp._ATCC_51142	si_0389x1xCofactors,_Vitamins,_Prosthetic_Groups,_PigmentsxTetrapyrrolesxChlorophyll_Biosynthesis
172039439	IKTEQNGQLDILVNNVFSGVK	ref|NC_010546.1|:c4669056-4668082_short_chain_dehydrogenase/reductase_family_oxidoreductase_[Cyanothece_sp._ATCC_51142	si_0092x0.1xCarbohydratesxFermentationxAcetoin,_butanediol_metabolism
172039439	VHIIAELAQQYNIVDEK	ref|NC_010546.1|:c4669056-4668082_short_chain_dehydrogenase/reductase_family_oxidoreductase_[Cyanothece_sp._ATCC_51142	si_0092x0.1xCarbohydratesxFermentationxAcetoin,_butanediol_metabolism
172039437	SQLNDILDLAELGIK	ref|NC_010546.1|:4666791-4667513_ribonuclease_PH_[Cyanothece_sp._ATCC_51142	si_0258x0.2xClustering-based_subsystemsxProteasome_related_clustersxProteasome_subunit_alpha_archaeal_cluster
172039437	SQLNDILDLAELGIKELV	ref|NC_010546.1|:4666791-4667513_ribonuclease_PH_[Cyanothece_sp._ATCC_51142	si_0258x0.2xClustering-based_subsystemsxProteasome_related_clustersxProteasome_subunit_alpha_archaeal_cluster
172039437	SQLNDILDLAELGIKELVS	ref|NC_010546.1|:4666791-4667513_ribonuclease_PH_[Cyanothece_sp._ATCC_51142	si_0258x0.2xClustering-based_subsystemsxProteasome_related_clustersxProteasome_subunit_alpha_archaeal_cluster
172039437	SQLNDILDLAELGIKELVSLQNQALSQA	ref|NC_010546.1|:4666791-4667513_ribonuclease_PH_[Cyanothece_sp._ATCC_51142	si_0258x0.2xClustering-based_subsystemsxProteasome_related_clustersxProteasome_subunit_alpha_archaeal_cluster
172039437	TTSITGGYVALALALNK	ref|NC_010546.1|:4666791-4667513_ribonuclease_PH_[Cyanothece_sp._ATCC_51142	si_0258x0.2xClustering-based_subsystemsxProteasome_related_clustersxProteasome_subunit_alpha_archaeal_cluster
172039434	AIVLVEQNAK	ref|NC_010546.1|:c4664885-4664148_ATP-binding_protein_of_branched-chain_amino_acid_ABC_transporter_[Cyanothece_sp._ATCC_51142
172039434	DLNILQGINFR	ref|NC_010546.1|:c4664885-4664148_ATP-binding_protein_of_branched-chain_amino_acid_ABC_transporter_[Cyanothece_sp._ATCC_51142
172039434	DRFEGTGEELLNDPK	ref|NC_010546.1|:c4664885-4664148_ATP-binding_protein_of_branched-chain_amino_acid_ABC_transporter_[Cyanothece_sp._ATCC_51142
172039433	LANALEILALAEGLPGTADAINLR	ref|NC_010546.1|:c4663980-4662685_histidinol_dehydrogenase_[Cyanothece_sp._ATCC_51142	si_0035x1xAmino_Acids_and_DerivativesxHistidine_MetabolismxHistidine_Biosynthesis
172039432	ELVSQSNTEK	ref|NC_010546.1|:c4662526-4660853_hypothetical_protein_cce_4519_[Cyanothece_sp._ATCC_51142	si_0358x1xCofactors,_Vitamins,_Prosthetic_Groups,_PigmentsxCoenzyme_AxCoenzyme_A_Biosynthesis
172039429	AMGQYVNVK	ref|NC_010546.1|:4659563-4659895_hypothetical_protein_cce_4516_[Cyanothece_sp._ATCC_51142	si_0962x1xNo_Function_MatchxNo_Function_MatchxNone
172039429	DLFSVWSKEAEAALNAK	ref|NC_010546.1|:4659563-4659895_hypothetical_protein_cce_4516_[Cyanothece_sp._ATCC_51142	si_0962x1xNo_Function_MatchxNo_Function_MatchxNone
172039429	KAGVVVDLWK	ref|NC_010546.1|:4659563-4659895_hypothetical_protein_cce_4516_[Cyanothece_sp._ATCC_51142	si_0962x1xNo_Function_MatchxNo_Function_MatchxNone
172039425	AVDAVEFDGEQAK	ref|NC_010546.1|:4654700-4656499_aspartate_kinase_[Cyanothece_sp._ATCC_51142	si_0038x0.2xAmino_Acids_and_DerivativesxLysine,_threonine,_methionine,_and_cysteinexLysine_Biosynthesis_DAP_Pathway
172039425	GGSDTSAVALAAALK	ref|NC_010546.1|:4654700-4656499_aspartate_kinase_[Cyanothece_sp._ATCC_51142	si_0038x0.2xAmino_Acids_and_DerivativesxLysine,_threonine,_methionine,_and_cysteinexLysine_Biosynthesis_DAP_Pathway
172039425	IALLRVPDRPGIAAR	ref|NC_010546.1|:4654700-4656499_aspartate_kinase_[Cyanothece_sp._ATCC_51142	si_0038x0.2xAmino_Acids_and_DerivativesxLysine,_threonine,_methionine,_and_cysteinexLysine_Biosynthesis_DAP_Pathway
172039425	TTDTLVSLAQEITANPSRR	ref|NC_010546.1|:4654700-4656499_aspartate_kinase_[Cyanothece_sp._ATCC_51142	si_0038x0.2xAmino_Acids_and_DerivativesxLysine,_threonine,_methionine,_and_cysteinexLysine_Biosynthesis_DAP_Pathway
172039425	TTPSNVTEAEVMVETGVAK	ref|NC_010546.1|:4654700-4656499_aspartate_kinase_[Cyanothece_sp._ATCC_51142	si_0038x0.2xAmino_Acids_and_DerivativesxLysine,_threonine,_methionine,_and_cysteinexLysine_Biosynthesis_DAP_Pathway
172039425	VSIVGAGMVGQPGVAAK	ref|NC_010546.1|:4654700-4656499_aspartate_kinase_[Cyanothece_sp._ATCC_51142	si_0038x0.2xAmino_Acids_and_DerivativesxLysine,_threonine,_methionine,_and_cysteinexLysine_Biosynthesis_DAP_Pathway
172039425	YGGTSVGSVER	ref|NC_010546.1|:4654700-4656499_aspartate_kinase_[Cyanothece_sp._ATCC_51142	si_0038x0.2xAmino_Acids_and_DerivativesxLysine,_threonine,_methionine,_and_cysteinexLysine_Biosynthesis_DAP_Pathway
172039422	SNSRPILLKDAPVPYYIEQSQYFK	ref|NC_010546.1|:c4649853-4649293_hypothetical_protein_cce_4509_[Cyanothece_sp._ATCC_51142	si_0962x1xNo_Function_MatchxNo_Function_MatchxNone
172039419	ATVPVLWDK	ref|NC_010546.1|:4646273-4647277_hypothetical_protein_cce_4506_[Cyanothece_sp._ATCC_51142	si_0333x0.3xClustering-based_subsystemsxUnclassified_clustering-based_subsystemsxConserved_cluster_in_Enterobacteriaceae_downstream_from_YqjA,_a_DedA_family_protein
172039419	FDAVYYGLFK	ref|NC_010546.1|:4646273-4647277_hypothetical_protein_cce_4506_[Cyanothece_sp._ATCC_51142	si_0333x0.3xClustering-based_subsystemsxUnclassified_clustering-based_subsystemsxConserved_cluster_in_Enterobacteriaceae_downstream_from_YqjA,_a_DedA_family_protein
172039419	NESGAYIRPESEFR	ref|NC_010546.1|:4646273-4647277_hypothetical_protein_cce_4506_[Cyanothece_sp._ATCC_51142	si_0333x0.3xClustering-based_subsystemsxUnclassified_clustering-based_subsystemsxConserved_cluster_in_Enterobacteriaceae_downstream_from_YqjA,_a_DedA_family_protein
172039419	QTQTVVNNESADIIEILNR	ref|NC_010546.1|:4646273-4647277_hypothetical_protein_cce_4506_[Cyanothece_sp._ATCC_51142	si_0333x0.3xClustering-based_subsystemsxUnclassified_clustering-based_subsystemsxConserved_cluster_in_Enterobacteriaceae_downstream_from_YqjA,_a_DedA_family_protein
172039417	IIAPDLIGWGESSHLER	ref|NC_010546.1|:4644029-4644928_hypothetical_protein_cce_4504_[Cyanothece_sp._ATCC_51142	si_0569x1xMiscellaneousxPlant-Prokaryote_DOE_projectxSynechocystis_experimental
172039417	ISEEPVIAIASSLTAALTIR	ref|NC_010546.1|:4644029-4644928_hypothetical_protein_cce_4504_[Cyanothece_sp._ATCC_51142	si_0569x1xMiscellaneousxPlant-Prokaryote_DOE_projectxSynechocystis_experimental
172039417	KSQFTGPDIGR	ref|NC_010546.1|:4644029-4644928_hypothetical_protein_cce_4504_[Cyanothece_sp._ATCC_51142	si_0569x1xMiscellaneousxPlant-Prokaryote_DOE_projectxSynechocystis_experimental
172039417	NYTIEDYLTTLTEFIEK	ref|NC_010546.1|:4644029-4644928_hypothetical_protein_cce_4504_[Cyanothece_sp._ATCC_51142	si_0569x1xMiscellaneousxPlant-Prokaryote_DOE_projectxSynechocystis_experimental
172039417	SFFAQLVSTPIIDR	ref|NC_010546.1|:4644029-4644928_hypothetical_protein_cce_4504_[Cyanothece_sp._ATCC_51142	si_0569x1xMiscellaneousxPlant-Prokaryote_DOE_projectxSynechocystis_experimental
172039417	SLILTTPAGLSDFGENYTR	ref|NC_010546.1|:4644029-4644928_hypothetical_protein_cce_4504_[Cyanothece_sp._ATCC_51142	si_0569x1xMiscellaneousxPlant-Prokaryote_DOE_projectxSynechocystis_experimental
172039417	SQFTGPDIGRK	ref|NC_010546.1|:4644029-4644928_hypothetical_protein_cce_4504_[Cyanothece_sp._ATCC_51142	si_0569x1xMiscellaneousxPlant-Prokaryote_DOE_projectxSynechocystis_experimental
172039417	VAVTRPELFK	ref|NC_010546.1|:4644029-4644928_hypothetical_protein_cce_4504_[Cyanothece_sp._ATCC_51142	si_0569x1xMiscellaneousxPlant-Prokaryote_DOE_projectxSynechocystis_experimental
172039416	DVFESHHYAFHVSDEEFDSIFAR	ref|NC_010546.1|:4643436-4643801_hypothetical_protein_cce_4503_[Cyanothece_sp._ATCC_51142	si_0962x1xNo_Function_MatchxNo_Function_MatchxNone
172039416	GFYFYDLDGHNLELLTRV	ref|NC_010546.1|:4643436-4643801_hypothetical_protein_cce_4503_[Cyanothece_sp._ATCC_51142	si_0962x1xNo_Function_MatchxNo_Function_MatchxNone
172039416	QASAEFFAHLFGLK	ref|NC_010546.1|:4643436-4643801_hypothetical_protein_cce_4503_[Cyanothece_sp._ATCC_51142	si_0962x1xNo_Function_MatchxNo_Function_MatchxNone
172039416	TINLNHTIIPTK	ref|NC_010546.1|:4643436-4643801_hypothetical_protein_cce_4503_[Cyanothece_sp._ATCC_51142	si_0962x1xNo_Function_MatchxNo_Function_MatchxNone
172039416	VQEAELDYSSDPMHKNVGK	ref|NC_010546.1|:4643436-4643801_hypothetical_protein_cce_4503_[Cyanothece_sp._ATCC_51142	si_0962x1xNo_Function_MatchxNo_Function_MatchxNone
172039412	GAAYAEAKKIDPTVLIQFR	ref|NC_010546.1|:4640640-4641149_hypothetical_protein_cce_4499_[Cyanothece_sp._ATCC_51142	si_0962x1xNo_Function_MatchxNo_Function_MatchxNone
172039412	IIELPIGEETMK	ref|NC_010546.1|:4640640-4641149_hypothetical_protein_cce_4499_[Cyanothece_sp._ATCC_51142	si_0962x1xNo_Function_MatchxNo_Function_MatchxNone
172039412	KIDPTVLIQFR	ref|NC_010546.1|:4640640-4641149_hypothetical_protein_cce_4499_[Cyanothece_sp._ATCC_51142	si_0962x1xNo_Function_MatchxNo_Function_MatchxNone
172039412	LAGVEAPTIEDTETTFPELINR	ref|NC_010546.1|:4640640-4641149_hypothetical_protein_cce_4499_[Cyanothece_sp._ATCC_51142	si_0962x1xNo_Function_MatchxNo_Function_MatchxNone
172039412	LYPDMFPLSR	ref|NC_010546.1|:4640640-4641149_hypothetical_protein_cce_4499_[Cyanothece_sp._ATCC_51142	si_0962x1xNo_Function_MatchxNo_Function_MatchxNone
172039412	QVQIASDIAR	ref|NC_010546.1|:4640640-4641149_hypothetical_protein_cce_4499_[Cyanothece_sp._ATCC_51142	si_0962x1xNo_Function_MatchxNo_Function_MatchxNone
172039412	TIAYLETLTPEQIDGTETK	ref|NC_010546.1|:4640640-4641149_hypothetical_protein_cce_4499_[Cyanothece_sp._ATCC_51142	si_0962x1xNo_Function_MatchxNo_Function_MatchxNone
172039412	TLNNLVGILEK	ref|NC_010546.1|:4640640-4641149_hypothetical_protein_cce_4499_[Cyanothece_sp._ATCC_51142	si_0962x1xNo_Function_MatchxNo_Function_MatchxNone
172039412	TLNNLVGILEKGAAYAEAK	ref|NC_010546.1|:4640640-4641149_hypothetical_protein_cce_4499_[Cyanothece_sp._ATCC_51142	si_0962x1xNo_Function_MatchxNo_Function_MatchxNone
172039412	TLNNLVGILEKGAAYAEAKKIDPTVLIQFR	ref|NC_010546.1|:4640640-4641149_hypothetical_protein_cce_4499_[Cyanothece_sp._ATCC_51142	si_0962x1xNo_Function_MatchxNo_Function_MatchxNone
172039412	TLSMYQAGIPPLTR	ref|NC_010546.1|:4640640-4641149_hypothetical_protein_cce_4499_[Cyanothece_sp._ATCC_51142	si_0962x1xNo_Function_MatchxNo_Function_MatchxNone
172039411	FIDLILIDPFFIDK	ref|NC_010546.1|:4639691-4640545_alpha/beta_hydrolase_[Cyanothece_sp._ATCC_51142	si_0962x1xNo_Function_MatchxNo_Function_MatchxNone
172039411	LGMEEKEQGK	ref|NC_010546.1|:4639691-4640545_alpha/beta_hydrolase_[Cyanothece_sp._ATCC_51142	si_0962x1xNo_Function_MatchxNo_Function_MatchxNone
172039411	TYLQQLQIAEVPGNHWAFLVEPLMFNETVK	ref|NC_010546.1|:4639691-4640545_alpha/beta_hydrolase_[Cyanothece_sp._ATCC_51142	si_0962x1xNo_Function_MatchxNo_Function_MatchxNone
172039411	YAGLTEDINIPTLLIKPEK	ref|NC_010546.1|:4639691-4640545_alpha/beta_hydrolase_[Cyanothece_sp._ATCC_51142	si_0962x1xNo_Function_MatchxNo_Function_MatchxNone
172039410	TTTAIADTLIEK	ref|NC_010546.1|:4638883-4639698_inositol_monophosphate_family_protein_[Cyanothece_sp._ATCC_51142	si_0035x1xAmino_Acids_and_DerivativesxHistidine_MetabolismxHistidine_Biosynthesis
172039402	ALQEAAASELAAR	ref|NC_010546.1|:4633007-4633951_F0F1_ATP_synthase_subunit_gamma_[Cyanothece_sp._ATCC_51142	si_0791x1xRespirationxATP_synthasesxF0F1-type_ATP_synthase
172039402	AQEQVISTR	ref|NC_010546.1|:4633007-4633951_F0F1_ATP_synthase_subunit_gamma_[Cyanothece_sp._ATCC_51142	si_0791x1xRespirationxATP_synthasesxF0F1-type_ATP_synthase
172039402	AQEQVISTRPFADALANVLFNLLNR	ref|NC_010546.1|:4633007-4633951_F0F1_ATP_synthase_subunit_gamma_[Cyanothece_sp._ATCC_51142	si_0791x1xRespirationxATP_synthasesxF0F1-type_ATP_synthase
172039402	ATIADELLSLFLSETVDR	ref|NC_010546.1|:4633007-4633951_F0F1_ATP_synthase_subunit_gamma_[Cyanothece_sp._ATCC_51142	si_0791x1xRespirationxATP_synthasesxF0F1-type_ATP_synthase
172039402	ELKEQGVNYR	ref|NC_010546.1|:4633007-4633951_F0F1_ATP_synthase_subunit_gamma_[Cyanothece_sp._ATCC_51142	si_0791x1xRespirationxATP_synthasesxF0F1-type_ATP_synthase
172039402	FADALANVLFNLLNR	ref|NC_010546.1|:4633007-4633951_F0F1_ATP_synthase_subunit_gamma_[Cyanothece_sp._ATCC_51142	si_0791x1xRespirationxATP_synthasesxF0F1-type_ATP_synthase
172039402	FGDVSLPLLQQR	ref|NC_010546.1|:4633007-4633951_F0F1_ATP_synthase_subunit_gamma_[Cyanothece_sp._ATCC_51142	si_0791x1xRespirationxATP_synthasesxF0F1-type_ATP_synthase
172039402	FVSLISSRPVVQTLAPLTMQGLETEDDEIFR	ref|NC_010546.1|:4633007-4633951_F0F1_ATP_synthase_subunit_gamma_[Cyanothece_sp._ATCC_51142	si_0791x1xRespirationxATP_synthasesxF0F1-type_ATP_synthase
172039402	FVSLISSRPVVQTLAPLTMQGLETEDDEIFRLITR	ref|NC_010546.1|:4633007-4633951_F0F1_ATP_synthase_subunit_gamma_[Cyanothece_sp._ATCC_51142	si_0791x1xRespirationxATP_synthasesxF0F1-type_ATP_synthase
172039402	GIVVVSGDR	ref|NC_010546.1|:4633007-4633951_F0F1_ATP_synthase_subunit_gamma_[Cyanothece_sp._ATCC_51142	si_0791x1xRespirationxATP_synthasesxF0F1-type_ATP_synthase
172039402	LKFGDVSLPLLQQR	ref|NC_010546.1|:4633007-4633951_F0F1_ATP_synthase_subunit_gamma_[Cyanothece_sp._ATCC_51142	si_0791x1xRespirationxATP_synthasesxF0F1-type_ATP_synthase
172039402	LTMQGLETEDDEIFR	ref|NC_010546.1|:4633007-4633951_F0F1_ATP_synthase_subunit_gamma_[Cyanothece_sp._ATCC_51142	si_0791x1xRespirationxATP_synthasesxF0F1-type_ATP_synthase
172039402	MTAMSNASDNAGQLIGTLTLSYNK	ref|NC_010546.1|:4633007-4633951_F0F1_ATP_synthase_subunit_gamma_[Cyanothece_sp._ATCC_51142	si_0791x1xRespirationxATP_synthasesxF0F1-type_ATP_synthase
172039402	NQIPTADEAATIADELLSLFLSETVDR	ref|NC_010546.1|:4633007-4633951_F0F1_ATP_synthase_subunit_gamma_[Cyanothece_sp._ATCC_51142	si_0791x1xRespirationxATP_synthasesxF0F1-type_ATP_synthase
172039402	PFADALANVLFNLLNR	ref|NC_010546.1|:4633007-4633951_F0F1_ATP_synthase_subunit_gamma_[Cyanothece_sp._ATCC_51142	si_0791x1xRespirationxATP_synthasesxF0F1-type_ATP_synthase
172039402	PVVQTLAPLTMQGLETEDDEIFR	ref|NC_010546.1|:4633007-4633951_F0F1_ATP_synthase_subunit_gamma_[Cyanothece_sp._ATCC_51142	si_0791x1xRespirationxATP_synthasesxF0F1-type_ATP_synthase
172039402	RAQEQVISTRP	ref|NC_010546.1|:4633007-4633951_F0F1_ATP_synthase_subunit_gamma_[Cyanothece_sp._ATCC_51142	si_0791x1xRespirationxATP_synthasesxF0F1-type_ATP_synthase
172039402	YTGLNQIPTADEAATIADELLSLFLSETVDR	ref|NC_010546.1|:4633007-4633951_F0F1_ATP_synthase_subunit_gamma_[Cyanothece_sp._ATCC_51142	si_0791x1xRespirationxATP_synthasesxF0F1-type_ATP_synthase
172039402	YTGLNQIPTADEAATIADELLSLFLSETVDRVELIYTR	ref|NC_010546.1|:4633007-4633951_F0F1_ATP_synthase_subunit_gamma_[Cyanothece_sp._ATCC_51142	si_0791x1xRespirationxATP_synthasesxF0F1-type_ATP_synthase
172039401	ASTVAQVIGTLEEK	ref|NC_010546.1|:4631407-4632918_F0F1_ATP_synthase_subunit_alpha_[Cyanothece_sp._ATCC_51142	si_0581x0.5xMotility_and_ChemotaxisxFlagellar_motility_in_ProkaryotaxFlagellar_motility
172039401	ATEFAAGLR	ref|NC_010546.1|:4631407-4632918_F0F1_ATP_synthase_subunit_alpha_[Cyanothece_sp._ATCC_51142	si_0581x0.5xMotility_and_ChemotaxisxFlagellar_motility_in_ProkaryotaxFlagellar_motility
172039401	ATEFAAGLREYIATSKPK	ref|NC_010546.1|:4631407-4632918_F0F1_ATP_synthase_subunit_alpha_[Cyanothece_sp._ATCC_51142	si_0581x0.5xMotility_and_ChemotaxisxFlagellar_motility_in_ProkaryotaxFlagellar_motility
172039401	ATEFAAGLREYIATSKPKYPEIIK	ref|NC_010546.1|:4631407-4632918_F0F1_ATP_synthase_subunit_alpha_[Cyanothece_sp._ATCC_51142	si_0581x0.5xMotility_and_ChemotaxisxFlagellar_motility_in_ProkaryotaxFlagellar_motility
172039401	ATLVIYDDLSK	ref|NC_010546.1|:4631407-4632918_F0F1_ATP_synthase_subunit_alpha_[Cyanothece_sp._ATCC_51142	si_0581x0.5xMotility_and_ChemotaxisxFlagellar_motility_in_ProkaryotaxFlagellar_motility
172039401	ATLVIYDDLSKQAQAYR	ref|NC_010546.1|:4631407-4632918_F0F1_ATP_synthase_subunit_alpha_[Cyanothece_sp._ATCC_51142	si_0581x0.5xMotility_and_ChemotaxisxFlagellar_motility_in_ProkaryotaxFlagellar_motility
172039401	DQSVQVSNVGTVLQVGDGTAR	ref|NC_010546.1|:4631407-4632918_F0F1_ATP_synthase_subunit_alpha_[Cyanothece_sp._ATCC_51142	si_0581x0.5xMotility_and_ChemotaxisxFlagellar_motility_in_ProkaryotaxFlagellar_motility
172039401	EAISEYKQAFSA	ref|NC_010546.1|:4631407-4632918_F0F1_ATP_synthase_subunit_alpha_[Cyanothece_sp._ATCC_51142	si_0581x0.5xMotility_and_ChemotaxisxFlagellar_motility_in_ProkaryotaxFlagellar_motility
172039401	EAYPGDVFYIHSR	ref|NC_010546.1|:4631407-4632918_F0F1_ATP_synthase_subunit_alpha_[Cyanothece_sp._ATCC_51142	si_0581x0.5xMotility_and_ChemotaxisxFlagellar_motility_in_ProkaryotaxFlagellar_motility
172039401	ELIIGDRKTGK	ref|NC_010546.1|:4631407-4632918_F0F1_ATP_synthase_subunit_alpha_[Cyanothece_sp._ATCC_51142	si_0581x0.5xMotility_and_ChemotaxisxFlagellar_motility_in_ProkaryotaxFlagellar_motility
172039401	EQIESYDQSVQVSNVGTVLQVGDGTAR	ref|NC_010546.1|:4631407-4632918_F0F1_ATP_synthase_subunit_alpha_[Cyanothece_sp._ATCC_51142	si_0581x0.5xMotility_and_ChemotaxisxFlagellar_motility_in_ProkaryotaxFlagellar_motility
172039401	EYIATSKPK	ref|NC_010546.1|:4631407-4632918_F0F1_ATP_synthase_subunit_alpha_[Cyanothece_sp._ATCC_51142	si_0581x0.5xMotility_and_ChemotaxisxFlagellar_motility_in_ProkaryotaxFlagellar_motility
172039401	EYIATSKPKYPEIIK	ref|NC_010546.1|:4631407-4632918_F0F1_ATP_synthase_subunit_alpha_[Cyanothece_sp._ATCC_51142	si_0581x0.5xMotility_and_ChemotaxisxFlagellar_motility_in_ProkaryotaxFlagellar_motility
172039401	GDINTSESR	ref|NC_010546.1|:4631407-4632918_F0F1_ATP_synthase_subunit_alpha_[Cyanothece_sp._ATCC_51142	si_0581x0.5xMotility_and_ChemotaxisxFlagellar_motility_in_ProkaryotaxFlagellar_motility
172039401	GDVFYIHSR	ref|NC_010546.1|:4631407-4632918_F0F1_ATP_synthase_subunit_alpha_[Cyanothece_sp._ATCC_51142	si_0581x0.5xMotility_and_ChemotaxisxFlagellar_motility_in_ProkaryotaxFlagellar_motility
172039401	GQRELIIGDR	ref|NC_010546.1|:4631407-4632918_F0F1_ATP_synthase_subunit_alpha_[Cyanothece_sp._ATCC_51142	si_0581x0.5xMotility_and_ChemotaxisxFlagellar_motility_in_ProkaryotaxFlagellar_motility
172039401	GREAYPGDVFYIHSR	ref|NC_010546.1|:4631407-4632918_F0F1_ATP_synthase_subunit_alpha_[Cyanothece_sp._ATCC_51142	si_0581x0.5xMotility_and_ChemotaxisxFlagellar_motility_in_ProkaryotaxFlagellar_motility
172039401	GTGFGIQEGSSVQATGK	ref|NC_010546.1|:4631407-4632918_F0F1_ATP_synthase_subunit_alpha_[Cyanothece_sp._ATCC_51142	si_0581x0.5xMotility_and_ChemotaxisxFlagellar_motility_in_ProkaryotaxFlagellar_motility
172039401	IAQVPVGDAMIGR	ref|NC_010546.1|:4631407-4632918_F0F1_ATP_synthase_subunit_alpha_[Cyanothece_sp._ATCC_51142	si_0581x0.5xMotility_and_ChemotaxisxFlagellar_motility_in_ProkaryotaxFlagellar_motility
172039401	IAQVPVGDAMIGRVVDSLGRPIDGKGDINTSESR	ref|NC_010546.1|:4631407-4632918_F0F1_ATP_synthase_subunit_alpha_[Cyanothece_sp._ATCC_51142	si_0581x0.5xMotility_and_ChemotaxisxFlagellar_motility_in_ProkaryotaxFlagellar_motility
172039401	KLTDEAESLLK	ref|NC_010546.1|:4631407-4632918_F0F1_ATP_synthase_subunit_alpha_[Cyanothece_sp._ATCC_51142	si_0581x0.5xMotility_and_ChemotaxisxFlagellar_motility_in_ProkaryotaxFlagellar_motility
172039401	KLTDEAESLLKEAISEYK	ref|NC_010546.1|:4631407-4632918_F0F1_ATP_synthase_subunit_alpha_[Cyanothece_sp._ATCC_51142	si_0581x0.5xMotility_and_ChemotaxisxFlagellar_motility_in_ProkaryotaxFlagellar_motility
172039401	KLTDEAESLLKEAISEYKQA	ref|NC_010546.1|:4631407-4632918_F0F1_ATP_synthase_subunit_alpha_[Cyanothece_sp._ATCC_51142	si_0581x0.5xMotility_and_ChemotaxisxFlagellar_motility_in_ProkaryotaxFlagellar_motility
172039401	KLTDEAESLLKEAISEYKQAF	ref|NC_010546.1|:4631407-4632918_F0F1_ATP_synthase_subunit_alpha_[Cyanothece_sp._ATCC_51142	si_0581x0.5xMotility_and_ChemotaxisxFlagellar_motility_in_ProkaryotaxFlagellar_motility
172039401	KLTDEAESLLKEAISEYKQAFS	ref|NC_010546.1|:4631407-4632918_F0F1_ATP_synthase_subunit_alpha_[Cyanothece_sp._ATCC_51142	si_0581x0.5xMotility_and_ChemotaxisxFlagellar_motility_in_ProkaryotaxFlagellar_motility
172039401	KLTDEAESLLKEAISEYKQAFSA	ref|NC_010546.1|:4631407-4632918_F0F1_ATP_synthase_subunit_alpha_[Cyanothece_sp._ATCC_51142	si_0581x0.5xMotility_and_ChemotaxisxFlagellar_motility_in_ProkaryotaxFlagellar_motility
172039401	LELAQFAELEAFSQFASDLDAATQAQLAR	ref|NC_010546.1|:4631407-4632918_F0F1_ATP_synthase_subunit_alpha_[Cyanothece_sp._ATCC_51142	si_0581x0.5xMotility_and_ChemotaxisxFlagellar_motility_in_ProkaryotaxFlagellar_motility
172039401	LIESPAPGIIAR	ref|NC_010546.1|:4631407-4632918_F0F1_ATP_synthase_subunit_alpha_[Cyanothece_sp._ATCC_51142	si_0581x0.5xMotility_and_ChemotaxisxFlagellar_motility_in_ProkaryotaxFlagellar_motility
172039401	LIESPAPGIIARK	ref|NC_010546.1|:4631407-4632918_F0F1_ATP_synthase_subunit_alpha_[Cyanothece_sp._ATCC_51142	si_0581x0.5xMotility_and_ChemotaxisxFlagellar_motility_in_ProkaryotaxFlagellar_motility
172039401	LKLELAQFAELEAFSQFASDLDAATQAQLAR	ref|NC_010546.1|:4631407-4632918_F0F1_ATP_synthase_subunit_alpha_[Cyanothece_sp._ATCC_51142	si_0581x0.5xMotility_and_ChemotaxisxFlagellar_motility_in_ProkaryotaxFlagellar_motility
172039401	LRQILKQPENSPLAVWEQVAVA	ref|NC_010546.1|:4631407-4632918_F0F1_ATP_synthase_subunit_alpha_[Cyanothece_sp._ATCC_51142	si_0581x0.5xMotility_and_ChemotaxisxFlagellar_motility_in_ProkaryotaxFlagellar_motility
172039401	LTDEAESLLK	ref|NC_010546.1|:4631407-4632918_F0F1_ATP_synthase_subunit_alpha_[Cyanothece_sp._ATCC_51142	si_0581x0.5xMotility_and_ChemotaxisxFlagellar_motility_in_ProkaryotaxFlagellar_motility
172039401	LTDEAESLLKEAISEYK	ref|NC_010546.1|:4631407-4632918_F0F1_ATP_synthase_subunit_alpha_[Cyanothece_sp._ATCC_51142	si_0581x0.5xMotility_and_ChemotaxisxFlagellar_motility_in_ProkaryotaxFlagellar_motility
172039401	LTDEAESLLKEAISEYKQAFSA	ref|NC_010546.1|:4631407-4632918_F0F1_ATP_synthase_subunit_alpha_[Cyanothece_sp._ATCC_51142	si_0581x0.5xMotility_and_ChemotaxisxFlagellar_motility_in_ProkaryotaxFlagellar_motility
172039401	MQTGITAIDAMIPIGR	ref|NC_010546.1|:4631407-4632918_F0F1_ATP_synthase_subunit_alpha_[Cyanothece_sp._ATCC_51142	si_0581x0.5xMotility_and_ChemotaxisxFlagellar_motility_in_ProkaryotaxFlagellar_motility
172039401	NVGTVLQVGDGTAR	ref|NC_010546.1|:4631407-4632918_F0F1_ATP_synthase_subunit_alpha_[Cyanothece_sp._ATCC_51142	si_0581x0.5xMotility_and_ChemotaxisxFlagellar_motility_in_ProkaryotaxFlagellar_motility
172039401	PAINAGISVSR	ref|NC_010546.1|:4631407-4632918_F0F1_ATP_synthase_subunit_alpha_[Cyanothece_sp._ATCC_51142	si_0581x0.5xMotility_and_ChemotaxisxFlagellar_motility_in_ProkaryotaxFlagellar_motility
172039401	PIDGKGDINTSESR	ref|NC_010546.1|:4631407-4632918_F0F1_ATP_synthase_subunit_alpha_[Cyanothece_sp._ATCC_51142	si_0581x0.5xMotility_and_ChemotaxisxFlagellar_motility_in_ProkaryotaxFlagellar_motility
172039401	QAQAYRQLSLLLR	ref|NC_010546.1|:4631407-4632918_F0F1_ATP_synthase_subunit_alpha_[Cyanothece_sp._ATCC_51142	si_0581x0.5xMotility_and_ChemotaxisxFlagellar_motility_in_ProkaryotaxFlagellar_motility
172039401	QILKQPENSPLAVWEQVAVA	ref|NC_010546.1|:4631407-4632918_F0F1_ATP_synthase_subunit_alpha_[Cyanothece_sp._ATCC_51142	si_0581x0.5xMotility_and_ChemotaxisxFlagellar_motility_in_ProkaryotaxFlagellar_motility
172039401	QILKQPENSPLAVWEQVAVAYAGLNGYIDDVPVDK	ref|NC_010546.1|:4631407-4632918_F0F1_ATP_synthase_subunit_alpha_[Cyanothece_sp._ATCC_51142	si_0581x0.5xMotility_and_ChemotaxisxFlagellar_motility_in_ProkaryotaxFlagellar_motility
172039401	QILKQPENSPLAVWEQVAVAYAGLNGYIDDVPVDKATEFAAGLR	ref|NC_010546.1|:4631407-4632918_F0F1_ATP_synthase_subunit_alpha_[Cyanothece_sp._ATCC_51142	si_0581x0.5xMotility_and_ChemotaxisxFlagellar_motility_in_ProkaryotaxFlagellar_motility
172039401	SEKKLTDEAESLLKEAISEYK	ref|NC_010546.1|:4631407-4632918_F0F1_ATP_synthase_subunit_alpha_[Cyanothece_sp._ATCC_51142	si_0581x0.5xMotility_and_ChemotaxisxFlagellar_motility_in_ProkaryotaxFlagellar_motility
172039401	SEKKLTDEAESLLKEAISEYKQAFSA	ref|NC_010546.1|:4631407-4632918_F0F1_ATP_synthase_subunit_alpha_[Cyanothece_sp._ATCC_51142	si_0581x0.5xMotility_and_ChemotaxisxFlagellar_motility_in_ProkaryotaxFlagellar_motility
172039401	TAIAIDTIINQK	ref|NC_010546.1|:4631407-4632918_F0F1_ATP_synthase_subunit_alpha_[Cyanothece_sp._ATCC_51142	si_0581x0.5xMotility_and_ChemotaxisxFlagellar_motility_in_ProkaryotaxFlagellar_motility
172039401	TGKTAIAIDTIINQK	ref|NC_010546.1|:4631407-4632918_F0F1_ATP_synthase_subunit_alpha_[Cyanothece_sp._ATCC_51142	si_0581x0.5xMotility_and_ChemotaxisxFlagellar_motility_in_ProkaryotaxFlagellar_motility
172039401	VGSAAQTKAMK	ref|NC_010546.1|:4631407-4632918_F0F1_ATP_synthase_subunit_alpha_[Cyanothece_sp._ATCC_51142	si_0581x0.5xMotility_and_ChemotaxisxFlagellar_motility_in_ProkaryotaxFlagellar_motility
172039401	VSIRPDEISSIIR	ref|NC_010546.1|:4631407-4632918_F0F1_ATP_synthase_subunit_alpha_[Cyanothece_sp._ATCC_51142	si_0581x0.5xMotility_and_ChemotaxisxFlagellar_motility_in_ProkaryotaxFlagellar_motility
172039401	VSIRPDEISSIIREQIESYDQSVQVSNVGTVLQVGDGTAR	ref|NC_010546.1|:4631407-4632918_F0F1_ATP_synthase_subunit_alpha_[Cyanothece_sp._ATCC_51142	si_0581x0.5xMotility_and_ChemotaxisxFlagellar_motility_in_ProkaryotaxFlagellar_motility
172039401	VVDSLGRPIDGK	ref|NC_010546.1|:4631407-4632918_F0F1_ATP_synthase_subunit_alpha_[Cyanothece_sp._ATCC_51142	si_0581x0.5xMotility_and_ChemotaxisxFlagellar_motility_in_ProkaryotaxFlagellar_motility
172039401	VVDSLGRPIDGKGDINTSESR	ref|NC_010546.1|:4631407-4632918_F0F1_ATP_synthase_subunit_alpha_[Cyanothece_sp._ATCC_51142	si_0581x0.5xMotility_and_ChemotaxisxFlagellar_motility_in_ProkaryotaxFlagellar_motility
172039401	VVDSLGRPIDGKGDINTSESRLIESPAPGIIAR	ref|NC_010546.1|:4631407-4632918_F0F1_ATP_synthase_subunit_alpha_[Cyanothece_sp._ATCC_51142	si_0581x0.5xMotility_and_ChemotaxisxFlagellar_motility_in_ProkaryotaxFlagellar_motility
172039401	YAGLNGYIDDVPVDKATEFA	ref|NC_010546.1|:4631407-4632918_F0F1_ATP_synthase_subunit_alpha_[Cyanothece_sp._ATCC_51142	si_0581x0.5xMotility_and_ChemotaxisxFlagellar_motility_in_ProkaryotaxFlagellar_motility
172039401	YAGLNGYIDDVPVDKATEFAAGLR	ref|NC_010546.1|:4631407-4632918_F0F1_ATP_synthase_subunit_alpha_[Cyanothece_sp._ATCC_51142	si_0581x0.5xMotility_and_ChemotaxisxFlagellar_motility_in_ProkaryotaxFlagellar_motility
172039401	YAGLNGYIDDVPVDKATEFAAGLREYIATSKPK	ref|NC_010546.1|:4631407-4632918_F0F1_ATP_synthase_subunit_alpha_[Cyanothece_sp._ATCC_51142	si_0581x0.5xMotility_and_ChemotaxisxFlagellar_motility_in_ProkaryotaxFlagellar_motility
172039400	ALTGAESVELK	ref|NC_010546.1|:4630805-4631362_F0F1_ATP_synthase_subunit_delta_[Cyanothece_sp._ATCC_51142	si_0791x1xRespirationxATP_synthasesxF0F1-type_ATP_synthase
172039400	ALTGAESVELKTDIDPDLIGGVIIK	ref|NC_010546.1|:4630805-4631362_F0F1_ATP_synthase_subunit_delta_[Cyanothece_sp._ATCC_51142	si_0791x1xRespirationxATP_synthasesxF0F1-type_ATP_synthase
172039400	EFISSPIIK	ref|NC_010546.1|:4630805-4631362_F0F1_ATP_synthase_subunit_delta_[Cyanothece_sp._ATCC_51142	si_0791x1xRespirationxATP_synthasesxF0F1-type_ATP_synthase
172039400	EFISSPIIKDEDK	ref|NC_010546.1|:4630805-4631362_F0F1_ATP_synthase_subunit_delta_[Cyanothece_sp._ATCC_51142	si_0791x1xRespirationxATP_synthasesxF0F1-type_ATP_synthase
172039400	EFISSPIIKDEDKR	ref|NC_010546.1|:4630805-4631362_F0F1_ATP_synthase_subunit_delta_[Cyanothece_sp._ATCC_51142	si_0791x1xRespirationxATP_synthasesxF0F1-type_ATP_synthase
172039400	GSLFSTEIAEPYAQALMSLAQSR	ref|NC_010546.1|:4630805-4631362_F0F1_ATP_synthase_subunit_delta_[Cyanothece_sp._ATCC_51142	si_0791x1xRespirationxATP_synthasesxF0F1-type_ATP_synthase
172039400	KLTNTVLAEVTASTELSEGQR	ref|NC_010546.1|:4630805-4631362_F0F1_ATP_synthase_subunit_delta_[Cyanothece_sp._ATCC_51142	si_0791x1xRespirationxATP_synthasesxF0F1-type_ATP_synthase
172039400	KLTNTVLAEVTASTELSEGQRR	ref|NC_010546.1|:4630805-4631362_F0F1_ATP_synthase_subunit_delta_[Cyanothece_sp._ATCC_51142	si_0791x1xRespirationxATP_synthasesxF0F1-type_ATP_synthase
172039400	LTNTVLAEVTASTELSEGQR	ref|NC_010546.1|:4630805-4631362_F0F1_ATP_synthase_subunit_delta_[Cyanothece_sp._ATCC_51142	si_0791x1xRespirationxATP_synthasesxF0F1-type_ATP_synthase
172039400	MKGSLFSTEIAEPYAQALMSLAQSR	ref|NC_010546.1|:4630805-4631362_F0F1_ATP_synthase_subunit_delta_[Cyanothece_sp._ATCC_51142	si_0791x1xRespirationxATP_synthasesxF0F1-type_ATP_synthase
172039400	NFLMLLVDK	ref|NC_010546.1|:4630805-4631362_F0F1_ATP_synthase_subunit_delta_[Cyanothece_sp._ATCC_51142	si_0791x1xRespirationxATP_synthasesxF0F1-type_ATP_synthase
172039400	NFLMLLVDKR	ref|NC_010546.1|:4630805-4631362_F0F1_ATP_synthase_subunit_delta_[Cyanothece_sp._ATCC_51142	si_0791x1xRespirationxATP_synthasesxF0F1-type_ATP_synthase
172039400	RISISLTGAS	ref|NC_010546.1|:4630805-4631362_F0F1_ATP_synthase_subunit_delta_[Cyanothece_sp._ATCC_51142	si_0791x1xRespirationxATP_synthasesxF0F1-type_ATP_synthase
172039400	SILDILEESAELR	ref|NC_010546.1|:4630805-4631362_F0F1_ATP_synthase_subunit_delta_[Cyanothece_sp._ATCC_51142	si_0791x1xRespirationxATP_synthasesxF0F1-type_ATP_synthase
172039400	SILDILEESAELREFISSPIIK	ref|NC_010546.1|:4630805-4631362_F0F1_ATP_synthase_subunit_delta_[Cyanothece_sp._ATCC_51142	si_0791x1xRespirationxATP_synthasesxF0F1-type_ATP_synthase
172039400	SILDILEESAELREFISSPIIKDEDK	ref|NC_010546.1|:4630805-4631362_F0F1_ATP_synthase_subunit_delta_[Cyanothece_sp._ATCC_51142	si_0791x1xRespirationxATP_synthasesxF0F1-type_ATP_synthase
172039400	SILDILEESAELREFISSPIIKDEDKR	ref|NC_010546.1|:4630805-4631362_F0F1_ATP_synthase_subunit_delta_[Cyanothece_sp._ATCC_51142	si_0791x1xRespirationxATP_synthasesxF0F1-type_ATP_synthase
172039400	TDIDPDLIGGVIIK	ref|NC_010546.1|:4630805-4631362_F0F1_ATP_synthase_subunit_delta_[Cyanothece_sp._ATCC_51142	si_0791x1xRespirationxATP_synthasesxF0F1-type_ATP_synthase
172039400	VGSQVFDASLR	ref|NC_010546.1|:4630805-4631362_F0F1_ATP_synthase_subunit_delta_[Cyanothece_sp._ATCC_51142	si_0791x1xRespirationxATP_synthasesxF0F1-type_ATP_synthase
172039400	VGSQVFDASLRGQLR	ref|NC_010546.1|:4630805-4631362_F0F1_ATP_synthase_subunit_delta_[Cyanothece_sp._ATCC_51142	si_0791x1xRespirationxATP_synthasesxF0F1-type_ATP_synthase
172039400	VGSQVFDASLRGQLRR	ref|NC_010546.1|:4630805-4631362_F0F1_ATP_synthase_subunit_delta_[Cyanothece_sp._ATCC_51142	si_0791x1xRespirationxATP_synthasesxF0F1-type_ATP_synthase
172039399	AEIAAQSER	ref|NC_010546.1|:4630248-4630802_F0F1_ATP_synthase_subunit_B_[Cyanothece_sp._ATCC_51142	si_0791x1xRespirationxATP_synthasesxF0F1-type_ATP_synthase
172039399	AEIAAQSERDIAR	ref|NC_010546.1|:4630248-4630802_F0F1_ATP_synthase_subunit_B_[Cyanothece_sp._ATCC_51142	si_0791x1xRespirationxATP_synthasesxF0F1-type_ATP_synthase
172039399	AESQLKAQVDNNTQQR	ref|NC_010546.1|:4630248-4630802_F0F1_ATP_synthase_subunit_B_[Cyanothece_sp._ATCC_51142	si_0791x1xRespirationxATP_synthasesxF0F1-type_ATP_synthase
172039399	AQVDNNTQQR	ref|NC_010546.1|:4630248-4630802_F0F1_ATP_synthase_subunit_B_[Cyanothece_sp._ATCC_51142	si_0791x1xRespirationxATP_synthasesxF0F1-type_ATP_synthase
172039399	EKENLAQAQK	ref|NC_010546.1|:4630248-4630802_F0F1_ATP_synthase_subunit_B_[Cyanothece_sp._ATCC_51142	si_0791x1xRespirationxATP_synthasesxF0F1-type_ATP_synthase
172039399	EKENLAQAQKEAAR	ref|NC_010546.1|:4630248-4630802_F0F1_ATP_synthase_subunit_B_[Cyanothece_sp._ATCC_51142	si_0791x1xRespirationxATP_synthasesxF0F1-type_ATP_synthase
172039399	ETAAADLSSEQER	ref|NC_010546.1|:4630248-4630802_F0F1_ATP_synthase_subunit_B_[Cyanothece_sp._ATCC_51142	si_0791x1xRespirationxATP_synthasesxF0F1-type_ATP_synthase
172039399	KVVGNILSER	ref|NC_010546.1|:4630248-4630802_F0F1_ATP_synthase_subunit_B_[Cyanothece_sp._ATCC_51142	si_0791x1xRespirationxATP_synthasesxF0F1-type_ATP_synthase
172039399	LKETAAADLSSEQER	ref|NC_010546.1|:4630248-4630802_F0F1_ATP_synthase_subunit_B_[Cyanothece_sp._ATCC_51142	si_0791x1xRespirationxATP_synthasesxF0F1-type_ATP_synthase
172039399	LKETAAADLSSEQERVMAQLKK	ref|NC_010546.1|:4630248-4630802_F0F1_ATP_synthase_subunit_B_[Cyanothece_sp._ATCC_51142	si_0791x1xRespirationxATP_synthasesxF0F1-type_ATP_synthase
172039399	NQIAQAIQEAEEK	ref|NC_010546.1|:4630248-4630802_F0F1_ATP_synthase_subunit_B_[Cyanothece_sp._ATCC_51142	si_0791x1xRespirationxATP_synthasesxF0F1-type_ATP_synthase
172039399	NQIAQAIQEAEEKQR	ref|NC_010546.1|:4630248-4630802_F0F1_ATP_synthase_subunit_B_[Cyanothece_sp._ATCC_51142	si_0791x1xRespirationxATP_synthasesxF0F1-type_ATP_synthase
172039399	QIAEQAIVK	ref|NC_010546.1|:4630248-4630802_F0F1_ATP_synthase_subunit_B_[Cyanothece_sp._ATCC_51142	si_0791x1xRespirationxATP_synthasesxF0F1-type_ATP_synthase
172039399	QIAEQAIVKAESQLK	ref|NC_010546.1|:4630248-4630802_F0F1_ATP_synthase_subunit_B_[Cyanothece_sp._ATCC_51142	si_0791x1xRespirationxATP_synthasesxF0F1-type_ATP_synthase
172039399	QIAEQAIVKAESQLKAQVDNNTQQR	ref|NC_010546.1|:4630248-4630802_F0F1_ATP_synthase_subunit_B_[Cyanothece_sp._ATCC_51142	si_0791x1xRespirationxATP_synthasesxF0F1-type_ATP_synthase
172039399	TAAQALAKEKENLAQAQK	ref|NC_010546.1|:4630248-4630802_F0F1_ATP_synthase_subunit_B_[Cyanothece_sp._ATCC_51142	si_0791x1xRespirationxATP_synthasesxF0F1-type_ATP_synthase
172039399	TLRAEIAAQSER	ref|NC_010546.1|:4630248-4630802_F0F1_ATP_synthase_subunit_B_[Cyanothece_sp._ATCC_51142	si_0791x1xRespirationxATP_synthasesxF0F1-type_ATP_synthase
172039399	TLRAEIAAQSERDIAR	ref|NC_010546.1|:4630248-4630802_F0F1_ATP_synthase_subunit_B_[Cyanothece_sp._ATCC_51142	si_0791x1xRespirationxATP_synthasesxF0F1-type_ATP_synthase
172039399	VVGNILSER	ref|NC_010546.1|:4630248-4630802_F0F1_ATP_synthase_subunit_B_[Cyanothece_sp._ATCC_51142	si_0791x1xRespirationxATP_synthasesxF0F1-type_ATP_synthase
172039398	ADYIRQNETGGQQQLAEAK	ref|NC_010546.1|:4629804-4630235_F0F1_ATP_synthase_subunit_B'_[Cyanothece_sp._ATCC_51142	si_0602x0.5xNucleosides_and_NucleotidesxPurinesxPurine_conversions
172039398	ADYIRQNETGGQQQLAEAKELAAKYEQQLAQAR	ref|NC_010546.1|:4629804-4630235_F0F1_ATP_synthase_subunit_B'_[Cyanothece_sp._ATCC_51142	si_0602x0.5xNucleosides_and_NucleotidesxPurinesxPurine_conversions
172039398	ALDERADYIRQNETGGQQQLAEAK	ref|NC_010546.1|:4629804-4630235_F0F1_ATP_synthase_subunit_B'_[Cyanothece_sp._ATCC_51142	si_0602x0.5xNucleosides_and_NucleotidesxPurinesxPurine_conversions
172039398	EAAAQEIEQQR	ref|NC_010546.1|:4629804-4630235_F0F1_ATP_synthase_subunit_B'_[Cyanothece_sp._ATCC_51142	si_0602x0.5xNucleosides_and_NucleotidesxPurinesxPurine_conversions
172039398	EAAAQEIEQQRQEALK	ref|NC_010546.1|:4629804-4630235_F0F1_ATP_synthase_subunit_B'_[Cyanothece_sp._ATCC_51142	si_0602x0.5xNucleosides_and_NucleotidesxPurinesxPurine_conversions
172039398	EAAAQEIEQQRQEALKTLEQQVDTLSR	ref|NC_010546.1|:4629804-4630235_F0F1_ATP_synthase_subunit_B'_[Cyanothece_sp._ATCC_51142	si_0602x0.5xNucleosides_and_NucleotidesxPurinesxPurine_conversions
172039398	ELAAKYEQQLAQAR	ref|NC_010546.1|:4629804-4630235_F0F1_ATP_synthase_subunit_B'_[Cyanothece_sp._ATCC_51142	si_0602x0.5xNucleosides_and_NucleotidesxPurinesxPurine_conversions
172039398	ESQDIVAQAQAEAK	ref|NC_010546.1|:4629804-4630235_F0F1_ATP_synthase_subunit_B'_[Cyanothece_sp._ATCC_51142	si_0602x0.5xNucleosides_and_NucleotidesxPurinesxPurine_conversions
172039398	ETGGQQQLAEAK	ref|NC_010546.1|:4629804-4630235_F0F1_ATP_synthase_subunit_B'_[Cyanothece_sp._ATCC_51142	si_0602x0.5xNucleosides_and_NucleotidesxPurinesxPurine_conversions
172039398	KEAAAQEIEQQRQEALK	ref|NC_010546.1|:4629804-4630235_F0F1_ATP_synthase_subunit_B'_[Cyanothece_sp._ATCC_51142	si_0602x0.5xNucleosides_and_NucleotidesxPurinesxPurine_conversions
172039398	KEAAAQEIEQQRQEALKTLEQQVDTLSR	ref|NC_010546.1|:4629804-4630235_F0F1_ATP_synthase_subunit_B'_[Cyanothece_sp._ATCC_51142	si_0602x0.5xNucleosides_and_NucleotidesxPurinesxPurine_conversions
172039398	KESQDIVAQAQAEAK	ref|NC_010546.1|:4629804-4630235_F0F1_ATP_synthase_subunit_B'_[Cyanothece_sp._ATCC_51142	si_0602x0.5xNucleosides_and_NucleotidesxPurinesxPurine_conversions
172039398	KESQDIVAQAQAEAKQLATEAVAEAQKEAIAKK	ref|NC_010546.1|:4629804-4630235_F0F1_ATP_synthase_subunit_B'_[Cyanothece_sp._ATCC_51142	si_0602x0.5xNucleosides_and_NucleotidesxPurinesxPurine_conversions
172039398	QEALKTLEQQVDTLSR	ref|NC_010546.1|:4629804-4630235_F0F1_ATP_synthase_subunit_B'_[Cyanothece_sp._ATCC_51142	si_0602x0.5xNucleosides_and_NucleotidesxPurinesxPurine_conversions
172039398	QLATEAVAEAQK	ref|NC_010546.1|:4629804-4630235_F0F1_ATP_synthase_subunit_B'_[Cyanothece_sp._ATCC_51142	si_0602x0.5xNucleosides_and_NucleotidesxPurinesxPurine_conversions
172039398	QLATEAVAEAQKEAIAK	ref|NC_010546.1|:4629804-4630235_F0F1_ATP_synthase_subunit_B'_[Cyanothece_sp._ATCC_51142	si_0602x0.5xNucleosides_and_NucleotidesxPurinesxPurine_conversions
172039398	QLATEAVAEAQKEAIAKK	ref|NC_010546.1|:4629804-4630235_F0F1_ATP_synthase_subunit_B'_[Cyanothece_sp._ATCC_51142	si_0602x0.5xNucleosides_and_NucleotidesxPurinesxPurine_conversions
172039398	QLATEAVAEAQKEAIAKKEAAAQEIEQQRQEALK	ref|NC_010546.1|:4629804-4630235_F0F1_ATP_synthase_subunit_B'_[Cyanothece_sp._ATCC_51142	si_0602x0.5xNucleosides_and_NucleotidesxPurinesxPurine_conversions
172039398	QLATEAVAEAQKEAIAKKEAAAQEIEQQRQEALKTLEQQVDTLSR	ref|NC_010546.1|:4629804-4630235_F0F1_ATP_synthase_subunit_B'_[Cyanothece_sp._ATCC_51142	si_0602x0.5xNucleosides_and_NucleotidesxPurinesxPurine_conversions
172039398	QNETGGQQQLAEAK	ref|NC_010546.1|:4629804-4630235_F0F1_ATP_synthase_subunit_B'_[Cyanothece_sp._ATCC_51142	si_0602x0.5xNucleosides_and_NucleotidesxPurinesxPurine_conversions
172039398	QNETGGQQQLAEAKELAAK	ref|NC_010546.1|:4629804-4630235_F0F1_ATP_synthase_subunit_B'_[Cyanothece_sp._ATCC_51142	si_0602x0.5xNucleosides_and_NucleotidesxPurinesxPurine_conversions
172039398	QNETGGQQQLAEAKELAAKYEQQLAQAR	ref|NC_010546.1|:4629804-4630235_F0F1_ATP_synthase_subunit_B'_[Cyanothece_sp._ATCC_51142	si_0602x0.5xNucleosides_and_NucleotidesxPurinesxPurine_conversions
172039398	TLEQQVDTLSR	ref|NC_010546.1|:4629804-4630235_F0F1_ATP_synthase_subunit_B'_[Cyanothece_sp._ATCC_51142	si_0602x0.5xNucleosides_and_NucleotidesxPurinesxPurine_conversions
172039398	YEQQLAQAR	ref|NC_010546.1|:4629804-4630235_F0F1_ATP_synthase_subunit_B'_[Cyanothece_sp._ATCC_51142	si_0602x0.5xNucleosides_and_NucleotidesxPurinesxPurine_conversions
172039398	YEQQLAQARK	ref|NC_010546.1|:4629804-4630235_F0F1_ATP_synthase_subunit_B'_[Cyanothece_sp._ATCC_51142	si_0602x0.5xNucleosides_and_NucleotidesxPurinesxPurine_conversions
172039397	ALAVGLGSIGPGLGQGNASGQAVSGIAR	ref|NC_010546.1|:4629472-4629717_F0F1_ATP_synthase_subunit_C_[Cyanothece_sp._ATCC_51142	si_0791x1xRespirationxATP_synthasesxF0F1-type_ATP_synthase
172039397	ASGQAVSGIAR	ref|NC_010546.1|:4629472-4629717_F0F1_ATP_synthase_subunit_C_[Cyanothece_sp._ATCC_51142	si_0791x1xRespirationxATP_synthasesxF0F1-type_ATP_synthase
172039397	GNASGQAVSGIAR	ref|NC_010546.1|:4629472-4629717_F0F1_ATP_synthase_subunit_C_[Cyanothece_sp._ATCC_51142	si_0791x1xRespirationxATP_synthasesxF0F1-type_ATP_synthase
172039397	MNPTVAAASVIAAALAVGLGSIGPGLGQGNASGQAVSGIAR	ref|NC_010546.1|:4629472-4629717_F0F1_ATP_synthase_subunit_C_[Cyanothece_sp._ATCC_51142	si_0791x1xRespirationxATP_synthasesxF0F1-type_ATP_synthase
172039397	SGQAVSGIAR	ref|NC_010546.1|:4629472-4629717_F0F1_ATP_synthase_subunit_C_[Cyanothece_sp._ATCC_51142	si_0791x1xRespirationxATP_synthasesxF0F1-type_ATP_synthase
172039397	SVIAAALAVGLGSIGPGLGQGNASGQAVSGIAR	ref|NC_010546.1|:4629472-4629717_F0F1_ATP_synthase_subunit_C_[Cyanothece_sp._ATCC_51142	si_0791x1xRespirationxATP_synthasesxF0F1-type_ATP_synthase
172039396	GLGYFANYVQPIPVLLPIK	ref|NC_010546.1|:4628461-4629216_F0F1_ATP_synthase_subunit_A_[Cyanothece_sp._ATCC_51142	si_0791x1xRespirationxATP_synthasesxF0F1-type_ATP_synthase
172039396	ILEDFTKPLSLSFR	ref|NC_010546.1|:4628461-4629216_F0F1_ATP_synthase_subunit_A_[Cyanothece_sp._ATCC_51142	si_0791x1xRespirationxATP_synthasesxF0F1-type_ATP_synthase
172039396	KGLGYFANYVQPIPVLLPIK	ref|NC_010546.1|:4628461-4629216_F0F1_ATP_synthase_subunit_A_[Cyanothece_sp._ATCC_51142	si_0791x1xRespirationxATP_synthasesxF0F1-type_ATP_synthase
172039396	LIEIPEGELAAPTNDINTTVALALLTSLAYFYAGLSK	ref|NC_010546.1|:4628461-4629216_F0F1_ATP_synthase_subunit_A_[Cyanothece_sp._ATCC_51142	si_0791x1xRespirationxATP_synthasesxF0F1-type_ATP_synthase
172039396	LIEIPEGELAAPTNDINTTVALALLTSLAYFYAGLSKK	ref|NC_010546.1|:4628461-4629216_F0F1_ATP_synthase_subunit_A_[Cyanothece_sp._ATCC_51142	si_0791x1xRespirationxATP_synthasesxF0F1-type_ATP_synthase
172039396	VPSGMQNFMEYVLEFLR	ref|NC_010546.1|:4628461-4629216_F0F1_ATP_synthase_subunit_A_[Cyanothece_sp._ATCC_51142	si_0791x1xRespirationxATP_synthasesxF0F1-type_ATP_synthase
172039396	YVQPIPVLLPIK	ref|NC_010546.1|:4628461-4629216_F0F1_ATP_synthase_subunit_A_[Cyanothece_sp._ATCC_51142	si_0791x1xRespirationxATP_synthasesxF0F1-type_ATP_synthase
172039395	TETTSQTAETTSAK	ref|NC_010546.1|:4628003-4628422_ATP_synthase_subunit_1_[Cyanothece_sp._ATCC_51142	si_0791x1xRespirationxATP_synthasesxF0F1-type_ATP_synthase
172039394	SPGKGLQPNR	ref|NC_010546.1|:4625506-4627755_N-acylneuraminate-9-phosphate_synthase_[Cyanothece_sp._ATCC_51142	si_0163x0.3xCell_Wall_and_CapsulexCapsular_and_extracellular_polysacchridesxCMP-N-acetylneuraminate_Biosynthesis
172039391	AAIGSDAFQETDIFGITLPIVK	ref|NC_010546.1|:c4622309-4620450_acetolactate_synthase_3_catalytic_subunit_[Cyanothece_sp._ATCC_51142	si_0023x0.2xAmino_Acids_and_DerivativesxBranched-chain_amino_acidsxBranched-Chain_Amino_Acid_Biosynthesis
172039391	FDDRVTGK	ref|NC_010546.1|:c4622309-4620450_acetolactate_synthase_3_catalytic_subunit_[Cyanothece_sp._ATCC_51142	si_0023x0.2xAmino_Acids_and_DerivativesxBranched-chain_amino_acidsxBranched-Chain_Amino_Acid_Biosynthesis
172039391	ISPQEVIVEVGR	ref|NC_010546.1|:c4622309-4620450_acetolactate_synthase_3_catalytic_subunit_[Cyanothece_sp._ATCC_51142	si_0023x0.2xAmino_Acids_and_DerivativesxBranched-chain_amino_acidsxBranched-Chain_Amino_Acid_Biosynthesis
172039389	LLETIKNDYQTFPK	ref|NC_010546.1|:c4619248-4618862_hypothetical_protein_cce_4476_[Cyanothece_sp._ATCC_51142	si_0962x1xNo_Function_MatchxNo_Function_MatchxNone
172039389	MKLLETIKNDYQTFPK	ref|NC_010546.1|:c4619248-4618862_hypothetical_protein_cce_4476_[Cyanothece_sp._ATCC_51142	si_0962x1xNo_Function_MatchxNo_Function_MatchxNone
172039388	FSSGVAVKS	ref|NC_010546.1|:c4618826-4617633_putative_arsenical_pump-driving_ATPase_[Cyanothece_sp._ATCC_51142	si_0581x0.3xMotility_and_ChemotaxisxFlagellar_motility_in_ProkaryotaxFlagellar_motility
172039388	GLDGVQAEELAILPGMDEIFGLVR	ref|NC_010546.1|:c4618826-4617633_putative_arsenical_pump-driving_ATPase_[Cyanothece_sp._ATCC_51142	si_0581x0.3xMotility_and_ChemotaxisxFlagellar_motility_in_ProkaryotaxFlagellar_motility
172039388	HYDEGEYDVLIIDSAPTGTALR	ref|NC_010546.1|:c4618826-4617633_putative_arsenical_pump-driving_ATPase_[Cyanothece_sp._ATCC_51142	si_0581x0.3xMotility_and_ChemotaxisxFlagellar_motility_in_ProkaryotaxFlagellar_motility
172039388	IIPDTVNDPFFEK	ref|NC_010546.1|:c4618826-4617633_putative_arsenical_pump-driving_ATPase_[Cyanothece_sp._ATCC_51142	si_0581x0.3xMotility_and_ChemotaxisxFlagellar_motility_in_ProkaryotaxFlagellar_motility
172039388	LLSIPEVGGWYMR	ref|NC_010546.1|:c4618826-4617633_putative_arsenical_pump-driving_ATPase_[Cyanothece_sp._ATCC_51142	si_0581x0.3xMotility_and_ChemotaxisxFlagellar_motility_in_ProkaryotaxFlagellar_motility
172039388	NLVLPQALAALNPSGAK	ref|NC_010546.1|:c4618826-4617633_putative_arsenical_pump-driving_ATPase_[Cyanothece_sp._ATCC_51142	si_0581x0.3xMotility_and_ChemotaxisxFlagellar_motility_in_ProkaryotaxFlagellar_motility
172039388	SVRPNLWGAELDALMELEGNWGAVKR	ref|NC_010546.1|:c4618826-4617633_putative_arsenical_pump-driving_ATPase_[Cyanothece_sp._ATCC_51142	si_0581x0.3xMotility_and_ChemotaxisxFlagellar_motility_in_ProkaryotaxFlagellar_motility
172039388	TLVLSTDPAHSLADSFDLELGHEPR	ref|NC_010546.1|:c4618826-4617633_putative_arsenical_pump-driving_ATPase_[Cyanothece_sp._ATCC_51142	si_0581x0.3xMotility_and_ChemotaxisxFlagellar_motility_in_ProkaryotaxFlagellar_motility
172039388	TSVAAATGLR	ref|NC_010546.1|:c4618826-4617633_putative_arsenical_pump-driving_ATPase_[Cyanothece_sp._ATCC_51142	si_0581x0.3xMotility_and_ChemotaxisxFlagellar_motility_in_ProkaryotaxFlagellar_motility
172039388	VLTDNKQTSVR	ref|NC_010546.1|:c4618826-4617633_putative_arsenical_pump-driving_ATPase_[Cyanothece_sp._ATCC_51142	si_0581x0.3xMotility_and_ChemotaxisxFlagellar_motility_in_ProkaryotaxFlagellar_motility
172039388	VQLNKTGDELNIR	ref|NC_010546.1|:c4618826-4617633_putative_arsenical_pump-driving_ATPase_[Cyanothece_sp._ATCC_51142	si_0581x0.3xMotility_and_ChemotaxisxFlagellar_motility_in_ProkaryotaxFlagellar_motility
172039388	YITQVLQAR	ref|NC_010546.1|:c4618826-4617633_putative_arsenical_pump-driving_ATPase_[Cyanothece_sp._ATCC_51142	si_0581x0.3xMotility_and_ChemotaxisxFlagellar_motility_in_ProkaryotaxFlagellar_motility
172039386	ALNRDWNTIKPIILGNGGAAR	ref|NC_010546.1|:4616104-4616970_shikimate_5-dehydrogenase_[Cyanothece_sp._ATCC_51142	si_0017x0.3xAmino_Acids_and_DerivativesxAromatic_amino_acids_and_derivativesxChorismate_Synthesis
172039386	LLGIIGHPVEHSLSPVMQNAEIK	ref|NC_010546.1|:4616104-4616970_shikimate_5-dehydrogenase_[Cyanothece_sp._ATCC_51142	si_0017x0.3xAmino_Acids_and_DerivativesxAromatic_amino_acids_and_derivativesxChorismate_Synthesis
172039386	LLGIIGHPVEHSLSPVMQNAEIKR	ref|NC_010546.1|:4616104-4616970_shikimate_5-dehydrogenase_[Cyanothece_sp._ATCC_51142	si_0017x0.3xAmino_Acids_and_DerivativesxAromatic_amino_acids_and_derivativesxChorismate_Synthesis
172039384	FIGDLSLFDYLR	ref|NC_010546.1|:c4615493-4614579_hypothetical_protein_cce_4471_[Cyanothece_sp._ATCC_51142	si_0308x1xClustering-based_subsystemsxUnclassified_clustering-based_subsystemsxCBSS-316273.3.peg.227
172039384	GLEDNDPSLKEPR	ref|NC_010546.1|:c4615493-4614579_hypothetical_protein_cce_4471_[Cyanothece_sp._ATCC_51142	si_0308x1xClustering-based_subsystemsxUnclassified_clustering-based_subsystemsxCBSS-316273.3.peg.227
172039384	NLDDVFIDPSLEDYR	ref|NC_010546.1|:c4615493-4614579_hypothetical_protein_cce_4471_[Cyanothece_sp._ATCC_51142	si_0308x1xClustering-based_subsystemsxUnclassified_clustering-based_subsystemsxCBSS-316273.3.peg.227
172039376	AAPYVITPTENTPK	ref|NC_010546.1|:4606203-4607057_arogenate_dehydrogenase_[Cyanothece_sp._ATCC_51142	si_0017x0.3xAmino_Acids_and_DerivativesxAromatic_amino_acids_and_derivativesxChorismate_Synthesis
172039376	TVLNLAQQLASSGFKDTSR	ref|NC_010546.1|:4606203-4607057_arogenate_dehydrogenase_[Cyanothece_sp._ATCC_51142	si_0017x0.3xAmino_Acids_and_DerivativesxAromatic_amino_acids_and_derivativesxChorismate_Synthesis
172039373	AEGIMFSLIDR	ref|NC_010546.1|:c4604859-4602988_prolyl-tRNA_synthetase_[Cyanothece_sp._ATCC_51142	si_0686x1xProtein_MetabolismxProtein_biosynthesisxtRNA_aminoacylation,_Pro
172039373	AEGIMFSLIDRQDRELGLGPTHEEVITTVAK	ref|NC_010546.1|:c4604859-4602988_prolyl-tRNA_synthetase_[Cyanothece_sp._ATCC_51142	si_0686x1xProtein_MetabolismxProtein_biosynthesisxtRNA_aminoacylation,_Pro
172039373	AGVKFKDADLIGIPYR	ref|NC_010546.1|:c4604859-4602988_prolyl-tRNA_synthetase_[Cyanothece_sp._ATCC_51142	si_0686x1xProtein_MetabolismxProtein_biosynthesisxtRNA_aminoacylation,_Pro
172039373	AVSLPKDVK	ref|NC_010546.1|:c4604859-4602988_prolyl-tRNA_synthetase_[Cyanothece_sp._ATCC_51142	si_0686x1xProtein_MetabolismxProtein_biosynthesisxtRNA_aminoacylation,_Pro
172039373	DADLIGIPYR	ref|NC_010546.1|:c4604859-4602988_prolyl-tRNA_synthetase_[Cyanothece_sp._ATCC_51142	si_0686x1xProtein_MetabolismxProtein_biosynthesisxtRNA_aminoacylation,_Pro
172039373	DAYSFNEDEASLQR	ref|NC_010546.1|:c4604859-4602988_prolyl-tRNA_synthetase_[Cyanothece_sp._ATCC_51142	si_0686x1xProtein_MetabolismxProtein_biosynthesisxtRNA_aminoacylation,_Pro
172039373	ELGLGPTHEEVITTVAK	ref|NC_010546.1|:c4604859-4602988_prolyl-tRNA_synthetase_[Cyanothece_sp._ATCC_51142	si_0686x1xProtein_MetabolismxProtein_biosynthesisxtRNA_aminoacylation,_Pro
172039373	ELGLGPTHEEVITTVAKDMIR	ref|NC_010546.1|:c4604859-4602988_prolyl-tRNA_synthetase_[Cyanothece_sp._ATCC_51142	si_0686x1xProtein_MetabolismxProtein_biosynthesisxtRNA_aminoacylation,_Pro
172039373	ESGRWETYTK	ref|NC_010546.1|:c4604859-4602988_prolyl-tRNA_synthetase_[Cyanothece_sp._ATCC_51142	si_0686x1xProtein_MetabolismxProtein_biosynthesisxtRNA_aminoacylation,_Pro
172039373	FKDADLIGIPYR	ref|NC_010546.1|:c4604859-4602988_prolyl-tRNA_synthetase_[Cyanothece_sp._ATCC_51142	si_0686x1xProtein_MetabolismxProtein_biosynthesisxtRNA_aminoacylation,_Pro
172039373	FKDADLIGIPYRVVTGR	ref|NC_010546.1|:c4604859-4602988_prolyl-tRNA_synthetase_[Cyanothece_sp._ATCC_51142	si_0686x1xProtein_MetabolismxProtein_biosynthesisxtRNA_aminoacylation,_Pro
172039373	GIEVGHIFQLGTK	ref|NC_010546.1|:c4604859-4602988_prolyl-tRNA_synthetase_[Cyanothece_sp._ATCC_51142	si_0686x1xProtein_MetabolismxProtein_biosynthesisxtRNA_aminoacylation,_Pro
172039373	GREFIMKDAYSFNEDEASLQR	ref|NC_010546.1|:c4604859-4602988_prolyl-tRNA_synthetase_[Cyanothece_sp._ATCC_51142	si_0686x1xProtein_MetabolismxProtein_biosynthesisxtRNA_aminoacylation,_Pro
172039373	LASNYQASTLLALTVPDENAQKK	ref|NC_010546.1|:c4604859-4602988_prolyl-tRNA_synthetase_[Cyanothece_sp._ATCC_51142	si_0686x1xProtein_MetabolismxProtein_biosynthesisxtRNA_aminoacylation,_Pro
172039373	LSQMLFVTLREDPAEAEIPSHK	ref|NC_010546.1|:c4604859-4602988_prolyl-tRNA_synthetase_[Cyanothece_sp._ATCC_51142	si_0686x1xProtein_MetabolismxProtein_biosynthesisxtRNA_aminoacylation,_Pro
172039373	MGVETLLDDRDERAGVK	ref|NC_010546.1|:c4604859-4602988_prolyl-tRNA_synthetase_[Cyanothece_sp._ATCC_51142	si_0686x1xProtein_MetabolismxProtein_biosynthesisxtRNA_aminoacylation,_Pro
172039373	NLVETLHNWVEQGK	ref|NC_010546.1|:c4604859-4602988_prolyl-tRNA_synthetase_[Cyanothece_sp._ATCC_51142	si_0686x1xProtein_MetabolismxProtein_biosynthesisxtRNA_aminoacylation,_Pro
172039373	NLVETLHNWVEQGKVNH	ref|NC_010546.1|:c4604859-4602988_prolyl-tRNA_synthetase_[Cyanothece_sp._ATCC_51142	si_0686x1xProtein_MetabolismxProtein_biosynthesisxtRNA_aminoacylation,_Pro
172039373	NVLYEAVYDNAK	ref|NC_010546.1|:c4604859-4602988_prolyl-tRNA_synthetase_[Cyanothece_sp._ATCC_51142	si_0686x1xProtein_MetabolismxProtein_biosynthesisxtRNA_aminoacylation,_Pro
172039373	SGKVEVVTR	ref|NC_010546.1|:c4604859-4602988_prolyl-tRNA_synthetase_[Cyanothece_sp._ATCC_51142	si_0686x1xProtein_MetabolismxProtein_biosynthesisxtRNA_aminoacylation,_Pro
172039373	SLPVGYISPNLEDDYIASGEYIEGK	ref|NC_010546.1|:c4604859-4602988_prolyl-tRNA_synthetase_[Cyanothece_sp._ATCC_51142	si_0686x1xProtein_MetabolismxProtein_biosynthesisxtRNA_aminoacylation,_Pro
172039373	SYDAMDQAYR	ref|NC_010546.1|:c4604859-4602988_prolyl-tRNA_synthetase_[Cyanothece_sp._ATCC_51142	si_0686x1xProtein_MetabolismxProtein_biosynthesisxtRNA_aminoacylation,_Pro
172039373	SYRQLPVNLYQIQTK	ref|NC_010546.1|:c4604859-4602988_prolyl-tRNA_synthetase_[Cyanothece_sp._ATCC_51142	si_0686x1xProtein_MetabolismxProtein_biosynthesisxtRNA_aminoacylation,_Pro
172039373	TSPFTTYEKK	ref|NC_010546.1|:c4604859-4602988_prolyl-tRNA_synthetase_[Cyanothece_sp._ATCC_51142	si_0686x1xProtein_MetabolismxProtein_biosynthesisxtRNA_aminoacylation,_Pro
172039370	EELGLELLDAGASQAFAVADHQLAHVYVNEPTMLLR	ref|NC_010546.1|:4599919-4601313_hypothetical_protein_cce_4457_[Cyanothece_sp._ATCC_51142	si_0962x1xNo_Function_MatchxNo_Function_MatchxNone
172039370	GLLEEIDGIDWVLDETGK	ref|NC_010546.1|:4599919-4601313_hypothetical_protein_cce_4457_[Cyanothece_sp._ATCC_51142	si_0962x1xNo_Function_MatchxNo_Function_MatchxNone
172039370	KIPDIYTQPADFRPQLQAELGQFPLFK	ref|NC_010546.1|:4599919-4601313_hypothetical_protein_cce_4457_[Cyanothece_sp._ATCC_51142	si_0962x1xNo_Function_MatchxNo_Function_MatchxNone
172039370	KPGYDPVELFIDPK	ref|NC_010546.1|:4599919-4601313_hypothetical_protein_cce_4457_[Cyanothece_sp._ATCC_51142	si_0962x1xNo_Function_MatchxNo_Function_MatchxNone
172039369	ELAPDAPFGIGLR	ref|NC_010546.1|:4598662-4599894_hypothetical_protein_cce_4456_[Cyanothece_sp._ATCC_51142	si_0962x1xNo_Function_MatchxNo_Function_MatchxNone
172039353	AALPVIVDYPLK	ref|NC_010546.1|:c4585859-4584762_3-dehydroquinate_synthase_[Cyanothece_sp._ATCC_51142	si_0017x0.2xAmino_Acids_and_DerivativesxAromatic_amino_acids_and_derivativesxChorismate_Synthesis
172039353	AALPVIVDYPLKSQAILESLQLDKK	ref|NC_010546.1|:c4585859-4584762_3-dehydroquinate_synthase_[Cyanothece_sp._ATCC_51142	si_0017x0.2xAmino_Acids_and_DerivativesxAromatic_amino_acids_and_derivativesxChorismate_Synthesis
172039353	EGVPSEVITR	ref|NC_010546.1|:c4585859-4584762_3-dehydroquinate_synthase_[Cyanothece_sp._ATCC_51142	si_0017x0.2xAmino_Acids_and_DerivativesxAromatic_amino_acids_and_derivativesxChorismate_Synthesis
172039353	FILPTDIGQVEIR	ref|NC_010546.1|:c4585859-4584762_3-dehydroquinate_synthase_[Cyanothece_sp._ATCC_51142	si_0017x0.2xAmino_Acids_and_DerivativesxAromatic_amino_acids_and_derivativesxChorismate_Synthesis
172039353	FILPTDIGQVEIREGVPSEVITR	ref|NC_010546.1|:c4585859-4584762_3-dehydroquinate_synthase_[Cyanothece_sp._ATCC_51142	si_0017x0.2xAmino_Acids_and_DerivativesxAromatic_amino_acids_and_derivativesxChorismate_Synthesis
172039353	GINFIQVPTSLLAMVDASIGGK	ref|NC_010546.1|:c4585859-4584762_3-dehydroquinate_synthase_[Cyanothece_sp._ATCC_51142	si_0017x0.2xAmino_Acids_and_DerivativesxAromatic_amino_acids_and_derivativesxChorismate_Synthesis
172039353	HLTSLNLEQK	ref|NC_010546.1|:c4585859-4584762_3-dehydroquinate_synthase_[Cyanothece_sp._ATCC_51142	si_0017x0.2xAmino_Acids_and_DerivativesxAromatic_amino_acids_and_derivativesxChorismate_Synthesis
172039353	ILVISNPEIFDYYGEIVINSLK	ref|NC_010546.1|:c4585859-4584762_3-dehydroquinate_synthase_[Cyanothece_sp._ATCC_51142	si_0017x0.2xAmino_Acids_and_DerivativesxAromatic_amino_acids_and_derivativesxChorismate_Synthesis
172039353	LVLIDPIVLK	ref|NC_010546.1|:c4585859-4584762_3-dehydroquinate_synthase_[Cyanothece_sp._ATCC_51142	si_0017x0.2xAmino_Acids_and_DerivativesxAromatic_amino_acids_and_derivativesxChorismate_Synthesis
172039353	NLIGAFYQPR	ref|NC_010546.1|:c4585859-4584762_3-dehydroquinate_synthase_[Cyanothece_sp._ATCC_51142	si_0017x0.2xAmino_Acids_and_DerivativesxAromatic_amino_acids_and_derivativesxChorismate_Synthesis
172039352	IMIHQPLGGAQGQAVEIEIQAK	ref|NC_010546.1|:c4584530-4583841_ATP-dependent_Clp_protease_proteolytic_subunit_[Cyanothece_sp._ATCC_51142	si_0699x0.3xProtein_MetabolismxProtein_degradationxProteasome_bacterial
172039352	IVFLGTPVDDQVADSIVAQLLFLDAEDPEK	ref|NC_010546.1|:c4584530-4583841_ATP-dependent_Clp_protease_proteolytic_subunit_[Cyanothece_sp._ATCC_51142	si_0699x0.3xProtein_MetabolismxProtein_degradationxProteasome_bacterial
172039352	VVEQSGVGER	ref|NC_010546.1|:c4584530-4583841_ATP-dependent_Clp_protease_proteolytic_subunit_[Cyanothece_sp._ATCC_51142	si_0699x0.3xProtein_MetabolismxProtein_degradationxProteasome_bacterial
172039351	DVSGEGVQQALLK	ref|NC_010546.1|:c4583829-4582522_ATP-dependent_protease_ATP-binding_subunit_ClpX_[Cyanothece_sp._ATCC_51142	si_0638x0.3xPhosphorus_MetabolismxUnclassified_phosphorus_metabolismxHigh_affinity_phosphate_transporter_and_control_of_PHO_regulon
172039351	IPVMAALNPLTEETLVAILTKPR	ref|NC_010546.1|:c4583829-4582522_ATP-dependent_protease_ATP-binding_subunit_ClpX_[Cyanothece_sp._ATCC_51142	si_0638x0.3xPhosphorus_MetabolismxUnclassified_phosphorus_metabolismxHigh_affinity_phosphate_transporter_and_control_of_PHO_regulon
172039349	ELAQQVAEALKDFSTER	ref|NC_010546.1|:c4580787-4579345_ATP-dependent_RNA_helicase_[Cyanothece_sp._ATCC_51142	si_0262x0.3xClustering-based_subsystemsxPutative_asociate_of_RNA_polymerase_sigma-54_factor_rpoNxCBSS-316057.3.peg.1308
172039349	IDQHLYMVPR	ref|NC_010546.1|:c4580787-4579345_ATP-dependent_RNA_helicase_[Cyanothece_sp._ATCC_51142	si_0262x0.3xClustering-based_subsystemsxPutative_asociate_of_RNA_polymerase_sigma-54_factor_rpoNxCBSS-316057.3.peg.1308
172039349	SPVTVSVER	ref|NC_010546.1|:c4580787-4579345_ATP-dependent_RNA_helicase_[Cyanothece_sp._ATCC_51142	si_0262x0.3xClustering-based_subsystemsxPutative_asociate_of_RNA_polymerase_sigma-54_factor_rpoNxCBSS-316057.3.peg.1308
172039345	AVEYLQSTGIGDTAFFGPEAEFFVFDDVR	ref|NC_010546.1|:4575467-4576888_glutamine_synthetase,_glutamate--ammonia_ligase_[Cyanothece_sp._ATCC_51142	si_0032x0.3xAmino_Acids_and_DerivativesxGlutamine,_glutamate,_aspartate,_asparagine;_ammonia_assimilationxGlutamine,_Glutamate,_Aspartate_and_Asparagine_Biosynthesis
172039345	EEEGGNLGYKPGYK	ref|NC_010546.1|:4575467-4576888_glutamine_synthetase,_glutamate--ammonia_ligase_[Cyanothece_sp._ATCC_51142	si_0032x0.3xAmino_Acids_and_DerivativesxGlutamine,_glutamate,_aspartate,_asparagine;_ammonia_assimilationxGlutamine,_Glutamate,_Aspartate_and_Asparagine_Biosynthesis
172039345	FATLIEAADYLMTYK	ref|NC_010546.1|:4575467-4576888_glutamine_synthetase,_glutamate--ammonia_ligase_[Cyanothece_sp._ATCC_51142	si_0032x0.3xAmino_Acids_and_DerivativesxGlutamine,_glutamate,_aspartate,_asparagine;_ammonia_assimilationxGlutamine,_Glutamate,_Aspartate_and_Asparagine_Biosynthesis
172039345	FDQTENKGYYYVDSIEGR	ref|NC_010546.1|:4575467-4576888_glutamine_synthetase,_glutamate--ammonia_ligase_[Cyanothece_sp._ATCC_51142	si_0032x0.3xAmino_Acids_and_DerivativesxGlutamine,_glutamate,_aspartate,_asparagine;_ammonia_assimilationxGlutamine,_Glutamate,_Aspartate_and_Asparagine_Biosynthesis
172039345	FIDLPGIWQH	ref|NC_010546.1|:4575467-4576888_glutamine_synthetase,_glutamate--ammonia_ligase_[Cyanothece_sp._ATCC_51142	si_0032x0.3xAmino_Acids_and_DerivativesxGlutamine,_glutamate,_aspartate,_asparagine;_ammonia_assimilationxGlutamine,_Glutamate,_Aspartate_and_Asparagine_Biosynthesis
172039345	GFEAPVNLAYSQGNR	ref|NC_010546.1|:4575467-4576888_glutamine_synthetase,_glutamate--ammonia_ligase_[Cyanothece_sp._ATCC_51142	si_0032x0.3xAmino_Acids_and_DerivativesxGlutamine,_glutamate,_aspartate,_asparagine;_ammonia_assimilationxGlutamine,_Glutamate,_Aspartate_and_Asparagine_Biosynthesis
172039345	GGEPLFWGDGYANLSK	ref|NC_010546.1|:4575467-4576888_glutamine_synthetase,_glutamate--ammonia_ligase_[Cyanothece_sp._ATCC_51142	si_0032x0.3xAmino_Acids_and_DerivativesxGlutamine,_glutamate,_aspartate,_asparagine;_ammonia_assimilationxGlutamine,_Glutamate,_Aspartate_and_Asparagine_Biosynthesis
172039345	GYYYVDSIEGR	ref|NC_010546.1|:4575467-4576888_glutamine_synthetase,_glutamate--ammonia_ligase_[Cyanothece_sp._ATCC_51142	si_0032x0.3xAmino_Acids_and_DerivativesxGlutamine,_glutamate,_aspartate,_asparagine;_ammonia_assimilationxGlutamine,_Glutamate,_Aspartate_and_Asparagine_Biosynthesis
172039345	HAPALLAFTNPTTNSY	ref|NC_010546.1|:4575467-4576888_glutamine_synthetase,_glutamate--ammonia_ligase_[Cyanothece_sp._ATCC_51142	si_0032x0.3xAmino_Acids_and_DerivativesxGlutamine,_glutamate,_aspartate,_asparagine;_ammonia_assimilationxGlutamine,_Glutamate,_Aspartate_and_Asparagine_Biosynthesis
172039345	HAPALLAFTNPTTNSYK	ref|NC_010546.1|:4575467-4576888_glutamine_synthetase,_glutamate--ammonia_ligase_[Cyanothece_sp._ATCC_51142	si_0032x0.3xAmino_Acids_and_DerivativesxGlutamine,_glutamate,_aspartate,_asparagine;_ammonia_assimilationxGlutamine,_Glutamate,_Aspartate_and_Asparagine_Biosynthesis
172039345	HAPALLAFTNPTTNSYKR	ref|NC_010546.1|:4575467-4576888_glutamine_synthetase,_glutamate--ammonia_ligase_[Cyanothece_sp._ATCC_51142	si_0032x0.3xAmino_Acids_and_DerivativesxGlutamine,_glutamate,_aspartate,_asparagine;_ammonia_assimilationxGlutamine,_Glutamate,_Aspartate_and_Asparagine_Biosynthesis
172039345	HPYEFALYYDV	ref|NC_010546.1|:4575467-4576888_glutamine_synthetase,_glutamate--ammonia_ligase_[Cyanothece_sp._ATCC_51142	si_0032x0.3xAmino_Acids_and_DerivativesxGlutamine,_glutamate,_aspartate,_asparagine;_ammonia_assimilationxGlutamine,_Glutamate,_Aspartate_and_Asparagine_Biosynthesis
172039345	IPLSGPNPK	ref|NC_010546.1|:4575467-4576888_glutamine_synthetase,_glutamate--ammonia_ligase_[Cyanothece_sp._ATCC_51142	si_0032x0.3xAmino_Acids_and_DerivativesxGlutamine,_glutamate,_aspartate,_asparagine;_ammonia_assimilationxGlutamine,_Glutamate,_Aspartate_and_Asparagine_Biosynthesis
172039345	IPSTPGSLEQALESLEK	ref|NC_010546.1|:4575467-4576888_glutamine_synthetase,_glutamate--ammonia_ligase_[Cyanothece_sp._ATCC_51142	si_0032x0.3xAmino_Acids_and_DerivativesxGlutamine,_glutamate,_aspartate,_asparagine;_ammonia_assimilationxGlutamine,_Glutamate,_Aspartate_and_Asparagine_Biosynthesis
172039345	IPSTPGSLEQALESLEKDHAFLIDGGVFTQDFIENWIEYK	ref|NC_010546.1|:4575467-4576888_glutamine_synthetase,_glutamate--ammonia_ligase_[Cyanothece_sp._ATCC_51142	si_0032x0.3xAmino_Acids_and_DerivativesxGlutamine,_glutamate,_aspartate,_asparagine;_ammonia_assimilationxGlutamine,_Glutamate,_Aspartate_and_Asparagine_Biosynthesis
172039345	LALNYIGGILK	ref|NC_010546.1|:4575467-4576888_glutamine_synthetase,_glutamate--ammonia_ligase_[Cyanothece_sp._ATCC_51142	si_0032x0.3xAmino_Acids_and_DerivativesxGlutamine,_glutamate,_aspartate,_asparagine;_ammonia_assimilationxGlutamine,_Glutamate,_Aspartate_and_Asparagine_Biosynthesis
172039345	LDNEVNPMR	ref|NC_010546.1|:4575467-4576888_glutamine_synthetase,_glutamate--ammonia_ligase_[Cyanothece_sp._ATCC_51142	si_0032x0.3xAmino_Acids_and_DerivativesxGlutamine,_glutamate,_aspartate,_asparagine;_ammonia_assimilationxGlutamine,_Glutamate,_Aspartate_and_Asparagine_Biosynthesis
172039345	LFNDNGSGMHTHQSIWK	ref|NC_010546.1|:4575467-4576888_glutamine_synthetase,_glutamate--ammonia_ligase_[Cyanothece_sp._ATCC_51142	si_0032x0.3xAmino_Acids_and_DerivativesxGlutamine,_glutamate,_aspartate,_asparagine;_ammonia_assimilationxGlutamine,_Glutamate,_Aspartate_and_Asparagine_Biosynthesis
172039345	LRPHPYEFA	ref|NC_010546.1|:4575467-4576888_glutamine_synthetase,_glutamate--ammonia_ligase_[Cyanothece_sp._ATCC_51142	si_0032x0.3xAmino_Acids_and_DerivativesxGlutamine,_glutamate,_aspartate,_asparagine;_ammonia_assimilationxGlutamine,_Glutamate,_Aspartate_and_Asparagine_Biosynthesis
172039345	LRPHPYEFALYYDV	ref|NC_010546.1|:4575467-4576888_glutamine_synthetase,_glutamate--ammonia_ligase_[Cyanothece_sp._ATCC_51142	si_0032x0.3xAmino_Acids_and_DerivativesxGlutamine,_glutamate,_aspartate,_asparagine;_ammonia_assimilationxGlutamine,_Glutamate,_Aspartate_and_Asparagine_Biosynthesis
172039345	LVPGFEAPVNLAYSQGNR	ref|NC_010546.1|:4575467-4576888_glutamine_synthetase,_glutamate--ammonia_ligase_[Cyanothece_sp._ATCC_51142	si_0032x0.3xAmino_Acids_and_DerivativesxGlutamine,_glutamate,_aspartate,_asparagine;_ammonia_assimilationxGlutamine,_Glutamate,_Aspartate_and_Asparagine_Biosynthesis
172039345	MIQDNNIKIIDLK	ref|NC_010546.1|:4575467-4576888_glutamine_synthetase,_glutamate--ammonia_ligase_[Cyanothece_sp._ATCC_51142	si_0032x0.3xAmino_Acids_and_DerivativesxGlutamine,_glutamate,_aspartate,_asparagine;_ammonia_assimilationxGlutamine,_Glutamate,_Aspartate_and_Asparagine_Biosynthesis
172039345	PLFNDNGSGMHTHQSIWK	ref|NC_010546.1|:4575467-4576888_glutamine_synthetase,_glutamate--ammonia_ligase_[Cyanothece_sp._ATCC_51142	si_0032x0.3xAmino_Acids_and_DerivativesxGlutamine,_glutamate,_aspartate,_asparagine;_ammonia_assimilationxGlutamine,_Glutamate,_Aspartate_and_Asparagine_Biosynthesis
172039345	QGYFPVAPTDTVQDMR	ref|NC_010546.1|:4575467-4576888_glutamine_synthetase,_glutamate--ammonia_ligase_[Cyanothece_sp._ATCC_51142	si_0032x0.3xAmino_Acids_and_DerivativesxGlutamine,_glutamate,_aspartate,_asparagine;_ammonia_assimilationxGlutamine,_Glutamate,_Aspartate_and_Asparagine_Biosynthesis
172039345	QGYFPVAPTDTVQDMRTEMLLTMAECGVPIEK	ref|NC_010546.1|:4575467-4576888_glutamine_synthetase,_glutamate--ammonia_ligase_[Cyanothece_sp._ATCC_51142	si_0032x0.3xAmino_Acids_and_DerivativesxGlutamine,_glutamate,_aspartate,_asparagine;_ammonia_assimilationxGlutamine,_Glutamate,_Aspartate_and_Asparagine_Biosynthesis
172039345	RLVPGFEAPVNLAYSQGNR	ref|NC_010546.1|:4575467-4576888_glutamine_synthetase,_glutamate--ammonia_ligase_[Cyanothece_sp._ATCC_51142	si_0032x0.3xAmino_Acids_and_DerivativesxGlutamine,_glutamate,_aspartate,_asparagine;_ammonia_assimilationxGlutamine,_Glutamate,_Aspartate_and_Asparagine_Biosynthesis
172039345	SASVRIPLSGPNP	ref|NC_010546.1|:4575467-4576888_glutamine_synthetase,_glutamate--ammonia_ligase_[Cyanothece_sp._ATCC_51142	si_0032x0.3xAmino_Acids_and_DerivativesxGlutamine,_glutamate,_aspartate,_asparagine;_ammonia_assimilationxGlutamine,_Glutamate,_Aspartate_and_Asparagine_Biosynthesis
172039345	SASVRIPLSGPNPK	ref|NC_010546.1|:4575467-4576888_glutamine_synthetase,_glutamate--ammonia_ligase_[Cyanothece_sp._ATCC_51142	si_0032x0.3xAmino_Acids_and_DerivativesxGlutamine,_glutamate,_aspartate,_asparagine;_ammonia_assimilationxGlutamine,_Glutamate,_Aspartate_and_Asparagine_Biosynthesis
172039345	TEMLLTMAECGVPIEK	ref|NC_010546.1|:4575467-4576888_glutamine_synthetase,_glutamate--ammonia_ligase_[Cyanothece_sp._ATCC_51142	si_0032x0.3xAmino_Acids_and_DerivativesxGlutamine,_glutamate,_aspartate,_asparagine;_ammonia_assimilationxGlutamine,_Glutamate,_Aspartate_and_Asparagine_Biosynthesis
172039345	TVTFMPKPLFNDNGSGMHTHQSIWK	ref|NC_010546.1|:4575467-4576888_glutamine_synthetase,_glutamate--ammonia_ligase_[Cyanothece_sp._ATCC_51142	si_0032x0.3xAmino_Acids_and_DerivativesxGlutamine,_glutamate,_aspartate,_asparagine;_ammonia_assimilationxGlutamine,_Glutamate,_Aspartate_and_Asparagine_Biosynthesis
172039345	TVTFMPKPLFNDNGSGMHTHQSIWKGGEPLFWGDGYANLSK	ref|NC_010546.1|:4575467-4576888_glutamine_synthetase,_glutamate--ammonia_ligase_[Cyanothece_sp._ATCC_51142	si_0032x0.3xAmino_Acids_and_DerivativesxGlutamine,_glutamate,_aspartate,_asparagine;_ammonia_assimilationxGlutamine,_Glutamate,_Aspartate_and_Asparagine_Biosynthesis
172039345	VAPTDTVQDMR	ref|NC_010546.1|:4575467-4576888_glutamine_synthetase,_glutamate--ammonia_ligase_[Cyanothece_sp._ATCC_51142	si_0032x0.3xAmino_Acids_and_DerivativesxGlutamine,_glutamate,_aspartate,_asparagine;_ammonia_assimilationxGlutamine,_Glutamate,_Aspartate_and_Asparagine_Biosynthesis
172039343	ISQTFSQDK	ref|NC_010546.1|:c4574430-4572079_putative_sialidase_[Cyanothece_sp._ATCC_51142	si_0962x1xNo_Function_MatchxNo_Function_MatchxNone
172039342	IETLDESLQR	ref|NC_010546.1|:c4572007-4571303_hypothetical_protein_cce_4429_[Cyanothece_sp._ATCC_51142	si_0962x1xNo_Function_MatchxNo_Function_MatchxNone
172039342	LAVDYVGKYETLMEDLEK	ref|NC_010546.1|:c4572007-4571303_hypothetical_protein_cce_4429_[Cyanothece_sp._ATCC_51142	si_0962x1xNo_Function_MatchxNo_Function_MatchxNone
172039342	QGKIETLDESLQR	ref|NC_010546.1|:c4572007-4571303_hypothetical_protein_cce_4429_[Cyanothece_sp._ATCC_51142	si_0962x1xNo_Function_MatchxNo_Function_MatchxNone
172039341	EINIDISQESLQEAMDAYGK	ref|NC_010546.1|:4570440-4571282_hypothetical_protein_cce_4428_[Cyanothece_sp._ATCC_51142	si_0962x1xNo_Function_MatchxNo_Function_MatchxNone
172039341	GYGESHIQYQSEADLK	ref|NC_010546.1|:4570440-4571282_hypothetical_protein_cce_4428_[Cyanothece_sp._ATCC_51142	si_0962x1xNo_Function_MatchxNo_Function_MatchxNone
172039341	IYFHNQEFTNFQDLEK	ref|NC_010546.1|:4570440-4571282_hypothetical_protein_cce_4428_[Cyanothece_sp._ATCC_51142	si_0962x1xNo_Function_MatchxNo_Function_MatchxNone
172039341	LSSLSEYAQIIHSK	ref|NC_010546.1|:4570440-4571282_hypothetical_protein_cce_4428_[Cyanothece_sp._ATCC_51142	si_0962x1xNo_Function_MatchxNo_Function_MatchxNone
172039341	NAVNYYTQR	ref|NC_010546.1|:4570440-4571282_hypothetical_protein_cce_4428_[Cyanothece_sp._ATCC_51142	si_0962x1xNo_Function_MatchxNo_Function_MatchxNone
172039341	SGSSLLTHILISNPAIK	ref|NC_010546.1|:4570440-4571282_hypothetical_protein_cce_4428_[Cyanothece_sp._ATCC_51142	si_0962x1xNo_Function_MatchxNo_Function_MatchxNone
172039340	FVQLSPIPLMWK	ref|NC_010546.1|:4569339-4570385_hypothetical_protein_cce_4427_[Cyanothece_sp._ATCC_51142
172039340	VLAMDTAPLIGDKR	ref|NC_010546.1|:4569339-4570385_hypothetical_protein_cce_4427_[Cyanothece_sp._ATCC_51142
172039339	IPLDALLIEVIEEQR	ref|NC_010546.1|:4567717-4569045_two-component_sensor_histidine_kinase_[Cyanothece_sp._ATCC_51142	si_0190x0.1xCell_Wall_and_CapsulexGram-Negative_cell_wall_componentsxLipid_A_modifications
172039339	QFTADASHELR	ref|NC_010546.1|:4567717-4569045_two-component_sensor_histidine_kinase_[Cyanothece_sp._ATCC_51142	si_0190x0.1xCell_Wall_and_CapsulexGram-Negative_cell_wall_componentsxLipid_A_modifications
172039337	AALQLLKDTPGKR	ref|NC_010546.1|:c4565967-4564609_UDP-N-acetylmuramoylalanyl-D-glutamate--2,6-diaminopimelate--D-alanyl-D-alanine_ligase_[Cyanothece_sp._ATCC_51142	si_0205x0.3xCell_Wall_and_CapsulexUnclassified_cell_wall_and_capsulexPeptidoglycan_Biosynthesis
172039337	AIDKGAIALILNHK	ref|NC_010546.1|:c4565967-4564609_UDP-N-acetylmuramoylalanyl-D-glutamate--2,6-diaminopimelate--D-alanyl-D-alanine_ligase_[Cyanothece_sp._ATCC_51142	si_0205x0.3xCell_Wall_and_CapsulexUnclassified_cell_wall_and_capsulexPeptidoglycan_Biosynthesis
172039337	ASNSVGLNR	ref|NC_010546.1|:c4565967-4564609_UDP-N-acetylmuramoylalanyl-D-glutamate--2,6-diaminopimelate--D-alanyl-D-alanine_ligase_[Cyanothece_sp._ATCC_51142	si_0205x0.3xCell_Wall_and_CapsulexUnclassified_cell_wall_and_capsulexPeptidoglycan_Biosynthesis
172039337	ASNSVGLNRVVEAVHNVISHQT	ref|NC_010546.1|:c4565967-4564609_UDP-N-acetylmuramoylalanyl-D-glutamate--2,6-diaminopimelate--D-alanyl-D-alanine_ligase_[Cyanothece_sp._ATCC_51142	si_0205x0.3xCell_Wall_and_CapsulexUnclassified_cell_wall_and_capsulexPeptidoglycan_Biosynthesis
172039337	ELGDASAQLHQEVGETAETLGIDGLYILVDDPEAQAIAQGVK	ref|NC_010546.1|:c4565967-4564609_UDP-N-acetylmuramoylalanyl-D-glutamate--2,6-diaminopimelate--D-alanyl-D-alanine_ligase_[Cyanothece_sp._ATCC_51142	si_0205x0.3xCell_Wall_and_CapsulexUnclassified_cell_wall_and_capsulexPeptidoglycan_Biosynthesis
172039337	GMDFPLPLPGR	ref|NC_010546.1|:c4565967-4564609_UDP-N-acetylmuramoylalanyl-D-glutamate--2,6-diaminopimelate--D-alanyl-D-alanine_ligase_[Cyanothece_sp._ATCC_51142	si_0205x0.3xCell_Wall_and_CapsulexUnclassified_cell_wall_and_capsulexPeptidoglycan_Biosynthesis
172039337	MILSEIPNILSNSLK	ref|NC_010546.1|:c4565967-4564609_UDP-N-acetylmuramoylalanyl-D-glutamate--2,6-diaminopimelate--D-alanyl-D-alanine_ligase_[Cyanothece_sp._ATCC_51142	si_0205x0.3xCell_Wall_and_CapsulexUnclassified_cell_wall_and_capsulexPeptidoglycan_Biosynthesis
172039337	NITENDIFLALKGDKFDGHLFAEK	ref|NC_010546.1|:c4565967-4564609_UDP-N-acetylmuramoylalanyl-D-glutamate--2,6-diaminopimelate--D-alanyl-D-alanine_ligase_[Cyanothece_sp._ATCC_51142	si_0205x0.3xCell_Wall_and_CapsulexUnclassified_cell_wall_and_capsulexPeptidoglycan_Biosynthesis
172039337	SQQYSLENDIILLDETYNAGLESMK	ref|NC_010546.1|:c4565967-4564609_UDP-N-acetylmuramoylalanyl-D-glutamate--2,6-diaminopimelate--D-alanyl-D-alanine_ligase_[Cyanothece_sp._ATCC_51142	si_0205x0.3xCell_Wall_and_CapsulexUnclassified_cell_wall_and_capsulexPeptidoglycan_Biosynthesis
172039337	TITYGLEGGDITGK	ref|NC_010546.1|:c4565967-4564609_UDP-N-acetylmuramoylalanyl-D-glutamate--2,6-diaminopimelate--D-alanyl-D-alanine_ligase_[Cyanothece_sp._ATCC_51142	si_0205x0.3xCell_Wall_and_CapsulexUnclassified_cell_wall_and_capsulexPeptidoglycan_Biosynthesis
172039337	TITYGLEGGDITGKVLENQILR	ref|NC_010546.1|:c4565967-4564609_UDP-N-acetylmuramoylalanyl-D-glutamate--2,6-diaminopimelate--D-alanyl-D-alanine_ligase_[Cyanothece_sp._ATCC_51142	si_0205x0.3xCell_Wall_and_CapsulexUnclassified_cell_wall_and_capsulexPeptidoglycan_Biosynthesis
172039337	TQANYNNEIGVPK	ref|NC_010546.1|:c4565967-4564609_UDP-N-acetylmuramoylalanyl-D-glutamate--2,6-diaminopimelate--D-alanyl-D-alanine_ligase_[Cyanothece_sp._ATCC_51142	si_0205x0.3xCell_Wall_and_CapsulexUnclassified_cell_wall_and_capsulexPeptidoglycan_Biosynthesis
172039337	VVEAVHNVISHQT	ref|NC_010546.1|:c4565967-4564609_UDP-N-acetylmuramoylalanyl-D-glutamate--2,6-diaminopimelate--D-alanyl-D-alanine_ligase_[Cyanothece_sp._ATCC_51142	si_0205x0.3xCell_Wall_and_CapsulexUnclassified_cell_wall_and_capsulexPeptidoglycan_Biosynthesis
172039336	GDAHVYTR	ref|NC_010546.1|:c4564488-4563520_3(2),5_-bisphosphate_nucleotidase_HAL2_[Cyanothece_sp._ATCC_51142	si_0962x1xNo_Function_MatchxNo_Function_MatchxNone
172039336	IESVESVHSDR	ref|NC_010546.1|:c4564488-4563520_3(2),5_-bisphosphate_nucleotidase_HAL2_[Cyanothece_sp._ATCC_51142	si_0962x1xNo_Function_MatchxNo_Function_MatchxNone
172039336	IESVESVHSDRQVQTAIDQR	ref|NC_010546.1|:c4564488-4563520_3(2),5_-bisphosphate_nucleotidase_HAL2_[Cyanothece_sp._ATCC_51142	si_0962x1xNo_Function_MatchxNo_Function_MatchxNone
172039336	QIIEQVQHSIPAATPEK	ref|NC_010546.1|:c4564488-4563520_3(2),5_-bisphosphate_nucleotidase_HAL2_[Cyanothece_sp._ATCC_51142	si_0962x1xNo_Function_MatchxNo_Function_MatchxNone
172039336	QIIEQVQHSIPAATPEKVIDWINWGNGK	ref|NC_010546.1|:c4564488-4563520_3(2),5_-bisphosphate_nucleotidase_HAL2_[Cyanothece_sp._ATCC_51142	si_0962x1xNo_Function_MatchxNo_Function_MatchxNone
172039336	QVQTAIDQR	ref|NC_010546.1|:c4564488-4563520_3(2),5_-bisphosphate_nucleotidase_HAL2_[Cyanothece_sp._ATCC_51142	si_0962x1xNo_Function_MatchxNo_Function_MatchxNone
172039336	VTDLDGKPLDFSVGAK	ref|NC_010546.1|:c4564488-4563520_3(2),5_-bisphosphate_nucleotidase_HAL2_[Cyanothece_sp._ATCC_51142	si_0962x1xNo_Function_MatchxNo_Function_MatchxNone
172039335	EENVSVETR	ref|NC_010546.1|:c4563224-4561578_hypothetical_protein_cce_4422_[Cyanothece_sp._ATCC_51142
172039335	IDQGWNQLVEK	ref|NC_010546.1|:c4563224-4561578_hypothetical_protein_cce_4422_[Cyanothece_sp._ATCC_51142
172039335	ILENTQKPLPENSLK	ref|NC_010546.1|:c4563224-4561578_hypothetical_protein_cce_4422_[Cyanothece_sp._ATCC_51142
172039335	IPAESQSILDSAK	ref|NC_010546.1|:c4563224-4561578_hypothetical_protein_cce_4422_[Cyanothece_sp._ATCC_51142
172039335	LANDNNFTVNER	ref|NC_010546.1|:c4563224-4561578_hypothetical_protein_cce_4422_[Cyanothece_sp._ATCC_51142
172039335	LVIAEKDYTIETAIDSFQGASSYADQPEVQDLLK	ref|NC_010546.1|:c4563224-4561578_hypothetical_protein_cce_4422_[Cyanothece_sp._ATCC_51142
172039335	NISFEKDIQPWIDGVTIAFLSSR	ref|NC_010546.1|:c4563224-4561578_hypothetical_protein_cce_4422_[Cyanothece_sp._ATCC_51142
172039335	QGLHLQAIANLNPDQIDKIPDAVPNNILSEFPGDTFLLANGYR	ref|NC_010546.1|:c4563224-4561578_hypothetical_protein_cce_4422_[Cyanothece_sp._ATCC_51142
172039335	QIASNTLDK	ref|NC_010546.1|:c4563224-4561578_hypothetical_protein_cce_4422_[Cyanothece_sp._ATCC_51142
172039335	QIASNTLDKLTK	ref|NC_010546.1|:c4563224-4561578_hypothetical_protein_cce_4422_[Cyanothece_sp._ATCC_51142
172039335	QLDEVESILIGIGAEK	ref|NC_010546.1|:c4563224-4561578_hypothetical_protein_cce_4422_[Cyanothece_sp._ATCC_51142
172039333	DAGISDNLDDTSDYR	ref|NC_010546.1|:c4560970-4560515_dihydroneopterin_aldolase_[Cyanothece_sp._ATCC_51142	si_0363x0.5xCofactors,_Vitamins,_Prosthetic_Groups,_PigmentsxFolate_and_pterinesxFolate_Biosynthesis
172039333	LAPPIPDFPGNITIDITR	ref|NC_010546.1|:c4560970-4560515_dihydroneopterin_aldolase_[Cyanothece_sp._ATCC_51142	si_0363x0.5xCofactors,_Vitamins,_Prosthetic_Groups,_PigmentsxFolate_and_pterinesxFolate_Biosynthesis
172039333	LTEMIAQEILSLPNVNHVR	ref|NC_010546.1|:c4560970-4560515_dihydroneopterin_aldolase_[Cyanothece_sp._ATCC_51142	si_0363x0.5xCofactors,_Vitamins,_Prosthetic_Groups,_PigmentsxFolate_and_pterinesxFolate_Biosynthesis
172039333	MDFIEVSGIR	ref|NC_010546.1|:c4560970-4560515_dihydroneopterin_aldolase_[Cyanothece_sp._ATCC_51142	si_0363x0.5xCofactors,_Vitamins,_Prosthetic_Groups,_PigmentsxFolate_and_pterinesxFolate_Biosynthesis
172039331	ELDTDEAALK	ref|NC_010546.1|:c4559898-4559290_hypothetical_protein_cce_4418_[Cyanothece_sp._ATCC_51142	si_0962x1xNo_Function_MatchxNo_Function_MatchxNone
172039331	GYTEVEAAK	ref|NC_010546.1|:c4559898-4559290_hypothetical_protein_cce_4418_[Cyanothece_sp._ATCC_51142	si_0962x1xNo_Function_MatchxNo_Function_MatchxNone
172039331	QQSKVIDAPFAPPWNRE	ref|NC_010546.1|:c4559898-4559290_hypothetical_protein_cce_4418_[Cyanothece_sp._ATCC_51142	si_0962x1xNo_Function_MatchxNo_Function_MatchxNone
172039331	SILNFTELIR	ref|NC_010546.1|:c4559898-4559290_hypothetical_protein_cce_4418_[Cyanothece_sp._ATCC_51142	si_0962x1xNo_Function_MatchxNo_Function_MatchxNone
172039325	AFPSVLDVDHPEFYPR	ref|NC_010546.1|:4551335-4552414_magnesium-protoporphyrin_IX_monomethyl_ester_cyclase_[Cyanothece_sp._ATCC_51142	si_0389x1xCofactors,_Vitamins,_Prosthetic_Groups,_PigmentsxTetrapyrrolesxChlorophyll_Biosynthesis
172039325	APSQETLLTPR	ref|NC_010546.1|:4551335-4552414_magnesium-protoporphyrin_IX_monomethyl_ester_cyclase_[Cyanothece_sp._ATCC_51142	si_0389x1xCofactors,_Vitamins,_Prosthetic_Groups,_PigmentsxTetrapyrrolesxChlorophyll_Biosynthesis
172039325	IYLIKPIDAEALR	ref|NC_010546.1|:4551335-4552414_magnesium-protoporphyrin_IX_monomethyl_ester_cyclase_[Cyanothece_sp._ATCC_51142	si_0389x1xCofactors,_Vitamins,_Prosthetic_Groups,_PigmentsxTetrapyrrolesxChlorophyll_Biosynthesis
172039325	TGNWDHLDETTR	ref|NC_010546.1|:4551335-4552414_magnesium-protoporphyrin_IX_monomethyl_ester_cyclase_[Cyanothece_sp._ATCC_51142	si_0389x1xCofactors,_Vitamins,_Prosthetic_Groups,_PigmentsxTetrapyrrolesxChlorophyll_Biosynthesis
172039317	ESTYVPMNTR	ref|NC_010546.1|:c4545641-4545273_mannose-6-phosphate_isomerase_[Cyanothece_sp._ATCC_51142	si_0116x0.5xCarbohydratesxMonosaccharidesxMannose_Metabolism
172039317	SEHWIVVSGTAR	ref|NC_010546.1|:c4545641-4545273_mannose-6-phosphate_isomerase_[Cyanothece_sp._ATCC_51142	si_0116x0.5xCarbohydratesxMonosaccharidesxMannose_Metabolism
172039317	STQKDSHPSEFTR	ref|NC_010546.1|:c4545641-4545273_mannose-6-phosphate_isomerase_[Cyanothece_sp._ATCC_51142	si_0116x0.5xCarbohydratesxMonosaccharidesxMannose_Metabolism
172039317	VIFDGEEHLLK	ref|NC_010546.1|:c4545641-4545273_mannose-6-phosphate_isomerase_[Cyanothece_sp._ATCC_51142	si_0116x0.5xCarbohydratesxMonosaccharidesxMannose_Metabolism
172039317	VIFDGEEHLLKQK	ref|NC_010546.1|:c4545641-4545273_mannose-6-phosphate_isomerase_[Cyanothece_sp._ATCC_51142	si_0116x0.5xCarbohydratesxMonosaccharidesxMannose_Metabolism
172039317	VTMLEEGPR	ref|NC_010546.1|:c4545641-4545273_mannose-6-phosphate_isomerase_[Cyanothece_sp._ATCC_51142	si_0116x0.5xCarbohydratesxMonosaccharidesxMannose_Metabolism
172039314	EAIIITQLPYQTNK	ref|NC_010546.1|:c4543594-4541006_DNA_gyrase_subunit_A_[Cyanothece_sp._ATCC_51142	si_0419x0.2xDNA_MetabolismxDNA_replicationxDNA_topoisomerases,_Type_II,_ATP-dependent
172039314	ERIEAIIEDELTQIK	ref|NC_010546.1|:c4543594-4541006_DNA_gyrase_subunit_A_[Cyanothece_sp._ATCC_51142	si_0419x0.2xDNA_MetabolismxDNA_replicationxDNA_topoisomerases,_Type_II,_ATP-dependent
172039314	ERIEAIIEDELTQIKTIHATPR	ref|NC_010546.1|:c4543594-4541006_DNA_gyrase_subunit_A_[Cyanothece_sp._ATCC_51142	si_0419x0.2xDNA_MetabolismxDNA_replicationxDNA_topoisomerases,_Type_II,_ATP-dependent
172039314	GRPDREAIIITQLPYQTNK	ref|NC_010546.1|:c4543594-4541006_DNA_gyrase_subunit_A_[Cyanothece_sp._ATCC_51142	si_0419x0.2xDNA_MetabolismxDNA_replicationxDNA_topoisomerases,_Type_II,_ATP-dependent
172039314	GVAQIETIEQR	ref|NC_010546.1|:c4543594-4541006_DNA_gyrase_subunit_A_[Cyanothece_sp._ATCC_51142	si_0419x0.2xDNA_MetabolismxDNA_replicationxDNA_topoisomerases,_Type_II,_ATP-dependent
172039314	GVVYAVNAYQIPSSSR	ref|NC_010546.1|:c4543594-4541006_DNA_gyrase_subunit_A_[Cyanothece_sp._ATCC_51142	si_0419x0.2xDNA_MetabolismxDNA_replicationxDNA_topoisomerases,_Type_II,_ATP-dependent
172039314	IADLKDILAR	ref|NC_010546.1|:c4543594-4541006_DNA_gyrase_subunit_A_[Cyanothece_sp._ATCC_51142	si_0419x0.2xDNA_MetabolismxDNA_replicationxDNA_topoisomerases,_Type_II,_ATP-dependent
172039314	IADLKDILARR	ref|NC_010546.1|:c4543594-4541006_DNA_gyrase_subunit_A_[Cyanothece_sp._ATCC_51142	si_0419x0.2xDNA_MetabolismxDNA_replicationxDNA_topoisomerases,_Type_II,_ATP-dependent
172039314	IADLVNEKR	ref|NC_010546.1|:c4543594-4541006_DNA_gyrase_subunit_A_[Cyanothece_sp._ATCC_51142	si_0419x0.2xDNA_MetabolismxDNA_replicationxDNA_topoisomerases,_Type_II,_ATP-dependent
172039314	IEAIIEDELTQIK	ref|NC_010546.1|:c4543594-4541006_DNA_gyrase_subunit_A_[Cyanothece_sp._ATCC_51142	si_0419x0.2xDNA_MetabolismxDNA_replicationxDNA_topoisomerases,_Type_II,_ATP-dependent
172039314	IIPGPDFPTGGQILGR	ref|NC_010546.1|:c4543594-4541006_DNA_gyrase_subunit_A_[Cyanothece_sp._ATCC_51142	si_0419x0.2xDNA_MetabolismxDNA_replicationxDNA_topoisomerases,_Type_II,_ATP-dependent
172039314	IIPTDLSNEMSR	ref|NC_010546.1|:c4543594-4541006_DNA_gyrase_subunit_A_[Cyanothece_sp._ATCC_51142	si_0419x0.2xDNA_MetabolismxDNA_replicationxDNA_topoisomerases,_Type_II,_ATP-dependent
172039314	ILYAMYELGLTPDRPFRK	ref|NC_010546.1|:c4543594-4541006_DNA_gyrase_subunit_A_[Cyanothece_sp._ATCC_51142	si_0419x0.2xDNA_MetabolismxDNA_replicationxDNA_topoisomerases,_Type_II,_ATP-dependent
172039314	LQALSTNALLR	ref|NC_010546.1|:c4543594-4541006_DNA_gyrase_subunit_A_[Cyanothece_sp._ATCC_51142	si_0419x0.2xDNA_MetabolismxDNA_replicationxDNA_topoisomerases,_Type_II,_ATP-dependent
172039314	LQALSTNALLRDIEADTVDFADNFDGSQQEPIVLPAR	ref|NC_010546.1|:c4543594-4541006_DNA_gyrase_subunit_A_[Cyanothece_sp._ATCC_51142	si_0419x0.2xDNA_MetabolismxDNA_replicationxDNA_topoisomerases,_Type_II,_ATP-dependent
172039314	LTALEAEKIHAEHEELQLK	ref|NC_010546.1|:c4543594-4541006_DNA_gyrase_subunit_A_[Cyanothece_sp._ATCC_51142	si_0419x0.2xDNA_MetabolismxDNA_replicationxDNA_topoisomerases,_Type_II,_ATP-dependent
172039314	LTREEDSIILGTR	ref|NC_010546.1|:c4543594-4541006_DNA_gyrase_subunit_A_[Cyanothece_sp._ATCC_51142	si_0419x0.2xDNA_MetabolismxDNA_replicationxDNA_topoisomerases,_Type_II,_ATP-dependent
172039314	LTREEDSIILGTRK	ref|NC_010546.1|:c4543594-4541006_DNA_gyrase_subunit_A_[Cyanothece_sp._ATCC_51142	si_0419x0.2xDNA_MetabolismxDNA_replicationxDNA_topoisomerases,_Type_II,_ATP-dependent
172039314	MAQDFSMR	ref|NC_010546.1|:c4543594-4541006_DNA_gyrase_subunit_A_[Cyanothece_sp._ATCC_51142	si_0419x0.2xDNA_MetabolismxDNA_replicationxDNA_topoisomerases,_Type_II,_ATP-dependent
172039314	MPVSTFEAQQR	ref|NC_010546.1|:c4543594-4541006_DNA_gyrase_subunit_A_[Cyanothece_sp._ATCC_51142	si_0419x0.2xDNA_MetabolismxDNA_replicationxDNA_topoisomerases,_Type_II,_ATP-dependent
172039314	QAVDAISMQSR	ref|NC_010546.1|:c4543594-4541006_DNA_gyrase_subunit_A_[Cyanothece_sp._ATCC_51142	si_0419x0.2xDNA_MetabolismxDNA_replicationxDNA_topoisomerases,_Type_II,_ATP-dependent
172039314	RMPVSTFEAQQR	ref|NC_010546.1|:c4543594-4541006_DNA_gyrase_subunit_A_[Cyanothece_sp._ATCC_51142	si_0419x0.2xDNA_MetabolismxDNA_replicationxDNA_topoisomerases,_Type_II,_ATP-dependent
172039314	RTEIVHDDGEIVDTDLIANEQAIILLTEQGYIKR	ref|NC_010546.1|:c4543594-4541006_DNA_gyrase_subunit_A_[Cyanothece_sp._ATCC_51142	si_0419x0.2xDNA_MetabolismxDNA_replicationxDNA_topoisomerases,_Type_II,_ATP-dependent
172039314	SGIHDAYMTGR	ref|NC_010546.1|:c4543594-4541006_DNA_gyrase_subunit_A_[Cyanothece_sp._ATCC_51142	si_0419x0.2xDNA_MetabolismxDNA_replicationxDNA_topoisomerases,_Type_II,_ATP-dependent
172039314	SPLIEGHGNFGSVDNDPPAAMR	ref|NC_010546.1|:c4543594-4541006_DNA_gyrase_subunit_A_[Cyanothece_sp._ATCC_51142	si_0419x0.2xDNA_MetabolismxDNA_replicationxDNA_topoisomerases,_Type_II,_ATP-dependent
172039314	TALSAFSNIR	ref|NC_010546.1|:c4543594-4541006_DNA_gyrase_subunit_A_[Cyanothece_sp._ATCC_51142	si_0419x0.2xDNA_MetabolismxDNA_replicationxDNA_topoisomerases,_Type_II,_ATP-dependent
172039314	TNGLIAISLGDGDQLR	ref|NC_010546.1|:c4543594-4541006_DNA_gyrase_subunit_A_[Cyanothece_sp._ATCC_51142	si_0419x0.2xDNA_MetabolismxDNA_replicationxDNA_topoisomerases,_Type_II,_ATP-dependent
172039314	VVGEVLGKYHPHGDTAVYDALVR	ref|NC_010546.1|:c4543594-4541006_DNA_gyrase_subunit_A_[Cyanothece_sp._ATCC_51142	si_0419x0.2xDNA_MetabolismxDNA_replicationxDNA_topoisomerases,_Type_II,_ATP-dependent
172039313	EMLAPTSAIIGAGLGDSVGLITDGR	ref|NC_010546.1|:c4540773-4539088_dihydroxy-acid_dehydratase_[Cyanothece_sp._ATCC_51142	si_0023x0.3xAmino_Acids_and_DerivativesxBranched-chain_amino_acidsxBranched-Chain_Amino_Acid_Biosynthesis
172039313	GNLASEGAVAK	ref|NC_010546.1|:c4540773-4539088_dihydroxy-acid_dehydratase_[Cyanothece_sp._ATCC_51142	si_0023x0.3xAmino_Acids_and_DerivativesxBranched-chain_amino_acidsxBranched-Chain_Amino_Acid_Biosynthesis
172039313	IDDNTLLAIER	ref|NC_010546.1|:c4540773-4539088_dihydroxy-acid_dehydratase_[Cyanothece_sp._ATCC_51142	si_0023x0.3xAmino_Acids_and_DerivativesxBranched-chain_amino_acidsxBranched-Chain_Amino_Acid_Biosynthesis
172039313	INAGDVIIVR	ref|NC_010546.1|:c4540773-4539088_dihydroxy-acid_dehydratase_[Cyanothece_sp._ATCC_51142	si_0023x0.3xAmino_Acids_and_DerivativesxBranched-chain_amino_acidsxBranched-Chain_Amino_Acid_Biosynthesis
172039313	LLQVNVSEEELSQR	ref|NC_010546.1|:c4540773-4539088_dihydroxy-acid_dehydratase_[Cyanothece_sp._ATCC_51142	si_0023x0.3xAmino_Acids_and_DerivativesxBranched-chain_amino_acidsxBranched-Chain_Amino_Acid_Biosynthesis
172039313	LLQVNVSEEELSQRR	ref|NC_010546.1|:c4540773-4539088_dihydroxy-acid_dehydratase_[Cyanothece_sp._ATCC_51142	si_0023x0.3xAmino_Acids_and_DerivativesxBranched-chain_amino_acidsxBranched-Chain_Amino_Acid_Biosynthesis
172039313	MLLNHGLLHGDALTISGQTIAEILADVPDEPPANQDVIR	ref|NC_010546.1|:c4540773-4539088_dihydroxy-acid_dehydratase_[Cyanothece_sp._ATCC_51142	si_0023x0.3xAmino_Acids_and_DerivativesxBranched-chain_amino_acidsxBranched-Chain_Amino_Acid_Biosynthesis
172039313	NPQITGPAR	ref|NC_010546.1|:c4540773-4539088_dihydroxy-acid_dehydratase_[Cyanothece_sp._ATCC_51142	si_0023x0.3xAmino_Acids_and_DerivativesxBranched-chain_amino_acidsxBranched-Chain_Amino_Acid_Biosynthesis
172039313	SAFVLVNAIR	ref|NC_010546.1|:c4540773-4539088_dihydroxy-acid_dehydratase_[Cyanothece_sp._ATCC_51142	si_0023x0.3xAmino_Acids_and_DerivativesxBranched-chain_amino_acidsxBranched-Chain_Amino_Acid_Biosynthesis
172039313	SWDNPVYKEGHLAILK	ref|NC_010546.1|:c4540773-4539088_dihydroxy-acid_dehydratase_[Cyanothece_sp._ATCC_51142	si_0023x0.3xAmino_Acids_and_DerivativesxBranched-chain_amino_acidsxBranched-Chain_Amino_Acid_Biosynthesis
172039313	SWDNPVYKEGHLAILKGNLASEGAVAK	ref|NC_010546.1|:c4540773-4539088_dihydroxy-acid_dehydratase_[Cyanothece_sp._ATCC_51142	si_0023x0.3xAmino_Acids_and_DerivativesxBranched-chain_amino_acidsxBranched-Chain_Amino_Acid_Biosynthesis
172039313	YVTVNLHQAGGIPQVMK	ref|NC_010546.1|:c4540773-4539088_dihydroxy-acid_dehydratase_[Cyanothece_sp._ATCC_51142	si_0023x0.3xAmino_Acids_and_DerivativesxBranched-chain_amino_acidsxBranched-Chain_Amino_Acid_Biosynthesis
172039312	ALSQVEIPK	ref|NC_010546.1|:c4538839-4537724_oxidoreductase_[Cyanothece_sp._ATCC_51142	si_0962x1xNo_Function_MatchxNo_Function_MatchxNone
172039312	ALSQVEIPKR	ref|NC_010546.1|:c4538839-4537724_oxidoreductase_[Cyanothece_sp._ATCC_51142	si_0962x1xNo_Function_MatchxNo_Function_MatchxNone
172039312	GTLILGSDNLKDYVHGFHLQEAQAGK	ref|NC_010546.1|:c4538839-4537724_oxidoreductase_[Cyanothece_sp._ATCC_51142	si_0962x1xNo_Function_MatchxNo_Function_MatchxNone
172039312	HLLLEKPMAMSAQETR	ref|NC_010546.1|:c4538839-4537724_oxidoreductase_[Cyanothece_sp._ATCC_51142	si_0962x1xNo_Function_MatchxNo_Function_MatchxNone
172039312	IVDRWVASIDQK	ref|NC_010546.1|:c4538839-4537724_oxidoreductase_[Cyanothece_sp._ATCC_51142	si_0962x1xNo_Function_MatchxNo_Function_MatchxNone
172039312	LAEKLQEGYIGQPR	ref|NC_010546.1|:c4538839-4537724_oxidoreductase_[Cyanothece_sp._ATCC_51142	si_0962x1xNo_Function_MatchxNo_Function_MatchxNone
172039312	LAFPQVFTDGR	ref|NC_010546.1|:c4538839-4537724_oxidoreductase_[Cyanothece_sp._ATCC_51142	si_0962x1xNo_Function_MatchxNo_Function_MatchxNone
172039312	LIKIDWLVASR	ref|NC_010546.1|:c4538839-4537724_oxidoreductase_[Cyanothece_sp._ATCC_51142	si_0962x1xNo_Function_MatchxNo_Function_MatchxNone
172039312	LLAMSDIDAVTLSTPPFLHYDMGK	ref|NC_010546.1|:c4538839-4537724_oxidoreductase_[Cyanothece_sp._ATCC_51142	si_0962x1xNo_Function_MatchxNo_Function_MatchxNone
172039312	LQEGYIGQPR	ref|NC_010546.1|:c4538839-4537724_oxidoreductase_[Cyanothece_sp._ATCC_51142	si_0962x1xNo_Function_MatchxNo_Function_MatchxNone
172039312	QILEAGKHLLLEKPMAMSAQETR	ref|NC_010546.1|:c4538839-4537724_oxidoreductase_[Cyanothece_sp._ATCC_51142	si_0962x1xNo_Function_MatchxNo_Function_MatchxNone
172039312	RLAFPQVFTDGR	ref|NC_010546.1|:c4538839-4537724_oxidoreductase_[Cyanothece_sp._ATCC_51142	si_0962x1xNo_Function_MatchxNo_Function_MatchxNone
172039312	TELVAVYNRDLGK	ref|NC_010546.1|:c4538839-4537724_oxidoreductase_[Cyanothece_sp._ATCC_51142	si_0962x1xNo_Function_MatchxNo_Function_MatchxNone
172039312	VAVVGTGFGQAIHIP	ref|NC_010546.1|:c4538839-4537724_oxidoreductase_[Cyanothece_sp._ATCC_51142	si_0962x1xNo_Function_MatchxNo_Function_MatchxNone
172039311	DGDLVEVAPGYAR	ref|NC_010546.1|:4537225-4537683_50S_ribosomal_protein_L9_[Cyanothece_sp._ATCC_51142	si_0227x0.5xClustering-based_subsystemsxClustering-based_subsystemsxCBSS-262719.3.peg.410
172039311	EVGEGEAIFGTVTTSEVAEAIQAATNQEVDR	ref|NC_010546.1|:4537225-4537683_50S_ribosomal_protein_L9_[Cyanothece_sp._ATCC_51142	si_0227x0.5xClustering-based_subsystemsxClustering-based_subsystemsxCBSS-262719.3.peg.410
172039311	EVGEGEAIFGTVTTSEVAEAIQAATNQEVDRK	ref|NC_010546.1|:4537225-4537683_50S_ribosomal_protein_L9_[Cyanothece_sp._ATCC_51142	si_0227x0.5xClustering-based_subsystemsxClustering-based_subsystemsxCBSS-262719.3.peg.410
172039311	FTIRKEVGEGEAIFGTVTTSEVAEAIQAATNQEVDRK	ref|NC_010546.1|:4537225-4537683_50S_ribosomal_protein_L9_[Cyanothece_sp._ATCC_51142	si_0227x0.5xClustering-based_subsystemsxClustering-based_subsystemsxCBSS-262719.3.peg.410
172039311	GITVPDINK	ref|NC_010546.1|:4537225-4537683_50S_ribosomal_protein_L9_[Cyanothece_sp._ATCC_51142	si_0227x0.5xClustering-based_subsystemsxClustering-based_subsystemsxCBSS-262719.3.peg.410
172039311	GITVPDINKTGFYEATVK	ref|NC_010546.1|:4537225-4537683_50S_ribosomal_protein_L9_[Cyanothece_sp._ATCC_51142	si_0227x0.5xClustering-based_subsystemsxClustering-based_subsystemsxCBSS-262719.3.peg.410
172039311	KEVGEGEAIFGTVTTSEVAEAIQAATNQEVDR	ref|NC_010546.1|:4537225-4537683_50S_ribosomal_protein_L9_[Cyanothece_sp._ATCC_51142	si_0227x0.5xClustering-based_subsystemsxClustering-based_subsystemsxCBSS-262719.3.peg.410
172039311	KEVGEGEAIFGTVTTSEVAEAIQAATNQEVDRK	ref|NC_010546.1|:4537225-4537683_50S_ribosomal_protein_L9_[Cyanothece_sp._ATCC_51142	si_0227x0.5xClustering-based_subsystemsxClustering-based_subsystemsxCBSS-262719.3.peg.410
172039311	KGITVPDINK	ref|NC_010546.1|:4537225-4537683_50S_ribosomal_protein_L9_[Cyanothece_sp._ATCC_51142	si_0227x0.5xClustering-based_subsystemsxClustering-based_subsystemsxCBSS-262719.3.peg.410
172039311	KGITVPDINKTGFYEATVK	ref|NC_010546.1|:4537225-4537683_50S_ribosomal_protein_L9_[Cyanothece_sp._ATCC_51142	si_0227x0.5xClustering-based_subsystemsxClustering-based_subsystemsxCBSS-262719.3.peg.410
172039311	LATLATPGILK	ref|NC_010546.1|:4537225-4537683_50S_ribosomal_protein_L9_[Cyanothece_sp._ATCC_51142	si_0227x0.5xClustering-based_subsystemsxClustering-based_subsystemsxCBSS-262719.3.peg.410
172039311	LGKDGDLVEVAPGYAR	ref|NC_010546.1|:4537225-4537683_50S_ribosomal_protein_L9_[Cyanothece_sp._ATCC_51142	si_0227x0.5xClustering-based_subsystemsxClustering-based_subsystemsxCBSS-262719.3.peg.410
172039311	LLAEKQQAEGQK	ref|NC_010546.1|:4537225-4537683_50S_ribosomal_protein_L9_[Cyanothece_sp._ATCC_51142	si_0227x0.5xClustering-based_subsystemsxClustering-based_subsystemsxCBSS-262719.3.peg.410
172039311	LLAEKQQAEGQKTALETIK	ref|NC_010546.1|:4537225-4537683_50S_ribosomal_protein_L9_[Cyanothece_sp._ATCC_51142	si_0227x0.5xClustering-based_subsystemsxClustering-based_subsystemsxCBSS-262719.3.peg.410
172039311	NYLLPQKLATLATPGILK	ref|NC_010546.1|:4537225-4537683_50S_ribosomal_protein_L9_[Cyanothece_sp._ATCC_51142	si_0227x0.5xClustering-based_subsystemsxClustering-based_subsystemsxCBSS-262719.3.peg.410
172039311	QQAEGQKTALETIKR	ref|NC_010546.1|:4537225-4537683_50S_ribosomal_protein_L9_[Cyanothece_sp._ATCC_51142	si_0227x0.5xClustering-based_subsystemsxClustering-based_subsystemsxCBSS-262719.3.peg.410
172039311	RVQVVLNESINKLGKDGDLVEVAPGYAR	ref|NC_010546.1|:4537225-4537683_50S_ribosomal_protein_L9_[Cyanothece_sp._ATCC_51142	si_0227x0.5xClustering-based_subsystemsxClustering-based_subsystemsxCBSS-262719.3.peg.410
172039311	TGFYEATVK	ref|NC_010546.1|:4537225-4537683_50S_ribosomal_protein_L9_[Cyanothece_sp._ATCC_51142	si_0227x0.5xClustering-based_subsystemsxClustering-based_subsystemsxCBSS-262719.3.peg.410
172039311	VQVVLNESINK	ref|NC_010546.1|:4537225-4537683_50S_ribosomal_protein_L9_[Cyanothece_sp._ATCC_51142	si_0227x0.5xClustering-based_subsystemsxClustering-based_subsystemsxCBSS-262719.3.peg.410
172039311	VQVVLNESINKLGK	ref|NC_010546.1|:4537225-4537683_50S_ribosomal_protein_L9_[Cyanothece_sp._ATCC_51142	si_0227x0.5xClustering-based_subsystemsxClustering-based_subsystemsxCBSS-262719.3.peg.410
172039311	VQVVLNESINKLGKDGDLVEVAPGYAR	ref|NC_010546.1|:4537225-4537683_50S_ribosomal_protein_L9_[Cyanothece_sp._ATCC_51142	si_0227x0.5xClustering-based_subsystemsxClustering-based_subsystemsxCBSS-262719.3.peg.410
172039310	AILYEVDLRPTSERR	ref|NC_010546.1|:4536322-4537044_rfrA_pentapeptide_repeat-containing_protein_[Cyanothece_sp._ATCC_51142	si_0962x1xNo_Function_MatchxNo_Function_MatchxNone
172039310	AKLTQEPYR	ref|NC_010546.1|:4536322-4537044_rfrA_pentapeptide_repeat-containing_protein_[Cyanothece_sp._ATCC_51142	si_0962x1xNo_Function_MatchxNo_Function_MatchxNone
172039310	EADLIDLNLSGVDFQGADLR	ref|NC_010546.1|:4536322-4537044_rfrA_pentapeptide_repeat-containing_protein_[Cyanothece_sp._ATCC_51142	si_0962x1xNo_Function_MatchxNo_Function_MatchxNone
172039310	LIDANLTDAYLSK	ref|NC_010546.1|:4536322-4537044_rfrA_pentapeptide_repeat-containing_protein_[Cyanothece_sp._ATCC_51142	si_0962x1xNo_Function_MatchxNo_Function_MatchxNone
172039310	MELEELLSKYHLGER	ref|NC_010546.1|:4536322-4537044_rfrA_pentapeptide_repeat-containing_protein_[Cyanothece_sp._ATCC_51142	si_0962x1xNo_Function_MatchxNo_Function_MatchxNone
172039308	AQAENRPFQNPVEPR	ref|NC_010546.1|:4534597-4535646_putative_Rieske_2Fe-2S_family_protein_[Cyanothece_sp._ATCC_51142	si_0962x1xNo_Function_MatchxNo_Function_MatchxNone
172039308	EIPSLTEYDDLDISR	ref|NC_010546.1|:4534597-4535646_putative_Rieske_2Fe-2S_family_protein_[Cyanothece_sp._ATCC_51142	si_0962x1xNo_Function_MatchxNo_Function_MatchxNone
172039308	HEDGEVFAMR	ref|NC_010546.1|:4534597-4535646_putative_Rieske_2Fe-2S_family_protein_[Cyanothece_sp._ATCC_51142	si_0962x1xNo_Function_MatchxNo_Function_MatchxNone
172039308	VSIEIVFELPSVR	ref|NC_010546.1|:4534597-4535646_putative_Rieske_2Fe-2S_family_protein_[Cyanothece_sp._ATCC_51142	si_0962x1xNo_Function_MatchxNo_Function_MatchxNone
172039307	ANNVELLLIR	ref|NC_010546.1|:c4534409-4533537_hypothetical_protein_cce_4394_[Cyanothece_sp._ATCC_51142
172039307	EFTNLEEFSIK	ref|NC_010546.1|:c4534409-4533537_hypothetical_protein_cce_4394_[Cyanothece_sp._ATCC_51142
172039307	LIQEMSQPEFILVHQMGK	ref|NC_010546.1|:c4534409-4533537_hypothetical_protein_cce_4394_[Cyanothece_sp._ATCC_51142
172039307	LITEWYLYQEILK	ref|NC_010546.1|:c4534409-4533537_hypothetical_protein_cce_4394_[Cyanothece_sp._ATCC_51142
172039307	MNIINQLFTSNLK	ref|NC_010546.1|:c4534409-4533537_hypothetical_protein_cce_4394_[Cyanothece_sp._ATCC_51142
172039307	NIINQLFTSNLK	ref|NC_010546.1|:c4534409-4533537_hypothetical_protein_cce_4394_[Cyanothece_sp._ATCC_51142
172039307	NVSDFFENLK	ref|NC_010546.1|:c4534409-4533537_hypothetical_protein_cce_4394_[Cyanothece_sp._ATCC_51142
172039307	SVDELIDEFIK	ref|NC_010546.1|:c4534409-4533537_hypothetical_protein_cce_4394_[Cyanothece_sp._ATCC_51142
172039307	TENINDKIEESMKEFTNLEEFSIK	ref|NC_010546.1|:c4534409-4533537_hypothetical_protein_cce_4394_[Cyanothece_sp._ATCC_51142
172039303	MEMMAAIIGLEALK	ref|NC_010546.1|:c4530450-4529983_ribonuclease_H_[Cyanothece_sp._ATCC_51142	si_0236x0.3xClustering-based_subsystemsxDNA_polymerase_III_epsilon_clusterxCBSS-342610.3.peg.1536
172039302	IIETAIKQWLNGER	ref|NC_010546.1|:c4529917-4529666_hypothetical_protein_cce_4389_[Cyanothece_sp._ATCC_51142	si_0962x1xNo_Function_MatchxNo_Function_MatchxNone
172039297	IKQASYDLQDGDEIVFGPQVFAMYQYR	ref|NC_010546.1|:c4524615-4524160_hypothetical_protein_cce_4384_[Cyanothece_sp._ATCC_51142	si_0962x1xNo_Function_MatchxNo_Function_MatchxNone
172039297	IREDGSSYYR	ref|NC_010546.1|:c4524615-4524160_hypothetical_protein_cce_4384_[Cyanothece_sp._ATCC_51142	si_0962x1xNo_Function_MatchxNo_Function_MatchxNone
172039297	IVDGDLEGKR	ref|NC_010546.1|:c4524615-4524160_hypothetical_protein_cce_4384_[Cyanothece_sp._ATCC_51142	si_0962x1xNo_Function_MatchxNo_Function_MatchxNone
172039292	AQQVQAGAQQLQQELEEMNIEGYSDEAK	ref|NC_010546.1|:4518729-4519082_CHP103-containing_protein_[Cyanothece_sp._ATCC_51142	si_0962x1xNo_Function_MatchxNo_Function_MatchxNone
172039292	AQQVQAGAQQLQQELEEMNIEGYSDEAKAVTVVMSGNQEPR	ref|NC_010546.1|:4518729-4519082_CHP103-containing_protein_[Cyanothece_sp._ATCC_51142	si_0962x1xNo_Function_MatchxNo_Function_MatchxNone
172039292	AVTVVMSGNQEPR	ref|NC_010546.1|:4518729-4519082_CHP103-containing_protein_[Cyanothece_sp._ATCC_51142	si_0962x1xNo_Function_MatchxNo_Function_MatchxNone
172039292	ERMEALTSGLNLPGM	ref|NC_010546.1|:4518729-4519082_CHP103-containing_protein_[Cyanothece_sp._ATCC_51142	si_0962x1xNo_Function_MatchxNo_Function_MatchxNone
172039292	GFGFGLGK	ref|NC_010546.1|:4518729-4519082_CHP103-containing_protein_[Cyanothece_sp._ATCC_51142	si_0962x1xNo_Function_MatchxNo_Function_MatchxNone
172039292	GKGFGFGLGK	ref|NC_010546.1|:4518729-4519082_CHP103-containing_protein_[Cyanothece_sp._ATCC_51142	si_0962x1xNo_Function_MatchxNo_Function_MatchxNone
172039292	IKELQEAFQK	ref|NC_010546.1|:4518729-4519082_CHP103-containing_protein_[Cyanothece_sp._ATCC_51142	si_0962x1xNo_Function_MatchxNo_Function_MatchxNone
172039292	IKELQEAFQKAQQVQAGAQQLQQELEEMNIEGYSDEAK	ref|NC_010546.1|:4518729-4519082_CHP103-containing_protein_[Cyanothece_sp._ATCC_51142	si_0962x1xNo_Function_MatchxNo_Function_MatchxNone
172039292	QVTISPDAMGNSPEALSELVTAAMK	ref|NC_010546.1|:4518729-4519082_CHP103-containing_protein_[Cyanothece_sp._ATCC_51142	si_0962x1xNo_Function_MatchxNo_Function_MatchxNone
172039292	QVTISPDAMGNSPEALSELVTAAMKDAYAK	ref|NC_010546.1|:4518729-4519082_CHP103-containing_protein_[Cyanothece_sp._ATCC_51142	si_0962x1xNo_Function_MatchxNo_Function_MatchxNone
172039291	HYPDRQFDVETMSTQGDKILDVALAK	ref|NC_010546.1|:4517580-4518575_porphobilinogen_deaminase_[Cyanothece_sp._ATCC_51142	si_0393x1xCofactors,_Vitamins,_Prosthetic_Groups,_PigmentsxTetrapyrrolesxHeme_and_Siroheme_Biosynthesis
172039291	IENNILTLTGMVASLDGK	ref|NC_010546.1|:4517580-4518575_porphobilinogen_deaminase_[Cyanothece_sp._ATCC_51142	si_0393x1xCofactors,_Vitamins,_Prosthetic_Groups,_PigmentsxTetrapyrrolesxHeme_and_Siroheme_Biosynthesis
172039291	IGDKGLFTK	ref|NC_010546.1|:4517580-4518575_porphobilinogen_deaminase_[Cyanothece_sp._ATCC_51142	si_0393x1xCofactors,_Vitamins,_Prosthetic_Groups,_PigmentsxTetrapyrrolesxHeme_and_Siroheme_Biosynthesis
172039291	KSQLALVQTYWIQEELQK	ref|NC_010546.1|:4517580-4518575_porphobilinogen_deaminase_[Cyanothece_sp._ATCC_51142	si_0393x1xCofactors,_Vitamins,_Prosthetic_Groups,_PigmentsxTetrapyrrolesxHeme_and_Siroheme_Biosynthesis
172039291	LDAGEYDAIILAVAGLQR	ref|NC_010546.1|:4517580-4518575_porphobilinogen_deaminase_[Cyanothece_sp._ATCC_51142	si_0393x1xCofactors,_Vitamins,_Prosthetic_Groups,_PigmentsxTetrapyrrolesxHeme_and_Siroheme_Biosynthesis
172039291	LRDEGATEILAEIFAQIQR	ref|NC_010546.1|:4517580-4518575_porphobilinogen_deaminase_[Cyanothece_sp._ATCC_51142	si_0393x1xCofactors,_Vitamins,_Prosthetic_Groups,_PigmentsxTetrapyrrolesxHeme_and_Siroheme_Biosynthesis
172039291	LSKLDAGEYDAIILAVAGLQR	ref|NC_010546.1|:4517580-4518575_porphobilinogen_deaminase_[Cyanothece_sp._ATCC_51142	si_0393x1xCofactors,_Vitamins,_Prosthetic_Groups,_PigmentsxTetrapyrrolesxHeme_and_Siroheme_Biosynthesis
172039291	SGDPEILDLLK	ref|NC_010546.1|:4517580-4518575_porphobilinogen_deaminase_[Cyanothece_sp._ATCC_51142	si_0393x1xCofactors,_Vitamins,_Prosthetic_Groups,_PigmentsxTetrapyrrolesxHeme_and_Siroheme_Biosynthesis
172039291	SGDPEILDLLKVLEHTETR	ref|NC_010546.1|:4517580-4518575_porphobilinogen_deaminase_[Cyanothece_sp._ATCC_51142	si_0393x1xCofactors,_Vitamins,_Prosthetic_Groups,_PigmentsxTetrapyrrolesxHeme_and_Siroheme_Biosynthesis
172039291	TLIKDTIQGEAAQAEK	ref|NC_010546.1|:4517580-4518575_porphobilinogen_deaminase_[Cyanothece_sp._ATCC_51142	si_0393x1xCofactors,_Vitamins,_Prosthetic_Groups,_PigmentsxTetrapyrrolesxHeme_and_Siroheme_Biosynthesis
172039291	TLIKDTIQGEAAQAEKLGEELALR	ref|NC_010546.1|:4517580-4518575_porphobilinogen_deaminase_[Cyanothece_sp._ATCC_51142	si_0393x1xCofactors,_Vitamins,_Prosthetic_Groups,_PigmentsxTetrapyrrolesxHeme_and_Siroheme_Biosynthesis
172039291	VLEHTETR	ref|NC_010546.1|:4517580-4518575_porphobilinogen_deaminase_[Cyanothece_sp._ATCC_51142	si_0393x1xCofactors,_Vitamins,_Prosthetic_Groups,_PigmentsxTetrapyrrolesxHeme_and_Siroheme_Biosynthesis
172039291	VLEHTETRDR	ref|NC_010546.1|:4517580-4518575_porphobilinogen_deaminase_[Cyanothece_sp._ATCC_51142	si_0393x1xCofactors,_Vitamins,_Prosthetic_Groups,_PigmentsxTetrapyrrolesxHeme_and_Siroheme_Biosynthesis
172039291	VNPADALVVNETHQDKQLDTLPEGSVIGTSSLRR	ref|NC_010546.1|:4517580-4518575_porphobilinogen_deaminase_[Cyanothece_sp._ATCC_51142	si_0393x1xCofactors,_Vitamins,_Prosthetic_Groups,_PigmentsxTetrapyrrolesxHeme_and_Siroheme_Biosynthesis
172039283	AAEGFIYIWGLPTR	ref|NC_010546.1|:4511685-4512887_argininosuccinate_synthase_[Cyanothece_sp._ATCC_51142	si_0006x1xAmino_Acids_and_DerivativesxArginine;_urea_cycle,_polyaminesxArginine_Biosynthesis_extended
172039283	ADLGQGDELGPIQAK	ref|NC_010546.1|:4511685-4512887_argininosuccinate_synthase_[Cyanothece_sp._ATCC_51142	si_0006x1xAmino_Acids_and_DerivativesxArginine;_urea_cycle,_polyaminesxArginine_Biosynthesis_extended
172039283	ADLGQGDELGPIQAKA	ref|NC_010546.1|:4511685-4512887_argininosuccinate_synthase_[Cyanothece_sp._ATCC_51142	si_0006x1xAmino_Acids_and_DerivativesxArginine;_urea_cycle,_polyaminesxArginine_Biosynthesis_extended
172039283	AIADTPDTPEYVEIGFEK	ref|NC_010546.1|:4511685-4512887_argininosuccinate_synthase_[Cyanothece_sp._ATCC_51142	si_0006x1xAmino_Acids_and_DerivativesxArginine;_urea_cycle,_polyaminesxArginine_Biosynthesis_extended
172039283	AIKANALYESR	ref|NC_010546.1|:4511685-4512887_argininosuccinate_synthase_[Cyanothece_sp._ATCC_51142	si_0006x1xAmino_Acids_and_DerivativesxArginine;_urea_cycle,_polyaminesxArginine_Biosynthesis_extended
172039283	AIKANALYESRYPLSTALARP	ref|NC_010546.1|:4511685-4512887_argininosuccinate_synthase_[Cyanothece_sp._ATCC_51142	si_0006x1xAmino_Acids_and_DerivativesxArginine;_urea_cycle,_polyaminesxArginine_Biosynthesis_extended
172039283	ALKSGAVESLVEDATAEFVTDYA	ref|NC_010546.1|:4511685-4512887_argininosuccinate_synthase_[Cyanothece_sp._ATCC_51142	si_0006x1xAmino_Acids_and_DerivativesxArginine;_urea_cycle,_polyaminesxArginine_Biosynthesis_extended
172039283	ALKSGAVESLVEDATAEFVTDYAFK	ref|NC_010546.1|:4511685-4512887_argininosuccinate_synthase_[Cyanothece_sp._ATCC_51142	si_0006x1xAmino_Acids_and_DerivativesxArginine;_urea_cycle,_polyaminesxArginine_Biosynthesis_extended
172039283	ANALYESR	ref|NC_010546.1|:4511685-4512887_argininosuccinate_synthase_[Cyanothece_sp._ATCC_51142	si_0006x1xAmino_Acids_and_DerivativesxArginine;_urea_cycle,_polyaminesxArginine_Biosynthesis_extended
172039283	ANALYESRYPLSTALARP	ref|NC_010546.1|:4511685-4512887_argininosuccinate_synthase_[Cyanothece_sp._ATCC_51142	si_0006x1xAmino_Acids_and_DerivativesxArginine;_urea_cycle,_polyaminesxArginine_Biosynthesis_extended
172039283	ANALYESRYPLSTALARPLIAK	ref|NC_010546.1|:4511685-4512887_argininosuccinate_synthase_[Cyanothece_sp._ATCC_51142	si_0006x1xAmino_Acids_and_DerivativesxArginine;_urea_cycle,_polyaminesxArginine_Biosynthesis_extended
172039283	DLESLTLTSDVTHYK	ref|NC_010546.1|:4511685-4512887_argininosuccinate_synthase_[Cyanothece_sp._ATCC_51142	si_0006x1xAmino_Acids_and_DerivativesxArginine;_urea_cycle,_polyaminesxArginine_Biosynthesis_extended
172039283	DLESLTLTSDVTHYKK	ref|NC_010546.1|:4511685-4512887_argininosuccinate_synthase_[Cyanothece_sp._ATCC_51142	si_0006x1xAmino_Acids_and_DerivativesxArginine;_urea_cycle,_polyaminesxArginine_Biosynthesis_extended
172039283	DLGILALNPTLK	ref|NC_010546.1|:4511685-4512887_argininosuccinate_synthase_[Cyanothece_sp._ATCC_51142	si_0006x1xAmino_Acids_and_DerivativesxArginine;_urea_cycle,_polyaminesxArginine_Biosynthesis_extended
172039283	DLGQGDELGPIQAK	ref|NC_010546.1|:4511685-4512887_argininosuccinate_synthase_[Cyanothece_sp._ATCC_51142	si_0006x1xAmino_Acids_and_DerivativesxArginine;_urea_cycle,_polyaminesxArginine_Biosynthesis_extended
172039283	EIYEAPALLVLIDAHR	ref|NC_010546.1|:4511685-4512887_argininosuccinate_synthase_[Cyanothece_sp._ATCC_51142	si_0006x1xAmino_Acids_and_DerivativesxArginine;_urea_cycle,_polyaminesxArginine_Biosynthesis_extended
172039283	EIYEAPALLVLIDAHRDLESLTLTSDVTHYK	ref|NC_010546.1|:4511685-4512887_argininosuccinate_synthase_[Cyanothece_sp._ATCC_51142	si_0006x1xAmino_Acids_and_DerivativesxArginine;_urea_cycle,_polyaminesxArginine_Biosynthesis_extended
172039283	EIYEAPALLVLIDAHRDLESLTLTSDVTHYKK	ref|NC_010546.1|:4511685-4512887_argininosuccinate_synthase_[Cyanothece_sp._ATCC_51142	si_0006x1xAmino_Acids_and_DerivativesxArginine;_urea_cycle,_polyaminesxArginine_Biosynthesis_extended
172039283	EQTIAYGEK	ref|NC_010546.1|:4511685-4512887_argininosuccinate_synthase_[Cyanothece_sp._ATCC_51142	si_0006x1xAmino_Acids_and_DerivativesxArginine;_urea_cycle,_polyaminesxArginine_Biosynthesis_extended
172039283	EQTIAYGEKFGLDFPVKK	ref|NC_010546.1|:4511685-4512887_argininosuccinate_synthase_[Cyanothece_sp._ATCC_51142	si_0006x1xAmino_Acids_and_DerivativesxArginine;_urea_cycle,_polyaminesxArginine_Biosynthesis_extended
172039283	ESLDAFIDHTQER	ref|NC_010546.1|:4511685-4512887_argininosuccinate_synthase_[Cyanothece_sp._ATCC_51142	si_0006x1xAmino_Acids_and_DerivativesxArginine;_urea_cycle,_polyaminesxArginine_Biosynthesis_extended
172039283	FDLGILALNPTLK	ref|NC_010546.1|:4511685-4512887_argininosuccinate_synthase_[Cyanothece_sp._ATCC_51142	si_0006x1xAmino_Acids_and_DerivativesxArginine;_urea_cycle,_polyaminesxArginine_Biosynthesis_extended
172039283	FGLDFPVK	ref|NC_010546.1|:4511685-4512887_argininosuccinate_synthase_[Cyanothece_sp._ATCC_51142	si_0006x1xAmino_Acids_and_DerivativesxArginine;_urea_cycle,_polyaminesxArginine_Biosynthesis_extended
172039283	FGLDFPVKK	ref|NC_010546.1|:4511685-4512887_argininosuccinate_synthase_[Cyanothece_sp._ATCC_51142	si_0006x1xAmino_Acids_and_DerivativesxArginine;_urea_cycle,_polyaminesxArginine_Biosynthesis_extended
172039283	GAVESLVEDATAEFVTDYAFK	ref|NC_010546.1|:4511685-4512887_argininosuccinate_synthase_[Cyanothece_sp._ATCC_51142	si_0006x1xAmino_Acids_and_DerivativesxArginine;_urea_cycle,_polyaminesxArginine_Biosynthesis_extended
172039283	GLPVSLNGQTLDPVTLISQLNDVVGK	ref|NC_010546.1|:4511685-4512887_argininosuccinate_synthase_[Cyanothece_sp._ATCC_51142	si_0006x1xAmino_Acids_and_DerivativesxArginine;_urea_cycle,_polyaminesxArginine_Biosynthesis_extended
172039283	GLWYSPLKESLDAFIDHTQER	ref|NC_010546.1|:4511685-4512887_argininosuccinate_synthase_[Cyanothece_sp._ATCC_51142	si_0006x1xAmino_Acids_and_DerivativesxArginine;_urea_cycle,_polyaminesxArginine_Biosynthesis_extended
172039283	GLWYSPLKESLDAFIDHTQERVNGTVR	ref|NC_010546.1|:4511685-4512887_argininosuccinate_synthase_[Cyanothece_sp._ATCC_51142	si_0006x1xAmino_Acids_and_DerivativesxArginine;_urea_cycle,_polyaminesxArginine_Biosynthesis_extended
172039283	GNANIVGR	ref|NC_010546.1|:4511685-4512887_argininosuccinate_synthase_[Cyanothece_sp._ATCC_51142	si_0006x1xAmino_Acids_and_DerivativesxArginine;_urea_cycle,_polyaminesxArginine_Biosynthesis_extended
172039283	GNDQVRFDLGILALNPTLK	ref|NC_010546.1|:4511685-4512887_argininosuccinate_synthase_[Cyanothece_sp._ATCC_51142	si_0006x1xAmino_Acids_and_DerivativesxArginine;_urea_cycle,_polyaminesxArginine_Biosynthesis_extended
172039283	GVEETYSHLIYR	ref|NC_010546.1|:4511685-4512887_argininosuccinate_synthase_[Cyanothece_sp._ATCC_51142	si_0006x1xAmino_Acids_and_DerivativesxArginine;_urea_cycle,_polyaminesxArginine_Biosynthesis_extended
172039283	HEWGVDEVITLAADLGQGDELGPIQAK	ref|NC_010546.1|:4511685-4512887_argininosuccinate_synthase_[Cyanothece_sp._ATCC_51142	si_0006x1xAmino_Acids_and_DerivativesxArginine;_urea_cycle,_polyaminesxArginine_Biosynthesis_extended
172039283	KGVEETYSHLIYR	ref|NC_010546.1|:4511685-4512887_argininosuccinate_synthase_[Cyanothece_sp._ATCC_51142	si_0006x1xAmino_Acids_and_DerivativesxArginine;_urea_cycle,_polyaminesxArginine_Biosynthesis_extended
172039283	LAADLGQGDELGPIQAK	ref|NC_010546.1|:4511685-4512887_argininosuccinate_synthase_[Cyanothece_sp._ATCC_51142	si_0006x1xAmino_Acids_and_DerivativesxArginine;_urea_cycle,_polyaminesxArginine_Biosynthesis_extended
172039283	LFKGNANIVGR	ref|NC_010546.1|:4511685-4512887_argininosuccinate_synthase_[Cyanothece_sp._ATCC_51142	si_0006x1xAmino_Acids_and_DerivativesxArginine;_urea_cycle,_polyaminesxArginine_Biosynthesis_extended
172039283	LKESLDAFIDHTQER	ref|NC_010546.1|:4511685-4512887_argininosuccinate_synthase_[Cyanothece_sp._ATCC_51142	si_0006x1xAmino_Acids_and_DerivativesxArginine;_urea_cycle,_polyaminesxArginine_Biosynthesis_extended
172039283	LSTALARPLIAK	ref|NC_010546.1|:4511685-4512887_argininosuccinate_synthase_[Cyanothece_sp._ATCC_51142	si_0006x1xAmino_Acids_and_DerivativesxArginine;_urea_cycle,_polyaminesxArginine_Biosynthesis_extended
172039283	MSREQTIAYGEK	ref|NC_010546.1|:4511685-4512887_argininosuccinate_synthase_[Cyanothece_sp._ATCC_51142	si_0006x1xAmino_Acids_and_DerivativesxArginine;_urea_cycle,_polyaminesxArginine_Biosynthesis_extended
172039283	QSDYSIYSPNLATYGEDDHFDHK	ref|NC_010546.1|:4511685-4512887_argininosuccinate_synthase_[Cyanothece_sp._ATCC_51142	si_0006x1xAmino_Acids_and_DerivativesxArginine;_urea_cycle,_polyaminesxArginine_Biosynthesis_extended
172039283	QSDYSIYSPNLATYGEDDHFDHKAAEGFIYIWGLPTR	ref|NC_010546.1|:4511685-4512887_argininosuccinate_synthase_[Cyanothece_sp._ATCC_51142	si_0006x1xAmino_Acids_and_DerivativesxArginine;_urea_cycle,_polyaminesxArginine_Biosynthesis_extended
172039283	SGAVESLVEDATAEFVTDYAFK	ref|NC_010546.1|:4511685-4512887_argininosuccinate_synthase_[Cyanothece_sp._ATCC_51142	si_0006x1xAmino_Acids_and_DerivativesxArginine;_urea_cycle,_polyaminesxArginine_Biosynthesis_extended
172039283	SIEAGPLED	ref|NC_010546.1|:4511685-4512887_argininosuccinate_synthase_[Cyanothece_sp._ATCC_51142	si_0006x1xAmino_Acids_and_DerivativesxArginine;_urea_cycle,_polyaminesxArginine_Biosynthesis_extended
172039283	SIEAGPLEDPMTEPPEEIYLMTK	ref|NC_010546.1|:4511685-4512887_argininosuccinate_synthase_[Cyanothece_sp._ATCC_51142	si_0006x1xAmino_Acids_and_DerivativesxArginine;_urea_cycle,_polyaminesxArginine_Biosynthesis_extended
172039283	SREIYEAPALLVLIDAHR	ref|NC_010546.1|:4511685-4512887_argininosuccinate_synthase_[Cyanothece_sp._ATCC_51142	si_0006x1xAmino_Acids_and_DerivativesxArginine;_urea_cycle,_polyaminesxArginine_Biosynthesis_extended
172039283	SREIYEAPALLVLIDAHRDLESLTLTSDVTHYK	ref|NC_010546.1|:4511685-4512887_argininosuccinate_synthase_[Cyanothece_sp._ATCC_51142	si_0006x1xAmino_Acids_and_DerivativesxArginine;_urea_cycle,_polyaminesxArginine_Biosynthesis_extended
172039283	SSPFSIDRNLLGR	ref|NC_010546.1|:4511685-4512887_argininosuccinate_synthase_[Cyanothece_sp._ATCC_51142	si_0006x1xAmino_Acids_and_DerivativesxArginine;_urea_cycle,_polyaminesxArginine_Biosynthesis_extended
172039283	YPLSTALAR	ref|NC_010546.1|:4511685-4512887_argininosuccinate_synthase_[Cyanothece_sp._ATCC_51142	si_0006x1xAmino_Acids_and_DerivativesxArginine;_urea_cycle,_polyaminesxArginine_Biosynthesis_extended
172039283	YPLSTALARP	ref|NC_010546.1|:4511685-4512887_argininosuccinate_synthase_[Cyanothece_sp._ATCC_51142	si_0006x1xAmino_Acids_and_DerivativesxArginine;_urea_cycle,_polyaminesxArginine_Biosynthesis_extended
172039283	YPLSTALARPLIAK	ref|NC_010546.1|:4511685-4512887_argininosuccinate_synthase_[Cyanothece_sp._ATCC_51142	si_0006x1xAmino_Acids_and_DerivativesxArginine;_urea_cycle,_polyaminesxArginine_Biosynthesis_extended
172039281	IGLLGASVTQHPEFNDLLDYLYQPK	ref|NC_010546.1|:c4510933-4509326_hypothetical_protein_cce_4368_[Cyanothece_sp._ATCC_51142	si_0962x1xNo_Function_MatchxNo_Function_MatchxNone
172039281	SVTIAVESGSEK	ref|NC_010546.1|:c4510933-4509326_hypothetical_protein_cce_4368_[Cyanothece_sp._ATCC_51142	si_0962x1xNo_Function_MatchxNo_Function_MatchxNone
172039274	FLRDELVLQDLEK	ref|NC_010546.1|:c4507553-4506417_hypothetical_protein_cce_4361_[Cyanothece_sp._ATCC_51142	si_0962x1xNo_Function_MatchxNo_Function_MatchxNone
172039274	FLRDELVLQDLEKLK	ref|NC_010546.1|:c4507553-4506417_hypothetical_protein_cce_4361_[Cyanothece_sp._ATCC_51142	si_0962x1xNo_Function_MatchxNo_Function_MatchxNone
172039274	FLRDELVLQDLEKLKK	ref|NC_010546.1|:c4507553-4506417_hypothetical_protein_cce_4361_[Cyanothece_sp._ATCC_51142	si_0962x1xNo_Function_MatchxNo_Function_MatchxNone
172039274	IIQLTEDTDEETRR	ref|NC_010546.1|:c4507553-4506417_hypothetical_protein_cce_4361_[Cyanothece_sp._ATCC_51142	si_0962x1xNo_Function_MatchxNo_Function_MatchxNone
172039274	KKVVDYNTIEYPIEVIVDKFLEGQDDDLNELFIPDYQR	ref|NC_010546.1|:c4507553-4506417_hypothetical_protein_cce_4361_[Cyanothece_sp._ATCC_51142	si_0962x1xNo_Function_MatchxNo_Function_MatchxNone
172039274	LLDSKEFKEYTKGDGSSSK	ref|NC_010546.1|:c4507553-4506417_hypothetical_protein_cce_4361_[Cyanothece_sp._ATCC_51142	si_0962x1xNo_Function_MatchxNo_Function_MatchxNone
172039274	VVDYNTIEYPIEVIVDKFLEGQDDDLNELFIPDYQR	ref|NC_010546.1|:c4507553-4506417_hypothetical_protein_cce_4361_[Cyanothece_sp._ATCC_51142	si_0962x1xNo_Function_MatchxNo_Function_MatchxNone
172039273	AKEVSDYFTFLRDLEQQR	ref|NC_010546.1|:c4506414-4505752_hypothetical_protein_cce_4360_[Cyanothece_sp._ATCC_51142
172039273	LIEDGQISK	ref|NC_010546.1|:c4506414-4505752_hypothetical_protein_cce_4360_[Cyanothece_sp._ATCC_51142
172039273	NAIELIFDEIQTK	ref|NC_010546.1|:c4506414-4505752_hypothetical_protein_cce_4360_[Cyanothece_sp._ATCC_51142
172039273	NRNDLAHGFVSFNDIGK	ref|NC_010546.1|:c4506414-4505752_hypothetical_protein_cce_4360_[Cyanothece_sp._ATCC_51142
172039271	HFGNVFIGVQPTFGYEGDPMR	ref|NC_010546.1|:4500366-4504412_magnesium_chelatase_subunit_H_[Cyanothece_sp._ATCC_51142	si_0389x0.5xCofactors,_Vitamins,_Prosthetic_Groups,_PigmentsxTetrapyrrolesxChlorophyll_Biosynthesis
172039267	AIAGGLLVQDSDDLVDVPDNWEIVTEK	ref|NC_010546.1|:c4495817-4494249_bifunctional_phosphoribosylaminoimidazolecarboxamide_formyltransferase/IMP_cyclohydrolase_[Cyanothece_sp._ATCC_51142	si_0362x0.3xCofactors,_Vitamins,_Prosthetic_Groups,_PigmentsxFolate_and_pterinesx5-FCL-like_protein
172039267	AIAGGLLVQDSDDLVDVPDNWEIVTEKQPTPEQLAELLFAWK	ref|NC_010546.1|:c4495817-4494249_bifunctional_phosphoribosylaminoimidazolecarboxamide_formyltransferase/IMP_cyclohydrolase_[Cyanothece_sp._ATCC_51142	si_0362x0.3xCofactors,_Vitamins,_Prosthetic_Groups,_PigmentsxFolate_and_pterinesx5-FCL-like_protein
172039267	ARLALLSVSDKTGIIELAR	ref|NC_010546.1|:c4495817-4494249_bifunctional_phosphoribosylaminoimidazolecarboxamide_formyltransferase/IMP_cyclohydrolase_[Cyanothece_sp._ATCC_51142	si_0362x0.3xCofactors,_Vitamins,_Prosthetic_Groups,_PigmentsxFolate_and_pterinesx5-FCL-like_protein
172039267	DIPQDVEDMNSNNIRPIDLVVVNLYPFEETIAKPDVTVAEAIEK	ref|NC_010546.1|:c4495817-4494249_bifunctional_phosphoribosylaminoimidazolecarboxamide_formyltransferase/IMP_cyclohydrolase_[Cyanothece_sp._ATCC_51142	si_0362x0.3xCofactors,_Vitamins,_Prosthetic_Groups,_PigmentsxFolate_and_pterinesx5-FCL-like_protein
172039267	DLTQGPKQTVK	ref|NC_010546.1|:c4495817-4494249_bifunctional_phosphoribosylaminoimidazolecarboxamide_formyltransferase/IMP_cyclohydrolase_[Cyanothece_sp._ATCC_51142	si_0362x0.3xCofactors,_Vitamins,_Prosthetic_Groups,_PigmentsxFolate_and_pterinesx5-FCL-like_protein
172039267	DNNGETSLSFR	ref|NC_010546.1|:c4495817-4494249_bifunctional_phosphoribosylaminoimidazolecarboxamide_formyltransferase/IMP_cyclohydrolase_[Cyanothece_sp._ATCC_51142	si_0362x0.3xCofactors,_Vitamins,_Prosthetic_Groups,_PigmentsxFolate_and_pterinesx5-FCL-like_protein
172039267	GIQATGWAAATQLQGK	ref|NC_010546.1|:c4495817-4494249_bifunctional_phosphoribosylaminoimidazolecarboxamide_formyltransferase/IMP_cyclohydrolase_[Cyanothece_sp._ATCC_51142	si_0362x0.3xCofactors,_Vitamins,_Prosthetic_Groups,_PigmentsxFolate_and_pterinesx5-FCL-like_protein
172039267	GIQATGWAAATQLQGKELSYNNLVDLEAARR	ref|NC_010546.1|:c4495817-4494249_bifunctional_phosphoribosylaminoimidazolecarboxamide_formyltransferase/IMP_cyclohydrolase_[Cyanothece_sp._ATCC_51142	si_0362x0.3xCofactors,_Vitamins,_Prosthetic_Groups,_PigmentsxFolate_and_pterinesx5-FCL-like_protein
172039267	GTAFQPLRYGENPHQSATWYQR	ref|NC_010546.1|:c4495817-4494249_bifunctional_phosphoribosylaminoimidazolecarboxamide_formyltransferase/IMP_cyclohydrolase_[Cyanothece_sp._ATCC_51142	si_0362x0.3xCofactors,_Vitamins,_Prosthetic_Groups,_PigmentsxFolate_and_pterinesx5-FCL-like_protein
172039267	IALEEAGEATK	ref|NC_010546.1|:c4495817-4494249_bifunctional_phosphoribosylaminoimidazolecarboxamide_formyltransferase/IMP_cyclohydrolase_[Cyanothece_sp._ATCC_51142	si_0362x0.3xCofactors,_Vitamins,_Prosthetic_Groups,_PigmentsxFolate_and_pterinesx5-FCL-like_protein
172039267	IALEEAGEATKGGYLASDGFFPFDDSVR	ref|NC_010546.1|:c4495817-4494249_bifunctional_phosphoribosylaminoimidazolecarboxamide_formyltransferase/IMP_cyclohydrolase_[Cyanothece_sp._ATCC_51142	si_0362x0.3xCofactors,_Vitamins,_Prosthetic_Groups,_PigmentsxFolate_and_pterinesx5-FCL-like_protein
172039267	IDIGGPTLLR	ref|NC_010546.1|:c4495817-4494249_bifunctional_phosphoribosylaminoimidazolecarboxamide_formyltransferase/IMP_cyclohydrolase_[Cyanothece_sp._ATCC_51142	si_0362x0.3xCofactors,_Vitamins,_Prosthetic_Groups,_PigmentsxFolate_and_pterinesx5-FCL-like_protein
172039267	LALLSVSDKTGIIELAR	ref|NC_010546.1|:c4495817-4494249_bifunctional_phosphoribosylaminoimidazolecarboxamide_formyltransferase/IMP_cyclohydrolase_[Cyanothece_sp._ATCC_51142	si_0362x0.3xCofactors,_Vitamins,_Prosthetic_Groups,_PigmentsxFolate_and_pterinesx5-FCL-like_protein
172039267	MAGETFALTNAYDGAITDYFANLATEK	ref|NC_010546.1|:c4495817-4494249_bifunctional_phosphoribosylaminoimidazolecarboxamide_formyltransferase/IMP_cyclohydrolase_[Cyanothece_sp._ATCC_51142	si_0362x0.3xCofactors,_Vitamins,_Prosthetic_Groups,_PigmentsxFolate_and_pterinesx5-FCL-like_protein
172039267	NFAHVTVLSNPK	ref|NC_010546.1|:c4495817-4494249_bifunctional_phosphoribosylaminoimidazolecarboxamide_formyltransferase/IMP_cyclohydrolase_[Cyanothece_sp._ATCC_51142	si_0362x0.3xCofactors,_Vitamins,_Prosthetic_Groups,_PigmentsxFolate_and_pterinesx5-FCL-like_protein
172039267	NFAHVTVLSNPKDYDHYLQELK	ref|NC_010546.1|:c4495817-4494249_bifunctional_phosphoribosylaminoimidazolecarboxamide_formyltransferase/IMP_cyclohydrolase_[Cyanothece_sp._ATCC_51142	si_0362x0.3xCofactors,_Vitamins,_Prosthetic_Groups,_PigmentsxFolate_and_pterinesx5-FCL-like_protein
172039267	NFAHVTVLSNPKDYDHYLQELKDNNGETSLSFR	ref|NC_010546.1|:c4495817-4494249_bifunctional_phosphoribosylaminoimidazolecarboxamide_formyltransferase/IMP_cyclohydrolase_[Cyanothece_sp._ATCC_51142	si_0362x0.3xCofactors,_Vitamins,_Prosthetic_Groups,_PigmentsxFolate_and_pterinesx5-FCL-like_protein
172039267	NRTTLGIGAGQMNR	ref|NC_010546.1|:c4495817-4494249_bifunctional_phosphoribosylaminoimidazolecarboxamide_formyltransferase/IMP_cyclohydrolase_[Cyanothece_sp._ATCC_51142	si_0362x0.3xCofactors,_Vitamins,_Prosthetic_Groups,_PigmentsxFolate_and_pterinesx5-FCL-like_protein
172039267	QKMAGETFALTNAYDGAITDYFANLATEK	ref|NC_010546.1|:c4495817-4494249_bifunctional_phosphoribosylaminoimidazolecarboxamide_formyltransferase/IMP_cyclohydrolase_[Cyanothece_sp._ATCC_51142	si_0362x0.3xCofactors,_Vitamins,_Prosthetic_Groups,_PigmentsxFolate_and_pterinesx5-FCL-like_protein
172039267	QLVNEFGFELISSGGTAK	ref|NC_010546.1|:c4495817-4494249_bifunctional_phosphoribosylaminoimidazolecarboxamide_formyltransferase/IMP_cyclohydrolase_[Cyanothece_sp._ATCC_51142	si_0362x0.3xCofactors,_Vitamins,_Prosthetic_Groups,_PigmentsxFolate_and_pterinesx5-FCL-like_protein
172039267	QPTPEQLAELLFAWK	ref|NC_010546.1|:c4495817-4494249_bifunctional_phosphoribosylaminoimidazolecarboxamide_formyltransferase/IMP_cyclohydrolase_[Cyanothece_sp._ATCC_51142	si_0362x0.3xCofactors,_Vitamins,_Prosthetic_Groups,_PigmentsxFolate_and_pterinesx5-FCL-like_protein
172039267	RIIAEFDPKEPAAAVLK	ref|NC_010546.1|:c4495817-4494249_bifunctional_phosphoribosylaminoimidazolecarboxamide_formyltransferase/IMP_cyclohydrolase_[Cyanothece_sp._ATCC_51142	si_0362x0.3xCofactors,_Vitamins,_Prosthetic_Groups,_PigmentsxFolate_and_pterinesx5-FCL-like_protein
172039267	SNAIVVTK	ref|NC_010546.1|:c4495817-4494249_bifunctional_phosphoribosylaminoimidazolecarboxamide_formyltransferase/IMP_cyclohydrolase_[Cyanothece_sp._ATCC_51142	si_0362x0.3xCofactors,_Vitamins,_Prosthetic_Groups,_PigmentsxFolate_and_pterinesx5-FCL-like_protein
172039267	TAAAAGISAIVQPGGSLR	ref|NC_010546.1|:c4495817-4494249_bifunctional_phosphoribosylaminoimidazolecarboxamide_formyltransferase/IMP_cyclohydrolase_[Cyanothece_sp._ATCC_51142	si_0362x0.3xCofactors,_Vitamins,_Prosthetic_Groups,_PigmentsxFolate_and_pterinesx5-FCL-like_protein
172039267	TAAAAGISAIVQPGGSLRDKDSIAAANELGLVMVLTK	ref|NC_010546.1|:c4495817-4494249_bifunctional_phosphoribosylaminoimidazolecarboxamide_formyltransferase/IMP_cyclohydrolase_[Cyanothece_sp._ATCC_51142	si_0362x0.3xCofactors,_Vitamins,_Prosthetic_Groups,_PigmentsxFolate_and_pterinesx5-FCL-like_protein
172039267	TFLECVVAPDCTEEAKEIISK	ref|NC_010546.1|:c4495817-4494249_bifunctional_phosphoribosylaminoimidazolecarboxamide_formyltransferase/IMP_cyclohydrolase_[Cyanothece_sp._ATCC_51142	si_0362x0.3xCofactors,_Vitamins,_Prosthetic_Groups,_PigmentsxFolate_and_pterinesx5-FCL-like_protein
172039267	TLQEAGLKVTK	ref|NC_010546.1|:c4495817-4494249_bifunctional_phosphoribosylaminoimidazolecarboxamide_formyltransferase/IMP_cyclohydrolase_[Cyanothece_sp._ATCC_51142	si_0362x0.3xCofactors,_Vitamins,_Prosthetic_Groups,_PigmentsxFolate_and_pterinesx5-FCL-like_protein
172039267	TTLGIGAGQMNR	ref|NC_010546.1|:c4495817-4494249_bifunctional_phosphoribosylaminoimidazolecarboxamide_formyltransferase/IMP_cyclohydrolase_[Cyanothece_sp._ATCC_51142	si_0362x0.3xCofactors,_Vitamins,_Prosthetic_Groups,_PigmentsxFolate_and_pterinesx5-FCL-like_protein
172039267	VGAVKIALEEAGEATKGGYLASDGFFPFDDSVR	ref|NC_010546.1|:c4495817-4494249_bifunctional_phosphoribosylaminoimidazolecarboxamide_formyltransferase/IMP_cyclohydrolase_[Cyanothece_sp._ATCC_51142	si_0362x0.3xCofactors,_Vitamins,_Prosthetic_Groups,_PigmentsxFolate_and_pterinesx5-FCL-like_protein
172039267	VLLLPDLTQGPK	ref|NC_010546.1|:c4495817-4494249_bifunctional_phosphoribosylaminoimidazolecarboxamide_formyltransferase/IMP_cyclohydrolase_[Cyanothece_sp._ATCC_51142	si_0362x0.3xCofactors,_Vitamins,_Prosthetic_Groups,_PigmentsxFolate_and_pterinesx5-FCL-like_protein
172039267	VLLLPDLTQGPKQTVK	ref|NC_010546.1|:c4495817-4494249_bifunctional_phosphoribosylaminoimidazolecarboxamide_formyltransferase/IMP_cyclohydrolase_[Cyanothece_sp._ATCC_51142	si_0362x0.3xCofactors,_Vitamins,_Prosthetic_Groups,_PigmentsxFolate_and_pterinesx5-FCL-like_protein
172039267	VRVLLLPDLTQGPK	ref|NC_010546.1|:c4495817-4494249_bifunctional_phosphoribosylaminoimidazolecarboxamide_formyltransferase/IMP_cyclohydrolase_[Cyanothece_sp._ATCC_51142	si_0362x0.3xCofactors,_Vitamins,_Prosthetic_Groups,_PigmentsxFolate_and_pterinesx5-FCL-like_protein
172039267	VSDYTGSPEILGGR	ref|NC_010546.1|:c4495817-4494249_bifunctional_phosphoribosylaminoimidazolecarboxamide_formyltransferase/IMP_cyclohydrolase_[Cyanothece_sp._ATCC_51142	si_0362x0.3xCofactors,_Vitamins,_Prosthetic_Groups,_PigmentsxFolate_and_pterinesx5-FCL-like_protein
172039267	YGENPHQSATWYQR	ref|NC_010546.1|:c4495817-4494249_bifunctional_phosphoribosylaminoimidazolecarboxamide_formyltransferase/IMP_cyclohydrolase_[Cyanothece_sp._ATCC_51142	si_0362x0.3xCofactors,_Vitamins,_Prosthetic_Groups,_PigmentsxFolate_and_pterinesx5-FCL-like_protein
172039267	YTISGTAFQPLR	ref|NC_010546.1|:c4495817-4494249_bifunctional_phosphoribosylaminoimidazolecarboxamide_formyltransferase/IMP_cyclohydrolase_[Cyanothece_sp._ATCC_51142	si_0362x0.3xCofactors,_Vitamins,_Prosthetic_Groups,_PigmentsxFolate_and_pterinesx5-FCL-like_protein
172039266	ANADIIQISGHDGGTGASPLSSIK	ref|NC_010546.1|:c4493863-4489181_ferredoxin-dependent_glutamate_synthase_[Cyanothece_sp._ATCC_51142	si_0032x0.2xAmino_Acids_and_DerivativesxGlutamine,_glutamate,_aspartate,_asparagine;_ammonia_assimilationxGlutamine,_Glutamate,_Aspartate_and_Asparagine_Biosynthesis
172039266	ANLTVLGWR	ref|NC_010546.1|:c4493863-4489181_ferredoxin-dependent_glutamate_synthase_[Cyanothece_sp._ATCC_51142	si_0032x0.2xAmino_Acids_and_DerivativesxGlutamine,_glutamate,_aspartate,_asparagine;_ammonia_assimilationxGlutamine,_Glutamate,_Aspartate_and_Asparagine_Biosynthesis
172039266	AYKIGENGANAEAYDHYELYQK	ref|NC_010546.1|:c4493863-4489181_ferredoxin-dependent_glutamate_synthase_[Cyanothece_sp._ATCC_51142	si_0032x0.2xAmino_Acids_and_DerivativesxGlutamine,_glutamate,_aspartate,_asparagine;_ammonia_assimilationxGlutamine,_Glutamate,_Aspartate_and_Asparagine_Biosynthesis
172039266	DLKDYPEITDFYDYYSGFQEPWDGPALLAFSDGK	ref|NC_010546.1|:c4493863-4489181_ferredoxin-dependent_glutamate_synthase_[Cyanothece_sp._ATCC_51142	si_0032x0.2xAmino_Acids_and_DerivativesxGlutamine,_glutamate,_aspartate,_asparagine;_ammonia_assimilationxGlutamine,_Glutamate,_Aspartate_and_Asparagine_Biosynthesis
172039266	DLLEFKGDQPSIPVEEVEPVEAIVKR	ref|NC_010546.1|:c4493863-4489181_ferredoxin-dependent_glutamate_synthase_[Cyanothece_sp._ATCC_51142	si_0032x0.2xAmino_Acids_and_DerivativesxGlutamine,_glutamate,_aspartate,_asparagine;_ammonia_assimilationxGlutamine,_Glutamate,_Aspartate_and_Asparagine_Biosynthesis
172039266	EAHETLAIAMNR	ref|NC_010546.1|:c4493863-4489181_ferredoxin-dependent_glutamate_synthase_[Cyanothece_sp._ATCC_51142	si_0032x0.2xAmino_Acids_and_DerivativesxGlutamine,_glutamate,_aspartate,_asparagine;_ammonia_assimilationxGlutamine,_Glutamate,_Aspartate_and_Asparagine_Biosynthesis
172039266	EVPVNPDVLGVQAK	ref|NC_010546.1|:c4493863-4489181_ferredoxin-dependent_glutamate_synthase_[Cyanothece_sp._ATCC_51142	si_0032x0.2xAmino_Acids_and_DerivativesxGlutamine,_glutamate,_aspartate,_asparagine;_ammonia_assimilationxGlutamine,_Glutamate,_Aspartate_and_Asparagine_Biosynthesis
172039266	FGVTPEYLMNGQQIEIK	ref|NC_010546.1|:c4493863-4489181_ferredoxin-dependent_glutamate_synthase_[Cyanothece_sp._ATCC_51142	si_0032x0.2xAmino_Acids_and_DerivativesxGlutamine,_glutamate,_aspartate,_asparagine;_ammonia_assimilationxGlutamine,_Glutamate,_Aspartate_and_Asparagine_Biosynthesis
172039266	FITLSDVDESGNSATFPHLNGLR	ref|NC_010546.1|:c4493863-4489181_ferredoxin-dependent_glutamate_synthase_[Cyanothece_sp._ATCC_51142	si_0032x0.2xAmino_Acids_and_DerivativesxGlutamine,_glutamate,_aspartate,_asparagine;_ammonia_assimilationxGlutamine,_Glutamate,_Aspartate_and_Asparagine_Biosynthesis
172039266	GGEYHMNSPEMAK	ref|NC_010546.1|:c4493863-4489181_ferredoxin-dependent_glutamate_synthase_[Cyanothece_sp._ATCC_51142	si_0032x0.2xAmino_Acids_and_DerivativesxGlutamine,_glutamate,_aspartate,_asparagine;_ammonia_assimilationxGlutamine,_Glutamate,_Aspartate_and_Asparagine_Biosynthesis
172039266	GLIEAHFER	ref|NC_010546.1|:c4493863-4489181_ferredoxin-dependent_glutamate_synthase_[Cyanothece_sp._ATCC_51142	si_0032x0.2xAmino_Acids_and_DerivativesxGlutamine,_glutamate,_aspartate,_asparagine;_ammonia_assimilationxGlutamine,_Glutamate,_Aspartate_and_Asparagine_Biosynthesis
172039266	GMHGGEVVIVPPKDATYK	ref|NC_010546.1|:c4493863-4489181_ferredoxin-dependent_glutamate_synthase_[Cyanothece_sp._ATCC_51142	si_0032x0.2xAmino_Acids_and_DerivativesxGlutamine,_glutamate,_aspartate,_asparagine;_ammonia_assimilationxGlutamine,_Glutamate,_Aspartate_and_Asparagine_Biosynthesis
172039266	KYGNTGFSGELK	ref|NC_010546.1|:c4493863-4489181_ferredoxin-dependent_glutamate_synthase_[Cyanothece_sp._ATCC_51142	si_0032x0.2xAmino_Acids_and_DerivativesxGlutamine,_glutamate,_aspartate,_asparagine;_ammonia_assimilationxGlutamine,_Glutamate,_Aspartate_and_Asparagine_Biosynthesis
172039266	LKNFGFINYRP	ref|NC_010546.1|:c4493863-4489181_ferredoxin-dependent_glutamate_synthase_[Cyanothece_sp._ATCC_51142	si_0032x0.2xAmino_Acids_and_DerivativesxGlutamine,_glutamate,_aspartate,_asparagine;_ammonia_assimilationxGlutamine,_Glutamate,_Aspartate_and_Asparagine_Biosynthesis
172039266	LLGHNGEINTLIGNINSMATR	ref|NC_010546.1|:c4493863-4489181_ferredoxin-dependent_glutamate_synthase_[Cyanothece_sp._ATCC_51142	si_0032x0.2xAmino_Acids_and_DerivativesxGlutamine,_glutamate,_aspartate,_asparagine;_ammonia_assimilationxGlutamine,_Glutamate,_Aspartate_and_Asparagine_Biosynthesis
172039266	LLKVESPVLNETELEQIK	ref|NC_010546.1|:c4493863-4489181_ferredoxin-dependent_glutamate_synthase_[Cyanothece_sp._ATCC_51142	si_0032x0.2xAmino_Acids_and_DerivativesxGlutamine,_glutamate,_aspartate,_asparagine;_ammonia_assimilationxGlutamine,_Glutamate,_Aspartate_and_Asparagine_Biosynthesis
172039266	MAQGAKPGEGGQLPGK	ref|NC_010546.1|:c4493863-4489181_ferredoxin-dependent_glutamate_synthase_[Cyanothece_sp._ATCC_51142	si_0032x0.2xAmino_Acids_and_DerivativesxGlutamine,_glutamate,_aspartate,_asparagine;_ammonia_assimilationxGlutamine,_Glutamate,_Aspartate_and_Asparagine_Biosynthesis
172039266	NFGFINYRPGGEYHMNSPEMAK	ref|NC_010546.1|:c4493863-4489181_ferredoxin-dependent_glutamate_synthase_[Cyanothece_sp._ATCC_51142	si_0032x0.2xAmino_Acids_and_DerivativesxGlutamine,_glutamate,_aspartate,_asparagine;_ammonia_assimilationxGlutamine,_Glutamate,_Aspartate_and_Asparagine_Biosynthesis
172039266	NGDTASSAIK	ref|NC_010546.1|:c4493863-4489181_ferredoxin-dependent_glutamate_synthase_[Cyanothece_sp._ATCC_51142	si_0032x0.2xAmino_Acids_and_DerivativesxGlutamine,_glutamate,_aspartate,_asparagine;_ammonia_assimilationxGlutamine,_Glutamate,_Aspartate_and_Asparagine_Biosynthesis
172039266	NGDTASSAIKQVASGR	ref|NC_010546.1|:c4493863-4489181_ferredoxin-dependent_glutamate_synthase_[Cyanothece_sp._ATCC_51142	si_0032x0.2xAmino_Acids_and_DerivativesxGlutamine,_glutamate,_aspartate,_asparagine;_ammonia_assimilationxGlutamine,_Glutamate,_Aspartate_and_Asparagine_Biosynthesis
172039266	NVGAGMTGGLAYFLDEDNNFPEKVNPEIVEIQR	ref|NC_010546.1|:c4493863-4489181_ferredoxin-dependent_glutamate_synthase_[Cyanothece_sp._ATCC_51142	si_0032x0.2xAmino_Acids_and_DerivativesxGlutamine,_glutamate,_aspartate,_asparagine;_ammonia_assimilationxGlutamine,_Glutamate,_Aspartate_and_Asparagine_Biosynthesis
172039266	SAVLGEFYQDLNDPNYISR	ref|NC_010546.1|:c4493863-4489181_ferredoxin-dependent_glutamate_synthase_[Cyanothece_sp._ATCC_51142	si_0032x0.2xAmino_Acids_and_DerivativesxGlutamine,_glutamate,_aspartate,_asparagine;_ammonia_assimilationxGlutamine,_Glutamate,_Aspartate_and_Asparagine_Biosynthesis
172039266	SNSGEGGEDPTRFITLSDVDESGNSATFPHLNGLR	ref|NC_010546.1|:c4493863-4489181_ferredoxin-dependent_glutamate_synthase_[Cyanothece_sp._ATCC_51142	si_0032x0.2xAmino_Acids_and_DerivativesxGlutamine,_glutamate,_aspartate,_asparagine;_ammonia_assimilationxGlutamine,_Glutamate,_Aspartate_and_Asparagine_Biosynthesis
172039266	SPLEAAMILVPEAYK	ref|NC_010546.1|:c4493863-4489181_ferredoxin-dependent_glutamate_synthase_[Cyanothece_sp._ATCC_51142	si_0032x0.2xAmino_Acids_and_DerivativesxGlutamine,_glutamate,_aspartate,_asparagine;_ammonia_assimilationxGlutamine,_Glutamate,_Aspartate_and_Asparagine_Biosynthesis
172039266	SWLNHEDVHSNGPVLDDELLADAAVSSAINTHGR	ref|NC_010546.1|:c4493863-4489181_ferredoxin-dependent_glutamate_synthase_[Cyanothece_sp._ATCC_51142	si_0032x0.2xAmino_Acids_and_DerivativesxGlutamine,_glutamate,_aspartate,_asparagine;_ammonia_assimilationxGlutamine,_Glutamate,_Aspartate_and_Asparagine_Biosynthesis
172039266	VESPVLNETELEQIKTSDFNTTELSTLFDIK	ref|NC_010546.1|:c4493863-4489181_ferredoxin-dependent_glutamate_synthase_[Cyanothece_sp._ATCC_51142	si_0032x0.2xAmino_Acids_and_DerivativesxGlutamine,_glutamate,_aspartate,_asparagine;_ammonia_assimilationxGlutamine,_Glutamate,_Aspartate_and_Asparagine_Biosynthesis
172039266	VGGLNIAELAQEIIAVHSR	ref|NC_010546.1|:c4493863-4489181_ferredoxin-dependent_glutamate_synthase_[Cyanothece_sp._ATCC_51142	si_0032x0.2xAmino_Acids_and_DerivativesxGlutamine,_glutamate,_aspartate,_asparagine;_ammonia_assimilationxGlutamine,_Glutamate,_Aspartate_and_Asparagine_Biosynthesis
172039266	YGNTGFSGELK	ref|NC_010546.1|:c4493863-4489181_ferredoxin-dependent_glutamate_synthase_[Cyanothece_sp._ATCC_51142	si_0032x0.2xAmino_Acids_and_DerivativesxGlutamine,_glutamate,_aspartate,_asparagine;_ammonia_assimilationxGlutamine,_Glutamate,_Aspartate_and_Asparagine_Biosynthesis
172039266	YLEERPITALRDLLEFKGDQPSIPVEEVEPVEAIVK	ref|NC_010546.1|:c4493863-4489181_ferredoxin-dependent_glutamate_synthase_[Cyanothece_sp._ATCC_51142	si_0032x0.2xAmino_Acids_and_DerivativesxGlutamine,_glutamate,_aspartate,_asparagine;_ammonia_assimilationxGlutamine,_Glutamate,_Aspartate_and_Asparagine_Biosynthesis
172039266	YLEERPITALRDLLEFKGDQPSIPVEEVEPVEAIVKR	ref|NC_010546.1|:c4493863-4489181_ferredoxin-dependent_glutamate_synthase_[Cyanothece_sp._ATCC_51142	si_0032x0.2xAmino_Acids_and_DerivativesxGlutamine,_glutamate,_aspartate,_asparagine;_ammonia_assimilationxGlutamine,_Glutamate,_Aspartate_and_Asparagine_Biosynthesis
172039260	AAEFNKEITLQQWDKLSPLQR	ref|NC_010546.1|:4485479-4485928_CHP02664-containing_protein_[Cyanothece_sp._ATCC_51142	si_0962x1xNo_Function_MatchxNo_Function_MatchxNone
172039259	AIALAYVPTALSK	ref|NC_010546.1|:c4485382-4484273_glycine_cleavage_system_aminomethyltransferase_T_[Cyanothece_sp._ATCC_51142	si_0002x0.3xAmino_Acids_and_DerivativesxAlanine,_serine,_and_glycinexGlycine_and_Serine_Utilization
172039259	ANSNVSDSLLR	ref|NC_010546.1|:c4485382-4484273_glycine_cleavage_system_aminomethyltransferase_T_[Cyanothece_sp._ATCC_51142	si_0002x0.3xAmino_Acids_and_DerivativesxAlanine,_serine,_and_glycinexGlycine_and_Serine_Utilization
172039259	ANSNVSDSLLRTPLYDLIIQQK	ref|NC_010546.1|:c4485382-4484273_glycine_cleavage_system_aminomethyltransferase_T_[Cyanothece_sp._ATCC_51142	si_0002x0.3xAmino_Acids_and_DerivativesxAlanine,_serine,_and_glycinexGlycine_and_Serine_Utilization
172039259	EVLEKQATEGVK	ref|NC_010546.1|:c4485382-4484273_glycine_cleavage_system_aminomethyltransferase_T_[Cyanothece_sp._ATCC_51142	si_0002x0.3xAmino_Acids_and_DerivativesxAlanine,_serine,_and_glycinexGlycine_and_Serine_Utilization
172039259	EVLEKQATEGVKR	ref|NC_010546.1|:c4485382-4484273_glycine_cleavage_system_aminomethyltransferase_T_[Cyanothece_sp._ATCC_51142	si_0002x0.3xAmino_Acids_and_DerivativesxAlanine,_serine,_and_glycinexGlycine_and_Serine_Utilization
172039259	FTLEGEGLFPMLQSLVPSDLER	ref|NC_010546.1|:c4485382-4484273_glycine_cleavage_system_aminomethyltransferase_T_[Cyanothece_sp._ATCC_51142	si_0002x0.3xAmino_Acids_and_DerivativesxAlanine,_serine,_and_glycinexGlycine_and_Serine_Utilization
172039259	HGYSVASEGK	ref|NC_010546.1|:c4485382-4484273_glycine_cleavage_system_aminomethyltransferase_T_[Cyanothece_sp._ATCC_51142	si_0002x0.3xAmino_Acids_and_DerivativesxAlanine,_serine,_and_glycinexGlycine_and_Serine_Utilization
172039259	HGYSVASEGKIVGEVTSGTIGPTVGK	ref|NC_010546.1|:c4485382-4484273_glycine_cleavage_system_aminomethyltransferase_T_[Cyanothece_sp._ATCC_51142	si_0002x0.3xAmino_Acids_and_DerivativesxAlanine,_serine,_and_glycinexGlycine_and_Serine_Utilization
172039259	IGTMVEVEIR	ref|NC_010546.1|:c4485382-4484273_glycine_cleavage_system_aminomethyltransferase_T_[Cyanothece_sp._ATCC_51142	si_0002x0.3xAmino_Acids_and_DerivativesxAlanine,_serine,_and_glycinexGlycine_and_Serine_Utilization
172039259	IVGEVTSGTIGPTVGK	ref|NC_010546.1|:c4485382-4484273_glycine_cleavage_system_aminomethyltransferase_T_[Cyanothece_sp._ATCC_51142	si_0002x0.3xAmino_Acids_and_DerivativesxAlanine,_serine,_and_glycinexGlycine_and_Serine_Utilization
172039259	LQPLVEADLTQLSFFGHTDTEVLGYPAFIAR	ref|NC_010546.1|:c4485382-4484273_glycine_cleavage_system_aminomethyltransferase_T_[Cyanothece_sp._ATCC_51142	si_0002x0.3xAmino_Acids_and_DerivativesxAlanine,_serine,_and_glycinexGlycine_and_Serine_Utilization
172039259	LVGLEMEGR	ref|NC_010546.1|:c4485382-4484273_glycine_cleavage_system_aminomethyltransferase_T_[Cyanothece_sp._ATCC_51142	si_0002x0.3xAmino_Acids_and_DerivativesxAlanine,_serine,_and_glycinexGlycine_and_Serine_Utilization
172039259	MTAFSGWEMPVQFTGLK	ref|NC_010546.1|:c4485382-4484273_glycine_cleavage_system_aminomethyltransferase_T_[Cyanothece_sp._ATCC_51142	si_0002x0.3xAmino_Acids_and_DerivativesxAlanine,_serine,_and_glycinexGlycine_and_Serine_Utilization
172039259	RLVGLEMEGR	ref|NC_010546.1|:c4485382-4484273_glycine_cleavage_system_aminomethyltransferase_T_[Cyanothece_sp._ATCC_51142	si_0002x0.3xAmino_Acids_and_DerivativesxAlanine,_serine,_and_glycinexGlycine_and_Serine_Utilization
172039259	TGVGMFDISHMGK	ref|NC_010546.1|:c4485382-4484273_glycine_cleavage_system_aminomethyltransferase_T_[Cyanothece_sp._ATCC_51142	si_0002x0.3xAmino_Acids_and_DerivativesxAlanine,_serine,_and_glycinexGlycine_and_Serine_Utilization
172039259	TGYTGEDGFEVMIDPEGGQELWR	ref|NC_010546.1|:c4485382-4484273_glycine_cleavage_system_aminomethyltransferase_T_[Cyanothece_sp._ATCC_51142	si_0002x0.3xAmino_Acids_and_DerivativesxAlanine,_serine,_and_glycinexGlycine_and_Serine_Utilization
172039259	TPLYDLIIQQK	ref|NC_010546.1|:c4485382-4484273_glycine_cleavage_system_aminomethyltransferase_T_[Cyanothece_sp._ATCC_51142	si_0002x0.3xAmino_Acids_and_DerivativesxAlanine,_serine,_and_glycinexGlycine_and_Serine_Utilization
172039259	VLLAIQGPETVEK	ref|NC_010546.1|:c4485382-4484273_glycine_cleavage_system_aminomethyltransferase_T_[Cyanothece_sp._ATCC_51142	si_0002x0.3xAmino_Acids_and_DerivativesxAlanine,_serine,_and_glycinexGlycine_and_Serine_Utilization
172039259	WILSNLGATSLNFTDVSSQK	ref|NC_010546.1|:c4485382-4484273_glycine_cleavage_system_aminomethyltransferase_T_[Cyanothece_sp._ATCC_51142	si_0002x0.3xAmino_Acids_and_DerivativesxAlanine,_serine,_and_glycinexGlycine_and_Serine_Utilization
172039254	AGYTDSQIIGK	ref|NC_010546.1|:4477857-4480148_hypothetical_protein_cce_4341_[Cyanothece_sp._ATCC_51142	si_0720x0.3xProtein_MetabolismxSelenoproteinsxSelenocysteine_metabolism
172039254	ASQVSVELDLDKIPILTGAK	ref|NC_010546.1|:4477857-4480148_hypothetical_protein_cce_4341_[Cyanothece_sp._ATCC_51142	si_0720x0.3xProtein_MetabolismxSelenoproteinsxSelenocysteine_metabolism
172039254	FKDFSVMESQETK	ref|NC_010546.1|:4477857-4480148_hypothetical_protein_cce_4341_[Cyanothece_sp._ATCC_51142	si_0720x0.3xProtein_MetabolismxSelenoproteinsxSelenocysteine_metabolism
172039254	GFILVNDYLQSVSHPNVFAAGDIATMQNYSRPK	ref|NC_010546.1|:4477857-4480148_hypothetical_protein_cce_4341_[Cyanothece_sp._ATCC_51142	si_0720x0.3xProtein_MetabolismxSelenoproteinsxSelenocysteine_metabolism
172039254	IESDFVFLVTQASAPQWIEK	ref|NC_010546.1|:4477857-4480148_hypothetical_protein_cce_4341_[Cyanothece_sp._ATCC_51142	si_0720x0.3xProtein_MetabolismxSelenoproteinsxSelenocysteine_metabolism
172039254	NIENSPNYSLLFDPQTSGGLLASIPEENSDR	ref|NC_010546.1|:4477857-4480148_hypothetical_protein_cce_4341_[Cyanothece_sp._ATCC_51142	si_0720x0.3xProtein_MetabolismxSelenoproteinsxSelenocysteine_metabolism
172039254	NLDNQTYLNVHK	ref|NC_010546.1|:4477857-4480148_hypothetical_protein_cce_4341_[Cyanothece_sp._ATCC_51142	si_0720x0.3xProtein_MetabolismxSelenoproteinsxSelenocysteine_metabolism
172039254	QGQPLFDNLQSIILGNK	ref|NC_010546.1|:4477857-4480148_hypothetical_protein_cce_4341_[Cyanothece_sp._ATCC_51142	si_0720x0.3xProtein_MetabolismxSelenoproteinsxSelenocysteine_metabolism
172039250	ALIEAENALSNANR	ref|NC_010546.1|:c4475857-4473785_hypothetical_protein_cce_4337_[Cyanothece_sp._ATCC_51142	si_0962x1xNo_Function_MatchxNo_Function_MatchxNone
172039250	AQAEAAVITAQEVEK	ref|NC_010546.1|:c4475857-4473785_hypothetical_protein_cce_4337_[Cyanothece_sp._ATCC_51142	si_0962x1xNo_Function_MatchxNo_Function_MatchxNone
172039250	EDANLTQQK	ref|NC_010546.1|:c4475857-4473785_hypothetical_protein_cce_4337_[Cyanothece_sp._ATCC_51142	si_0962x1xNo_Function_MatchxNo_Function_MatchxNone
172039250	EIQETKDKEAAKIEK	ref|NC_010546.1|:c4475857-4473785_hypothetical_protein_cce_4337_[Cyanothece_sp._ATCC_51142	si_0962x1xNo_Function_MatchxNo_Function_MatchxNone
172039250	ELEAEKQSLQIIK	ref|NC_010546.1|:c4475857-4473785_hypothetical_protein_cce_4337_[Cyanothece_sp._ATCC_51142	si_0962x1xNo_Function_MatchxNo_Function_MatchxNone
172039250	FDSEAEKAQAEAAVITAQEVEK	ref|NC_010546.1|:c4475857-4473785_hypothetical_protein_cce_4337_[Cyanothece_sp._ATCC_51142	si_0962x1xNo_Function_MatchxNo_Function_MatchxNone
172039250	IAEIDSDKLGFAEAVLNLIQQDLK	ref|NC_010546.1|:c4475857-4473785_hypothetical_protein_cce_4337_[Cyanothece_sp._ATCC_51142	si_0962x1xNo_Function_MatchxNo_Function_MatchxNone
172039250	IAEIDSDKLGFAEAVLNLIQQDLKK	ref|NC_010546.1|:c4475857-4473785_hypothetical_protein_cce_4337_[Cyanothece_sp._ATCC_51142	si_0962x1xNo_Function_MatchxNo_Function_MatchxNone
172039250	IAQQQAAIAIANK	ref|NC_010546.1|:c4475857-4473785_hypothetical_protein_cce_4337_[Cyanothece_sp._ATCC_51142	si_0962x1xNo_Function_MatchxNo_Function_MatchxNone
172039250	IAQQQAAIAIANKEK	ref|NC_010546.1|:c4475857-4473785_hypothetical_protein_cce_4337_[Cyanothece_sp._ATCC_51142	si_0962x1xNo_Function_MatchxNo_Function_MatchxNone
172039250	IAQQQAAIAIANKEKERFDSEAEKAQAEAAVITAQEVEK	ref|NC_010546.1|:c4475857-4473785_hypothetical_protein_cce_4337_[Cyanothece_sp._ATCC_51142	si_0962x1xNo_Function_MatchxNo_Function_MatchxNone
172039250	ILQEQEVEEEK	ref|NC_010546.1|:c4475857-4473785_hypothetical_protein_cce_4337_[Cyanothece_sp._ATCC_51142	si_0962x1xNo_Function_MatchxNo_Function_MatchxNone
172039250	ILQEQEVEEEKIEK	ref|NC_010546.1|:c4475857-4473785_hypothetical_protein_cce_4337_[Cyanothece_sp._ATCC_51142	si_0962x1xNo_Function_MatchxNo_Function_MatchxNone
172039250	ISENDIKDAIEK	ref|NC_010546.1|:c4475857-4473785_hypothetical_protein_cce_4337_[Cyanothece_sp._ATCC_51142	si_0962x1xNo_Function_MatchxNo_Function_MatchxNone
172039250	ISEQNVVEIDVFR	ref|NC_010546.1|:c4475857-4473785_hypothetical_protein_cce_4337_[Cyanothece_sp._ATCC_51142	si_0962x1xNo_Function_MatchxNo_Function_MatchxNone
172039250	ISEQNVVEIDVFRR	ref|NC_010546.1|:c4475857-4473785_hypothetical_protein_cce_4337_[Cyanothece_sp._ATCC_51142	si_0962x1xNo_Function_MatchxNo_Function_MatchxNone
172039250	KALIEAENALSNANR	ref|NC_010546.1|:c4475857-4473785_hypothetical_protein_cce_4337_[Cyanothece_sp._ATCC_51142	si_0962x1xNo_Function_MatchxNo_Function_MatchxNone
172039250	KIAEIDSDKLGFAEAVLNLIQQDLK	ref|NC_010546.1|:c4475857-4473785_hypothetical_protein_cce_4337_[Cyanothece_sp._ATCC_51142	si_0962x1xNo_Function_MatchxNo_Function_MatchxNone
172039250	KIAEIDSDKLGFAEAVLNLIQQDLKK	ref|NC_010546.1|:c4475857-4473785_hypothetical_protein_cce_4337_[Cyanothece_sp._ATCC_51142	si_0962x1xNo_Function_MatchxNo_Function_MatchxNone
172039250	LGFAEAVLNLIQQDLK	ref|NC_010546.1|:c4475857-4473785_hypothetical_protein_cce_4337_[Cyanothece_sp._ATCC_51142	si_0962x1xNo_Function_MatchxNo_Function_MatchxNone
172039250	LGFAEAVLNLIQQDLKK	ref|NC_010546.1|:c4475857-4473785_hypothetical_protein_cce_4337_[Cyanothece_sp._ATCC_51142	si_0962x1xNo_Function_MatchxNo_Function_MatchxNone
172039250	LGTLINQIK	ref|NC_010546.1|:c4475857-4473785_hypothetical_protein_cce_4337_[Cyanothece_sp._ATCC_51142	si_0962x1xNo_Function_MatchxNo_Function_MatchxNone
172039250	LLAEAESKK	ref|NC_010546.1|:c4475857-4473785_hypothetical_protein_cce_4337_[Cyanothece_sp._ATCC_51142	si_0962x1xNo_Function_MatchxNo_Function_MatchxNone
172039250	LLAEAESKKALIEAENALSNANR	ref|NC_010546.1|:c4475857-4473785_hypothetical_protein_cce_4337_[Cyanothece_sp._ATCC_51142	si_0962x1xNo_Function_MatchxNo_Function_MatchxNone
172039250	LMLSTSGLTLINSLLDEGK	ref|NC_010546.1|:c4475857-4473785_hypothetical_protein_cce_4337_[Cyanothece_sp._ATCC_51142	si_0962x1xNo_Function_MatchxNo_Function_MatchxNone
172039250	LMLSTSGLTLINSLLDEGKLGTLINQIK	ref|NC_010546.1|:c4475857-4473785_hypothetical_protein_cce_4337_[Cyanothece_sp._ATCC_51142	si_0962x1xNo_Function_MatchxNo_Function_MatchxNone
172039250	LVIISAEQEAQK	ref|NC_010546.1|:c4475857-4473785_hypothetical_protein_cce_4337_[Cyanothece_sp._ATCC_51142	si_0962x1xNo_Function_MatchxNo_Function_MatchxNone
172039250	MIQASQLQAQAEVAAAEQQSK	ref|NC_010546.1|:c4475857-4473785_hypothetical_protein_cce_4337_[Cyanothece_sp._ATCC_51142	si_0962x1xNo_Function_MatchxNo_Function_MatchxNone
172039250	QAAELEAESIR	ref|NC_010546.1|:c4475857-4473785_hypothetical_protein_cce_4337_[Cyanothece_sp._ATCC_51142	si_0962x1xNo_Function_MatchxNo_Function_MatchxNone
172039250	TADLIKDLWPELAPQLPYILQSLAPQPGVLGDAK	ref|NC_010546.1|:c4475857-4473785_hypothetical_protein_cce_4337_[Cyanothece_sp._ATCC_51142	si_0962x1xNo_Function_MatchxNo_Function_MatchxNone
172039250	TALNTDGK	ref|NC_010546.1|:c4475857-4473785_hypothetical_protein_cce_4337_[Cyanothece_sp._ATCC_51142	si_0962x1xNo_Function_MatchxNo_Function_MatchxNone
172039250	TALNTDGKVESQEDK	ref|NC_010546.1|:c4475857-4473785_hypothetical_protein_cce_4337_[Cyanothece_sp._ATCC_51142	si_0962x1xNo_Function_MatchxNo_Function_MatchxNone
172039250	VGLTLNNIAISEIEESDTYDENNFFDAQGVR	ref|NC_010546.1|:c4475857-4473785_hypothetical_protein_cce_4337_[Cyanothece_sp._ATCC_51142	si_0962x1xNo_Function_MatchxNo_Function_MatchxNone
172039250	VTQTLQQQETEVAEINR	ref|NC_010546.1|:c4475857-4473785_hypothetical_protein_cce_4337_[Cyanothece_sp._ATCC_51142	si_0962x1xNo_Function_MatchxNo_Function_MatchxNone
172039243	FDELVEAASGEELSDYNLR	ref|NC_010546.1|:4469341-4469787_NADH_dehydrogenase_subunit_O_[Cyanothece_sp._ATCC_51142	si_0812x1xRespirationxElectron_donating_reactionsxRespiratory_Complex_I
172039243	IGSDLEHFVR	ref|NC_010546.1|:4469341-4469787_NADH_dehydrogenase_subunit_O_[Cyanothece_sp._ATCC_51142	si_0812x1xRespirationxElectron_donating_reactionsxRespiratory_Complex_I
172039243	IYAAEVHNSELVESDNMLTLDVDPDNEFNWDEDALQK	ref|NC_010546.1|:4469341-4469787_NADH_dehydrogenase_subunit_O_[Cyanothece_sp._ATCC_51142	si_0812x1xRespirationxElectron_donating_reactionsxRespiratory_Complex_I
172039243	KFDELVEAASGEELSDYNLR	ref|NC_010546.1|:4469341-4469787_NADH_dehydrogenase_subunit_O_[Cyanothece_sp._ATCC_51142	si_0812x1xRespirationxElectron_donating_reactionsxRespiratory_Complex_I
172039243	KFDELVEAASGEELSDYNLRR	ref|NC_010546.1|:4469341-4469787_NADH_dehydrogenase_subunit_O_[Cyanothece_sp._ATCC_51142	si_0812x1xRespirationxElectron_donating_reactionsxRespiratory_Complex_I
172039243	NLLQNGEISYNLK	ref|NC_010546.1|:4469341-4469787_NADH_dehydrogenase_subunit_O_[Cyanothece_sp._ATCC_51142	si_0812x1xRespirationxElectron_donating_reactionsxRespiratory_Complex_I
172039243	VLNYSMGLPK	ref|NC_010546.1|:4469341-4469787_NADH_dehydrogenase_subunit_O_[Cyanothece_sp._ATCC_51142	si_0812x1xRespirationxElectron_donating_reactionsxRespiratory_Complex_I
172039243	VLNYSMGLPKVESPETEGAYNL	ref|NC_010546.1|:4469341-4469787_NADH_dehydrogenase_subunit_O_[Cyanothece_sp._ATCC_51142	si_0812x1xRespirationxElectron_donating_reactionsxRespiratory_Complex_I
172039243	VYRKFDELVEAASGEELSDYNLRR	ref|NC_010546.1|:4469341-4469787_NADH_dehydrogenase_subunit_O_[Cyanothece_sp._ATCC_51142	si_0812x1xRespirationxElectron_donating_reactionsxRespiratory_Complex_I
172039242	DISPHRLEEIAEFFR	ref|NC_010546.1|:4468741-4469301_inorganic_pyrophosphatase_[Cyanothece_sp._ATCC_51142	si_0568x0.5xMiscellaneousxPlant-Prokaryote_DOE_projectxIojap
172039242	DMNAFALDR	ref|NC_010546.1|:4468741-4469301_inorganic_pyrophosphatase_[Cyanothece_sp._ATCC_51142	si_0568x0.5xMiscellaneousxPlant-Prokaryote_DOE_projectxIojap
172039242	GLINVLIEIPAGSK	ref|NC_010546.1|:4468741-4469301_inorganic_pyrophosphatase_[Cyanothece_sp._ATCC_51142	si_0568x0.5xMiscellaneousxPlant-Prokaryote_DOE_projectxIojap
172039242	KKTDILGWKDVDAVTSLVEECVK	ref|NC_010546.1|:4468741-4469301_inorganic_pyrophosphatase_[Cyanothece_sp._ATCC_51142	si_0568x0.5xMiscellaneousxPlant-Prokaryote_DOE_projectxIojap
172039242	KTDILGWKDVDAVTSLVEECVK	ref|NC_010546.1|:4468741-4469301_inorganic_pyrophosphatase_[Cyanothece_sp._ATCC_51142	si_0568x0.5xMiscellaneousxPlant-Prokaryote_DOE_projectxIojap
172039242	LEEIAEFFR	ref|NC_010546.1|:4468741-4469301_inorganic_pyrophosphatase_[Cyanothece_sp._ATCC_51142	si_0568x0.5xMiscellaneousxPlant-Prokaryote_DOE_projectxIojap
172039242	NKYEYDKDMNAFALDR	ref|NC_010546.1|:4468741-4469301_inorganic_pyrophosphatase_[Cyanothece_sp._ATCC_51142	si_0568x0.5xMiscellaneousxPlant-Prokaryote_DOE_projectxIojap
172039242	NKYEYDKDMNAFALDRVLYASVK	ref|NC_010546.1|:4468741-4469301_inorganic_pyrophosphatase_[Cyanothece_sp._ATCC_51142	si_0568x0.5xMiscellaneousxPlant-Prokaryote_DOE_projectxIojap
172039242	PGLINVLIEIPAGSK	ref|NC_010546.1|:4468741-4469301_inorganic_pyrophosphatase_[Cyanothece_sp._ATCC_51142	si_0568x0.5xMiscellaneousxPlant-Prokaryote_DOE_projectxIojap
172039242	PIGMLEMIDGGDRDEK	ref|NC_010546.1|:4468741-4469301_inorganic_pyrophosphatase_[Cyanothece_sp._ATCC_51142	si_0568x0.5xMiscellaneousxPlant-Prokaryote_DOE_projectxIojap
172039242	RLEEIAEFFR	ref|NC_010546.1|:4468741-4469301_inorganic_pyrophosphatase_[Cyanothece_sp._ATCC_51142	si_0568x0.5xMiscellaneousxPlant-Prokaryote_DOE_projectxIojap
172039242	YAEVHSLK	ref|NC_010546.1|:4468741-4469301_inorganic_pyrophosphatase_[Cyanothece_sp._ATCC_51142	si_0568x0.5xMiscellaneousxPlant-Prokaryote_DOE_projectxIojap
172039242	YAEVHSLKDISP	ref|NC_010546.1|:4468741-4469301_inorganic_pyrophosphatase_[Cyanothece_sp._ATCC_51142	si_0568x0.5xMiscellaneousxPlant-Prokaryote_DOE_projectxIojap
172039238	AGIIYPVVVR	ref|NC_010546.1|:c4465227-4464976_photosystem_I_reaction_center_subunit_IV_[Cyanothece_sp._ATCC_51142	si_0643x1xPhotosynthesisxElectron_transport_and_photophosphorylationxPhotosystem_I
172039238	DIGTVATVDK	ref|NC_010546.1|:c4465227-4464976_photosystem_I_reaction_center_subunit_IV_[Cyanothece_sp._ATCC_51142	si_0643x1xPhotosynthesisxElectron_transport_and_photophosphorylationxPhotosystem_I
172039238	ESYWYNDIGTVATVDK	ref|NC_010546.1|:c4465227-4464976_photosystem_I_reaction_center_subunit_IV_[Cyanothece_sp._ATCC_51142	si_0643x1xPhotosynthesisxElectron_transport_and_photophosphorylationxPhotosystem_I
172039238	ESYWYNDIGTVATVDKAGIIYP	ref|NC_010546.1|:c4465227-4464976_photosystem_I_reaction_center_subunit_IV_[Cyanothece_sp._ATCC_51142	si_0643x1xPhotosynthesisxElectron_transport_and_photophosphorylationxPhotosystem_I
172039238	ESYWYNDIGTVATVDKAGIIYPVVVR	ref|NC_010546.1|:c4465227-4464976_photosystem_I_reaction_center_subunit_IV_[Cyanothece_sp._ATCC_51142	si_0643x1xPhotosynthesisxElectron_transport_and_photophosphorylationxPhotosystem_I
172039238	ESYWYNDIGTVATVDKAGIIYPVVVRFDK	ref|NC_010546.1|:c4465227-4464976_photosystem_I_reaction_center_subunit_IV_[Cyanothece_sp._ATCC_51142	si_0643x1xPhotosynthesisxElectron_transport_and_photophosphorylationxPhotosystem_I
172039238	FAESELEVVASK	ref|NC_010546.1|:c4465227-4464976_photosystem_I_reaction_center_subunit_IV_[Cyanothece_sp._ATCC_51142	si_0643x1xPhotosynthesisxElectron_transport_and_photophosphorylationxPhotosystem_I
172039238	FDKVNYNGYSGSATGVNTNNFAESELEVVASK	ref|NC_010546.1|:c4465227-4464976_photosystem_I_reaction_center_subunit_IV_[Cyanothece_sp._ATCC_51142	si_0643x1xPhotosynthesisxElectron_transport_and_photophosphorylationxPhotosystem_I
172039238	GYSGSATGVNTNNFAESELEVVASK	ref|NC_010546.1|:c4465227-4464976_photosystem_I_reaction_center_subunit_IV_[Cyanothece_sp._ATCC_51142	si_0643x1xPhotosynthesisxElectron_transport_and_photophosphorylationxPhotosystem_I
172039238	KESYWYNDIGTVATVDK	ref|NC_010546.1|:c4465227-4464976_photosystem_I_reaction_center_subunit_IV_[Cyanothece_sp._ATCC_51142	si_0643x1xPhotosynthesisxElectron_transport_and_photophosphorylationxPhotosystem_I
172039238	KESYWYNDIGTVATVDKAGIIYPVVVR	ref|NC_010546.1|:c4465227-4464976_photosystem_I_reaction_center_subunit_IV_[Cyanothece_sp._ATCC_51142	si_0643x1xPhotosynthesisxElectron_transport_and_photophosphorylationxPhotosystem_I
172039238	NFAESELEVVASK	ref|NC_010546.1|:c4465227-4464976_photosystem_I_reaction_center_subunit_IV_[Cyanothece_sp._ATCC_51142	si_0643x1xPhotosynthesisxElectron_transport_and_photophosphorylationxPhotosystem_I
172039238	RKESYWYNDIGTVATVDK	ref|NC_010546.1|:c4465227-4464976_photosystem_I_reaction_center_subunit_IV_[Cyanothece_sp._ATCC_51142	si_0643x1xPhotosynthesisxElectron_transport_and_photophosphorylationxPhotosystem_I
172039238	RKESYWYNDIGTVATVDKAGIIYPVVVR	ref|NC_010546.1|:c4465227-4464976_photosystem_I_reaction_center_subunit_IV_[Cyanothece_sp._ATCC_51142	si_0643x1xPhotosynthesisxElectron_transport_and_photophosphorylationxPhotosystem_I
172039238	TNNFAESELEVVASK	ref|NC_010546.1|:c4465227-4464976_photosystem_I_reaction_center_subunit_IV_[Cyanothece_sp._ATCC_51142	si_0643x1xPhotosynthesisxElectron_transport_and_photophosphorylationxPhotosystem_I
172039238	VNYNGYSGSATGVNTNNFAESELEVVASK	ref|NC_010546.1|:c4465227-4464976_photosystem_I_reaction_center_subunit_IV_[Cyanothece_sp._ATCC_51142	si_0643x1xPhotosynthesisxElectron_transport_and_photophosphorylationxPhotosystem_I
172039227	AGVIFNQEELR	ref|NC_010546.1|:c4449993-4448740_bifunctional_ornithine_acetyltransferase/N-acetylglutamate_synthase_protein_[Cyanothece_sp._ATCC_51142	si_0006x1xAmino_Acids_and_DerivativesxArginine;_urea_cycle,_polyaminesxArginine_Biosynthesis_extended
172039227	AIITTDLVTK	ref|NC_010546.1|:c4449993-4448740_bifunctional_ornithine_acetyltransferase/N-acetylglutamate_synthase_protein_[Cyanothece_sp._ATCC_51142	si_0006x1xAmino_Acids_and_DerivativesxArginine;_urea_cycle,_polyaminesxArginine_Biosynthesis_extended
172039227	AIITTDLVTKEIALETMIDNRPVR	ref|NC_010546.1|:c4449993-4448740_bifunctional_ornithine_acetyltransferase/N-acetylglutamate_synthase_protein_[Cyanothece_sp._ATCC_51142	si_0006x1xAmino_Acids_and_DerivativesxArginine;_urea_cycle,_polyaminesxArginine_Biosynthesis_extended
172039227	ASGIAAGLKPSGNPDLALIVSDVEAIAAGVFTTSQVR	ref|NC_010546.1|:c4449993-4448740_bifunctional_ornithine_acetyltransferase/N-acetylglutamate_synthase_protein_[Cyanothece_sp._ATCC_51142	si_0006x1xAmino_Acids_and_DerivativesxArginine;_urea_cycle,_polyaminesxArginine_Biosynthesis_extended
172039227	EIALETMIDNRPVR	ref|NC_010546.1|:c4449993-4448740_bifunctional_ornithine_acetyltransferase/N-acetylglutamate_synthase_protein_[Cyanothece_sp._ATCC_51142	si_0006x1xAmino_Acids_and_DerivativesxArginine;_urea_cycle,_polyaminesxArginine_Biosynthesis_extended
172039227	EIALETMIDNRPVRVGGIAK	ref|NC_010546.1|:c4449993-4448740_bifunctional_ornithine_acetyltransferase/N-acetylglutamate_synthase_protein_[Cyanothece_sp._ATCC_51142	si_0006x1xAmino_Acids_and_DerivativesxArginine;_urea_cycle,_polyaminesxArginine_Biosynthesis_extended
172039227	IVLGEYVMMENGQPLQYDR	ref|NC_010546.1|:c4449993-4448740_bifunctional_ornithine_acetyltransferase/N-acetylglutamate_synthase_protein_[Cyanothece_sp._ATCC_51142	si_0006x1xAmino_Acids_and_DerivativesxArginine;_urea_cycle,_polyaminesxArginine_Biosynthesis_extended
172039227	KEIALETMIDNRPVR	ref|NC_010546.1|:c4449993-4448740_bifunctional_ornithine_acetyltransferase/N-acetylglutamate_synthase_protein_[Cyanothece_sp._ATCC_51142	si_0006x1xAmino_Acids_and_DerivativesxArginine;_urea_cycle,_polyaminesxArginine_Biosynthesis_extended
172039227	MENYSTIAGGITAPK	ref|NC_010546.1|:c4449993-4448740_bifunctional_ornithine_acetyltransferase/N-acetylglutamate_synthase_protein_[Cyanothece_sp._ATCC_51142	si_0006x1xAmino_Acids_and_DerivativesxArginine;_urea_cycle,_polyaminesxArginine_Biosynthesis_extended
172039227	QALNIAPEAVLLASTGVIGQR	ref|NC_010546.1|:c4449993-4448740_bifunctional_ornithine_acetyltransferase/N-acetylglutamate_synthase_protein_[Cyanothece_sp._ATCC_51142	si_0006x1xAmino_Acids_and_DerivativesxArginine;_urea_cycle,_polyaminesxArginine_Biosynthesis_extended
172039227	SAASNYMK	ref|NC_010546.1|:c4449993-4448740_bifunctional_ornithine_acetyltransferase/N-acetylglutamate_synthase_protein_[Cyanothece_sp._ATCC_51142	si_0006x1xAmino_Acids_and_DerivativesxArginine;_urea_cycle,_polyaminesxArginine_Biosynthesis_extended
172039227	SAIFGRDPNWGR	ref|NC_010546.1|:c4449993-4448740_bifunctional_ornithine_acetyltransferase/N-acetylglutamate_synthase_protein_[Cyanothece_sp._ATCC_51142	si_0006x1xAmino_Acids_and_DerivativesxArginine;_urea_cycle,_polyaminesxArginine_Biosynthesis_extended
172039227	SGIPQLVANLSEDGNDAAAK	ref|NC_010546.1|:c4449993-4448740_bifunctional_ornithine_acetyltransferase/N-acetylglutamate_synthase_protein_[Cyanothece_sp._ATCC_51142	si_0006x1xAmino_Acids_and_DerivativesxArginine;_urea_cycle,_polyaminesxArginine_Biosynthesis_extended
172039227	TPAITDMNSK	ref|NC_010546.1|:c4449993-4448740_bifunctional_ornithine_acetyltransferase/N-acetylglutamate_synthase_protein_[Cyanothece_sp._ATCC_51142	si_0006x1xAmino_Acids_and_DerivativesxArginine;_urea_cycle,_polyaminesxArginine_Biosynthesis_extended
172039220	DNGEVFDLAAVDILR	ref|NC_010546.1|:4436056-4437897_putative_haem_peroxidase_[Cyanothece_sp._ATCC_51142	si_0062x0.3xCarbohydratesxCO2_fixationxPhotorespiration_(oxidative_C2_cycle)
172039220	DNGEVFDLAAVDILRDRER	ref|NC_010546.1|:4436056-4437897_putative_haem_peroxidase_[Cyanothece_sp._ATCC_51142	si_0062x0.3xCarbohydratesxCO2_fixationxPhotorespiration_(oxidative_C2_cycle)
172039220	FLQQLVRDNGEVFDLAAVDILR	ref|NC_010546.1|:4436056-4437897_putative_haem_peroxidase_[Cyanothece_sp._ATCC_51142	si_0062x0.3xCarbohydratesxCO2_fixationxPhotorespiration_(oxidative_C2_cycle)
172039220	HFPQLSPVLYGVDNAFKPWR	ref|NC_010546.1|:4436056-4437897_putative_haem_peroxidase_[Cyanothece_sp._ATCC_51142	si_0062x0.3xCarbohydratesxCO2_fixationxPhotorespiration_(oxidative_C2_cycle)
172039220	LPTPLALIK	ref|NC_010546.1|:4436056-4437897_putative_haem_peroxidase_[Cyanothece_sp._ATCC_51142	si_0062x0.3xCarbohydratesxCO2_fixationxPhotorespiration_(oxidative_C2_cycle)
172039220	MHPLIPDELEFR	ref|NC_010546.1|:4436056-4437897_putative_haem_peroxidase_[Cyanothece_sp._ATCC_51142	si_0062x0.3xCarbohydratesxCO2_fixationxPhotorespiration_(oxidative_C2_cycle)
172039220	NIPLTAIQPETPQQLMTPNPR	ref|NC_010546.1|:4436056-4437897_putative_haem_peroxidase_[Cyanothece_sp._ATCC_51142	si_0062x0.3xCarbohydratesxCO2_fixationxPhotorespiration_(oxidative_C2_cycle)
172039220	NLHDTSQLPDK	ref|NC_010546.1|:4436056-4437897_putative_haem_peroxidase_[Cyanothece_sp._ATCC_51142	si_0062x0.3xCarbohydratesxCO2_fixationxPhotorespiration_(oxidative_C2_cycle)
172039220	QVLGTVGEGEIADLLTGIIGSDK	ref|NC_010546.1|:4436056-4437897_putative_haem_peroxidase_[Cyanothece_sp._ATCC_51142	si_0062x0.3xCarbohydratesxCO2_fixationxPhotorespiration_(oxidative_C2_cycle)
172039220	SLEGDKFLQEVNFFEMSGK	ref|NC_010546.1|:4436056-4437897_putative_haem_peroxidase_[Cyanothece_sp._ATCC_51142	si_0062x0.3xCarbohydratesxCO2_fixationxPhotorespiration_(oxidative_C2_cycle)
172039220	SLEGDKFLQEVNFFEMSGKR	ref|NC_010546.1|:4436056-4437897_putative_haem_peroxidase_[Cyanothece_sp._ATCC_51142	si_0062x0.3xCarbohydratesxCO2_fixationxPhotorespiration_(oxidative_C2_cycle)
172039220	TADGSFNDLEHPEMGMAGTR	ref|NC_010546.1|:4436056-4437897_putative_haem_peroxidase_[Cyanothece_sp._ATCC_51142	si_0062x0.3xCarbohydratesxCO2_fixationxPhotorespiration_(oxidative_C2_cycle)
172039220	TLPDTSRPEGAKPPTFINTVTHWWDGSQIYGSNPETVDQLR	ref|NC_010546.1|:4436056-4437897_putative_haem_peroxidase_[Cyanothece_sp._ATCC_51142	si_0062x0.3xCarbohydratesxCO2_fixationxPhotorespiration_(oxidative_C2_cycle)
172039219	DRLQGTLISSQQNA	ref|NC_010546.1|:4434528-4436006_hypothetical_protein_cce_4306_[Cyanothece_sp._ATCC_51142	si_0962x1xNo_Function_MatchxNo_Function_MatchxNone
172039219	ILKNPSGTSATDQIIR	ref|NC_010546.1|:4434528-4436006_hypothetical_protein_cce_4306_[Cyanothece_sp._ATCC_51142	si_0962x1xNo_Function_MatchxNo_Function_MatchxNone
172039219	MVTPQGKPIEINEEQPELLR	ref|NC_010546.1|:4434528-4436006_hypothetical_protein_cce_4306_[Cyanothece_sp._ATCC_51142	si_0962x1xNo_Function_MatchxNo_Function_MatchxNone
172039219	NPSGTSATDQIIR	ref|NC_010546.1|:4434528-4436006_hypothetical_protein_cce_4306_[Cyanothece_sp._ATCC_51142	si_0962x1xNo_Function_MatchxNo_Function_MatchxNone
172039219	SSYGLLGIVYEVTFK	ref|NC_010546.1|:4434528-4436006_hypothetical_protein_cce_4306_[Cyanothece_sp._ATCC_51142	si_0962x1xNo_Function_MatchxNo_Function_MatchxNone
172039219	TLDDLILIIR	ref|NC_010546.1|:4434528-4436006_hypothetical_protein_cce_4306_[Cyanothece_sp._ATCC_51142	si_0962x1xNo_Function_MatchxNo_Function_MatchxNone
172039219	TVTVQAGALYLDVAEELRK	ref|NC_010546.1|:4434528-4436006_hypothetical_protein_cce_4306_[Cyanothece_sp._ATCC_51142	si_0962x1xNo_Function_MatchxNo_Function_MatchxNone
172039218	SIVAQAAIEAGADIVNDISGGSFDEK	ref|NC_010546.1|:4433247-4434095_dihydropteroate_synthase_[Cyanothece_sp._ATCC_51142	si_0291x0.2xClustering-based_subsystemsxUnclassified_clustering-based_subsystemsxCBSS-235.1.peg.567
172039218	TMIHGGADIIDIGGQSTRPGAEEITLEEELKR	ref|NC_010546.1|:4433247-4434095_dihydropteroate_synthase_[Cyanothece_sp._ATCC_51142	si_0291x0.2xClustering-based_subsystemsxUnclassified_clustering-based_subsystemsxCBSS-235.1.peg.567
172039218	VHDVAEMKDVVQVADEIWRK	ref|NC_010546.1|:4433247-4434095_dihydropteroate_synthase_[Cyanothece_sp._ATCC_51142	si_0291x0.2xClustering-based_subsystemsxUnclassified_clustering-based_subsystemsxCBSS-235.1.peg.567
172039217	DAGEAESVIINQLQK	ref|NC_010546.1|:4432449-4433186_triosephosphate_isomerase_[Cyanothece_sp._ATCC_51142	si_0060x0.1xCarbohydratesxCO2_fixationxCalvin-Benson_cycle
172039217	EQRDAGEAESVIINQLQK	ref|NC_010546.1|:4432449-4433186_triosephosphate_isomerase_[Cyanothece_sp._ATCC_51142	si_0060x0.1xCarbohydratesxCO2_fixationxCalvin-Benson_cycle
172039217	LGAQNIHWEDKGAYTGEISGPMLTELSVDYVVIGHSERR	ref|NC_010546.1|:4432449-4433186_triosephosphate_isomerase_[Cyanothece_sp._ATCC_51142	si_0060x0.1xCarbohydratesxCO2_fixationxCalvin-Benson_cycle
172039217	NVTIQYGGSVKPNNIDEIMAQSDIDGALVGGASLDPVSFAR	ref|NC_010546.1|:4432449-4433186_triosephosphate_isomerase_[Cyanothece_sp._ATCC_51142	si_0060x0.1xCarbohydratesxCO2_fixationxCalvin-Benson_cycle
172039217	QYFGETDKTANLR	ref|NC_010546.1|:4432449-4433186_triosephosphate_isomerase_[Cyanothece_sp._ATCC_51142	si_0060x0.1xCarbohydratesxCO2_fixationxCalvin-Benson_cycle
172039217	TQGEALEFLTVLK	ref|NC_010546.1|:4432449-4433186_triosephosphate_isomerase_[Cyanothece_sp._ATCC_51142	si_0060x0.1xCarbohydratesxCO2_fixationxCalvin-Benson_cycle
172039212	IVTQIYDSTTTQLTTLLR	ref|NC_010546.1|:c4426159-4424573_NAD(P)H-quinone_oxidoreductase_subunit_4_[Cyanothece_sp._ATCC_51142	si_0059x0.2xCarbohydratesxCO2_fixationxCO2_uptake,_carboxysome
172039209	QLFTITNLPIGRVKKYLKHKK	ref|NC_010546.1|:4422654-4423661_hypothetical_protein_cce_4296_[Cyanothece_sp._ATCC_51142	si_0365x1xCofactors,_Vitamins,_Prosthetic_Groups,_PigmentsxFolate_and_pterinesxMolybdenum_cofactor_biosynthesis
172039207	LKLVSDIDRYSQLQEFLK	ref|NC_010546.1|:c4421254-4420646_hypothetical_protein_cce_4294_[Cyanothece_sp._ATCC_51142	si_0962x1xNo_Function_MatchxNo_Function_MatchxNone
172039207	LVSDIDRYSQLQEFLK	ref|NC_010546.1|:c4421254-4420646_hypothetical_protein_cce_4294_[Cyanothece_sp._ATCC_51142	si_0962x1xNo_Function_MatchxNo_Function_MatchxNone
172039207	TESVTPENNSDLSAILSEVQFLK	ref|NC_010546.1|:c4421254-4420646_hypothetical_protein_cce_4294_[Cyanothece_sp._ATCC_51142	si_0962x1xNo_Function_MatchxNo_Function_MatchxNone
172039204	AAGVEKPNEILAILTQSSR	ref|NC_010546.1|:c4419683-4417935_protease_[Cyanothece_sp._ATCC_51142	si_0297x0.3xClustering-based_subsystemsxUnclassified_clustering-based_subsystemsxCBSS-269801.1.peg.1715
172039204	ETPNDPDYSK	ref|NC_010546.1|:c4419683-4417935_protease_[Cyanothece_sp._ATCC_51142	si_0297x0.3xClustering-based_subsystemsxUnclassified_clustering-based_subsystemsxCBSS-269801.1.peg.1715
172039204	KANYSNYGAGVDISAPGGSESGK	ref|NC_010546.1|:c4419683-4417935_protease_[Cyanothece_sp._ATCC_51142	si_0297x0.3xClustering-based_subsystemsxUnclassified_clustering-based_subsystemsxCBSS-269801.1.peg.1715
172039204	VISVSALDAAGK	ref|NC_010546.1|:c4419683-4417935_protease_[Cyanothece_sp._ATCC_51142	si_0297x0.3xClustering-based_subsystemsxUnclassified_clustering-based_subsystemsxCBSS-269801.1.peg.1715
172039204	VISVSALDAAGKK	ref|NC_010546.1|:c4419683-4417935_protease_[Cyanothece_sp._ATCC_51142	si_0297x0.3xClustering-based_subsystemsxUnclassified_clustering-based_subsystemsxCBSS-269801.1.peg.1715
172039203	LAALVPENEQYQEILK	ref|NC_010546.1|:4417141-4417701_hypothetical_protein_cce_4290_[Cyanothece_sp._ATCC_51142	si_0582x1xMotility_and_ChemotaxisxFlagellar_motility_in_ProkaryotaxFlagellum
172039203	QTPSSSPEANSEAVSPEER	ref|NC_010546.1|:4417141-4417701_hypothetical_protein_cce_4290_[Cyanothece_sp._ATCC_51142	si_0582x1xMotility_and_ChemotaxisxFlagellar_motility_in_ProkaryotaxFlagellum
172039196	AVVEAADAMVK	ref|NC_010546.1|:c4410328-4410017_carbon_dioxide_concentrating_mechanism_protein_[Cyanothece_sp._ATCC_51142	si_0059x0.3xCarbohydratesxCO2_fixationxCO2_uptake,_carboxysome
172039196	ETKGFPAVVEAADAMVKAAR	ref|NC_010546.1|:c4410328-4410017_carbon_dioxide_concentrating_mechanism_protein_[Cyanothece_sp._ATCC_51142	si_0059x0.3xCarbohydratesxCO2_fixationxCO2_uptake,_carboxysome
172039196	GDVSEVQASVSAGIDAANR	ref|NC_010546.1|:c4410328-4410017_carbon_dioxide_concentrating_mechanism_protein_[Cyanothece_sp._ATCC_51142	si_0059x0.3xCarbohydratesxCO2_fixationxCO2_uptake,_carboxysome
172039196	GDVSEVQASVSAGIDAANRVNGGEVLSTHIIARPHENLEYVLPIR	ref|NC_010546.1|:c4410328-4410017_carbon_dioxide_concentrating_mechanism_protein_[Cyanothece_sp._ATCC_51142	si_0059x0.3xCarbohydratesxCO2_fixationxCO2_uptake,_carboxysome
172039196	GFPAVVEAADAMVK	ref|NC_010546.1|:c4410328-4410017_carbon_dioxide_concentrating_mechanism_protein_[Cyanothece_sp._ATCC_51142	si_0059x0.3xCarbohydratesxCO2_fixationxCO2_uptake,_carboxysome
172039196	GFPAVVEAADAMVKAAR	ref|NC_010546.1|:c4410328-4410017_carbon_dioxide_concentrating_mechanism_protein_[Cyanothece_sp._ATCC_51142	si_0059x0.3xCarbohydratesxCO2_fixationxCO2_uptake,_carboxysome
172039196	HENLEYVLPIR	ref|NC_010546.1|:c4410328-4410017_carbon_dioxide_concentrating_mechanism_protein_[Cyanothece_sp._ATCC_51142	si_0059x0.3xCarbohydratesxCO2_fixationxCO2_uptake,_carboxysome
172039196	PAVVEAADAMVK	ref|NC_010546.1|:c4410328-4410017_carbon_dioxide_concentrating_mechanism_protein_[Cyanothece_sp._ATCC_51142	si_0059x0.3xCarbohydratesxCO2_fixationxCO2_uptake,_carboxysome
172039196	PHENLEYVLPIR	ref|NC_010546.1|:c4410328-4410017_carbon_dioxide_concentrating_mechanism_protein_[Cyanothece_sp._ATCC_51142	si_0059x0.3xCarbohydratesxCO2_fixationxCO2_uptake,_carboxysome
172039196	PHENLEYVLPIRYTEEVEQFRAY	ref|NC_010546.1|:c4410328-4410017_carbon_dioxide_concentrating_mechanism_protein_[Cyanothece_sp._ATCC_51142	si_0059x0.3xCarbohydratesxCO2_fixationxCO2_uptake,_carboxysome
172039196	PIAVGMIETK	ref|NC_010546.1|:c4410328-4410017_carbon_dioxide_concentrating_mechanism_protein_[Cyanothece_sp._ATCC_51142	si_0059x0.3xCarbohydratesxCO2_fixationxCO2_uptake,_carboxysome
172039196	PIAVGMIETKGFPAVVEAADAMVK	ref|NC_010546.1|:c4410328-4410017_carbon_dioxide_concentrating_mechanism_protein_[Cyanothece_sp._ATCC_51142	si_0059x0.3xCarbohydratesxCO2_fixationxCO2_uptake,_carboxysome
172039196	PIAVGMIETKGFPAVVEAADAMVKAAR	ref|NC_010546.1|:c4410328-4410017_carbon_dioxide_concentrating_mechanism_protein_[Cyanothece_sp._ATCC_51142	si_0059x0.3xCarbohydratesxCO2_fixationxCO2_uptake,_carboxysome
172039196	VNGGEVLSTHIIAR	ref|NC_010546.1|:c4410328-4410017_carbon_dioxide_concentrating_mechanism_protein_[Cyanothece_sp._ATCC_51142	si_0059x0.3xCarbohydratesxCO2_fixationxCO2_uptake,_carboxysome
172039196	VNGGEVLSTHIIARP	ref|NC_010546.1|:c4410328-4410017_carbon_dioxide_concentrating_mechanism_protein_[Cyanothece_sp._ATCC_51142	si_0059x0.3xCarbohydratesxCO2_fixationxCO2_uptake,_carboxysome
172039196	VNGGEVLSTHIIARPHENLEYVLPIR	ref|NC_010546.1|:c4410328-4410017_carbon_dioxide_concentrating_mechanism_protein_[Cyanothece_sp._ATCC_51142	si_0059x0.3xCarbohydratesxCO2_fixationxCO2_uptake,_carboxysome
172039196	VTLVGYEK	ref|NC_010546.1|:c4410328-4410017_carbon_dioxide_concentrating_mechanism_protein_[Cyanothece_sp._ATCC_51142	si_0059x0.3xCarbohydratesxCO2_fixationxCO2_uptake,_carboxysome
172039196	VTLVGYEKIGSGR	ref|NC_010546.1|:c4410328-4410017_carbon_dioxide_concentrating_mechanism_protein_[Cyanothece_sp._ATCC_51142	si_0059x0.3xCarbohydratesxCO2_fixationxCO2_uptake,_carboxysome
172039196	YTEEVEQFR	ref|NC_010546.1|:c4410328-4410017_carbon_dioxide_concentrating_mechanism_protein_[Cyanothece_sp._ATCC_51142	si_0059x0.3xCarbohydratesxCO2_fixationxCO2_uptake,_carboxysome
172039196	YTEEVEQFRAY	ref|NC_010546.1|:c4410328-4410017_carbon_dioxide_concentrating_mechanism_protein_[Cyanothece_sp._ATCC_51142	si_0059x0.3xCarbohydratesxCO2_fixationxCO2_uptake,_carboxysome
172039195	GDVSEVQASVSAGIDNAGR	ref|NC_010546.1|:c4409954-4409619_carbon_dioxide_concentrating_mechanism_protein_[Cyanothece_sp._ATCC_51142	si_0059x0.3xCarbohydratesxCO2_fixationxCO2_uptake,_carboxysome
172039195	GDVSEVQASVSAGIDNAGRVNGGQVLSTHIIARPHENLEYVLPIR	ref|NC_010546.1|:c4409954-4409619_carbon_dioxide_concentrating_mechanism_protein_[Cyanothece_sp._ATCC_51142	si_0059x0.3xCarbohydratesxCO2_fixationxCO2_uptake,_carboxysome
172039195	SIAVGMVETLGFPAVVEAADAMVK	ref|NC_010546.1|:c4409954-4409619_carbon_dioxide_concentrating_mechanism_protein_[Cyanothece_sp._ATCC_51142	si_0059x0.3xCarbohydratesxCO2_fixationxCO2_uptake,_carboxysome
172039195	SIAVGMVETLGFPAVVEAADAMVKAAR	ref|NC_010546.1|:c4409954-4409619_carbon_dioxide_concentrating_mechanism_protein_[Cyanothece_sp._ATCC_51142	si_0059x0.3xCarbohydratesxCO2_fixationxCO2_uptake,_carboxysome
172039195	VNGGQVLSTHIIAR	ref|NC_010546.1|:c4409954-4409619_carbon_dioxide_concentrating_mechanism_protein_[Cyanothece_sp._ATCC_51142	si_0059x0.3xCarbohydratesxCO2_fixationxCO2_uptake,_carboxysome
172039195	VNGGQVLSTHIIARP	ref|NC_010546.1|:c4409954-4409619_carbon_dioxide_concentrating_mechanism_protein_[Cyanothece_sp._ATCC_51142	si_0059x0.3xCarbohydratesxCO2_fixationxCO2_uptake,_carboxysome
172039195	VNGGQVLSTHIIARPHENLEYVLPIR	ref|NC_010546.1|:c4409954-4409619_carbon_dioxide_concentrating_mechanism_protein_[Cyanothece_sp._ATCC_51142	si_0059x0.3xCarbohydratesxCO2_fixationxCO2_uptake,_carboxysome
172039195	YTEAVEQFR	ref|NC_010546.1|:c4409954-4409619_carbon_dioxide_concentrating_mechanism_protein_[Cyanothece_sp._ATCC_51142	si_0059x0.3xCarbohydratesxCO2_fixationxCO2_uptake,_carboxysome
172039195	YTEAVEQFRESVNPPLR	ref|NC_010546.1|:c4409954-4409619_carbon_dioxide_concentrating_mechanism_protein_[Cyanothece_sp._ATCC_51142	si_0059x0.3xCarbohydratesxCO2_fixationxCO2_uptake,_carboxysome
172039195	YTEAVEQFRESVNPPLRR	ref|NC_010546.1|:c4409954-4409619_carbon_dioxide_concentrating_mechanism_protein_[Cyanothece_sp._ATCC_51142	si_0059x0.3xCarbohydratesxCO2_fixationxCO2_uptake,_carboxysome
172039194	GTVVSTHK	ref|NC_010546.1|:c4409599-4409294_carbon_dioxide_concentrating_mechanism_protein_[Cyanothece_sp._ATCC_51142	si_0059x0.5xCarbohydratesxCO2_fixationxCO2_uptake,_carboxysome
172039194	IDDGMEHRPLDALVVGIIDTVTVENNR	ref|NC_010546.1|:c4409599-4409294_carbon_dioxide_concentrating_mechanism_protein_[Cyanothece_sp._ATCC_51142	si_0059x0.5xCarbohydratesxCO2_fixationxCO2_uptake,_carboxysome
172039194	LLLLQFMDAQGQPLPK	ref|NC_010546.1|:c4409599-4409294_carbon_dioxide_concentrating_mechanism_protein_[Cyanothece_sp._ATCC_51142	si_0059x0.5xCarbohydratesxCO2_fixationxCO2_uptake,_carboxysome
172039194	MDAQGQPLPK	ref|NC_010546.1|:c4409599-4409294_carbon_dioxide_concentrating_mechanism_protein_[Cyanothece_sp._ATCC_51142	si_0059x0.5xCarbohydratesxCO2_fixationxCO2_uptake,_carboxysome
172039194	YEVAGDLVGAGVNEWVLVSR	ref|NC_010546.1|:c4409599-4409294_carbon_dioxide_concentrating_mechanism_protein_[Cyanothece_sp._ATCC_51142	si_0059x0.5xCarbohydratesxCO2_fixationxCO2_uptake,_carboxysome
172039193	AAPPTPWSQTLAEPK	ref|NC_010546.1|:c4409231-4407231_carbon_dioxide_concentrating_mechanism_protein_[Cyanothece_sp._ATCC_51142	si_0059x0.3xCarbohydratesxCO2_fixationxCO2_uptake,_carboxysome
172039193	AASNGNGKVGDDVASQVR	ref|NC_010546.1|:c4409231-4407231_carbon_dioxide_concentrating_mechanism_protein_[Cyanothece_sp._ATCC_51142	si_0059x0.3xCarbohydratesxCO2_fixationxCO2_uptake,_carboxysome
172039193	ADEGTPFYIGEGTNIQDGVVIHGLEK	ref|NC_010546.1|:c4409231-4407231_carbon_dioxide_concentrating_mechanism_protein_[Cyanothece_sp._ATCC_51142	si_0059x0.3xCarbohydratesxCO2_fixationxCO2_uptake,_carboxysome
172039193	ADQVLADLEAFLQEHQGEYVR	ref|NC_010546.1|:c4409231-4407231_carbon_dioxide_concentrating_mechanism_protein_[Cyanothece_sp._ATCC_51142	si_0059x0.3xCarbohydratesxCO2_fixationxCO2_uptake,_carboxysome
172039193	ALLHQGLTISTEYATSR	ref|NC_010546.1|:c4409231-4407231_carbon_dioxide_concentrating_mechanism_protein_[Cyanothece_sp._ATCC_51142	si_0059x0.3xCarbohydratesxCO2_fixationxCO2_uptake,_carboxysome
172039193	ALLHQGLTISTEYATSRR	ref|NC_010546.1|:c4409231-4407231_carbon_dioxide_concentrating_mechanism_protein_[Cyanothece_sp._ATCC_51142	si_0059x0.3xCarbohydratesxCO2_fixationxCO2_uptake,_carboxysome
172039193	ESEVIAALEGCLAEHQGEYVR	ref|NC_010546.1|:c4409231-4407231_carbon_dioxide_concentrating_mechanism_protein_[Cyanothece_sp._ATCC_51142	si_0059x0.3xCarbohydratesxCO2_fixationxCO2_uptake,_carboxysome
172039193	ESEVINQLNGLLAEHQGEYVR	ref|NC_010546.1|:c4409231-4407231_carbon_dioxide_concentrating_mechanism_protein_[Cyanothece_sp._ATCC_51142	si_0059x0.3xCarbohydratesxCO2_fixationxCO2_uptake,_carboxysome
172039193	FDSQRESEVINQLNGLLAEHQGEYVR	ref|NC_010546.1|:c4409231-4407231_carbon_dioxide_concentrating_mechanism_protein_[Cyanothece_sp._ATCC_51142	si_0059x0.3xCarbohydratesxCO2_fixationxCO2_uptake,_carboxysome
172039193	GGALSADAIAQVR	ref|NC_010546.1|:c4409231-4407231_carbon_dioxide_concentrating_mechanism_protein_[Cyanothece_sp._ATCC_51142	si_0059x0.3xCarbohydratesxCO2_fixationxCO2_uptake,_carboxysome
172039193	GKVGDDVASQVR	ref|NC_010546.1|:c4409231-4407231_carbon_dioxide_concentrating_mechanism_protein_[Cyanothece_sp._ATCC_51142	si_0059x0.3xCarbohydratesxCO2_fixationxCO2_uptake,_carboxysome
172039193	GLLAEHQGEYVR	ref|NC_010546.1|:c4409231-4407231_carbon_dioxide_concentrating_mechanism_protein_[Cyanothece_sp._ATCC_51142	si_0059x0.3xCarbohydratesxCO2_fixationxCO2_uptake,_carboxysome
172039193	GSASASGGALSADAIAQVR	ref|NC_010546.1|:c4409231-4407231_carbon_dioxide_concentrating_mechanism_protein_[Cyanothece_sp._ATCC_51142	si_0059x0.3xCarbohydratesxCO2_fixationxCO2_uptake,_carboxysome
172039193	IDDSAFVH	ref|NC_010546.1|:c4409231-4407231_carbon_dioxide_concentrating_mechanism_protein_[Cyanothece_sp._ATCC_51142	si_0059x0.3xCarbohydratesxCO2_fixationxCO2_uptake,_carboxysome
172039193	IDDSAFVHSFSNLIGDVQVEANVLIAPGTSIR	ref|NC_010546.1|:c4409231-4407231_carbon_dioxide_concentrating_mechanism_protein_[Cyanothece_sp._ATCC_51142	si_0059x0.3xCarbohydratesxCO2_fixationxCO2_uptake,_carboxysome
172039193	IGTEHASQR	ref|NC_010546.1|:c4409231-4407231_carbon_dioxide_concentrating_mechanism_protein_[Cyanothece_sp._ATCC_51142	si_0059x0.3xCarbohydratesxCO2_fixationxCO2_uptake,_carboxysome
172039193	KGSASASGGALSADAIAQVR	ref|NC_010546.1|:c4409231-4407231_carbon_dioxide_concentrating_mechanism_protein_[Cyanothece_sp._ATCC_51142	si_0059x0.3xCarbohydratesxCO2_fixationxCO2_uptake,_carboxysome
172039193	LIGIDPQVK	ref|NC_010546.1|:c4409231-4407231_carbon_dioxide_concentrating_mechanism_protein_[Cyanothece_sp._ATCC_51142	si_0059x0.3xCarbohydratesxCO2_fixationxCO2_uptake,_carboxysome
172039193	LIGIDSQAR	ref|NC_010546.1|:c4409231-4407231_carbon_dioxide_concentrating_mechanism_protein_[Cyanothece_sp._ATCC_51142	si_0059x0.3xCarbohydratesxCO2_fixationxCO2_uptake,_carboxysome
172039193	LIGIDSQARR	ref|NC_010546.1|:c4409231-4407231_carbon_dioxide_concentrating_mechanism_protein_[Cyanothece_sp._ATCC_51142	si_0059x0.3xCarbohydratesxCO2_fixationxCO2_uptake,_carboxysome
172039193	LIGVDPNAK	ref|NC_010546.1|:c4409231-4407231_carbon_dioxide_concentrating_mechanism_protein_[Cyanothece_sp._ATCC_51142	si_0059x0.3xCarbohydratesxCO2_fixationxCO2_uptake,_carboxysome
172039193	LIGVDPNAKR	ref|NC_010546.1|:c4409231-4407231_carbon_dioxide_concentrating_mechanism_protein_[Cyanothece_sp._ATCC_51142	si_0059x0.3xCarbohydratesxCO2_fixationxCO2_uptake,_carboxysome
172039193	LIVQRPEDTPGEPSRITTTK	ref|NC_010546.1|:c4409231-4407231_carbon_dioxide_concentrating_mechanism_protein_[Cyanothece_sp._ATCC_51142	si_0059x0.3xCarbohydratesxCO2_fixationxCO2_uptake,_carboxysome
172039193	LLGVDTGAK	ref|NC_010546.1|:c4409231-4407231_carbon_dioxide_concentrating_mechanism_protein_[Cyanothece_sp._ATCC_51142	si_0059x0.3xCarbohydratesxCO2_fixationxCO2_uptake,_carboxysome
172039193	LLGVDTGAKR	ref|NC_010546.1|:c4409231-4407231_carbon_dioxide_concentrating_mechanism_protein_[Cyanothece_sp._ATCC_51142	si_0059x0.3xCarbohydratesxCO2_fixationxCO2_uptake,_carboxysome
172039193	LPEVTESDR	ref|NC_010546.1|:c4409231-4407231_carbon_dioxide_concentrating_mechanism_protein_[Cyanothece_sp._ATCC_51142	si_0059x0.3xCarbohydratesxCO2_fixationxCO2_uptake,_carboxysome
172039193	LTGGTFEGRADQVLADLEAFLQEHQGEYVR	ref|NC_010546.1|:c4409231-4407231_carbon_dioxide_concentrating_mechanism_protein_[Cyanothece_sp._ATCC_51142	si_0059x0.3xCarbohydratesxCO2_fixationxCO2_uptake,_carboxysome
172039193	NLTTEAVAQVR	ref|NC_010546.1|:c4409231-4407231_carbon_dioxide_concentrating_mechanism_protein_[Cyanothece_sp._ATCC_51142	si_0059x0.3xCarbohydratesxCO2_fixationxCO2_uptake,_carboxysome
172039193	RVAETIIQRPGDNPSNGR	ref|NC_010546.1|:c4409231-4407231_carbon_dioxide_concentrating_mechanism_protein_[Cyanothece_sp._ATCC_51142	si_0059x0.3xCarbohydratesxCO2_fixationxCO2_uptake,_carboxysome
172039193	RVAETIIQRPGDNPSNGRSTTATATATAPSK	ref|NC_010546.1|:c4409231-4407231_carbon_dioxide_concentrating_mechanism_protein_[Cyanothece_sp._ATCC_51142	si_0059x0.3xCarbohydratesxCO2_fixationxCO2_uptake,_carboxysome
172039193	RVLELIVQRPEDTPGEPSR	ref|NC_010546.1|:c4409231-4407231_carbon_dioxide_concentrating_mechanism_protein_[Cyanothece_sp._ATCC_51142	si_0059x0.3xCarbohydratesxCO2_fixationxCO2_uptake,_carboxysome
172039193	RVLELIVQRPEDTPGEPSRITTTK	ref|NC_010546.1|:c4409231-4407231_carbon_dioxide_concentrating_mechanism_protein_[Cyanothece_sp._ATCC_51142	si_0059x0.3xCarbohydratesxCO2_fixationxCO2_uptake,_carboxysome
172039193	SIKDINQSDYR	ref|NC_010546.1|:c4409231-4407231_carbon_dioxide_concentrating_mechanism_protein_[Cyanothece_sp._ATCC_51142	si_0059x0.3xCarbohydratesxCO2_fixationxCO2_uptake,_carboxysome
172039193	SKVDTTSVK	ref|NC_010546.1|:c4409231-4407231_carbon_dioxide_concentrating_mechanism_protein_[Cyanothece_sp._ATCC_51142	si_0059x0.3xCarbohydratesxCO2_fixationxCO2_uptake,_carboxysome
172039193	SKVDTTSVKA	ref|NC_010546.1|:c4409231-4407231_carbon_dioxide_concentrating_mechanism_protein_[Cyanothece_sp._ATCC_51142	si_0059x0.3xCarbohydratesxCO2_fixationxCO2_uptake,_carboxysome
172039193	SKVDTTSVKAA	ref|NC_010546.1|:c4409231-4407231_carbon_dioxide_concentrating_mechanism_protein_[Cyanothece_sp._ATCC_51142	si_0059x0.3xCarbohydratesxCO2_fixationxCO2_uptake,_carboxysome
172039193	SKVDTTSVKAASNGNGK	ref|NC_010546.1|:c4409231-4407231_carbon_dioxide_concentrating_mechanism_protein_[Cyanothece_sp._ATCC_51142	si_0059x0.3xCarbohydratesxCO2_fixationxCO2_uptake,_carboxysome
172039193	SKVDTTSVKAASNGNGKVGDDVASQVR	ref|NC_010546.1|:c4409231-4407231_carbon_dioxide_concentrating_mechanism_protein_[Cyanothece_sp._ATCC_51142	si_0059x0.3xCarbohydratesxCO2_fixationxCO2_uptake,_carboxysome
172039193	SLLSQGYKIGTEHA	ref|NC_010546.1|:c4409231-4407231_carbon_dioxide_concentrating_mechanism_protein_[Cyanothece_sp._ATCC_51142	si_0059x0.3xCarbohydratesxCO2_fixationxCO2_uptake,_carboxysome
172039193	SLLSQGYKIGTEHADK	ref|NC_010546.1|:c4409231-4407231_carbon_dioxide_concentrating_mechanism_protein_[Cyanothece_sp._ATCC_51142	si_0059x0.3xCarbohydratesxCO2_fixationxCO2_uptake,_carboxysome
172039193	SLLSQGYKIGTEHASQR	ref|NC_010546.1|:c4409231-4407231_carbon_dioxide_concentrating_mechanism_protein_[Cyanothece_sp._ATCC_51142	si_0059x0.3xCarbohydratesxCO2_fixationxCO2_uptake,_carboxysome
172039193	SLLSQGYSIGAEYANK	ref|NC_010546.1|:c4409231-4407231_carbon_dioxide_concentrating_mechanism_protein_[Cyanothece_sp._ATCC_51142	si_0059x0.3xCarbohydratesxCO2_fixationxCO2_uptake,_carboxysome
172039193	SLLSQGYSIGAEYANKR	ref|NC_010546.1|:c4409231-4407231_carbon_dioxide_concentrating_mechanism_protein_[Cyanothece_sp._ATCC_51142	si_0059x0.3xCarbohydratesxCO2_fixationxCO2_uptake,_carboxysome
172039193	SLSSNIVAQVR	ref|NC_010546.1|:c4409231-4407231_carbon_dioxide_concentrating_mechanism_protein_[Cyanothece_sp._ATCC_51142	si_0059x0.3xCarbohydratesxCO2_fixationxCO2_uptake,_carboxysome
172039193	SNGNGKVGDDVASQVR	ref|NC_010546.1|:c4409231-4407231_carbon_dioxide_concentrating_mechanism_protein_[Cyanothece_sp._ATCC_51142	si_0059x0.3xCarbohydratesxCO2_fixationxCO2_uptake,_carboxysome
172039193	STTATATATAPSK	ref|NC_010546.1|:c4409231-4407231_carbon_dioxide_concentrating_mechanism_protein_[Cyanothece_sp._ATCC_51142	si_0059x0.3xCarbohydratesxCO2_fixationxCO2_uptake,_carboxysome
172039193	STTATATATAPSKTR	ref|NC_010546.1|:c4409231-4407231_carbon_dioxide_concentrating_mechanism_protein_[Cyanothece_sp._ATCC_51142	si_0059x0.3xCarbohydratesxCO2_fixationxCO2_uptake,_carboxysome
172039193	SWLTGGTFEGR	ref|NC_010546.1|:c4409231-4407231_carbon_dioxide_concentrating_mechanism_protein_[Cyanothece_sp._ATCC_51142	si_0059x0.3xCarbohydratesxCO2_fixationxCO2_uptake,_carboxysome
172039193	SWLTGGTFEGRADQVLADLEAFLQEHQGEYVR	ref|NC_010546.1|:c4409231-4407231_carbon_dioxide_concentrating_mechanism_protein_[Cyanothece_sp._ATCC_51142	si_0059x0.3xCarbohydratesxCO2_fixationxCO2_uptake,_carboxysome
172039193	SWLTGPSFDSQR	ref|NC_010546.1|:c4409231-4407231_carbon_dioxide_concentrating_mechanism_protein_[Cyanothece_sp._ATCC_51142	si_0059x0.3xCarbohydratesxCO2_fixationxCO2_uptake,_carboxysome
172039193	SWLTGPSFDSQRESEVINQLNGLLAEHQGEYVR	ref|NC_010546.1|:c4409231-4407231_carbon_dioxide_concentrating_mechanism_protein_[Cyanothece_sp._ATCC_51142	si_0059x0.3xCarbohydratesxCO2_fixationxCO2_uptake,_carboxysome
172039193	SWQSCSPIDSTRESEVIAALEGCLAEHQGEYVR	ref|NC_010546.1|:c4409231-4407231_carbon_dioxide_concentrating_mechanism_protein_[Cyanothece_sp._ATCC_51142	si_0059x0.3xCarbohydratesxCO2_fixationxCO2_uptake,_carboxysome
172039193	SYSTNSNGNGR	ref|NC_010546.1|:c4409231-4407231_carbon_dioxide_concentrating_mechanism_protein_[Cyanothece_sp._ATCC_51142	si_0059x0.3xCarbohydratesxCO2_fixationxCO2_uptake,_carboxysome
172039193	SYSTNSNGNGRVATSNLTTEAVAQVR	ref|NC_010546.1|:c4409231-4407231_carbon_dioxide_concentrating_mechanism_protein_[Cyanothece_sp._ATCC_51142	si_0059x0.3xCarbohydratesxCO2_fixationxCO2_uptake,_carboxysome
172039193	TKSWLTGGTFEGR	ref|NC_010546.1|:c4409231-4407231_carbon_dioxide_concentrating_mechanism_protein_[Cyanothece_sp._ATCC_51142	si_0059x0.3xCarbohydratesxCO2_fixationxCO2_uptake,_carboxysome
172039193	TKSWLTGGTFEGRADQVLADLEAFLQEHQGEYVR	ref|NC_010546.1|:c4409231-4407231_carbon_dioxide_concentrating_mechanism_protein_[Cyanothece_sp._ATCC_51142	si_0059x0.3xCarbohydratesxCO2_fixationxCO2_uptake,_carboxysome
172039193	TKSWLTGPSFDSQR	ref|NC_010546.1|:c4409231-4407231_carbon_dioxide_concentrating_mechanism_protein_[Cyanothece_sp._ATCC_51142	si_0059x0.3xCarbohydratesxCO2_fixationxCO2_uptake,_carboxysome
172039193	TKSWLTGPSFDSQRESEVINQLNGLLAEHQGEYVR	ref|NC_010546.1|:c4409231-4407231_carbon_dioxide_concentrating_mechanism_protein_[Cyanothece_sp._ATCC_51142	si_0059x0.3xCarbohydratesxCO2_fixationxCO2_uptake,_carboxysome
172039193	TKSWQSCSPIDSTRESEVIAALEGCLAEHQGEYVR	ref|NC_010546.1|:c4409231-4407231_carbon_dioxide_concentrating_mechanism_protein_[Cyanothece_sp._ATCC_51142	si_0059x0.3xCarbohydratesxCO2_fixationxCO2_uptake,_carboxysome
172039193	VAETIIQRPGDNPSNGR	ref|NC_010546.1|:c4409231-4407231_carbon_dioxide_concentrating_mechanism_protein_[Cyanothece_sp._ATCC_51142	si_0059x0.3xCarbohydratesxCO2_fixationxCO2_uptake,_carboxysome
172039193	VAETIIQRPGDNPSNGRSTTATAT	ref|NC_010546.1|:c4409231-4407231_carbon_dioxide_concentrating_mechanism_protein_[Cyanothece_sp._ATCC_51142	si_0059x0.3xCarbohydratesxCO2_fixationxCO2_uptake,_carboxysome
172039193	VAETIIQRPGDNPSNGRSTTATATATAPSK	ref|NC_010546.1|:c4409231-4407231_carbon_dioxide_concentrating_mechanism_protein_[Cyanothece_sp._ATCC_51142	si_0059x0.3xCarbohydratesxCO2_fixationxCO2_uptake,_carboxysome
172039193	VAETIIQRPGDNPSNGRSTTATATATAPSKTR	ref|NC_010546.1|:c4409231-4407231_carbon_dioxide_concentrating_mechanism_protein_[Cyanothece_sp._ATCC_51142	si_0059x0.3xCarbohydratesxCO2_fixationxCO2_uptake,_carboxysome
172039193	VATSNLTTEAVAQVR	ref|NC_010546.1|:c4409231-4407231_carbon_dioxide_concentrating_mechanism_protein_[Cyanothece_sp._ATCC_51142	si_0059x0.3xCarbohydratesxCO2_fixationxCO2_uptake,_carboxysome
172039193	VGDDVASQVR	ref|NC_010546.1|:c4409231-4407231_carbon_dioxide_concentrating_mechanism_protein_[Cyanothece_sp._ATCC_51142	si_0059x0.3xCarbohydratesxCO2_fixationxCO2_uptake,_carboxysome
172039193	VLELIVQRPEDTPGEPSR	ref|NC_010546.1|:c4409231-4407231_carbon_dioxide_concentrating_mechanism_protein_[Cyanothece_sp._ATCC_51142	si_0059x0.3xCarbohydratesxCO2_fixationxCO2_uptake,_carboxysome
172039193	VLELIVQRPEDTPGEPSRITTTK	ref|NC_010546.1|:c4409231-4407231_carbon_dioxide_concentrating_mechanism_protein_[Cyanothece_sp._ATCC_51142	si_0059x0.3xCarbohydratesxCO2_fixationxCO2_uptake,_carboxysome
172039193	VSQTIIQRPGEPGR	ref|NC_010546.1|:c4409231-4407231_carbon_dioxide_concentrating_mechanism_protein_[Cyanothece_sp._ATCC_51142	si_0059x0.3xCarbohydratesxCO2_fixationxCO2_uptake,_carboxysome
172039193	VSQTIIQRPGEPGRIQ	ref|NC_010546.1|:c4409231-4407231_carbon_dioxide_concentrating_mechanism_protein_[Cyanothece_sp._ATCC_51142	si_0059x0.3xCarbohydratesxCO2_fixationxCO2_uptake,_carboxysome
172039193	VSQTIIQRPGEPGRIQSNSR	ref|NC_010546.1|:c4409231-4407231_carbon_dioxide_concentrating_mechanism_protein_[Cyanothece_sp._ATCC_51142	si_0059x0.3xCarbohydratesxCO2_fixationxCO2_uptake,_carboxysome
172039193	VVGDDGQEYSVWIGK	ref|NC_010546.1|:c4409231-4407231_carbon_dioxide_concentrating_mechanism_protein_[Cyanothece_sp._ATCC_51142	si_0059x0.3xCarbohydratesxCO2_fixationxCO2_uptake,_carboxysome
172039193	YVPSGAVITNQQQADR	ref|NC_010546.1|:c4409231-4407231_carbon_dioxide_concentrating_mechanism_protein_[Cyanothece_sp._ATCC_51142	si_0059x0.3xCarbohydratesxCO2_fixationxCO2_uptake,_carboxysome
172039193	YVPSGAVITNQQQADRLPEVTESDR	ref|NC_010546.1|:c4409231-4407231_carbon_dioxide_concentrating_mechanism_protein_[Cyanothece_sp._ATCC_51142	si_0059x0.3xCarbohydratesxCO2_fixationxCO2_uptake,_carboxysome
172039192	QAFNQSQNHSASDNSANNNK	ref|NC_010546.1|:c4407121-4406399_carbon_dioxide_concentrating_mechanism_protein_[Cyanothece_sp._ATCC_51142	si_0059x0.5xCarbohydratesxCO2_fixationxCO2_uptake,_carboxysome
172039192	SGTTIEAGSLVGDTSR	ref|NC_010546.1|:c4407121-4406399_carbon_dioxide_concentrating_mechanism_protein_[Cyanothece_sp._ATCC_51142	si_0059x0.5xCarbohydratesxCO2_fixationxCO2_uptake,_carboxysome
172039191	AGYQVLVLEK	ref|NC_010546.1|:c4406268-4404586_zeta-carotene_desaturase_[Cyanothece_sp._ATCC_51142	si_0003x0.1xAmino_Acids_and_DerivativesxAlanine,_serine,_and_glycinexGlycine_cleavage_system
172039191	AVPGGAATTEEAMPK	ref|NC_010546.1|:c4406268-4404586_zeta-carotene_desaturase_[Cyanothece_sp._ATCC_51142	si_0003x0.1xAmino_Acids_and_DerivativesxAlanine,_serine,_and_glycinexGlycine_cleavage_system
172039191	DVLNVVGSPNK	ref|NC_010546.1|:c4406268-4404586_zeta-carotene_desaturase_[Cyanothece_sp._ATCC_51142	si_0003x0.1xAmino_Acids_and_DerivativesxAlanine,_serine,_and_glycinexGlycine_cleavage_system
172039191	FGLEYLYCDPVVFCPHPDGK	ref|NC_010546.1|:c4406268-4404586_zeta-carotene_desaturase_[Cyanothece_sp._ATCC_51142	si_0003x0.1xAmino_Acids_and_DerivativesxAlanine,_serine,_and_glycinexGlycine_cleavage_system
172039191	GLFLTGAGTHPGGSISGMPGR	ref|NC_010546.1|:c4406268-4404586_zeta-carotene_desaturase_[Cyanothece_sp._ATCC_51142	si_0003x0.1xAmino_Acids_and_DerivativesxAlanine,_serine,_and_glycinexGlycine_cleavage_system
172039191	GRIPDQDPSMYVVMPTQLDPSMAPEGK	ref|NC_010546.1|:c4406268-4404586_zeta-carotene_desaturase_[Cyanothece_sp._ATCC_51142	si_0003x0.1xAmino_Acids_and_DerivativesxAlanine,_serine,_and_glycinexGlycine_cleavage_system
172039191	GVVLTEQTVEK	ref|NC_010546.1|:c4406268-4404586_zeta-carotene_desaturase_[Cyanothece_sp._ATCC_51142	si_0003x0.1xAmino_Acids_and_DerivativesxAlanine,_serine,_and_glycinexGlycine_cleavage_system
172039191	HGVISNIDAK	ref|NC_010546.1|:c4406268-4404586_zeta-carotene_desaturase_[Cyanothece_sp._ATCC_51142	si_0003x0.1xAmino_Acids_and_DerivativesxAlanine,_serine,_and_glycinexGlycine_cleavage_system
172039191	HTLWIEFFAPYQIAGAENTGLNGTGWTDTLK	ref|NC_010546.1|:c4406268-4404586_zeta-carotene_desaturase_[Cyanothece_sp._ATCC_51142	si_0003x0.1xAmino_Acids_and_DerivativesxAlanine,_serine,_and_glycinexGlycine_cleavage_system
172039191	IINNNESLLK	ref|NC_010546.1|:c4406268-4404586_zeta-carotene_desaturase_[Cyanothece_sp._ATCC_51142	si_0003x0.1xAmino_Acids_and_DerivativesxAlanine,_serine,_and_glycinexGlycine_cleavage_system
172039191	LADYSPNLK	ref|NC_010546.1|:c4406268-4404586_zeta-carotene_desaturase_[Cyanothece_sp._ATCC_51142	si_0003x0.1xAmino_Acids_and_DerivativesxAlanine,_serine,_and_glycinexGlycine_cleavage_system
172039191	LFLNLVDPADIDSADPK	ref|NC_010546.1|:c4406268-4404586_zeta-carotene_desaturase_[Cyanothece_sp._ATCC_51142	si_0003x0.1xAmino_Acids_and_DerivativesxAlanine,_serine,_and_glycinexGlycine_cleavage_system
172039191	LFLNLVDPADIDSADPKLR	ref|NC_010546.1|:c4406268-4404586_zeta-carotene_desaturase_[Cyanothece_sp._ATCC_51142	si_0003x0.1xAmino_Acids_and_DerivativesxAlanine,_serine,_and_glycinexGlycine_cleavage_system
172039191	LSAELGMAPSQK	ref|NC_010546.1|:c4406268-4404586_zeta-carotene_desaturase_[Cyanothece_sp._ATCC_51142	si_0003x0.1xAmino_Acids_and_DerivativesxAlanine,_serine,_and_glycinexGlycine_cleavage_system
172039191	RLFLNLVDPADIDSADPK	ref|NC_010546.1|:c4406268-4404586_zeta-carotene_desaturase_[Cyanothece_sp._ATCC_51142	si_0003x0.1xAmino_Acids_and_DerivativesxAlanine,_serine,_and_glycinexGlycine_cleavage_system
172039191	RLFLNLVDPADIDSADPKLR	ref|NC_010546.1|:c4406268-4404586_zeta-carotene_desaturase_[Cyanothece_sp._ATCC_51142	si_0003x0.1xAmino_Acids_and_DerivativesxAlanine,_serine,_and_glycinexGlycine_cleavage_system
172039191	RVESPAELGER	ref|NC_010546.1|:c4406268-4404586_zeta-carotene_desaturase_[Cyanothece_sp._ATCC_51142	si_0003x0.1xAmino_Acids_and_DerivativesxAlanine,_serine,_and_glycinexGlycine_cleavage_system
172039191	SIIDIAGGYNINALK	ref|NC_010546.1|:c4406268-4404586_zeta-carotene_desaturase_[Cyanothece_sp._ATCC_51142	si_0003x0.1xAmino_Acids_and_DerivativesxAlanine,_serine,_and_glycinexGlycine_cleavage_system
172039191	SIIDIAGGYNINALKDVLNVVGSPNK	ref|NC_010546.1|:c4406268-4404586_zeta-carotene_desaturase_[Cyanothece_sp._ATCC_51142	si_0003x0.1xAmino_Acids_and_DerivativesxAlanine,_serine,_and_glycinexGlycine_cleavage_system
172039191	SLAIGAMMMSLR	ref|NC_010546.1|:c4406268-4404586_zeta-carotene_desaturase_[Cyanothece_sp._ATCC_51142	si_0003x0.1xAmino_Acids_and_DerivativesxAlanine,_serine,_and_glycinexGlycine_cleavage_system
172039191	TMLTSAEDLLDEWLTEPWLK	ref|NC_010546.1|:c4406268-4404586_zeta-carotene_desaturase_[Cyanothece_sp._ATCC_51142	si_0003x0.1xAmino_Acids_and_DerivativesxAlanine,_serine,_and_glycinexGlycine_cleavage_system
172039190	ADVVVHSAGPFHYR	ref|NC_010546.1|:c4404546-4403425_putative_saccharopine_dehydrogenase_[Cyanothece_sp._ATCC_51142	si_0962x1xNo_Function_MatchxNo_Function_MatchxNone
172039190	ALEQHSAAK	ref|NC_010546.1|:c4404546-4403425_putative_saccharopine_dehydrogenase_[Cyanothece_sp._ATCC_51142	si_0962x1xNo_Function_MatchxNo_Function_MatchxNone
172039190	FQDKVQFQVLDLSNQHQVK	ref|NC_010546.1|:c4404546-4403425_putative_saccharopine_dehydrogenase_[Cyanothece_sp._ATCC_51142	si_0962x1xNo_Function_MatchxNo_Function_MatchxNone
172039190	GELVQPGVHPVEQALSTELFQSILK	ref|NC_010546.1|:c4404546-4403425_putative_saccharopine_dehydrogenase_[Cyanothece_sp._ATCC_51142	si_0962x1xNo_Function_MatchxNo_Function_MatchxNone
172039190	IGSSIAQDIINHTEAEVTITGR	ref|NC_010546.1|:c4404546-4403425_putative_saccharopine_dehydrogenase_[Cyanothece_sp._ATCC_51142	si_0962x1xNo_Function_MatchxNo_Function_MatchxNone
172039190	QGVEALDKADEIK	ref|NC_010546.1|:c4404546-4403425_putative_saccharopine_dehydrogenase_[Cyanothece_sp._ATCC_51142	si_0962x1xNo_Function_MatchxNo_Function_MatchxNone
172039190	TAGVTAIINTGVFPGISNSMVR	ref|NC_010546.1|:c4404546-4403425_putative_saccharopine_dehydrogenase_[Cyanothece_sp._ATCC_51142	si_0962x1xNo_Function_MatchxNo_Function_MatchxNone
172039190	TTFIGIQQPFEAWIDNR	ref|NC_010546.1|:c4404546-4403425_putative_saccharopine_dehydrogenase_[Cyanothece_sp._ATCC_51142	si_0962x1xNo_Function_MatchxNo_Function_MatchxNone
172039190	TVEFLAQVSHVMTDVSDR	ref|NC_010546.1|:c4404546-4403425_putative_saccharopine_dehydrogenase_[Cyanothece_sp._ATCC_51142	si_0962x1xNo_Function_MatchxNo_Function_MatchxNone
172039190	TVEFLAQVSHVMTDVSDRFTGTGVAMR	ref|NC_010546.1|:c4404546-4403425_putative_saccharopine_dehydrogenase_[Cyanothece_sp._ATCC_51142	si_0962x1xNo_Function_MatchxNo_Function_MatchxNone
172039190	VQFQVLDLSNQHQVK	ref|NC_010546.1|:c4404546-4403425_putative_saccharopine_dehydrogenase_[Cyanothece_sp._ATCC_51142	si_0962x1xNo_Function_MatchxNo_Function_MatchxNone
172039185	AAQYALDLALYLLR	ref|NC_010546.1|:4400841-4401695_hypothetical_protein_cce_4272_[Cyanothece_sp._ATCC_51142	si_0880x1xStress_ResponsexUnclassified_stress_responsexUniversal_stress_protein_family
172039185	AEMENNPIVAEAATK	ref|NC_010546.1|:4400841-4401695_hypothetical_protein_cce_4272_[Cyanothece_sp._ATCC_51142	si_0880x1xStress_ResponsexUnclassified_stress_responsexUniversal_stress_protein_family
172039185	ALPDLDRLLGTSLSDYVR	ref|NC_010546.1|:4400841-4401695_hypothetical_protein_cce_4272_[Cyanothece_sp._ATCC_51142	si_0880x1xStress_ResponsexUnclassified_stress_responsexUniversal_stress_protein_family
172039185	ASLNILHVVPPQITTDEIATK	ref|NC_010546.1|:4400841-4401695_hypothetical_protein_cce_4272_[Cyanothece_sp._ATCC_51142	si_0880x1xStress_ResponsexUnclassified_stress_responsexUniversal_stress_protein_family
172039185	ASLNILHVVPPQITTDEIATKWEEGGK	ref|NC_010546.1|:4400841-4401695_hypothetical_protein_cce_4272_[Cyanothece_sp._ATCC_51142	si_0880x1xStress_ResponsexUnclassified_stress_responsexUniversal_stress_protein_family
172039185	ASLNILHVVPPQITTDEIATKWEEGGKLIAGILDNLK	ref|NC_010546.1|:4400841-4401695_hypothetical_protein_cce_4272_[Cyanothece_sp._ATCC_51142	si_0880x1xStress_ResponsexUnclassified_stress_responsexUniversal_stress_protein_family
172039185	DSGTGTTQEMLK	ref|NC_010546.1|:4400841-4401695_hypothetical_protein_cce_4272_[Cyanothece_sp._ATCC_51142	si_0880x1xStress_ResponsexUnclassified_stress_responsexUniversal_stress_protein_family
172039185	DYSEAELVLAR	ref|NC_010546.1|:4400841-4401695_hypothetical_protein_cce_4272_[Cyanothece_sp._ATCC_51142	si_0880x1xStress_ResponsexUnclassified_stress_responsexUniversal_stress_protein_family
172039185	ILYADSGTGTTQEMLK	ref|NC_010546.1|:4400841-4401695_hypothetical_protein_cce_4272_[Cyanothece_sp._ATCC_51142	si_0880x1xStress_ResponsexUnclassified_stress_responsexUniversal_stress_protein_family
172039185	ILYADSGTGTTQEMLKVLMDLPAIKK	ref|NC_010546.1|:4400841-4401695_hypothetical_protein_cce_4272_[Cyanothece_sp._ATCC_51142	si_0880x1xStress_ResponsexUnclassified_stress_responsexUniversal_stress_protein_family
172039185	KASLNILHVVPPQITTDEIATKWEEGGK	ref|NC_010546.1|:4400841-4401695_hypothetical_protein_cce_4272_[Cyanothece_sp._ATCC_51142	si_0880x1xStress_ResponsexUnclassified_stress_responsexUniversal_stress_protein_family
172039185	LDPTHVSTMLR	ref|NC_010546.1|:4400841-4401695_hypothetical_protein_cce_4272_[Cyanothece_sp._ATCC_51142	si_0880x1xStress_ResponsexUnclassified_stress_responsexUniversal_stress_protein_family
172039185	LIAGILDNLK	ref|NC_010546.1|:4400841-4401695_hypothetical_protein_cce_4272_[Cyanothece_sp._ATCC_51142	si_0880x1xStress_ResponsexUnclassified_stress_responsexUniversal_stress_protein_family
172039185	LLGTSLSDYVR	ref|NC_010546.1|:4400841-4401695_hypothetical_protein_cce_4272_[Cyanothece_sp._ATCC_51142	si_0880x1xStress_ResponsexUnclassified_stress_responsexUniversal_stress_protein_family
172039185	RVNPDIKPELLPLSKAEMENNPIVAEAATK	ref|NC_010546.1|:4400841-4401695_hypothetical_protein_cce_4272_[Cyanothece_sp._ATCC_51142	si_0880x1xStress_ResponsexUnclassified_stress_responsexUniversal_stress_protein_family
172039185	SPAAQYALDLALYLLR	ref|NC_010546.1|:4400841-4401695_hypothetical_protein_cce_4272_[Cyanothece_sp._ATCC_51142	si_0880x1xStress_ResponsexUnclassified_stress_responsexUniversal_stress_protein_family
172039185	SVSQYVFQLTNHPMLLVK	ref|NC_010546.1|:4400841-4401695_hypothetical_protein_cce_4272_[Cyanothece_sp._ATCC_51142	si_0880x1xStress_ResponsexUnclassified_stress_responsexUniversal_stress_protein_family
172039185	SVSQYVFQLTNHPMLLVKDDVYVK	ref|NC_010546.1|:4400841-4401695_hypothetical_protein_cce_4272_[Cyanothece_sp._ATCC_51142	si_0880x1xStress_ResponsexUnclassified_stress_responsexUniversal_stress_protein_family
172039185	SVSQYVFQLTNHPMLLVKDDVYVKK	ref|NC_010546.1|:4400841-4401695_hypothetical_protein_cce_4272_[Cyanothece_sp._ATCC_51142	si_0880x1xStress_ResponsexUnclassified_stress_responsexUniversal_stress_protein_family
172039185	VLMDLPAIK	ref|NC_010546.1|:4400841-4401695_hypothetical_protein_cce_4272_[Cyanothece_sp._ATCC_51142	si_0880x1xStress_ResponsexUnclassified_stress_responsexUniversal_stress_protein_family
172039185	VLMDLPAIKK	ref|NC_010546.1|:4400841-4401695_hypothetical_protein_cce_4272_[Cyanothece_sp._ATCC_51142	si_0880x1xStress_ResponsexUnclassified_stress_responsexUniversal_stress_protein_family
172039185	VMVALDKSPAAQYALDLALYLLR	ref|NC_010546.1|:4400841-4401695_hypothetical_protein_cce_4272_[Cyanothece_sp._ATCC_51142	si_0880x1xStress_ResponsexUnclassified_stress_responsexUniversal_stress_protein_family
172039185	VNPDIKPELLPLSK	ref|NC_010546.1|:4400841-4401695_hypothetical_protein_cce_4272_[Cyanothece_sp._ATCC_51142	si_0880x1xStress_ResponsexUnclassified_stress_responsexUniversal_stress_protein_family
172039185	VNPDIKPELLPLSKAEMENNPIVAEAATK	ref|NC_010546.1|:4400841-4401695_hypothetical_protein_cce_4272_[Cyanothece_sp._ATCC_51142	si_0880x1xStress_ResponsexUnclassified_stress_responsexUniversal_stress_protein_family
172039185	VNPDIKPELLPLSKAEMENNPIVAEAATKVK	ref|NC_010546.1|:4400841-4401695_hypothetical_protein_cce_4272_[Cyanothece_sp._ATCC_51142	si_0880x1xStress_ResponsexUnclassified_stress_responsexUniversal_stress_protein_family
172039185	WEEGGKLIAGILDNLK	ref|NC_010546.1|:4400841-4401695_hypothetical_protein_cce_4272_[Cyanothece_sp._ATCC_51142	si_0880x1xStress_ResponsexUnclassified_stress_responsexUniversal_stress_protein_family
172039185	WEEGGKLIAGILDNLKLDPTHVSTMLR	ref|NC_010546.1|:4400841-4401695_hypothetical_protein_cce_4272_[Cyanothece_sp._ATCC_51142	si_0880x1xStress_ResponsexUnclassified_stress_responsexUniversal_stress_protein_family
172039185	YADSGTGTTQEMLK	ref|NC_010546.1|:4400841-4401695_hypothetical_protein_cce_4272_[Cyanothece_sp._ATCC_51142	si_0880x1xStress_ResponsexUnclassified_stress_responsexUniversal_stress_protein_family
172039184	KNNPQISPDLQEIDLTGKNLK	ref|NC_010546.1|:4399949-4400755_rfrA_pentapeptide_repeat-containing_protein_[Cyanothece_sp._ATCC_51142	si_0962x1xNo_Function_MatchxNo_Function_MatchxNone
172039184	NSQIQAANFSR	ref|NC_010546.1|:4399949-4400755_rfrA_pentapeptide_repeat-containing_protein_[Cyanothece_sp._ATCC_51142	si_0962x1xNo_Function_MatchxNo_Function_MatchxNone
172039184	QANLIQAHLSEANLIGTSLR	ref|NC_010546.1|:4399949-4400755_rfrA_pentapeptide_repeat-containing_protein_[Cyanothece_sp._ATCC_51142	si_0962x1xNo_Function_MatchxNo_Function_MatchxNone
172039181	GLYQTLAAVDPIFILSGEKF	ref|NC_010546.1|:c4398316-4397726_precorrin-6B_methylase_[Cyanothece_sp._ATCC_51142	si_0190x0.5xCell_Wall_and_CapsulexGram-Negative_cell_wall_componentsxLipid_A_modifications
172039181	ILAGQAPECLNQLEPLPDRICLEGGRPIKEILTEVWQR	ref|NC_010546.1|:c4398316-4397726_precorrin-6B_methylase_[Cyanothece_sp._ATCC_51142	si_0190x0.5xCell_Wall_and_CapsulexGram-Negative_cell_wall_componentsxLipid_A_modifications
172039181	LVATASNLENLYLISEGLAALQAR	ref|NC_010546.1|:c4398316-4397726_precorrin-6B_methylase_[Cyanothece_sp._ATCC_51142	si_0190x0.5xCell_Wall_and_CapsulexGram-Negative_cell_wall_componentsxLipid_A_modifications
172039181	NIEVVQGGVNR	ref|NC_010546.1|:c4398316-4397726_precorrin-6B_methylase_[Cyanothece_sp._ATCC_51142	si_0190x0.5xCell_Wall_and_CapsulexGram-Negative_cell_wall_componentsxLipid_A_modifications
172039181	NIEVVQGGVNRLETK	ref|NC_010546.1|:c4398316-4397726_precorrin-6B_methylase_[Cyanothece_sp._ATCC_51142	si_0190x0.5xCell_Wall_and_CapsulexGram-Negative_cell_wall_componentsxLipid_A_modifications
172039181	SNLENLYLISEGLAALQAR	ref|NC_010546.1|:c4398316-4397726_precorrin-6B_methylase_[Cyanothece_sp._ATCC_51142	si_0190x0.5xCell_Wall_and_CapsulexGram-Negative_cell_wall_componentsxLipid_A_modifications
172039181	SQIIAVERDEDVVNLIR	ref|NC_010546.1|:c4398316-4397726_precorrin-6B_methylase_[Cyanothece_sp._ATCC_51142	si_0190x0.5xCell_Wall_and_CapsulexGram-Negative_cell_wall_componentsxLipid_A_modifications
172039181	SQIIAVERDEDVVNLIRR	ref|NC_010546.1|:c4398316-4397726_precorrin-6B_methylase_[Cyanothece_sp._ATCC_51142	si_0190x0.5xCell_Wall_and_CapsulexGram-Negative_cell_wall_componentsxLipid_A_modifications
172039181	TPGIPDDLFERFPGIPLSK	ref|NC_010546.1|:c4398316-4397726_precorrin-6B_methylase_[Cyanothece_sp._ATCC_51142	si_0190x0.5xCell_Wall_and_CapsulexGram-Negative_cell_wall_componentsxLipid_A_modifications
[truncated: 14,017 more rows]
[truncated: 1 more columns]

## Sheet: PCC7424
GI reference	Peptide sequence	Protein reference	Functional category (SEQUEDEX SEED subsystems)
[truncated: 19,200 more rows]
[truncated: 4 more columns]

[truncated: 3 more sheets: PCC7425, PCC7822, PCC8801]
